# Supplementary material for: Antimicrobial resistance and population genomics of extensively drug resistant Escherichia coli in pig farms in mainland China: a national wide epidemiological and microbiological study
Source: Research Square preprint supplement (doi:10.21203/rs.3.rs-502741/v1), 2021-05-14
Supplement: Supplementary file 1 [file 3d5d637f0684d68a3eb172eb.xlsx]

## Sheet: Sheet1
#FILE	NUM_FOUND	Col(BS512)_1	Col(KPHS6)_1	Col(MG828)_1	Col(MP18)_1	Col(VCM04)_1	Col(Ye4449)_1	Col156_1	Col3M_1	Col440II_1	Col440I_1	Col8282_1	ColE10_1	ColRNAI_1	ColpVC_1	IncA/C2_1	IncB/O/K/Z_1	IncB/O/K/Z_2	IncFIA(HI1)_1_HI1	IncFIA_1	IncFIB(AP001918)_1	IncFIB(K)_1_Kpn3	IncFIB(Mar)_1_pNDM-Mar	IncFIB(pB171)_1_pB171	IncFIB(pHCM2)_1_pHCM2	IncFIC(FII)_1	IncFII(pCRY)_1_pCRY	IncFII(pCoo)_1_pCoo	IncFII(pHN7A8)_1_pHN7A8	IncFII(pRSB107)_1_pRSB107	IncFII_1	IncHI1A_1	IncHI1B(R27)_1_R27	IncHI1B_1_pNDM-MAR	IncHI2A_1	IncHI2_1	IncI1_1_Alpha	IncI2_1	IncI2_1_Delta	IncI_Gamma_1	IncN_1	IncP1_3	IncQ1_1	IncR_1	IncU_1	IncX1_1	IncX1_4	IncX2_1	IncX3_1
AH1-contigs.fna	5	.	.	.	.	.	.	.	.	.	.	.	.	.	.	.	.	.	100	.	.	100	.	.	.	.	.	.	.	.	.	.	.	.	.	.	.	.	100	.	.	.	.	.	.	100	.	.	.
AH10-contigs.fna	6	.	.	.	.	.	.	.	.	.	.	.	.	100.00;100.00	.	.	.	.	.	100	100	.	.	.	.	.	.	.	.	.	100	.	.	.	.	.	.	.	100	.	.	.	.	.	.	100	.	.	.
AH11-contigs.fna	7	.	100	.	.	.	.	100	.	.	100	.	.	98.46	.	.	.	.	.	.	.	.	.	.	.	.	.	.	.	.	.	.	.	.	.	.	.	.	.	.	.	.	.	100	.	100	.	.	.
AH12-contigs.fna	7	.	100	100	.	.	.	.	.	.	.	.	.	100	.	.	.	.	.	.	.	.	.	.	.	.	.	99.62	.	.	.	.	.	.	.	.	.	.	.	.	.	.	.	.	.	100	.	.	.
AH13-contigs.fna	3	.	.	.	.	.	.	.	.	.	.	.	.	100	.	.	.	.	.	.	.	.	.	.	.	.	.	.	.	.	.	.	.	.	.	.	.	.	.	97.16	.	.	.	.	.	100	.	.	.
AH15-contigs.fna	3	.	.	.	.	.	.	.	.	.	.	.	.	.	.	.	.	.	.	.	.	100	.	.	.	.	.	.	.	.	.	.	.	.	.	.	.	.	.	.	.	.	.	.	.	100	.	.	.
AH16-contigs.fna	8	.	.	.	.	.	.	100	.	.	.	.	.	.	.	.	.	.	.	100	100	.	.	.	.	.	.	.	.	.	100	.	.	.	.	.	.	.	.	.	.	100	.	.	.	100	.	.	.
AH19-contigs.fna	4	.	.	.	.	.	.	.	.	.	.	.	.	100	.	.	.	.	.	.	.	.	.	.	.	.	.	.	100	.	100	.	.	.	.	.	.	.	.	.	.	98.52	.	.	.	.	.	.	.
AH20-contigs.fna	7	.	.	.	.	.	.	100	.	.	100	.	.	98.46	.	.	.	.	.	.	.	.	.	.	.	.	.	.	.	.	.	.	.	.	.	.	.	.	.	.	.	.	.	100	.	100	.	.	.
AH22-contigs.fna	6	.	.	.	.	.	.	100	.	.	100	.	.	98.46	.	.	.	.	.	.	.	.	.	.	.	.	.	.	.	.	.	.	.	.	.	.	.	.	.	.	.	.	.	100	.	100	.	.	.
AH24-contigs.fna	7	.	.	.	.	.	.	.	.	100	.	.	.	100.00;100.00;100.00	.	.	.	.	.	.	100	.	.	.	.	.	.	.	100	.	.	.	.	.	100	100	.	.	.	.	.	.	.	.	.	.	.	.	.
AH27-contigs.fna	9	.	100	100	.	.	.	.	.	.	.	.	.	.	.	.	.	.	.	100	100	.	.	.	.	.	.	.	.	.	100	.	.	.	.	.	.	.	.	.	.	100	.	.	.	100	.	.	.
AH28-contigs.fna	7	.	.	.	.	.	.	.	.	.	.	.	100	.	.	.	.	.	100	.	100	100	.	.	.	.	.	.	100	.	.	.	.	.	.	.	.	.	.	.	.	.	.	.	.	.	100	.	.
AH29-contigs.fna	5	.	.	.	.	.	.	.	.	.	.	.	.	98.46;83.85	.	.	.	.	100	.	100	100	.	.	.	.	.	.	.	.	100	.	.	.	.	.	.	.	.	.	.	.	.	.	.	.	.	.	.
AH36-contigs.fna	5	.	.	100	.	.	.	.	.	.	.	.	.	100	.	.	.	.	.	.	.	.	.	.	.	.	.	99.62	.	.	.	.	.	.	.	.	.	.	.	.	.	.	.	.	.	100	.	.	.
AH37-contigs.fna	5	.	.	.	.	.	.	.	.	.	.	.	.	100.00;100.00	.	.	.	.	.	100	100	.	.	.	.	.	.	.	.	.	100	.	.	.	.	.	.	.	.	.	.	.	.	.	.	100	.	.	.
AH4-contigs.fna	6	.	.	.	.	.	.	.	.	.	.	.	.	.	.	.	.	.	.	100	100	.	.	.	.	.	.	.	.	.	100	.	.	.	.	.	.	.	.	.	.	100	.	.	.	100	.	.	.
AH40-contigs.fna	5	.	.	.	.	.	.	.	.	.	.	.	.	.	.	.	.	.	.	100	100	.	.	.	.	.	.	.	.	.	100	.	.	.	.	.	.	.	.	.	.	.	.	.	.	100	.	.	.
AH41-contigs.fna	7	.	.	.	.	.	.	.	.	100	.	.	.	100.00;100.00;100.00	.	.	.	.	.	.	100	.	.	.	.	.	.	.	100	.	.	.	.	.	100	100	.	.	.	.	.	.	.	.	.	.	.	.	.
AH47-contigs.fna	6	.	.	.	.	.	.	.	.	.	100	.	.	.	98.96	.	.	.	.	.	100	.	.	.	.	99.6	.	.	.	.	.	.	.	.	.	.	.	.	.	.	.	.	.	.	.	100	.	.	.
AH48-contigs.fna	4	.	.	.	.	.	.	.	.	.	.	.	.	.	.	.	.	.	.	.	100	.	.	.	.	100.00;99.60	.	.	.	.	.	.	.	.	.	.	.	.	.	.	.	.	.	100	.	100	.	.	.
AH8-contigs.fna	6	.	.	.	.	.	.	.	.	.	.	.	.	100.00;100.00	.	.	.	.	.	100	100	.	.	.	.	.	.	.	.	.	100	.	.	.	.	.	.	.	100	.	.	.	.	.	.	100	.	.	.
AH84-contigs.fna	9	.	.	.	.	.	.	.	.	.	.	.	.	100	.	.	100	.	.	93.56	100	.	.	.	.	99.6	.	.	.	100	.	.	.	.	100	100	.	.	.	.	.	.	.	.	.	.	.	.	.
AH88-contigs.fna	3	.	.	.	.	.	.	.	.	.	.	.	.	100	.	.	.	.	.	.	.	.	.	.	.	.	.	.	.	.	.	.	.	.	.	.	.	.	.	.	.	.	.	100	.	100	.	.	.
AH9-contigs.fna	6	.	.	.	.	.	.	.	.	.	.	99.03	.	98.46	.	.	.	.	.	98.97	100	.	.	.	.	99.8	.	.	.	.	.	.	.	.	.	.	.	.	.	.	.	.	.	.	.	.	.	.	.
AH90-contigs.fna	4	.	.	.	.	.	.	.	.	.	100	.	.	100	.	.	.	.	.	.	.	.	.	.	.	.	.	.	.	.	.	.	.	.	.	.	.	.	.	.	.	.	.	.	.	100	.	.	.
AH91-contigs.fna	3	.	.	.	.	.	.	.	.	.	.	.	.	100	.	.	.	.	.	.	100	.	.	.	.	.	.	.	.	.	100	.	.	.	.	.	.	.	.	.	.	.	.	.	.	.	.	.	.
AH96-contigs.fna	4	.	.	.	.	.	.	.	.	.	100	.	.	.	.	.	.	.	.	.	100	.	.	.	.	.	.	.	.	.	99.62	.	.	.	.	.	100	.	.	.	.	.	.	.	.	.	.	.	.
BJ21-contigs.fna	6	.	.	.	.	.	.	.	.	.	97.37	99.03	.	100	.	.	.	.	.	.	.	.	.	.	.	.	.	.	100	.	.	.	.	.	.	.	.	.	.	.	.	.	.	.	.	100	.	.	.
BJ25-contigs.fna	2	.	.	.	.	.	.	.	.	.	.	.	.	100	.	.	.	.	.	.	100	.	.	.	.	.	.	.	.	.	.	.	.	.	.	.	.	.	.	.	.	.	.	.	.	.	.	.	.
BJ32-contigs.fna	4	.	.	.	.	.	.	.	.	.	.	.	.	.	.	.	.	.	.	.	100	.	.	.	.	.	.	.	100	.	.	.	.	.	.	.	.	.	.	.	100	.	.	.	.	100	.	.	.
CQ1-contigs.fna	9	.	.	97.33	.	.	.	.	.	.	.	.	.	.	.	.	.	.	.	.	100	.	.	.	.	99.6	.	.	.	.	100	.	.	.	100	100	.	100	.	.	.	.	.	.	.	100	.	.	.
CQ10-contigs.fna	5	.	.	.	.	.	.	.	.	.	.	.	.	.	.	.	.	.	.	.	.	.	.	.	.	.	.	.	.	.	.	.	.	.	100	100	.	100	.	.	.	.	.	.	.	.	.	.	.
CQ12-contigs.fna	11	.	.	100	.	.	.	.	.	.	.	.	.	.	.	.	.	.	100	.	.	100	.	.	.	.	.	.	100	.	.	.	.	.	100	100	.	.	100	.	100	.	.	.	.	100	.	.	.
CQ14-contigs.fna	9	.	.	97.33	.	.	.	.	.	.	.	.	.	.	.	.	.	.	.	.	100	.	.	.	.	99.6	.	.	.	.	100	.	.	.	100	100	.	100	.	.	.	.	.	.	.	100	.	.	.
CQ15-contigs.fna	5	.	.	.	.	.	.	.	.	.	.	.	.	.	.	.	.	.	.	.	100	.	.	.	.	99.6	.	.	100	.	.	.	.	.	.	.	.	100	.	.	.	.	.	.	.	100	.	.	.
CQ16-contigs.fna	8	.	.	97.33	.	.	.	.	.	.	.	.	.	.	.	.	.	.	.	.	100	.	.	.	.	99.6	.	.	.	.	100	.	.	.	100	100	.	100	.	.	.	.	.	.	.	.	.	.	.
CQ17-contigs.fna	6	.	.	100	.	.	.	.	.	.	.	.	.	.	.	.	.	.	.	.	100	.	.	.	.	99.6	.	.	100	.	.	.	.	.	.	.	.	100	.	.	.	.	.	.	.	100	.	.	.
CQ2-contigs.fna	11	.	.	100	.	.	.	.	.	.	.	.	.	.	.	.	.	.	100	.	.	100	.	.	.	.	.	.	100	.	.	.	.	.	100	100	.	.	100	.	100	.	.	.	.	100	.	.	.
CQ20-contigs.fna	7	.	.	100	.	.	.	.	.	.	.	.	.	100	.	.	.	.	.	.	100	.	.	.	.	99.6	.	.	100	.	.	.	.	.	.	.	.	.	100	.	.	.	.	.	.	100	.	.	.
CQ21-contigs.fna	4	.	.	.	.	.	.	.	.	.	96.49;100.00	.	.	.	.	.	.	.	.	.	100	.	.	.	.	99.6	.	.	.	.	.	.	.	.	.	.	100	.	.	.	.	.	.	.	.	.	.	.	.
CQ22-contigs.fna	5	.	.	.	.	.	.	.	.	.	96.49;100.00	.	.	100	.	.	.	.	.	.	100	.	.	.	.	99.6	.	.	.	.	.	.	.	.	.	.	100	.	.	.	.	.	.	.	.	.	.	.	.
CQ25-contigs.fna	4	.	.	.	.	.	.	.	.	.	96.49;100.00	.	.	.	.	.	.	.	.	.	100	.	.	.	.	99.6	.	.	.	.	.	.	.	.	.	.	100	.	.	.	.	.	.	.	.	.	.	.	.
CQ26-contigs.fna	4	.	.	.	.	.	.	.	.	.	96.49;100.00	.	.	.	.	.	.	.	.	.	100	.	.	.	.	99.6	.	.	.	.	.	.	.	.	.	.	100	.	.	.	.	.	.	.	.	.	.	.	.
CQ27-contigs.fna	4	.	.	.	.	.	.	.	.	.	.	.	.	.	.	.	.	.	100	.	.	100	.	.	.	.	.	.	100	.	.	.	.	.	.	.	.	.	.	.	100	.	.	.	.	.	.	.	.
CQ28-contigs.fna	4	.	.	.	.	.	.	.	.	.	96.49;100.00	.	.	.	.	.	.	.	.	.	100	.	.	.	.	99.6	.	.	.	.	.	.	.	.	.	.	100	.	.	.	.	.	.	.	.	.	.	.	.
CQ29-contigs.fna	4	.	.	.	.	.	.	.	.	.	96.49;100.00	.	.	.	.	.	.	.	.	.	100	.	.	.	.	99.6	.	.	.	.	.	.	.	.	.	.	100	.	.	.	.	.	.	.	.	.	.	.	.
CQ3-contigs.fna	4	.	.	.	.	.	.	.	.	.	.	.	.	.	.	.	.	.	.	.	100	.	.	.	.	99.6	.	.	100	.	.	.	.	.	.	.	.	100	.	.	.	.	.	.	.	.	.	.	.
CQ30-contigs.fna	4	.	.	.	.	.	.	.	.	.	96.49;100.00	.	.	.	.	.	.	.	.	.	100	.	.	.	.	99.6	.	.	.	.	.	.	.	.	.	.	100	.	.	.	.	.	.	.	.	.	.	.	.
CQ31-contigs.fna	6	.	.	.	.	.	.	.	.	.	.	97.58	.	90.77;100.00	.	.	.	98.75	.	100	100	.	.	.	.	.	.	.	.	.	.	.	.	.	.	.	.	.	.	.	.	.	.	.	.	.	.	.	.
CQ32-contigs.fna	4	.	.	.	.	.	.	.	.	.	96.49;100.00	.	.	.	.	.	.	.	.	.	100	.	.	.	.	99.6	.	.	.	.	.	.	.	.	.	.	100	.	.	.	.	.	.	.	.	.	.	.	.
CQ33-contigs.fna	4	.	.	.	.	.	.	.	.	.	96.49;100.00	.	.	.	.	.	.	.	.	.	100	.	.	.	.	99.6	.	.	.	.	.	.	.	.	.	.	100	.	.	.	.	.	.	.	.	.	.	.	.
CQ34-contigs.fna	4	.	.	.	.	.	.	.	.	.	96.49;100.00	.	.	.	.	.	.	.	.	.	100	.	.	.	.	99.6	.	.	.	.	.	.	.	.	.	.	100	.	.	.	.	.	.	.	.	.	.	.	.
CQ35-contigs.fna	4	.	.	.	.	.	.	.	.	.	96.49;100.00	.	.	.	.	.	.	.	.	.	100	.	.	.	.	99.6	.	.	.	.	.	.	.	.	.	.	100	.	.	.	.	.	.	.	.	.	.	.	.
CQ36-contigs.fna	4	.	.	99.24	98.96	.	.	.	.	.	98.25	.	.	.	.	.	.	.	.	.	.	.	.	.	.	.	.	.	.	.	.	.	.	.	.	.	.	.	.	.	.	.	.	.	.	100	.	.	.
CQ4-contigs.fna	6	.	.	92.75	.	.	.	.	.	.	.	.	.	.	.	.	.	.	.	.	100	.	.	.	.	99.6	.	.	100	.	.	.	.	.	.	.	.	.	100	.	.	.	.	.	.	100	.	.	.
CQ42-contigs.fna	5	.	.	.	.	.	.	.	.	.	.	.	.	.	.	.	.	.	.	100	100	.	.	.	.	99.6	.	.	100	.	.	.	.	.	.	.	100	.	.	.	.	.	.	.	.	.	.	.	.
CQ46-contigs.fna	4	.	.	96.18	.	.	.	.	.	.	.	.	.	.	.	.	.	.	.	.	100	.	.	.	.	99.6	.	.	.	.	.	.	.	.	.	.	.	.	.	.	.	.	.	.	.	100	.	.	.
CQ48-contigs.fna	5	.	.	.	.	.	.	.	.	.	.	.	.	.	.	.	.	.	.	100	100	.	.	.	.	99.6	.	.	100	.	.	.	.	.	.	.	100	.	.	.	.	.	.	.	.	.	.	.	.
CQ51-contigs.fna	5	.	.	96.18	.	.	.	.	.	.	.	.	.	.	.	.	.	.	.	.	100	.	.	.	.	99.6	.	.	.	.	.	.	.	.	.	.	100	.	.	.	.	.	.	.	.	100	.	.	.
CQ52-contigs.fna	7	.	.	.	.	.	.	.	.	.	.	.	.	.	.	.	.	.	.	.	100	.	.	.	.	.	.	.	100	.	.	.	.	.	100	100	.	.	.	.	100	.	.	.	.	100	.	.	.
CQ59-contigs.fna	4	.	.	.	.	.	.	.	.	.	.	.	.	100	.	.	.	.	.	.	100	.	.	.	.	99.6	.	.	.	.	.	.	.	.	.	.	.	.	.	.	.	.	.	.	.	100	.	.	.
CQ63-contigs.fna	3	.	.	.	.	.	.	.	.	.	.	.	.	.	.	.	.	.	100	.	.	100	.	.	.	.	.	.	.	.	.	.	.	.	.	.	.	.	.	.	.	.	.	.	.	.	100	.	.
CQ66-contigs.fna	5	.	.	.	.	.	.	.	.	.	.	.	.	98.46;100.00	.	.	.	.	100	.	.	100	.	.	.	.	.	.	.	.	.	.	.	.	.	.	.	.	.	.	.	.	.	.	.	100	.	.	.
CQ67-contigs.fna	5	.	.	.	.	.	.	.	.	.	.	.	.	100	.	.	.	.	.	.	.	.	.	.	.	.	.	.	.	.	.	.	.	.	.	.	.	.	.	.	.	.	100	.	.	100	.	.	.
CQ69-contigs.fna	6	.	.	.	.	.	.	.	.	.	.	.	.	84.62	.	.	.	.	.	.	.	.	.	.	.	.	.	.	.	.	100	.	.	.	.	.	.	100	.	.	.	.	100	.	.	100	.	.	.
CQ7-contigs.fna	8	.	.	.	.	.	.	.	.	.	.	.	.	.	.	.	.	.	.	.	.	.	.	.	.	.	.	.	.	.	.	.	.	.	100	100	.	.	100	.	.	.	100	100	.	100	.	.	.
CQ72-contigs.fna	9	.	.	.	.	.	.	.	.	.	.	.	.	100	.	.	.	.	100	.	100	100	.	.	.	100	.	.	.	.	.	.	.	.	100	100	.	.	.	.	.	.	.	.	.	.	.	.	.
CQ73-contigs.fna	6	.	.	.	.	.	.	.	.	.	.	.	.	98.46	.	.	.	.	.	.	.	.	.	.	.	.	.	99.62	.	.	.	.	.	.	.	.	.	.	.	.	.	.	.	.	.	100	.	.	90.37
CQ74-contigs.fna	6	.	.	.	.	.	.	.	.	.	.	.	.	100	.	.	.	.	100	.	.	100	.	.	.	.	.	.	100	.	.	.	.	.	.	.	.	.	.	.	.	.	.	.	.	100	.	.	90.37
CQ75-contigs.fna	7	.	.	.	.	.	.	.	.	100	100.00;97.37	.	.	.	.	.	.	.	.	.	.	.	.	.	.	.	.	99.62	.	.	.	.	.	.	.	.	.	.	.	.	.	.	.	.	.	100	.	.	90.37
CQ77-contigs.fna	10	.	.	89.31	.	.	.	.	.	.	96.49	.	.	100	.	.	.	.	100	.	.	100	.	.	.	.	.	.	.	.	99.62	.	.	.	.	.	100	100	.	.	.	.	.	.	.	100	.	.	.
CQ78-contigs.fna	9	.	.	.	.	.	.	.	.	.	.	99.03	.	98.46	.	.	.	.	.	.	100	.	.	.	.	99.6	.	.	.	.	.	.	.	.	100	100	100	100	.	.	.	.	.	.	.	.	.	.	.
CQ79-contigs.fna	5	.	.	.	.	.	.	.	.	.	.	.	.	84.62	100	.	.	.	.	.	.	.	.	.	.	.	.	.	.	.	.	.	.	.	.	.	.	.	.	.	100	.	100	.	.	.	.	.	.
CQ8-contigs.fna	6	.	.	.	.	.	.	.	.	.	.	.	.	100	.	.	.	.	.	.	100	.	.	.	.	99.6	.	.	100	.	.	.	.	.	.	.	.	.	100	.	.	.	.	.	.	100	.	.	.
CQ80-contigs.fna	6	.	.	.	.	.	.	.	.	.	.	.	.	98.46	.	.	.	.	.	.	.	.	.	.	.	.	.	99.62	.	.	.	.	.	.	.	.	.	.	.	.	.	.	.	.	.	100	.	.	90.37
CQ9-contigs.fna	6	.	.	100	.	.	.	.	.	.	.	.	.	.	.	.	.	.	.	.	100	.	.	.	.	99.6	.	.	100	.	.	.	.	.	.	.	.	.	100	.	.	.	.	.	.	100	.	.	.
CQ92-contigs.fna	4	.	.	.	.	.	.	.	.	.	.	.	.	.	.	.	.	.	.	.	100	.	.	.	.	99.6	.	.	.	.	.	.	.	.	.	.	.	.	.	.	.	.	.	.	.	100	.	.	.
E_coli_RXD10.fna	14	.	.	100	.	.	.	100	.	.	.	99.03	100	92.31;100.00;100.00	.	.	.	.	.	98.97	100	.	.	.	.	91.78	.	.	100	.	.	.	.	.	100	100	100	.	.	.	.	.	.	.	.	100	.	.	.
E_coli_RXD5.fna	13	.	.	.	.	.	.	100	.	.	.	99.03	100	100.00;92.31;100.00;100.00	.	.	.	.	.	98.97	100	.	.	.	.	91.78	.	.	100	.	.	.	.	.	100	100	100	.	.	.	.	.	.	.	.	100	.	.	.
FJ26-contigs.fna	5	.	.	.	.	.	.	.	.	.	.	.	.	100	100	.	.	.	100	.	.	100	.	.	.	.	.	.	.	.	.	.	.	.	.	.	.	.	.	.	.	.	.	.	.	.	.	.	90.37
FJ38-contigs.fna	6	.	.	.	.	.	.	.	.	.	.	.	.	100	100	.	.	.	100	.	.	100	.	.	.	.	.	.	.	.	.	.	.	.	.	.	.	.	.	.	.	.	.	.	.	100.00;100.00	.	.	90.37
FY119-contigs.fna	1	.	.	.	.	.	.	.	.	.	.	.	.	.	.	.	.	.	.	.	.	.	.	.	.	.	.	.	.	.	.	.	.	.	.	.	.	.	.	.	.	.	.	.	.	.	.	.	.
FY183-contigs.fna	7	.	.	.	.	.	.	.	.	.	.	.	.	84.62	.	.	.	.	.	100	.	.	.	.	.	.	.	.	.	.	100	.	.	.	100	100	.	.	.	.	.	.	.	.	.	100	.	.	.
FY187-contigs.fna	3	.	.	.	.	.	.	.	.	.	.	.	.	.	.	.	.	.	100	.	.	100	.	.	.	.	.	.	100	.	.	.	.	.	.	.	.	.	.	.	.	.	.	.	.	.	.	.	.
FY197-contigs.fna	10	.	.	100	.	.	.	.	.	.	.	.	100	86.15	.	.	.	.	100	.	.	100	100	.	.	.	.	.	100	.	.	.	.	100	.	.	.	.	.	.	.	.	.	.	.	100	.	.	.
FY207-contigs.fna	6	.	.	.	.	.	.	.	.	.	97.37	.	.	.	.	.	.	.	99.74	.	100	100	.	.	.	.	.	.	100	.	.	.	.	.	.	.	.	.	.	.	.	.	.	.	.	.	.	.	100
FY209-contigs.fna	4	.	.	.	.	.	.	.	.	.	.	99.03	.	.	.	.	.	.	.	.	.	83.04	.	.	.	.	.	.	.	.	.	.	.	.	.	.	.	.	.	.	.	.	.	.	.	.	.	.	100
FY213-contigs.fna	7	.	.	99.24;98.47	.	.	.	100	.	.	.	.	.	.	.	.	.	.	.	100	100	.	.	.	.	.	.	.	.	.	100	.	.	.	.	.	.	.	.	.	.	.	100	.	.	.	.	.	100
FY215-contigs.fna	5	.	.	99.24	.	.	.	.	.	.	.	.	.	.	100	.	.	.	.	93.56	100	.	.	.	.	99.60;99.80	.	.	.	.	.	.	.	.	.	.	.	.	.	.	.	.	.	.	.	.	.	.	.
FY216-contigs.fna	2	.	.	.	.	.	.	.	.	.	.	.	.	.	.	.	.	.	.	.	100	.	.	.	.	.	.	.	.	.	.	.	.	.	.	.	.	.	.	.	.	.	.	.	.	.	.	.	.
FY217-contigs.fna	4	.	.	.	.	.	.	.	.	.	.	.	.	100	.	.	.	.	.	.	.	.	.	.	.	.	.	.	100	.	.	.	.	.	.	.	.	.	.	.	.	.	.	.	.	100	.	.	90.37
FY219-contigs.fna	8	.	.	98.47	.	.	.	.	.	.	.	.	.	100.00;84.62;100.00;100.00	.	.	.	.	.	.	100	.	.	.	.	99.6	.	.	.	.	.	.	.	.	100	100	.	.	.	.	.	.	.	.	.	.	100	.	.
FY227-contigs.fna	8	.	.	98.47	.	.	.	.	.	.	.	.	.	100.00;84.62;100.00;100.00	.	.	.	.	.	.	100	.	.	.	.	99.6	.	.	.	.	.	.	.	.	100	100	.	.	.	.	.	.	.	.	.	.	100	.	.
FY228-contigs.fna	8	.	.	96.95	.	.	.	100	.	.	100	.	.	.	.	.	.	.	.	.	.	.	.	.	.	.	.	.	100	.	.	.	.	.	.	.	100	.	.	.	.	.	.	100	.	100	.	.	.
FY229-contigs.fna	8	.	.	.	.	100	.	.	.	.	.	.	.	100.00;100.00	.	.	.	.	100	.	.	100	100	.	.	.	.	.	.	.	.	.	.	100	.	.	.	.	.	.	.	.	.	.	.	100	.	.	90.37
FY230-contigs.fna	10	.	.	100	.	.	.	.	.	.	.	.	.	.	.	.	.	.	.	93.56	100	.	.	.	.	99.6	.	.	100	.	.	.	.	.	100	100	.	.	100	.	.	.	.	.	.	.	.	.	.
FY237-contigs.fna	8	.	.	.	.	.	.	.	.	.	97.37	.	.	.	.	.	.	.	.	.	100	100	.	.	100	99.6	.	.	.	.	.	.	.	.	.	.	.	.	.	.	.	.	.	100	.	.	.	.	100
FY239-contigs.fna	3	.	.	.	.	.	.	.	.	.	.	.	.	.	.	.	.	.	.	.	.	.	.	.	.	.	.	.	.	.	.	.	.	.	100	100	.	.	.	.	.	.	.	.	.	.	.	.	.
FY240-contigs.fna	6	.	.	.	.	.	.	.	.	.	.	.	.	.	.	.	.	.	.	.	100	.	.	.	.	.	.	99.62	.	.	.	.	.	.	100	100	.	.	.	.	.	.	.	100	.	.	.	.	.
FY241-contigs.fna	8	.	.	.	.	.	100	100	.	.	.	.	.	100.00;100.00	.	.	.	.	.	.	.	.	.	.	.	.	.	.	100	.	.	.	.	.	100	100	.	.	.	.	.	.	.	.	.	.	.	.	.
FY246-contigs.fna	7	.	.	.	.	.	.	.	.	.	97.37	.	.	.	.	.	.	.	99.74	.	100	100	.	.	.	.	.	.	100	.	.	.	.	.	.	.	.	.	.	.	.	.	.	.	.	.	.	.	100
FY248-contigs.fna	3	.	.	.	.	.	.	.	.	.	100	.	.	.	.	.	.	.	.	.	.	100	.	.	.	.	.	.	.	.	.	.	.	.	.	.	.	.	.	.	.	.	.	.	.	.	.	.	100
FY249-contigs.fna	5	.	.	.	.	.	.	.	.	.	.	.	.	100	.	100	.	.	.	.	.	.	.	.	.	.	.	.	.	.	.	.	.	.	.	.	100	100	.	.	100	.	.	.	.	.	.	.	.
FY251-contigs.fna	8	.	.	100	.	.	.	.	.	.	.	.	.	100.00;100.00;100.00	.	.	.	.	.	.	100	.	.	.	.	.	.	.	100	.	.	.	.	.	100	100	.	100	.	.	.	.	.	.	.	.	.	.	.
FY252-contigs.fna	9	.	.	.	.	.	.	100	.	.	.	.	.	100.00;89.23;100.00	98.96	100	.	.	.	.	.	100	.	.	.	.	.	.	.	.	.	.	.	.	.	.	100	100	.	.	100	.	.	100	.	.	.	.	.
FY253-contigs.fna	10	.	.	100	.	.	.	.	.	.	.	.	.	100	.	.	.	.	100	.	.	100	.	.	.	.	.	.	100	.	.	.	.	.	100	100	.	.	.	.	100	.	.	.	.	99.73	.	.	.
FY256-contigs.fna	8	100	.	100	.	.	.	.	.	.	.	.	.	.	.	.	.	.	.	.	.	.	.	.	.	.	.	99.62	.	.	.	.	.	.	100	100	.	.	.	.	.	.	.	.	.	.	.	.	.
FY257-contigs.fna	10	.	.	.	.	.	.	.	.	.	.	.	100	100	.	.	.	.	.	.	.	.	.	.	.	.	.	.	100	.	.	.	.	.	100	100	.	.	.	.	100	.	.	.	.	100	.	.	90.37
FY261-contigs.fna	10	.	.	.	.	.	.	.	.	.	.	.	100	100	.	.	.	.	.	.	.	.	.	.	.	.	.	.	100	.	.	.	.	.	100	100	.	.	.	.	100	.	.	.	.	100	.	.	90.37
FY262-contigs.fna	5	.	.	.	.	.	.	.	.	.	.	.	.	100	.	.	.	.	.	.	.	.	.	.	.	.	.	.	.	.	.	.	.	.	100	100	.	.	.	.	.	.	100	.	.	.	.	.	.
FY267-contigs.fna	10	.	.	.	.	.	.	.	.	.	.	.	100	100	.	.	.	.	.	.	.	.	.	.	.	.	.	.	100	.	.	.	.	.	100	100	.	.	.	.	100	.	.	.	.	100	.	.	90.37
FY268-contigs.fna	10	.	.	100	.	.	.	.	.	.	.	.	.	100	.	.	.	.	100	.	.	100	.	.	.	.	.	.	100	.	.	.	.	.	100	100	.	.	.	.	100	.	.	.	.	99.73	.	.	.
FY44-contigs.fna	10	.	.	98.09	.	.	.	.	.	.	.	.	.	100.00;100.00;100.00	.	.	.	.	100	.	100	100	.	.	.	99.6	.	.	.	.	.	.	.	.	100	100	.	.	.	.	.	.	.	.	.	100	.	.	.
FY45-contigs.fna	6	.	.	.	.	.	.	.	.	.	.	.	.	100.00;100.00	.	.	.	.	.	100	100	.	.	.	.	.	.	.	100	.	100	.	.	.	.	.	.	.	.	.	.	.	.	.	.	.	.	.	.
FY48-contigs.fna	6	.	.	100	.	.	.	.	.	.	.	99.03	.	.	.	.	.	.	.	98.97	100	.	.	.	.	99.8	.	.	.	.	.	.	.	.	.	.	.	.	.	.	.	.	.	.	.	.	.	.	.
FY66-contigs.fna	8	.	.	.	.	.	.	.	.	99.29	97.37	.	.	100.00;100.00	.	.	.	.	.	.	.	.	.	.	.	.	.	.	.	.	.	.	.	.	100	100	.	.	.	.	.	.	.	.	.	100	.	.	.
FY74-contigs.fna	8	.	.	.	.	.	.	.	.	.	.	.	.	100.00;100.00	.	.	.	.	.	100	100	.	.	.	.	.	.	.	100	.	100	.	.	.	.	.	100	.	.	.	.	.	.	100	.	100	.	.	.
GD40-contigs.fna	5	.	.	.	.	.	.	.	.	.	.	99.03	.	.	.	.	.	.	.	100	100	.	.	.	.	.	.	.	.	100	.	.	.	.	.	.	.	.	.	.	.	.	.	.	.	.	.	.	.
GS100-contigs.fna	5	.	.	.	.	.	.	.	.	.	.	99.03	.	.	.	.	.	.	.	.	.	.	.	.	.	.	.	.	100	.	.	.	.	.	.	.	100	.	.	.	.	.	.	.	.	100	.	.	.
GS105-contigs.fna	8	.	.	.	.	.	.	.	.	.	97.37	.	.	100.00;100.00	.	.	.	.	100	.	.	100	.	.	.	.	100	99.62	.	.	.	.	.	.	.	.	.	.	.	.	.	.	.	.	.	100	.	.	.
GS123-contigs.fna	5	.	.	.	.	.	.	.	.	.	.	.	.	100	.	.	.	.	.	100	100	.	.	.	.	.	.	.	.	.	100	.	.	.	.	.	.	.	.	.	.	.	.	.	.	100	.	.	.
GS128-contigs.fna	6	.	.	.	.	.	.	.	.	.	100	.	.	100	.	.	.	.	.	.	.	.	.	.	100	.	.	.	.	.	.	.	.	.	.	.	.	.	.	.	.	.	100	.	.	100	.	.	.
GS133-contigs.fna	4	.	.	.	.	.	.	.	.	.	100	.	.	.	.	.	.	.	.	.	.	100	.	.	.	.	.	.	.	.	.	.	.	.	.	.	.	.	.	.	.	.	100	.	.	100	.	.	.
GS138-contigs.fna	8	.	.	.	.	.	.	.	.	99.29	100	.	.	98.46;96.92	.	.	.	.	.	.	100	.	.	.	.	100	.	.	.	.	.	.	.	.	.	.	.	.	.	.	.	.	100	.	.	100	.	.	.
GS16-contigs.fna	4	.	.	100	.	.	.	.	.	.	100	.	.	100	.	.	.	.	.	.	100	.	.	.	.	.	.	.	.	.	.	.	.	.	.	.	.	.	.	.	.	.	.	.	.	.	.	.	.
GS191-contigs.fna	5	.	.	.	.	.	.	.	.	.	.	.	100	.	.	.	.	.	.	.	100	.	.	.	.	.	.	.	100	.	.	.	.	.	.	.	.	.	.	.	100	.	.	.	.	.	.	.	.
GS207-contigs.fna	4	.	.	100	.	.	.	.	.	.	.	.	.	.	.	.	.	.	.	100	100	.	.	.	.	.	.	99.62	.	.	.	.	.	.	.	.	.	.	.	.	.	.	.	.	.	.	.	.	.
GS208-contigs.fna	4	.	.	100	.	.	.	.	.	.	.	.	.	.	.	.	.	.	.	.	100	.	.	.	.	99.6	.	.	.	.	.	.	.	.	.	.	.	.	.	.	.	.	.	.	.	.	.	.	.
GS29-contigs.fna	2	.	.	.	.	.	.	.	.	.	.	.	.	.	.	.	.	.	.	.	100	.	.	.	.	99.6	.	.	.	.	.	.	.	.	.	.	.	.	.	.	.	.	.	.	.	.	.	.	.
GS3-contigs.fna	7	.	.	.	.	.	.	.	.	99.29	.	.	.	96.92	.	.	.	.	.	.	100	.	.	.	.	.	.	.	.	.	.	.	.	.	100	100	.	.	.	.	.	.	.	.	.	.	.	.	.
GS33-contigs.fna	3	.	.	.	.	.	.	.	.	.	.	.	.	.	.	.	.	.	.	.	100	.	.	.	.	.	.	.	.	.	.	.	.	.	.	.	.	.	.	.	.	.	.	.	.	100	.	.	.
GS34-contigs.fna	3	.	.	.	.	.	.	.	.	.	.	.	.	.	.	.	.	.	.	.	100	.	.	.	.	.	.	.	.	.	.	.	.	.	.	.	.	.	.	.	.	.	.	.	.	100	.	.	.
GS35-contigs.fna	4	.	.	.	.	.	.	.	.	.	.	.	.	100	.	.	.	.	.	.	100	.	.	.	.	.	.	.	.	.	.	.	.	.	.	.	.	.	.	.	.	.	.	.	.	100	.	.	.
GS4-contigs.fna	3	.	.	.	.	.	.	.	.	.	.	.	.	.	.	.	.	.	.	.	100	.	.	.	.	.	.	.	.	.	99.62	.	.	.	.	.	.	.	.	.	.	.	.	.	.	100	.	.	.
GS47-contigs.fna	5	.	.	.	.	.	.	.	.	.	96.49;98.25	.	.	86.15;100.00	.	.	.	.	.	.	.	.	.	.	.	.	.	.	.	.	99.62	.	.	.	.	.	.	.	.	.	.	.	.	100	100	.	.	.	.
GS58-contigs.fna	5	.	.	.	.	.	.	.	.	.	.	.	.	100.00;100.00	.	.	.	.	.	.	.	.	.	.	.	99.6	.	.	.	.	.	.	.	.	.	.	.	.	.	.	.	.	.	100	.	100	.	.	.
GS59-contigs.fna	3	100	.	.	.	.	.	.	.	.	.	.	.	100.00;100.00	.	.	.	.	.	.	.	.	.	.	.	.	.	.	.	.	.	.	.	.	.	.	.	.	.	.	.	.	.	.	.	100	.	.	.
GS6-contigs.fna	1	.	.	.	.	.	.	.	.	.	.	.	.	.	.	.	.	.	.	.	.	.	.	.	.	.	.	.	.	.	.	.	.	.	.	.	.	.	.	.	.	.	.	.	.	100	.	.	.
GS61-contigs.fna	12	.	.	89.31	.	.	.	100.00;100.00	.	.	.	.	.	100	.	.	.	.	100	.	.	100	.	.	.	.	.	.	.	.	.	.	.	.	100	100	100	.	.	.	100	98.52	.	.	.	100	.	.	.
GS62-contigs.fna	4	.	.	.	.	.	.	.	.	.	.	.	.	100	.	.	.	.	.	.	.	.	.	.	100	99.6	.	.	.	.	.	.	.	.	.	.	.	.	.	.	.	.	.	100	.	.	.	.	.
GS72-contigs.fna	4	.	.	.	.	.	.	.	.	.	.	.	.	100	.	.	.	.	.	.	.	.	.	.	100	99.6	.	.	.	.	.	.	.	.	.	.	.	.	.	.	.	.	.	100	.	.	.	.	.
GS78-contigs.fna	5	.	.	.	.	.	.	.	.	.	.	.	.	100.00;100.00	.	.	.	.	.	.	.	.	.	.	.	99.6	.	.	.	.	.	.	.	.	.	.	.	.	.	.	.	.	.	100	.	100	.	.	.
GS8-contigs.fna	8	.	.	.	.	.	.	.	.	.	.	87.44	.	91.54;100.00;98.46	100	.	.	.	.	.	100	100	.	.	.	99.6	.	.	.	.	.	.	.	.	.	.	.	.	.	.	.	.	.	100	.	100	.	.	.
GS82-contigs.fna	8	.	.	100	.	.	.	.	.	.	.	.	.	.	.	.	.	.	.	.	100	.	.	.	.	.	.	99.62	.	.	.	.	.	.	100	100	.	.	.	.	100	.	.	.	.	.	.	.	.
GS84-contigs.fna	7	.	.	.	.	.	.	.	.	.	97.37	.	.	100.00;100.00	.	.	.	.	100	.	.	100	.	.	.	.	100	99.62;100.00	.	.	.	.	.	.	.	.	.	.	.	.	.	.	.	.	.	100	.	.	.
GS85-contigs.fna	8	.	.	.	.	.	.	.	.	99.29	100.00;100.00	.	.	100	.	.	.	.	.	.	.	.	.	.	.	.	.	.	.	.	99.62	.	.	.	100	100	.	.	.	.	.	.	.	.	.	.	.	.	.
GS86-contigs.fna	6	.	.	.	.	.	.	.	.	.	99.12	.	.	86.15;86.15	.	.	.	.	.	.	.	.	.	.	.	.	.	.	.	.	.	.	.	.	100	100	.	.	.	.	.	.	.	.	.	100	.	.	.
GS93-contigs.fna	5	.	.	100	.	.	.	.	.	.	.	.	.	100	.	.	.	.	.	.	100	.	.	.	.	99.6	.	.	.	.	100	.	.	.	.	.	.	.	.	.	.	.	.	.	.	.	.	.	.
GS99-contigs.fna	8	.	.	.	.	.	.	.	.	.	97.37	.	.	100.00;100.00	.	.	.	.	100	.	.	100	.	.	.	.	100	99.62	.	.	.	.	.	.	.	.	.	.	.	.	.	.	.	.	.	100	.	.	.
GX18-contigs.fna	3	.	.	.	.	.	.	.	.	.	.	.	.	92.31	.	.	.	.	.	.	.	.	.	.	.	.	.	.	100	.	.	.	.	.	.	.	.	.	.	.	.	.	.	.	.	.	.	.	.
GX29-contigs.fna	5	.	.	.	.	.	.	.	.	.	.	.	.	.	.	.	.	.	.	93.56	100	.	.	.	.	99.6	.	.	.	.	.	.	.	.	.	.	100	.	.	.	.	.	.	.	.	.	.	.	.
GX37-contigs.fna	4	.	.	.	.	.	.	.	.	.	.	.	.	.	.	.	.	.	.	.	100	.	.	.	.	99.6	.	.	.	.	.	.	.	.	.	.	100	.	.	.	.	.	.	.	.	.	100	.	.
GX38-contigs.fna	4	.	.	.	.	.	.	.	.	.	.	.	.	.	.	.	.	.	.	93.56	100	.	.	.	.	99.6	.	.	.	.	.	.	.	.	.	.	.	.	.	.	.	.	.	.	.	.	.	.	.
GZ10-contigs.fna	10	.	.	.	.	.	.	.	.	.	.	.	.	100.00;100.00	.	.	.	.	100	.	100	100	.	.	.	.	.	.	100	.	.	.	.	.	100	100	100	.	.	.	.	.	.	.	.	100	.	.	.
GZ12-contigs.fna	8	.	.	100	.	.	.	.	.	.	.	.	.	83.08;100.00;100.00;100.00	.	100	.	.	100	.	100	100	.	.	.	.	.	.	100	.	.	.	.	.	.	.	100	.	.	.	.	.	.	.	.	.	.	.	.
GZ18-contigs.fna	5	.	.	.	.	.	.	.	.	.	.	.	.	.	.	.	.	.	.	93.56	100	.	.	.	.	99.6	.	.	.	.	.	.	.	.	.	.	100	.	.	.	.	.	.	.	.	.	100	.	.
GZ29-contigs.fna	7	.	.	.	.	.	.	.	.	.	.	.	.	90.77	.	.	.	.	.	.	.	.	.	.	100	.	.	.	.	100	100	.	.	.	100	100	.	.	.	.	.	.	.	.	.	.	.	.	.
GZ31-contigs.fna	10	.	.	.	.	.	.	.	.	.	.	.	.	100.00;100.00	.	.	.	.	100	.	100	100	.	.	.	.	.	.	100	.	.	.	.	.	100	100	100	.	.	.	.	.	.	.	.	100	.	.	.
GZ34-contigs.fna	3	.	.	.	.	.	.	.	.	.	.	.	.	.	.	.	.	.	.	.	.	.	.	.	.	.	.	.	.	.	.	.	.	.	.	.	.	.	.	.	.	.	100	.	.	100	.	.	.
GZ40-contigs.fna	6	.	.	.	.	.	.	.	.	.	.	.	.	.	.	.	.	.	.	98.97	100	.	.	.	.	100	.	.	.	.	.	.	.	.	100	100	.	.	.	.	.	.	.	.	.	.	.	.	.
GZ43-contigs.fna	4	.	.	.	.	.	.	.	.	.	100	.	100	.	.	.	.	.	.	.	.	100	.	.	.	.	.	.	100	.	.	.	.	.	.	.	.	.	.	.	.	.	.	.	.	.	.	.	.
GZ51-contigs.fna	3	.	.	.	.	.	.	.	.	.	.	.	.	100.00;100.00	.	.	.	.	.	.	.	.	.	.	.	.	.	.	100	.	.	.	.	.	.	.	.	.	.	.	.	.	.	.	.	100	.	.	.
GZ55-contigs.fna	7	.	.	100	.	.	.	.	.	.	.	.	.	100	.	.	.	.	.	100	100	.	.	.	.	.	.	.	.	.	100	.	.	.	.	.	.	.	.	.	.	.	.	.	.	.	100	.	.
GZ64-contigs.fna	4	.	.	.	.	.	.	.	.	.	.	.	.	.	.	.	.	.	.	.	.	.	.	.	.	99.6	.	.	.	.	99.62	.	.	.	.	.	.	.	.	.	.	.	100	100	.	.	.	.	.
GZ86-contigs.fna	3	.	.	.	.	.	.	.	.	.	.	.	.	.	.	.	.	.	.	.	.	.	.	.	.	.	.	.	.	.	.	.	.	.	.	.	.	.	.	.	.	.	.	100	.	100	.	.	.
GZ89-contigs.fna	3	.	.	100	.	.	.	.	.	.	96.49	.	.	100	.	.	.	.	.	.	.	.	.	.	.	.	.	.	.	.	.	.	.	.	.	.	.	.	.	.	.	.	.	.	.	.	.	.	.
GZ9-contigs.fna	7	.	.	.	.	.	.	.	.	.	.	.	.	90.77	.	.	.	.	.	.	.	.	.	.	100	.	.	.	.	100	100	.	.	.	100	100	.	.	.	.	.	.	.	.	.	.	.	.	.
GZ98-contigs.fna	6	.	.	.	.	.	.	.	.	.	.	.	.	100	.	.	.	.	.	.	100	.	.	.	100	.	.	.	.	.	100	.	.	.	.	.	.	.	.	.	.	.	.	.	.	.	100	.	.
HB11-contigs.fna	6	.	.	.	.	.	.	100	.	.	96.49	.	.	.	.	.	.	.	.	.	.	.	.	.	.	.	.	.	100	.	.	.	.	.	.	.	.	.	.	.	.	.	100	100	.	100	.	.	.
HB13-contigs.fna	4	.	.	.	.	.	.	.	.	.	.	.	.	.	.	.	.	.	.	.	100	.	.	.	.	99.6	.	.	100	.	.	.	.	.	.	.	.	.	.	97.16	.	.	.	.	.	.	.	.	.
HB17-contigs.fna	7	.	.	.	.	.	.	100	.	.	96.49	.	.	100	.	.	.	.	.	.	.	.	.	.	.	.	.	.	100	.	.	.	.	.	.	.	.	.	.	.	.	.	100	100	.	100	.	.	.
HB22-contigs.fna	6	.	.	.	.	.	.	.	.	.	.	.	.	90.77	.	.	.	.	.	.	.	.	.	.	.	.	.	.	100	.	100	.	.	.	.	.	.	.	.	.	.	.	.	100	.	100	.	.	90.37
HB23-contigs.fna	3	.	.	.	.	.	.	.	.	.	.	.	.	100	.	.	.	.	.	.	.	.	.	.	.	99.6	.	.	.	.	.	.	.	.	.	.	.	.	.	.	.	.	.	100	.	.	.	.	.
HB24-contigs.fna	6	.	.	99.24	.	.	.	.	.	.	.	.	.	100.00;100.00	.	.	.	.	.	100	100	.	.	.	.	.	.	.	.	.	100	.	.	.	.	.	.	.	.	.	.	.	.	.	.	.	.	.	.
HB27-contigs.fna	6	.	.	.	.	.	.	.	.	.	.	.	.	.	.	.	.	.	.	.	100	.	.	.	.	.	.	.	.	.	100	.	.	.	100	100	.	.	.	.	.	.	.	.	.	.	.	.	.
HB28-contigs.fna	10	.	.	88.17	.	.	.	.	.	.	100	.	.	100	.	100	.	98.12	.	93.56	100	.	.	.	.	99.6	.	.	.	.	.	.	.	.	.	.	100	.	.	.	.	.	.	.	.	100	.	.	.
HB29-contigs.fna	10	.	.	.	.	.	.	.	.	.	92.98;98.25	.	.	100	.	.	.	.	100	.	100	100	.	.	.	.	.	.	.	100	.	.	.	.	100	100	.	.	.	.	.	.	100	.	.	.	.	.	.
HB3-contigs.fna	3	.	.	.	.	.	.	.	.	.	.	.	.	.	.	.	.	.	.	.	100	.	.	.	.	.	.	.	100	.	.	.	.	.	.	.	.	.	.	.	.	.	.	.	.	.	.	.	.
HB30-contigs.fna	7	.	.	.	.	.	.	.	.	.	.	.	.	100.00;90.77	.	.	.	.	.	.	.	.	.	.	.	.	.	.	100	.	100	.	.	.	.	.	.	.	.	.	.	.	100	100	.	100	.	.	90.37
HB33-contigs.fna	6	.	.	.	.	.	.	.	.	.	.	.	.	.	.	.	.	.	.	.	100	.	.	.	.	.	.	.	.	.	100	.	.	.	100	100	.	.	.	.	.	.	.	.	.	.	.	.	.
HB36-contigs.fna	9	.	.	.	.	.	.	.	.	.	.	.	.	84.62	.	.	.	.	100	.	.	100	.	.	.	.	.	.	100	.	.	.	.	.	100	100	.	.	.	.	.	.	100	.	.	100	.	.	.
HB37-contigs.fna	10	.	.	.	.	.	.	.	.	.	98.25;92.98	.	.	100	.	.	.	.	100	.	100	100	.	.	.	.	.	.	.	100	.	.	.	.	100	100	.	.	.	.	.	.	100	.	.	.	.	.	.
HB38-contigs.fna	4	.	.	.	.	.	.	100	.	.	.	.	.	100	.	.	.	.	.	.	.	.	.	.	.	.	.	99.62	100	.	.	.	.	.	.	.	.	.	.	.	.	.	.	.	.	.	.	.	.
HB4-contigs.fna	6	.	.	.	.	.	.	.	.	.	.	.	.	90.77	.	.	.	.	.	.	.	.	.	.	.	.	.	.	100	.	100	.	.	.	.	.	.	.	.	.	.	.	.	100	.	100	.	.	90.37
HB42-contigs.fna	3	.	.	.	.	.	.	.	.	.	.	.	.	.	.	.	.	.	.	.	100	.	.	.	.	.	.	.	100	.	.	.	.	.	.	.	.	.	100	.	.	.	.	.	.	.	.	.	.
HB44-contigs.fna	8	.	.	.	.	.	.	.	.	.	.	.	.	100.00;100.00	.	.	.	.	.	.	100	.	.	.	.	.	.	.	100	.	100	.	.	.	100	100	.	.	100	.	.	.	.	.	.	.	.	.	.
HB45-contigs.fna	8	.	.	.	.	.	.	.	.	.	100.00;100.00	.	.	99.23;98.46	.	.	.	.	.	.	.	100	.	.	.	.	.	.	.	.	.	.	.	.	100	100	.	.	.	.	.	.	100	.	.	100	.	.	.
HB50-contigs.fna	7	.	.	.	.	.	.	.	.	.	97.37	.	.	.	.	.	.	.	100	.	.	100	.	.	.	.	.	.	100	.	.	.	.	.	.	.	.	.	.	.	100	.	.	.	.	100	.	.	.
HB53-contigs.fna	5	.	.	100	.	.	.	.	.	.	96.49	.	.	100	.	.	.	.	.	.	.	.	.	.	.	.	.	.	100	.	100	.	.	.	.	.	.	.	.	.	.	.	.	.	.	.	.	.	.
HB55-contigs.fna	3	.	.	.	.	.	.	.	.	.	100	.	.	.	.	.	.	.	.	.	.	.	.	.	.	.	.	.	.	.	.	.	.	.	.	.	.	.	.	.	100	.	.	.	.	100	.	.	.
HB6-contigs.fna	11	.	.	100	.	.	.	100	.	.	.	.	.	100.00;100.00;90.77	.	.	.	.	.	.	100	.	.	.	.	.	.	.	100	.	.	.	.	.	100	100	.	.	.	.	.	.	100.00;86.81	.	.	100	.	.	.
HB61-contigs.fna	2	.	.	.	.	.	.	.	.	.	.	.	.	.	.	.	.	.	.	.	.	.	.	.	.	.	.	.	100	.	.	.	.	.	.	.	.	.	.	.	.	.	.	.	.	.	.	.	.
HB64-contigs.fna	7	.	.	.	.	.	.	.	.	99.29	100	.	.	96.92	.	.	.	.	100	.	.	100	.	.	.	.	.	.	100	.	.	.	.	.	.	.	.	.	.	.	.	.	100	.	.	.	.	.	.
HB84-contigs.fna	5	.	.	.	.	.	.	.	.	.	.	.	.	100	.	.	.	.	.	100	100	.	.	.	.	.	.	.	.	.	100	.	.	.	.	.	.	.	.	.	.	.	.	.	.	100	.	.	.
HLJ34-contigs.fna	3	.	.	.	.	.	.	.	.	.	.	.	.	90.77	.	.	.	.	.	.	100	.	.	.	100	.	.	.	.	.	.	.	.	.	.	.	.	.	.	.	.	.	.	.	.	.	.	.	.
HLJ5-contigs.fna	3	.	.	.	.	.	.	.	.	.	.	.	.	100.00;98.46	.	.	.	.	.	.	.	.	.	.	.	.	.	.	.	.	99.62	.	.	.	.	.	.	.	.	.	.	.	.	.	.	100	.	.	.
HLJ64-contigs.fna	4	.	.	100	.	.	.	.	.	.	.	.	.	100	.	.	.	.	.	.	100	.	.	.	.	99.6	.	.	.	.	.	.	.	.	.	.	.	.	.	.	.	.	.	.	.	.	.	.	.
HN15-contigs.fna	2	.	.	.	.	.	.	.	.	.	.	.	.	.	.	.	.	.	.	100	100	.	.	.	.	.	.	.	.	.	.	.	.	.	.	.	.	.	.	.	.	.	.	.	.	.	.	.	.
HUBJ12-contigs.fna	8	.	.	.	.	.	.	.	.	.	97.37;95.61	.	100	90.77;100.00	.	.	.	.	.	.	100	.	.	.	.	99.6	.	.	100	.	.	.	.	.	.	.	.	.	.	.	100	.	.	.	.	100	.	.	.
HUBJ16-contigs.fna	6	.	.	100	.	.	.	.	.	.	97.37;96.49;100.00	.	.	100	.	.	.	.	.	98.97	100	.	.	.	.	99.8	.	.	.	.	.	.	.	.	.	.	.	.	.	.	.	.	.	.	.	.	.	.	.
HUBJ20-contigs.fna	6	.	.	89.31	.	.	.	.	.	.	97.37;96.49;100.00	.	.	100	.	.	.	.	.	98.97	100	.	.	.	.	99.8	.	.	.	.	.	.	.	.	.	.	.	.	.	.	.	.	.	.	.	.	.	.	.
HUBJ22-contigs.fna	6	.	.	.	.	.	.	.	.	.	97.37	.	.	100.00;100.00	.	.	.	.	.	.	100	.	.	.	.	.	.	.	100	.	.	.	.	.	.	.	.	.	.	.	.	.	.	100	.	100	.	.	.
HUBJ24-contigs.fna	6	.	.	88.17;88.17	.	.	.	.	.	.	96.49;97.37;100.00	.	.	100.00;100.00	.	.	.	.	.	98.97	100	.	.	.	.	99.8	.	.	.	.	.	.	.	.	.	.	.	.	.	.	.	.	.	.	.	.	.	.	.
HUBJ25-contigs.fna	2	.	.	.	.	.	.	.	.	.	.	.	.	100	.	.	.	.	.	.	.	.	.	.	.	.	.	.	.	.	.	.	.	.	.	.	.	.	.	.	.	.	100	.	.	.	.	.	.
HUBJ28-contigs.fna	3	.	.	.	.	.	.	.	.	.	.	.	.	.	.	.	.	.	.	.	100	100	.	.	.	.	.	.	.	.	.	.	.	.	.	.	.	.	.	.	.	.	.	.	.	.	.	.	.
HUBJ8-contigs.fna	4	.	.	.	.	.	.	.	.	.	100	.	.	92.31	.	.	.	.	.	.	100	.	.	.	.	99.6	.	.	.	.	.	.	.	.	.	.	.	.	.	.	.	.	.	.	.	.	.	.	.
HUBS21-contigs.fna	5	.	.	100	.	.	.	.	.	.	100	.	.	100	.	.	.	.	.	.	.	.	.	.	.	.	.	.	100	.	.	.	.	.	.	.	.	.	.	.	.	.	.	.	.	.	.	.	.
HUBS24-contigs.fna	4	.	.	.	.	.	.	.	.	.	.	.	.	100	.	.	.	.	.	.	.	.	.	100	.	.	.	.	100	.	.	.	.	.	.	.	100	.	.	.	.	.	.	.	.	.	.	.	.
HUBS28-contigs.fna	5	.	.	.	.	.	.	.	.	.	.	99.03	.	98.46	.	.	.	.	.	.	.	100	.	.	.	.	.	.	100	.	.	.	.	.	.	.	.	.	.	.	.	.	.	.	.	100	.	.	.
HUBS36-contigs.fna	5	.	.	100	.	.	.	.	.	.	.	.	.	.	.	.	.	.	.	.	100	.	.	.	.	.	.	.	100	.	.	.	.	.	.	.	100	.	.	.	.	.	.	100	.	.	.	.	.
HUBS37-contigs.fna	5	.	.	100	.	.	.	.	.	.	.	.	.	.	.	.	.	.	.	.	100	.	.	.	.	.	.	.	100	.	.	.	.	.	.	.	100	.	.	.	.	.	.	100	.	.	.	.	.
HUBS5-contigs.fna	4	.	.	.	.	.	.	.	.	.	.	.	.	100	.	.	.	.	.	98.97	100	.	.	.	.	99.8	.	.	.	.	.	.	.	.	.	.	.	.	.	.	.	.	.	.	.	.	.	.	.
HUN101-contigs.fna	4	.	.	.	.	.	.	.	.	.	.	.	.	.	.	.	.	.	99.74	.	.	.	.	.	.	.	.	.	.	.	.	.	.	.	.	.	100	.	.	.	.	.	100	100	.	.	.	.	.
HUN103-contigs.fna	4	.	.	.	.	.	.	.	.	.	.	.	.	.	.	.	.	.	.	93.56	100	.	.	.	.	99.6	.	.	.	.	.	.	.	.	.	.	100	.	.	.	.	.	.	.	.	.	.	.	.
HUN105-contigs.fna	5	.	.	.	.	.	.	.	.	.	.	.	.	.	.	.	.	.	.	.	100	.	.	.	.	99.6	.	.	.	.	.	.	.	.	.	.	.	.	.	.	.	100	100	.	.	100	.	.	.
HUN107-contigs.fna	7	.	.	98.85	.	.	.	100	.	.	.	.	.	.	.	.	.	.	.	93.56	100	.	.	.	.	99.6	.	.	.	.	.	.	.	.	.	.	.	.	.	.	.	.	.	.	.	100	.	.	90.37
HUN108-contigs.fna	6	.	.	.	.	.	.	.	.	.	.	.	100	.	.	.	.	.	.	.	100	.	.	.	.	99.6	.	.	100	.	.	.	.	.	.	.	.	.	.	.	100	.	100	.	.	.	.	.	.
HUN109-contigs.fna	6	.	.	100	.	.	.	.	.	.	.	.	.	100.00;90.77	.	.	.	100	.	.	100	.	.	.	.	99.6	.	.	.	.	.	.	.	.	.	.	.	.	.	.	.	.	.	.	.	.	.	.	.
HUN11-contigs.fna	7	.	.	.	.	.	.	.	.	.	.	.	.	100	.	.	.	.	.	.	100	.	.	.	.	.	.	.	.	.	100	.	.	.	100	100	.	.	.	.	.	.	.	.	.	.	.	.	.
HUN111-contigs.fna	3	.	.	.	.	.	.	.	.	.	.	.	.	.	.	.	.	.	.	.	100	.	.	.	.	99.6	.	.	.	.	.	.	.	.	.	.	.	.	.	.	.	.	.	.	.	100	.	.	.
HUN112-contigs.fna	8	.	.	.	.	.	.	.	.	99.29	.	.	.	96.92	.	.	.	.	100	.	.	.	.	.	.	.	.	.	.	.	.	100	100	.	.	.	.	.	.	.	.	98.52	.	.	.	100	.	.	.
HUN113-contigs.fna	6	.	.	.	.	.	.	.	.	.	.	.	100	.	.	.	.	.	100	.	.	100	.	.	.	.	.	.	.	.	.	.	.	.	.	.	.	.	.	.	.	.	100	.	.	100.00;100.00	.	.	90.37
HUN115-contigs.fna	7	.	.	100	.	.	.	.	.	.	.	.	.	.	.	.	.	.	.	.	.	.	.	.	.	.	.	100	.	.	.	.	.	.	100	100	.	.	.	.	.	.	100	.	.	100	.	.	.
HUN127-contigs.fna	6	.	.	.	.	.	.	.	.	.	.	.	.	.	.	.	.	.	100	93.56	100	.	.	.	.	99.6	.	.	.	.	.	100	100	.	.	.	.	.	.	.	.	.	.	.	.	.	.	.	.
HUN128-contigs.fna	6	.	.	.	.	.	.	.	.	.	.	.	.	100	.	.	.	.	.	100	100	.	.	.	.	.	.	.	.	.	100	.	.	.	.	.	.	.	.	.	.	.	.	.	.	100	.	.	.
HUN129-contigs.fna	4	.	.	.	.	.	.	.	.	.	.	.	.	100	.	.	.	.	.	.	100	.	.	.	.	99.6	.	.	.	.	.	.	.	.	.	.	.	.	.	.	.	.	100	.	.	.	.	.	.
HUN13-contigs.fna	4	.	.	.	.	.	.	.	.	.	.	.	.	84.62;90.77	.	.	.	.	.	.	.	.	.	.	.	.	.	.	.	.	.	.	.	.	100	100	.	.	.	.	.	.	.	.	.	.	.	.	.
HUN14-contigs.fna	3	.	.	.	.	.	.	.	.	.	.	.	.	.	.	.	.	.	.	.	.	.	.	.	.	.	.	.	.	.	.	.	.	.	100	100	.	.	.	.	.	.	.	.	.	.	.	.	.
HUN15-contigs.fna	6	.	.	.	.	.	.	.	.	.	100	.	.	100	.	.	.	.	.	.	.	.	.	.	.	.	.	.	.	.	.	.	.	.	100	100	.	.	.	.	.	.	.	.	.	.	.	.	.
HUN16-contigs.fna	5	.	.	.	.	.	.	.	.	.	.	.	.	.	.	.	.	.	.	.	.	.	.	.	.	99.6	.	.	.	.	.	.	.	.	100	100	.	.	.	.	.	.	.	100	.	.	.	.	.
HUN18-contigs.fna	6	.	.	100	.	.	.	.	.	.	99.12;95.61	.	.	.	.	.	.	.	.	93.3	100	.	.	.	.	100	.	.	.	.	.	.	.	.	.	.	.	.	.	.	.	.	.	.	.	100	.	.	.
HUN19-contigs.fna	5	.	.	.	.	.	.	.	.	.	.	.	100	.	.	.	.	.	.	100	100	.	.	.	.	.	.	.	.	.	100	.	.	.	.	.	.	.	.	.	.	.	.	.	.	100	.	.	.
HUN20-contigs.fna	6	.	.	.	.	.	.	.	.	.	.	99.03	.	.	100	.	.	.	.	.	.	.	.	.	.	.	.	.	.	.	.	.	.	.	100	100	.	.	.	.	.	.	.	.	.	.	.	.	.
HUN23-contigs.fna	8	.	.	.	.	.	100	.	.	.	100.00;96.49;97.37	.	.	.	.	.	.	.	.	.	.	.	.	.	.	.	.	.	.	.	.	.	.	.	100	100	.	.	.	.	.	.	100	100	.	100	.	.	.
HUN24-contigs.fna	6	.	.	.	.	.	.	.	.	.	.	.	.	.	.	.	.	.	.	.	.	.	.	.	.	99.6	.	.	.	.	.	.	.	.	100	100	.	.	.	.	.	.	.	100	.	100	.	.	.
HUN26-contigs.fna	8	.	.	.	.	.	.	.	.	.	.	.	.	100	.	100	.	100	.	93.56	100	.	.	.	.	99.6	.	.	.	.	.	.	.	.	.	.	.	.	.	.	.	.	84.67	.	.	.	.	.	.
HUN27-contigs.fna	3	.	.	.	.	.	.	.	.	.	.	.	.	.	.	.	.	.	.	.	100	.	.	.	.	99.6	.	.	.	.	.	.	.	.	.	.	.	.	.	.	.	.	.	.	.	.	.	.	.
HUN29-contigs.fna	3	.	.	.	.	.	.	.	.	.	.	.	.	.	.	.	.	.	.	.	100	.	.	.	.	99.6	.	.	.	.	.	.	.	.	.	.	.	.	.	.	.	.	.	.	.	.	.	.	.
HUN38-contigs.fna	8	.	.	.	.	.	.	.	.	99.29	.	.	.	100.00;96.92	.	.	.	.	.	.	.	.	.	.	.	.	.	.	.	.	.	.	.	.	100	100	.	.	.	.	.	.	100	.	.	100	.	.	.
HUN39-contigs.fna	3	.	.	.	.	.	.	.	.	.	.	.	.	100.00;100.00	.	.	.	.	.	.	.	.	.	.	.	99.6	.	.	.	.	.	.	.	.	.	.	.	.	.	.	.	.	.	100	.	.	.	.	.
HUN4-contigs.fna	4	.	.	.	.	.	.	.	.	.	.	.	.	.	.	.	.	.	.	.	.	.	.	.	.	.	.	.	.	.	.	.	.	.	100	100	.	.	.	.	.	.	.	.	.	.	.	.	.
HUN45-contigs.fna	5	.	.	98.85	.	.	.	.	.	.	.	.	.	.	.	.	.	.	.	100	.	.	.	.	.	.	.	.	100	.	.	.	.	.	.	.	100	.	.	.	.	.	.	.	.	100	.	.	.
HUN49-contigs.fna	4	.	.	.	.	.	.	.	.	.	.	.	.	.	.	.	.	.	100	.	.	.	.	.	100	.	.	.	.	.	.	100	100	.	.	.	.	.	.	.	.	.	.	.	.	.	.	.	.
HUN50-contigs.fna	7	.	.	100	.	.	.	.	.	.	99.12	.	.	100	.	.	.	.	.	93.3	100	.	.	.	.	100	.	.	.	.	.	.	.	.	.	.	.	.	.	.	.	.	.	.	.	100	.	.	.
HUN56-contigs.fna	5	.	.	98.85	.	.	.	.	.	.	.	.	.	.	.	.	.	.	.	100	.	.	.	.	.	.	.	.	100	.	.	.	.	.	.	.	100	.	.	.	.	.	.	.	.	100	.	.	.
HUN58-contigs.fna	7	.	.	.	.	.	.	.	.	.	.	.	.	100	.	.	.	.	.	.	100	.	.	.	.	.	.	.	.	.	100	.	.	.	100	100	.	.	.	.	.	.	.	.	.	.	.	.	.
HUN59-contigs.fna	8	.	.	.	.	.	.	.	.	.	.	.	.	100	.	.	.	.	.	.	100	.	.	.	.	.	.	.	.	.	100	.	.	.	100	100	.	.	.	97.16	.	.	.	.	.	.	.	.	.
HUN7-contigs.fna	5	.	.	.	.	.	.	.	.	.	.	.	.	.	.	.	.	.	.	.	.	.	.	.	100	.	.	.	.	.	.	.	.	.	100	100	.	.	.	.	.	.	.	.	.	.	.	.	.
HUN71-contigs.fna	4	.	.	.	.	.	.	.	.	.	.	.	.	.	.	.	.	.	.	.	100	.	.	.	.	99.6	.	.	.	.	.	.	.	.	.	.	.	.	.	.	.	.	100	.	.	100	.	.	.
HUN72-contigs.fna	9	.	.	.	.	.	.	.	.	.	.	.	100	100	.	.	.	.	.	93.56	100	.	.	.	.	99.6	.	.	100	.	.	.	.	.	.	.	100	.	.	.	.	.	.	.	.	100	.	.	.
HUN75-contigs.fna	10	.	.	.	.	.	.	.	.	.	.	.	.	100	.	.	.	.	100	100	100	.	.	.	.	.	.	.	.	.	100	100	100	.	.	.	100	.	.	.	.	.	.	.	.	100	.	.	.
HUN77-contigs.fna	4	.	.	100	.	.	.	.	.	.	.	.	.	100	.	.	.	.	.	.	100	.	.	.	.	99.6	.	.	.	.	.	.	.	.	.	.	.	.	.	.	.	.	.	.	.	.	.	.	.
HUN78-contigs.fna	6	.	.	.	.	.	.	.	.	.	96.49	.	.	.	.	.	.	.	.	93.56	100	.	.	.	.	99.6	.	.	.	.	.	.	.	.	.	.	.	.	.	.	.	.	100	.	.	100	.	.	.
HUN8-contigs.fna	4	.	.	.	.	.	.	.	.	.	.	.	.	.	.	.	.	.	.	.	.	.	.	.	.	.	.	.	.	.	.	.	.	.	100	100	.	.	.	.	.	.	.	.	.	.	.	.	.
HUN80-contigs.fna	5	.	.	98.47	.	.	.	.	.	99.29	100	.	.	100.00;92.31	.	.	.	.	.	.	.	.	.	.	.	.	.	.	.	.	.	.	.	.	.	.	.	.	.	.	.	.	100	.	.	.	.	.	.
HUN82-contigs.fna	6	.	.	.	.	.	.	.	.	.	100	.	.	.	.	.	.	.	100	.	.	.	.	.	.	.	.	.	.	.	.	100	100	.	.	.	.	.	.	.	.	.	100	.	.	.	.	.	.
HUN83-contigs.fna	6	.	.	.	.	.	.	.	.	.	.	.	100	98.46	.	.	.	.	.	.	.	.	.	.	.	.	.	.	100	.	.	.	.	.	.	.	.	.	.	.	100	.	.	100	.	100	.	.	.
HUN84-contigs.fna	4	.	.	.	.	.	.	.	.	.	100	.	.	.	.	.	.	.	.	.	100	.	.	.	.	.	.	.	.	.	100	.	.	.	.	.	.	.	.	.	.	.	.	.	.	100	.	.	.
HUN89-contigs.fna	6	.	.	.	.	.	.	.	.	.	.	.	.	100	.	.	.	.	.	98.97	100	.	.	.	.	99.8	.	.	.	.	.	.	.	.	.	.	.	.	.	.	.	.	100	.	.	.	.	.	.
HUN9-contigs.fna	13	.	.	100	.	.	.	.	.	99.29	.	99.03	100	90.77;100.00;100.00	.	.	.	.	.	100	100	.	.	.	.	.	.	.	.	.	100	.	.	.	100	100	.	.	.	.	.	.	100	.	.	100	.	.	.
HUN92-contigs.fna	4	.	.	.	.	.	.	.	.	.	100	.	.	.	.	.	.	.	.	.	100	.	.	.	.	99.6	.	.	.	.	.	.	.	.	.	.	.	.	.	.	.	.	100	.	.	.	.	.	.
HUN94-contigs.fna	2	.	.	.	.	.	.	.	.	.	.	.	.	100	.	.	.	.	.	.	.	.	.	.	.	.	.	100	.	.	.	.	.	.	.	.	.	.	.	.	.	.	.	.	.	.	.	.	.
HUNJ27-contigs.fna	3	.	.	100	.	.	.	.	.	.	.	.	.	.	.	.	.	.	.	.	100	.	.	.	.	99.6	.	.	.	.	.	.	.	.	.	.	.	.	.	.	.	.	.	.	.	.	.	.	.
HUNS32-contigs.fna	3	.	.	.	.	.	.	.	.	.	100	.	.	.	.	.	.	.	.	.	100	.	.	.	.	99.6	.	.	.	.	.	.	.	.	.	.	.	.	.	.	.	.	.	.	.	.	.	.	.
HUNS33-contigs.fna	4	.	.	.	.	.	.	.	.	.	.	.	.	100	.	.	.	.	.	.	.	.	.	100	.	.	.	.	100	.	.	.	.	.	.	.	100	.	.	.	.	.	.	.	.	.	.	.	.
HUNS34-contigs.fna	4	.	.	.	.	.	.	.	.	.	.	.	.	90.77	.	.	.	.	.	.	100	.	.	.	.	.	.	99.62	.	.	.	.	.	.	.	.	.	.	.	.	.	.	.	.	.	.	.	.	100
HUNS46-contigs.fna	6	.	.	.	.	.	.	.	.	.	.	.	.	.	.	.	.	.	100	.	.	.	.	.	.	.	.	.	.	.	.	100	100	.	.	.	.	.	.	.	.	.	100	.	.	.	.	100	.
HUNS48-contigs.fna	1	.	.	.	.	.	.	.	.	.	.	.	.	.	.	.	.	.	.	.	.	100	.	.	.	.	.	.	.	.	.	.	.	.	.	.	.	.	.	.	.	.	.	.	.	.	.	.	.
JL33-contigs.fna	4	.	.	.	.	.	.	.	.	.	.	.	.	.	100	.	.	.	.	.	100	.	.	.	.	99.6	.	.	.	.	.	.	.	.	.	.	.	.	.	.	.	.	.	.	.	.	.	.	.
JS77-contigs.fna	4	.	.	.	.	.	.	.	.	.	.	.	.	100.00;100.00	.	.	.	.	.	100	100	.	.	.	.	.	.	.	.	100	.	.	.	.	.	.	.	.	.	.	.	.	.	.	.	.	.	.	.
JX10-contigs.fna	5	.	.	.	.	.	.	.	.	.	.	.	.	.	.	.	.	.	.	.	.	100	.	.	.	.	.	.	.	.	.	.	.	.	100	100	.	.	.	.	.	.	.	.	.	100	.	.	.
JX12-contigs.fna	4	.	.	.	.	.	.	.	.	.	.	.	.	.	.	.	.	.	100	.	.	100	.	.	.	.	.	.	.	.	100	.	.	.	.	.	.	.	.	.	.	.	.	.	.	.	.	.	.
JX13-contigs.fna	5	.	.	.	.	.	.	.	.	.	.	.	.	100	98.96	.	.	.	100	.	.	100	.	.	.	.	.	.	.	.	.	.	.	.	.	.	.	.	.	.	.	.	.	.	.	100	.	.	.
JX16-contigs.fna	5	.	.	.	.	.	.	.	.	.	.	.	.	100	98.96	.	.	.	100	.	.	100	.	.	.	.	.	.	.	.	.	.	.	.	.	.	.	.	.	.	.	.	.	.	.	100	.	.	.
JX18-contigs.fna	10	.	.	.	.	.	.	.	.	.	.	.	.	100	.	.	.	.	.	.	.	.	.	.	100	.	.	.	.	.	100	.	.	.	100	100	.	.	.	.	.	.	.	100	.	100	.	.	90.37
JX21-contigs.fna	6	.	.	100	.	.	.	.	.	.	.	.	.	90.77	.	.	.	.	.	.	100	.	.	.	.	99.6	.	.	.	.	.	.	.	.	.	.	.	.	.	.	.	.	100	.	.	.	.	.	100
JX23-contigs.fna	2	.	.	.	.	.	.	.	.	.	.	.	.	.	.	.	.	.	.	.	100	.	.	.	.	99.6	.	.	.	.	.	.	.	.	.	.	.	.	.	.	.	.	.	.	.	.	.	.	.
JX25-contigs.fna	6	.	.	.	.	.	.	100	.	.	100	.	.	100	.	.	.	.	.	.	100	.	.	.	.	.	.	.	100	.	88.12	.	.	.	.	.	.	.	.	.	.	.	.	.	.	.	.	.	.
JX26-contigs.fna	3	.	.	.	.	.	.	.	.	.	.	.	.	.	.	.	.	.	.	.	.	.	.	.	.	.	.	.	100	.	.	.	.	.	.	.	.	.	.	.	.	.	.	.	.	100	.	.	.
JX38-contigs.fna	2	.	.	.	.	.	.	.	.	.	.	.	.	.	.	.	.	.	.	.	100	.	.	.	.	.	.	.	.	.	.	.	.	.	.	.	.	.	.	.	.	.	.	.	.	.	.	.	.
JX39-contigs.fna	5	.	.	.	.	.	.	.	.	.	96.49;100.00	.	.	100.00;100.00	.	.	.	.	.	98.97	100	.	.	.	.	99.8	.	.	.	.	.	.	.	.	.	.	.	.	.	.	.	.	.	.	.	.	.	.	.
JX4-contigs.fna	8	.	.	.	.	.	.	.	.	.	100	.	.	100	.	.	.	.	.	.	100	.	.	.	.	99.6	.	.	.	.	.	.	.	.	.	.	.	.	.	.	.	.	100	.	.	100	.	.	90.37
JX40-contigs.fna	7	.	.	.	.	.	.	.	.	.	100	.	.	.	.	.	.	.	100	.	.	100	.	.	.	.	.	.	100	.	.	.	.	.	.	.	.	.	.	.	.	.	100	.	.	100.00;100.00	.	.	90.37
JX42-contigs.fna	7	.	.	.	.	.	.	.	.	.	100	.	.	100	.	.	.	.	.	.	100	.	.	.	.	99.6	.	.	.	.	.	.	.	.	.	.	.	.	.	.	.	.	100	.	.	100	.	.	90.37
JX45-contigs.fna	7	.	.	.	.	.	.	.	.	.	100	.	.	.	.	.	.	.	.	.	100	.	.	.	.	99.6	.	100	.	.	.	.	.	.	.	.	.	.	.	.	.	.	.	.	.	100	.	.	90.37
LN10-contigs.fna	6	.	.	.	.	.	.	.	.	.	.	.	.	100.00;90.77	.	.	.	.	100	.	.	100	.	.	.	.	.	.	100	.	99.62	.	.	.	.	.	.	.	.	.	.	.	.	.	.	100	.	.	.
LN13-contigs.fna	6	.	.	.	.	.	.	.	.	.	.	.	.	.	.	.	.	.	.	100	.	.	.	.	.	.	.	.	.	.	100	.	.	.	100	100	.	.	.	.	.	.	.	.	.	.	100	.	.
LN32-contigs.fna	6	.	.	.	.	.	.	.	.	.	.	.	.	90.77;100.00	.	.	.	.	100	.	.	100	.	.	.	.	.	.	100	.	99.62	.	.	.	.	.	.	.	.	.	.	.	.	.	.	100	.	.	.
LN35-contigs.fna	5	.	.	.	.	.	.	.	.	99.29	.	.	.	100	.	.	.	.	.	.	.	.	.	.	.	.	.	.	.	.	.	.	.	.	.	.	.	.	.	.	99.81	.	.	.	.	100	.	.	.
LN36-contigs.fna	1	.	.	.	.	.	.	.	.	.	.	.	.	.	.	.	.	.	.	.	.	100	.	.	.	.	.	.	.	.	.	.	.	.	.	.	.	.	.	.	.	.	.	.	.	.	.	.	.
LN42-contigs.fna	9	.	.	.	.	.	.	.	.	.	96.49;98.25;100.00	.	.	.	.	.	.	.	.	.	100	.	.	.	100	99.6	.	.	.	.	.	.	.	.	100	100	.	.	.	.	100	.	.	100	.	.	.	.	.
LN43-contigs.fna	9	.	.	.	.	.	.	.	.	.	.	.	.	83.85;100.00	.	.	.	.	.	.	.	.	.	.	.	99.6	.	.	.	.	.	.	.	.	100	100	100	.	.	.	94.75	.	.	100	.	100	.	.	.
LN44-contigs.fna	5	.	.	98.47	.	.	.	.	.	.	.	.	.	92.31	.	.	.	.	100	.	.	100	.	.	.	.	.	.	100	.	.	.	.	.	.	.	.	.	.	.	.	.	.	.	.	.	.	.	.
LN59-contigs.fna	6	.	.	.	.	.	.	.	.	.	.	.	.	.	.	.	.	.	.	100	.	.	.	.	.	.	.	.	.	.	100	.	.	.	100	100	.	.	.	.	.	.	.	.	.	.	100	.	.
LN62-contigs.fna	5	.	.	100	.	.	.	.	.	.	.	.	.	.	.	.	.	.	.	.	100	.	.	.	.	99.6	.	.	.	.	.	.	.	.	.	.	100	.	.	.	.	.	.	.	.	.	.	.	.
LN64-contigs.fna	7	.	.	100	.	.	.	.	.	.	.	.	.	92.31	.	.	.	.	.	93.56	100	.	.	.	.	99.6	.	.	.	.	.	.	.	.	.	.	.	.	.	.	.	.	.	.	.	100	.	.	.
LN69-contigs.fna	3	.	.	.	.	.	.	.	.	.	.	.	.	.	.	.	.	.	.	93.56	100	.	.	.	.	99.6	.	.	.	.	.	.	.	.	.	.	.	.	.	.	.	.	.	.	.	.	.	.	.
LN73-contigs.fna	6	.	.	.	.	.	.	.	.	.	.	.	.	98.46	.	.	.	.	.	.	100	.	.	.	.	99.6	.	.	.	.	.	.	.	.	.	.	.	.	.	.	.	.	100	.	.	100	.	.	90.37
LN74-contigs.fna	5	.	.	.	.	.	.	.	.	.	.	.	.	100	.	.	.	.	.	.	100	.	.	.	.	99.6	.	.	.	.	.	.	.	.	.	.	.	.	.	.	.	.	100	.	.	100	.	.	.
LN75-contigs.fna	5	.	.	.	.	.	.	.	.	.	.	.	.	100	.	.	.	.	.	.	100	.	.	.	.	99.6	.	.	.	.	.	.	.	.	.	.	.	.	.	.	.	.	100	.	.	100	.	.	.
NMG10-contigs.fna	2	.	.	.	.	.	.	.	.	.	.	.	.	.	.	.	.	.	.	.	.	.	.	.	.	.	.	.	100	.	.	.	.	.	.	.	.	.	.	.	.	.	.	.	.	.	.	.	.
NMG12-contigs.fna	4	.	.	.	.	.	.	.	.	.	.	.	.	100	.	.	.	.	.	.	.	.	.	.	.	.	.	.	100	.	.	.	.	.	.	.	.	.	.	.	.	.	.	.	.	100	.	.	.
NMG22-contigs.fna	7	.	.	100.00;99.24	.	.	.	.	.	.	.	.	.	.	.	.	.	.	.	100	.	.	.	.	.	.	.	.	100	.	100	.	.	.	.	.	100	.	.	.	.	.	.	100	.	.	.	.	.
NMG24-contigs.fna	11	.	.	98.47	.	.	.	100	.	.	.	.	.	.	.	.	.	.	.	93.56	100	.	.	.	.	99.6	.	.	.	100	.	.	.	.	100	100	100	.	.	.	.	.	100	.	.	.	.	.	.
NMG25-contigs.fna	7	.	.	100	.	.	.	.	.	.	.	.	.	.	.	.	.	.	.	.	100	.	.	.	.	.	.	.	100	.	.	.	.	.	.	.	.	.	.	97.16	84.24	.	100	.	.	.	.	.	.
NMG29-contigs.fna	12	.	.	100	.	.	.	100	.	.	.	.	.	100	.	.	.	.	.	100	100	.	.	.	.	.	.	.	.	.	100	.	.	.	100	100	.	.	.	.	.	.	100	.	.	100	.	.	.
NMG3-contigs.fna	10	.	.	.	.	.	.	.	.	.	.	.	100	100.00;100.00	.	.	.	.	.	.	.	.	.	.	.	.	.	.	100	.	.	.	.	.	100	100	.	.	.	.	100	.	100	100	.	100	.	.	.
NMG32-contigs.fna	12	.	.	100	.	.	.	.	.	.	.	.	.	86.15;98.46	.	.	.	.	.	100	100	.	.	.	.	.	.	.	.	.	100	.	.	.	100	100	.	.	.	97.16	.	.	100	.	.	100	.	.	.
NMG39-contigs.fna	7	.	.	.	.	.	.	.	.	.	.	.	100	99.23	.	.	.	.	.	.	.	.	.	.	.	.	.	.	100	.	.	.	.	.	.	.	.	.	.	97.16	100	.	100	.	.	.	.	.	.
NMG42-contigs.fna	4	.	.	.	.	.	.	.	.	.	.	.	.	92.31;100.00	.	.	.	.	.	.	.	.	.	.	.	.	.	.	100	.	.	.	.	.	.	.	.	.	.	.	.	.	100	.	.	100	.	.	.
NMG46-contigs.fna	13	.	.	98.47	.	.	.	.	.	.	.	.	100	.	.	.	.	.	100	.	.	100	.	.	.	.	.	100	100	.	.	.	.	.	100	100	.	.	.	97.16	100	.	100	.	.	100	.	.	.
NMG47-contigs.fna	10	.	.	99.24	.	.	.	100	.	.	.	.	100	98.46;100.00;100.00	.	.	.	.	.	.	.	.	.	.	.	99.6	.	.	100	.	.	.	.	.	.	.	.	.	.	.	100	.	100	100	.	.	.	.	.
NMG48-contigs.fna	7	.	.	100	.	.	.	.	.	.	.	.	.	100	.	.	.	.	.	.	.	.	.	.	.	.	.	.	100	.	.	.	.	.	100	.	.	.	.	97.16	.	.	100	.	.	.	.	.	.
NMG49-contigs.fna	11	.	.	.	.	.	.	100	.	.	100.00;96.49	87.44	100	98.46;100.00	.	.	.	.	.	.	.	.	.	.	.	99.6	.	.	100	.	.	.	.	.	.	.	.	.	.	.	100	.	100	100	.	.	.	.	.
NMG5-contigs.fna	9	.	.	92.75	.	.	.	.	.	.	.	.	.	100	.	.	.	98.12	.	.	.	.	.	.	.	.	.	.	.	.	.	.	.	.	100	100	.	.	.	.	.	.	100	100	.	100	.	.	.
NMG50-contigs.fna	11	.	.	.	.	.	.	100	.	.	96.49;100.00	87.44	100	98.46;100.00	.	.	.	.	.	.	.	.	.	.	.	99.6	.	.	100	.	.	.	.	.	.	.	.	.	.	.	100	.	100	100	.	.	.	.	.
NMG6-contigs.fna	3	.	.	.	.	.	.	.	.	.	.	.	.	90.77;92.31	.	.	.	.	.	.	.	.	.	.	.	.	.	.	100	.	.	.	.	.	.	.	.	.	.	.	.	.	.	.	.	100	.	.	.
NMG7-contigs.fna	10	.	.	96.18	.	.	.	.	.	100	.	99.03	.	100.00;100.00;98.46	.	.	.	.	.	.	100	.	.	.	100	.	.	.	100.00;100.00	.	.	.	.	.	.	.	100	.	.	.	.	.	.	.	.	100	.	.	.
NMG8-contigs.fna	8	.	.	.	.	.	.	.	.	.	.	.	.	100	.	.	.	98.12	.	.	.	.	.	.	.	.	.	.	.	.	.	.	.	.	100	100	.	.	.	.	.	.	100	100	.	100	.	.	.
NMG9-contigs.fna	10	.	.	.	.	.	.	.	.	.	.	.	100	100.00;100.00	.	.	.	.	.	.	.	.	.	.	.	.	.	.	100	.	.	.	.	.	100	100	.	.	.	.	100	.	100	100	.	100	.	.	.
NX2-contigs.fna	7	100	.	.	.	.	.	.	.	.	.	.	.	100.00;100.00	.	.	.	100	.	.	.	100	.	.	.	.	.	.	.	.	100	.	.	.	.	.	.	.	.	.	.	.	100	.	.	100	.	.	.
NX28-contigs.fna	6	.	.	.	.	.	.	.	.	99.29	.	.	.	96.92	.	.	.	.	.	.	.	.	.	.	.	.	.	.	.	.	100	.	.	.	.	.	.	.	.	.	.	.	100	.	.	100	.	.	.
QH1-contigs.fna	5	.	.	.	.	.	.	.	.	.	.	.	.	90.77	.	.	.	.	.	.	100	.	.	.	.	99.6	.	.	.	.	.	.	.	.	.	.	.	.	.	.	.	.	100	.	.	.	.	.	.
QH10-contigs.fna	5	100	.	.	.	.	.	.	.	.	.	.	100	100	.	.	.	.	.	.	.	.	.	.	100	.	.	.	.	.	.	.	.	.	.	.	.	.	.	.	.	.	.	.	.	100	.	.	.
QH12-contigs.fna	2	.	.	.	.	.	.	.	.	.	.	.	.	.	.	.	.	.	.	.	100	.	.	.	.	99.6	.	.	.	.	.	.	.	.	.	.	.	.	.	.	.	.	.	.	.	.	.	.	.
QH13-contigs.fna	4	.	.	.	.	.	.	.	.	.	.	.	.	.	.	.	.	.	.	100	100	.	.	.	.	.	.	.	.	.	.	.	.	.	.	.	.	.	.	.	.	.	100	.	.	100	.	.	.
QH17-contigs.fna	5	.	.	.	.	.	.	.	.	.	.	.	.	90.77	.	.	.	.	.	.	100	.	.	.	.	99.6	.	.	.	.	.	.	.	.	.	.	.	.	.	.	.	.	100	.	.	.	.	.	.
QH18-contigs.fna	4	.	.	.	.	.	.	.	.	.	.	.	.	.	.	.	.	.	.	100	100	.	.	.	.	.	.	.	.	.	100	.	.	.	.	.	.	.	100	.	.	.	.	.	.	.	.	.	.
QH2-contigs.fna	4	.	.	.	.	.	.	.	.	.	.	.	.	.	.	.	.	.	.	.	100	.	.	.	.	.	.	.	.	.	.	.	.	.	.	.	.	.	.	.	.	.	.	.	.	100	.	.	.
QH3-contigs.fna	2	.	.	.	.	.	.	.	.	.	.	.	.	.	.	.	.	.	.	.	100	.	.	.	.	99.6	.	.	.	.	.	.	.	.	.	.	.	.	.	.	.	.	.	.	.	.	.	.	.
QH4-contigs.fna	3	.	.	98.47	.	.	.	.	.	.	.	.	.	.	.	.	.	.	.	.	100	.	.	.	.	99.6	.	.	.	.	.	.	.	.	.	.	.	.	.	.	.	.	.	.	.	.	.	.	.
QH5-contigs.fna	2	.	.	.	.	.	.	.	.	.	.	.	.	.	.	.	.	.	.	.	100	.	.	.	.	99.6	.	.	.	.	.	.	.	.	.	.	.	.	.	.	.	.	.	.	.	.	.	.	.
QH6-contigs.fna	5	100	.	.	.	.	.	.	.	.	.	.	100	100	.	.	.	.	.	.	.	.	.	.	100	.	.	.	.	.	.	.	.	.	.	.	.	.	.	.	.	.	.	.	.	100	.	.	.
QH7-contigs.fna	4	.	.	.	.	.	.	.	.	.	.	.	.	.	.	.	.	.	.	.	100	.	.	.	.	.	.	.	.	.	.	.	.	.	.	.	.	.	.	.	.	.	.	.	.	100	.	.	.
QH8-contigs.fna	7	100	.	.	.	.	.	.	.	.	.	.	100	100	.	.	.	.	.	.	100	.	.	.	100	99.6	.	.	.	.	.	.	.	.	.	.	.	.	.	.	.	.	.	.	.	100	.	.	.
QH9-contigs.fna	7	100	.	.	.	.	.	.	.	.	.	.	100	100	.	.	.	.	.	.	100	.	.	.	100	99.6	.	.	.	.	.	.	.	.	.	.	.	.	.	.	.	.	.	.	.	100	.	.	.
S103-contigs.fna	4	.	.	.	.	.	.	100	.	.	.	.	.	.	.	.	.	.	.	.	100	.	.	.	.	99.6	.	.	100	.	.	.	.	.	.	.	.	.	.	.	.	.	.	.	.	.	.	.	.
S104-contigs.fna	7	.	.	100.00;100.00	.	.	.	100	.	.	.	.	.	100	.	.	.	.	.	.	.	.	.	.	.	.	.	.	100	.	.	.	.	.	100	100	.	.	.	.	.	.	.	.	.	.	.	.	.
S147-contigs.fna	5	.	.	.	.	.	.	.	.	.	.	.	.	98.46	.	.	.	.	.	.	.	100	.	.	.	.	.	.	100	.	.	.	.	.	.	.	.	.	.	.	.	.	.	.	.	100	.	.	.
S158-contigs.fna	3	.	.	.	.	.	.	.	.	.	.	.	.	.	.	.	.	.	.	.	.	.	.	.	.	99.6	.	.	.	.	.	.	.	.	.	.	.	.	.	.	.	.	.	100	.	100	.	.	.
S180-contigs.fna	7	.	.	99.24;98.47	.	.	.	100	.	.	.	.	.	.	.	.	.	.	.	100	100	.	.	.	.	.	.	.	.	.	100	.	.	.	.	.	.	.	.	.	.	.	100	.	.	.	.	.	100
S181-contigs.fna	9	.	.	100	.	.	.	.	100	.	96.49	.	.	.	.	.	.	.	100	.	100	100	.	.	.	99.6	.	.	.	.	.	.	.	.	.	.	.	.	.	.	.	.	.	.	.	100	.	.	100
S182-contigs.fna	6	.	.	99.24	.	.	.	.	.	.	.	99.03	.	.	.	.	.	.	.	.	.	.	.	.	.	.	.	.	.	.	.	.	.	.	.	.	.	.	.	.	100	.	.	.	.	100	.	.	100
S191-contigs.fna	7	.	.	.	.	.	.	.	.	.	.	.	.	.	.	.	.	.	100	.	.	100	100	.	.	.	.	.	.	.	.	.	.	100	.	.	.	.	.	.	.	.	.	.	.	100.00;100.00	.	.	90.37
S192-contigs.fna	8	.	.	.	.	100	.	.	.	.	.	.	.	100.00;100.00	.	.	.	.	100	.	.	100	100	.	.	.	.	.	.	.	.	.	.	100	.	.	.	.	.	.	.	.	.	.	.	100	.	.	90.37
S193-contigs.fna	7	.	.	.	.	.	.	.	.	.	.	.	.	100	.	.	.	.	.	.	100	.	.	.	.	99.6	.	.	.	.	.	.	.	.	100	100	.	.	.	.	100	.	.	.	.	.	.	.	.
S194-contigs.fna	8	.	.	.	.	.	.	.	.	.	.	.	.	100.00;100.00	.	.	.	.	100	.	.	100	.	.	.	.	.	99.62	.	.	.	.	.	.	100	100	100	.	.	.	.	.	.	.	.	.	.	.	.
S195-contigs.fna	8	.	.	99.24;100.00	.	.	.	.	.	.	.	.	.	100.00;100.00;100.00	.	.	.	.	.	.	.	100	.	.	.	.	.	.	100	.	.	.	.	.	100	100	.	.	.	.	100	.	.	.	.	.	.	.	.
S196-contigs.fna	7	.	.	.	.	.	.	.	.	.	.	.	.	100	.	.	.	.	.	100	100	.	100	.	.	.	.	.	.	.	100	.	.	100	.	.	.	.	.	.	.	.	.	.	.	.	.	.	90.37
S198-contigs.fna	8	.	.	.	.	100	.	.	.	.	.	.	.	100.00;100.00	.	.	.	.	100	.	.	100	100	.	.	.	.	.	.	.	.	.	.	100	.	.	.	.	.	.	.	.	.	.	.	100	.	.	90.37
S199-contigs.fna	6	.	.	100	.	.	.	100	.	.	.	.	.	100.00;100.00;100.00;100.00	.	.	.	.	.	.	100	.	.	.	.	.	.	.	100	.	.	.	.	.	.	.	.	.	100	.	.	.	.	.	.	.	.	.	.
S200-contigs.fna	7	.	.	99.24	.	.	.	.	.	.	.	99.03	.	100	.	.	.	.	.	.	.	.	.	.	.	.	.	.	.	.	.	.	.	.	.	.	.	.	.	.	100	.	.	.	.	100	.	.	100
S201-contigs.fna	7	.	.	.	.	.	.	.	.	.	100	.	.	100	.	.	.	.	.	100	100	.	.	.	.	.	.	.	.	.	100	.	.	.	.	.	.	.	.	.	.	.	.	.	.	100	.	.	.
S203-contigs.fna	5	.	.	.	.	.	.	.	.	.	.	.	.	100	.	.	.	.	100	.	.	100	.	.	.	.	.	.	.	.	99.62	.	.	.	.	.	.	.	.	.	.	.	.	.	.	.	.	.	100
S204-contigs.fna	2	.	.	.	.	.	.	.	.	.	.	.	.	100.00;99.23	.	.	.	.	.	.	100	.	.	.	.	.	.	.	.	.	.	.	.	.	.	.	.	.	.	.	.	.	.	.	.	.	.	.	.
S205-contigs.fna	9	.	.	.	.	.	.	.	.	.	97.37	.	.	100	.	.	.	.	.	93.56	100	.	.	.	.	99.6	.	.	.	.	.	.	.	.	100	100	.	.	.	.	.	.	100	.	.	.	.	.	.
S206-contigs.fna	7	.	.	.	.	.	.	.	.	.	100.00;100.00	.	.	.	.	.	.	.	.	.	.	.	.	.	.	.	.	.	100	.	.	.	.	.	100	88.69	.	.	.	.	.	.	.	.	.	100	.	.	.
S208-contigs.fna	8	.	.	.	.	100	.	.	.	.	.	.	.	100.00;100.00	.	.	.	.	100	.	.	100	100	.	.	.	.	.	.	.	.	.	.	100	.	.	.	.	.	.	.	.	.	.	.	100	.	.	90.37
S210-contigs.fna	7	.	.	99.24;98.47	.	.	.	.	.	.	.	99.03	.	100	.	.	.	.	.	.	.	.	.	.	.	.	.	.	.	.	.	.	.	.	.	.	.	.	.	.	100	.	.	.	.	100	.	.	100
S211-contigs.fna	7	.	.	.	.	.	.	.	.	.	97.37;100.00	.	.	.	.	.	.	.	.	100	100	.	.	.	.	.	.	.	.	.	100	.	.	.	.	.	.	.	.	.	.	.	.	100	.	100	.	.	.
S212-contigs.fna	11	.	.	99.24;98.47	.	.	.	100	.	.	100	.	.	100	.	.	.	.	100	.	.	100	.	.	.	.	.	.	.	.	.	.	.	.	100	100	.	.	.	.	.	.	.	.	.	100	.	.	.
S47-contigs.fna	2	.	.	.	.	.	.	.	.	.	.	.	.	100.00;100.00	.	.	.	.	.	.	.	.	.	.	.	.	.	99.62	.	.	.	.	.	.	.	.	.	.	.	.	.	.	.	.	.	.	.	.	.
S49-contigs.fna	8	.	.	.	.	.	.	.	.	99.29	97.37	.	.	100.00;100.00	.	.	.	.	.	.	.	.	.	.	.	.	.	.	.	.	.	.	.	.	100	100	.	.	.	.	.	.	.	.	.	100	.	.	.
S51-contigs.fna	7	.	.	.	.	.	.	.	.	.	100	.	.	.	.	.	.	.	.	.	.	.	.	.	.	.	.	.	100	.	.	.	.	.	100	100	.	.	.	.	.	.	.	.	.	100	.	.	.
S52-contigs.fna	2	.	.	100	.	.	.	.	.	.	.	.	.	.	.	.	.	.	.	.	100	.	.	.	.	.	.	.	.	.	.	.	.	.	.	.	.	.	.	.	.	.	.	.	.	.	.	.	.
S56-contigs.fna	7	.	.	.	.	.	.	.	.	.	.	.	.	.	.	.	.	.	.	100	100	.	.	.	100	.	.	.	.	.	100	.	.	.	.	.	100	.	.	.	100	.	.	.	.	100	.	.	.
S57-contigs.fna	6	.	.	.	.	.	.	.	.	99.29	.	.	.	96.92	.	.	.	.	99.74	.	.	100	.	.	.	.	.	.	.	.	.	.	.	.	.	.	.	.	.	.	.	.	.	.	.	.	.	.	100
S61-contigs.fna	6	.	.	.	.	.	.	.	.	.	.	.	.	.	.	.	.	.	100	.	.	100	.	.	.	.	.	.	.	.	.	.	.	.	100	100	.	.	.	.	.	.	.	.	.	.	.	.	100
S67-contigs.fna	5	.	.	.	.	.	.	.	.	99.29;99.29	.	.	.	100.00;100.00	.	.	.	.	.	.	.	.	.	.	.	.	.	.	.	.	.	.	.	.	100	100	.	.	.	.	.	.	.	.	.	.	.	.	.
S70-contigs.fna	3	.	.	.	.	.	.	.	.	.	.	.	.	.	.	.	.	.	.	.	.	.	.	.	.	.	.	.	.	.	.	.	.	.	100	100	.	.	.	.	.	.	.	.	.	.	.	.	.
S72-contigs.fna	10	100	.	98.47	.	.	.	.	.	.	96.49	.	.	100	.	.	.	.	100	.	.	100	.	.	.	.	.	.	100	.	.	.	.	.	.	.	100	.	.	.	.	.	100	.	.	100	.	.	.
S73-contigs.fna	8	.	.	100	.	.	.	100	.	.	.	.	.	.	.	.	.	.	.	100	100	.	.	.	.	.	.	.	91.15	.	100	.	.	.	.	.	.	.	.	.	.	.	.	.	.	100	.	.	.
S75-contigs.fna	5	.	.	.	.	.	.	.	.	.	.	.	.	.	.	.	.	.	.	.	100	.	.	.	.	99.6	.	.	.	.	.	.	.	.	100	100	.	.	.	.	.	.	.	.	.	.	.	.	.
S77-contigs.fna	5	.	.	.	.	.	.	.	.	.	99.12;100.00;95.61	.	.	.	.	.	.	.	.	100	100	.	.	.	.	100	.	.	.	.	.	.	.	.	.	.	100	.	.	.	.	.	.	.	.	.	.	.	.
S78-contigs.fna	9	100	.	98.47	.	.	.	.	.	.	98.25;96.49	.	.	.	.	.	.	.	100	.	.	100	.	.	.	.	.	.	100	.	.	.	.	.	.	.	100	.	.	.	.	.	100	.	.	100	.	.	.
S79-contigs.fna	6	.	.	.	.	.	.	.	.	.	.	.	.	.	.	.	.	.	100	.	.	100	.	.	.	.	.	.	.	.	.	.	.	.	100	100	.	.	.	.	.	.	.	.	.	.	.	.	100
S82-contigs.fna	6	.	.	.	.	.	.	.	.	.	.	.	.	100.00;100.00	.	.	.	.	.	.	100	.	.	.	.	.	.	.	100	.	.	.	.	.	100	100	.	.	.	.	.	.	.	.	.	.	.	.	.
S87-contigs.fna	6	.	.	100	.	.	.	.	.	.	.	.	.	100.00;100.00	.	.	.	.	100	.	.	100	.	.	100	.	.	.	.	.	.	.	.	.	.	.	.	.	.	.	.	.	.	.	.	.	.	.	.
S88-contigs.fna	6	.	.	100	.	.	.	.	.	.	.	.	.	100	.	.	.	.	100	.	.	100	.	.	100	.	.	.	.	.	.	.	.	.	.	.	.	.	.	.	.	.	.	.	.	.	.	.	.
S89-contigs.fna	6	.	.	.	.	.	.	.	.	.	.	.	.	.	100	.	.	.	.	.	100	.	.	.	.	.	.	.	100	.	.	.	.	.	100	100	.	.	.	.	.	.	.	.	.	.	.	.	.
S91-contigs.fna	9	.	.	100	.	.	.	.	.	.	100	.	.	100	.	.	.	.	.	.	.	.	.	.	.	.	.	.	100	.	.	.	.	.	100	100	.	.	.	.	.	98.52	.	.	.	100	.	.	.
S95-contigs.fna	6	.	.	.	.	.	.	.	.	.	.	.	.	.	100	.	.	.	.	.	100	.	.	.	.	.	.	.	100	.	.	.	.	.	100	100	.	.	.	.	.	.	.	.	.	.	.	.	.
S98-contigs.fna	6	.	.	100	.	.	.	.	.	.	.	.	.	100	.	.	.	.	100	.	.	100	.	.	100	.	.	.	.	.	.	.	.	.	.	.	.	.	.	.	.	.	.	.	.	.	.	.	.
S99-contigs.fna	6	.	.	100	.	.	.	100	.	.	.	.	.	.	.	.	.	.	100	.	.	100	.	.	.	.	.	.	100	.	.	.	.	.	.	.	.	.	.	.	.	.	.	.	.	100	.	.	.
SAX11-contigs.fna	5	.	.	.	.	.	.	.	.	.	.	.	.	.	.	.	.	95.62	.	93.56	100	.	.	.	.	99.6	.	.	.	.	.	.	.	.	.	.	.	.	.	.	.	.	.	.	.	.	.	100	.
SAX15-contigs.fna	7	.	.	.	.	100	.	.	.	.	.	.	.	100	.	.	.	.	100	.	.	100	.	.	.	.	.	.	.	.	.	.	.	.	.	.	100	.	.	.	.	.	.	.	.	100	.	.	90.37
SAX16-contigs.fna	3	.	.	.	.	.	.	.	.	.	.	.	.	97.69;98.46	.	.	.	.	.	.	100	.	.	.	.	99.6	.	.	.	.	.	.	.	.	.	.	.	.	.	.	.	.	.	.	.	.	.	.	.
SAX2-contigs.fna	7	.	.	.	.	.	.	.	.	.	.	.	.	100	.	.	.	.	.	.	100	.	.	.	.	99.6	.	.	.	.	.	.	.	.	100	100	.	.	.	.	.	.	93.97	.	.	.	.	.	.
SAX21-contigs.fna	3	.	.	.	.	.	.	.	.	.	.	.	.	100.00;90.77	.	.	.	.	.	.	.	.	.	.	.	99.6	.	.	.	.	.	.	.	.	.	.	.	.	.	.	.	.	.	100	.	.	.	.	.
SAX22-contigs.fna	5	.	.	.	.	.	.	.	.	.	.	.	.	100	.	.	.	.	.	.	100	100	.	.	.	99.6	.	.	.	.	.	.	.	.	.	.	.	.	.	.	.	.	.	.	.	100	.	.	.
SAX32-contigs.fna	5	.	.	.	.	.	.	.	.	.	.	99.03	.	100.00;90.77	.	.	.	.	.	100	100	.	.	.	.	.	.	.	.	.	.	.	.	.	.	.	100	.	.	.	.	.	.	.	.	.	.	.	.
SAX35-contigs.fna	2	.	.	.	.	.	.	.	.	.	100	.	.	.	.	.	.	.	.	.	.	.	.	.	.	.	.	.	.	.	.	.	.	.	.	.	.	.	.	.	.	.	.	.	.	.	.	.	.
SAX4-contigs.fna	9	.	.	.	.	.	.	.	.	.	.	.	100	98.46;100.00	.	.	.	.	.	.	100	.	.	.	.	99.6	.	.	100	.	.	.	.	.	100	100	.	.	.	.	100	.	.	.	.	.	.	.	.
SAX40-contigs.fna	3	.	.	.	.	.	.	.	.	.	.	.	.	.	.	.	.	.	.	.	.	.	.	.	.	.	.	.	.	.	.	.	.	.	.	.	.	.	.	.	84.24	.	.	.	.	.	100	.	.
SAX6-contigs.fna	4	.	.	.	.	.	.	.	.	.	100.00;100.00	.	.	.	.	.	.	.	100	.	.	.	.	.	.	.	.	.	.	.	.	100	100	.	.	.	.	.	.	.	.	.	.	.	.	.	.	.	.
SC1-contigs.fna	2	.	.	.	.	.	.	.	.	.	.	.	.	.	.	.	.	.	.	.	100	.	.	.	.	.	.	.	.	.	.	.	.	.	.	.	.	.	.	.	.	.	.	.	.	.	.	.	.
SC10-contigs.fna	4	.	.	100.00;98.47	.	.	.	.	.	.	.	.	.	100	.	.	.	.	.	.	100	.	.	.	.	99.6	.	.	.	.	.	.	.	.	.	.	.	.	.	.	.	.	.	.	.	.	.	.	.
SC3-contigs.fna	5	.	.	100	.	.	.	.	.	.	.	.	.	100	.	.	.	.	.	.	100	.	.	.	.	99.6	.	.	.	.	.	.	.	.	.	.	.	.	.	.	.	.	.	.	.	.	.	.	.
SC4-contigs.fna	7	.	.	100	.	.	.	.	.	.	98.25	.	.	100	.	.	.	.	.	98.97	100	.	.	.	.	99.6	.	.	.	.	.	.	.	.	.	.	.	.	.	.	.	.	.	.	.	100	.	.	.
SD1-contigs.fna	4	.	.	.	.	.	.	.	.	.	.	.	.	100	100	.	.	.	.	.	.	.	.	.	.	.	.	.	.	.	.	.	.	.	.	.	.	.	.	.	.	.	.	.	.	100	.	.	.
SD10-contigs.fna	4	.	.	.	.	.	.	.	.	.	.	.	.	.	.	.	.	.	.	.	100	.	.	.	.	.	.	.	.	.	.	.	.	.	.	.	.	.	.	.	.	.	100	.	.	100	.	.	.
SD11-contigs.fna	6	100	.	.	.	.	.	92.21	.	.	100	.	.	.	.	.	.	.	.	98.97	100	.	.	.	.	99.8	.	.	.	.	.	.	.	.	.	.	.	.	.	.	.	.	.	.	.	.	.	.	.
SD12-contigs.fna	8	.	.	.	.	.	.	.	.	.	.	.	100	90.77	.	.	.	.	.	.	100	.	.	.	.	.	.	.	100	.	100	.	.	.	.	.	.	.	.	.	.	.	.	.	.	100	.	.	90.37
SD15-contigs.fna	2	.	.	.	.	.	.	.	.	.	.	.	.	.	.	.	.	.	.	.	.	.	.	.	.	.	.	.	.	.	.	.	.	.	.	.	.	.	.	.	.	.	.	.	.	100	.	.	.
SD16-contigs.fna	5	.	.	.	.	.	.	.	.	.	100	.	.	100	.	.	.	.	.	.	.	.	.	.	.	.	.	.	.	.	100	.	.	.	.	.	.	.	.	.	.	.	.	.	.	.	.	.	100
SD2-contigs.fna	6	.	.	.	.	.	.	.	.	.	.	.	.	90.77	.	.	.	.	.	.	100	.	.	.	.	99.6	.	99.62	.	.	.	.	.	.	.	.	100	.	.	.	.	.	.	.	.	100	.	.	.
SD21-contigs.fna	9	.	.	100	.	.	.	.	.	99.29;99.29	96.49	.	100	100.00;100.00	.	.	.	.	.	.	100	.	.	.	.	.	.	.	100	.	.	.	.	.	.	.	.	.	.	.	.	.	.	.	.	100	.	.	90.37
SD23-contigs.fna	7	.	.	.	.	.	.	.	.	99.29	.	.	.	96.92	.	.	.	.	.	100	100	.	.	.	.	.	.	.	.	.	100	.	.	.	.	.	.	.	.	.	.	.	.	.	.	.	.	.	100
SD26-contigs.fna	2	.	.	.	.	.	.	.	.	.	.	.	.	100	.	.	.	.	.	.	.	.	.	.	.	.	.	.	.	.	.	.	.	.	.	.	.	.	.	.	.	.	.	.	.	.	.	.	100
SD28-contigs.fna	8	.	.	96.18	.	.	.	.	.	100	.	.	100	98.46	.	.	.	.	.	.	.	.	.	.	.	.	.	.	.	.	100	.	.	.	.	.	.	.	.	.	.	.	100	100	.	100	.	.	.
SD30-contigs.fna	5	.	.	.	.	.	.	.	.	.	.	.	.	.	.	.	.	.	.	93.56	100	.	.	.	.	99.6	.	.	100	.	.	.	.	.	.	.	.	.	.	.	.	.	.	.	.	.	.	.	.
SD35-contigs.fna	4	.	.	.	.	.	.	.	.	.	.	.	.	.	.	.	.	.	.	93.56	100	.	.	.	.	99.6	.	.	100	.	.	.	.	.	.	.	.	.	.	.	.	.	.	.	.	.	.	.	.
SD36-contigs.fna	4	.	.	.	.	.	.	.	.	.	.	.	.	.	.	.	.	.	.	93.56	100	.	.	.	.	99.6	.	.	100	.	.	.	.	.	.	.	.	.	.	.	.	.	.	.	.	.	.	.	.
SD37-contigs.fna	7	.	.	.	.	.	.	.	.	.	.	.	.	100	.	.	.	.	.	93.56	100	.	.	.	.	99.6	.	.	.	.	.	.	.	.	.	.	.	.	.	.	100	.	100	.	.	100	.	.	.
SD38-contigs.fna	4	.	.	.	.	.	.	.	.	.	.	.	.	.	.	.	.	.	.	93.56	100	.	.	.	.	99.6	.	.	100	.	.	.	.	.	.	.	.	.	.	.	.	.	.	.	.	.	.	.	.
SD40-contigs.fna	6	.	.	.	.	.	.	.	.	.	.	.	.	100.00;84.62	.	.	.	.	100	.	.	.	.	.	.	.	.	.	.	.	.	100	100	.	.	.	.	.	.	.	.	.	.	100	.	100	.	.	.
SD5-contigs.fna	8	.	.	100	.	.	.	.	.	.	92.11	.	.	100.00;98.46	100	.	.	.	100	.	.	100	.	.	.	.	.	.	.	.	.	.	.	.	.	.	.	.	.	.	.	.	.	.	.	100	.	.	.
SD58-contigs.fna	3	.	.	.	.	.	.	.	.	.	.	.	.	98.46	.	.	.	.	.	.	.	.	.	.	.	.	.	.	.	.	.	.	.	.	.	.	.	.	.	.	.	.	.	.	.	100	.	.	.
SD7-contigs.fna	8	.	.	98.47	.	.	.	.	.	.	.	.	.	98.46;97.69	.	.	.	.	.	.	100	.	.	.	.	99.6	.	.	.	.	.	.	.	.	100	100	.	.	.	.	100	.	.	.	.	.	.	.	.
SH22-contigs.fna	2	.	.	100.00;99.24	.	.	.	.	.	.	.	.	.	84.62	.	.	.	.	.	.	.	.	.	.	.	.	.	.	.	.	.	.	.	.	.	.	.	.	.	.	.	.	.	.	.	.	.	.	.
SH30-contigs.fna	3	.	.	.	.	.	.	.	.	.	.	.	.	.	.	.	.	.	.	93.56	100	.	.	.	.	99.6	.	.	.	.	.	.	.	.	.	.	.	.	.	.	.	.	.	.	.	.	.	.	.
SH36-contigs.fna	5	.	.	.	.	.	.	.	.	.	.	.	.	100	.	.	.	.	.	93.56	100	.	.	.	.	99.6	.	.	.	.	.	.	.	.	.	.	100	.	.	.	.	.	.	.	.	.	.	.	.
SH40-contigs.fna	8	.	.	100	.	.	.	.	.	.	.	.	.	100	.	.	.	.	.	.	100	.	.	.	100	99.6	.	.	.	.	99.62	.	.	.	.	.	.	.	.	.	.	.	.	.	.	100	.	.	90.37
SH41-contigs.fna	1	.	.	.	.	.	.	.	.	.	.	.	.	.	.	.	.	.	.	.	.	.	.	.	100	.	.	.	.	.	.	.	.	.	.	.	.	.	.	.	.	.	.	.	.	.	.	.	.
SH43-contigs.fna	5	.	.	.	.	.	.	.	.	.	.	.	.	100	.	.	.	.	.	93.56	100	.	.	.	.	99.6	.	.	.	.	.	.	.	.	.	.	100	.	.	.	.	.	.	.	.	.	.	.	.
SH44-contigs.fna	7	.	.	100	.	.	.	.	.	.	.	.	.	100	.	.	.	.	.	.	100	.	.	.	.	99.6	.	.	.	.	99.62	.	.	.	.	.	.	.	.	.	.	.	.	.	.	100	.	.	90.37
SH46-contigs.fna	4	.	.	.	.	.	.	.	.	.	100.00;100.00	.	.	.	.	.	.	.	.	.	.	.	.	.	.	.	.	.	.	.	.	.	.	.	.	.	100	.	.	.	100	.	.	.	.	.	.	.	.
SH47-contigs.fna	2	.	.	.	.	.	.	.	.	.	.	.	.	.	.	.	.	.	.	.	.	.	.	.	.	.	.	.	.	.	.	.	.	.	.	.	100	.	.	.	.	.	.	.	.	.	.	.	.
SH48-contigs.fna	4	.	.	.	.	.	.	.	.	.	.	.	.	90.77;100.00;100.00	.	.	.	.	.	.	.	100	.	.	.	.	.	99.62	.	.	.	.	.	.	.	.	.	.	.	.	.	.	.	.	.	.	.	.	.
SH50-contigs.fna	4	.	.	.	.	.	.	.	.	.	100.00;100.00	.	.	.	.	.	.	.	.	.	.	.	.	.	.	.	.	.	.	.	.	.	.	.	.	.	100	.	.	.	100	.	.	.	.	.	.	.	.
SH51-contigs.fna	4	.	.	.	.	.	.	.	.	.	.	.	.	100	.	.	.	.	.	.	100	.	.	.	.	99.6	.	.	.	.	.	.	.	.	.	.	100	.	.	.	.	.	.	.	.	.	.	.	.
SH52-contigs.fna	8	.	.	.	.	.	.	.	.	.	.	.	.	.	.	.	.	.	.	.	.	.	.	.	100	.	.	.	.	.	.	.	.	.	100	100	100	.	.	.	100	.	.	100	.	100	.	.	.
SH53-contigs.fna	2	.	.	.	.	.	.	.	.	.	.	.	.	.	.	.	.	.	.	.	.	.	.	.	.	.	.	.	.	.	.	.	.	.	.	.	100	.	.	.	.	.	.	.	.	.	.	.	.
SH55-contigs.fna	2	.	.	.	.	.	.	.	.	.	.	.	.	.	.	.	.	.	.	.	.	.	.	.	.	.	.	.	.	.	.	.	.	.	.	.	100	.	.	.	.	.	.	.	.	.	.	.	.
SH56-contigs.fna	8	.	.	.	.	.	.	.	.	.	.	.	.	.	.	.	.	.	.	.	.	.	.	.	100	.	.	.	.	.	.	.	.	.	100	100	100	.	.	.	100	.	.	100	.	100	.	.	.
SH57-contigs.fna	6	.	.	.	.	.	.	.	.	.	.	.	.	.	.	.	.	.	.	.	.	.	.	.	.	.	.	.	.	.	.	.	.	.	100	100	100	.	.	.	100	.	.	.	.	.	.	.	.
SH59-contigs.fna	2	.	.	.	.	.	.	.	.	.	.	.	.	.	.	.	.	.	.	.	.	.	.	.	.	.	.	.	.	.	.	.	.	.	.	.	100	.	.	.	.	.	.	.	.	.	.	.	.
SH60-contigs.fna	5	.	.	.	.	.	.	.	.	.	.	.	100	90.77;100.00	.	.	.	.	.	.	.	100	.	.	.	.	.	99.62	.	.	.	.	.	.	.	.	.	.	.	.	.	.	.	.	.	.	.	.	.
SH63-contigs.fna	8	.	.	.	.	.	.	.	.	.	.	.	100	98.46	.	.	.	.	.	.	100	.	.	.	100	99.6	.	.	.	.	.	.	.	.	.	.	.	.	.	.	98.64	.	.	100	.	100	.	.	.
SH68-contigs.fna	6	95.71	.	100	.	.	.	.	.	.	.	.	.	.	.	.	.	.	.	100	100	.	.	.	.	99.6	.	.	.	.	.	.	.	.	.	.	.	.	.	.	.	.	.	.	.	.	.	.	.
SH7-contigs.fna	3	.	.	.	.	.	.	.	.	.	.	.	.	.	.	.	.	.	.	93.56	100	.	.	.	.	99.6	.	.	.	.	.	.	.	.	.	.	.	.	.	.	.	.	.	.	.	.	.	.	.
SH71-contigs.fna	3	.	.	.	.	.	.	.	.	.	.	.	.	98.46	.	.	.	.	.	.	.	100	.	.	.	.	.	.	.	.	.	.	.	.	.	.	.	.	.	.	.	.	.	.	.	100	.	.	.
SH77-contigs.fna	6	100	.	100	.	.	.	.	.	.	.	.	.	.	.	.	.	.	.	100	100	.	.	.	.	99.6	.	.	.	.	.	.	.	.	.	.	.	.	.	.	.	.	.	.	.	.	.	.	.
SH79-contigs.fna	6	100	.	100	.	.	.	.	.	.	.	.	.	.	.	.	.	.	.	100	100	.	.	.	.	99.6	.	.	.	.	.	.	.	.	.	.	.	.	.	.	.	.	.	.	.	.	.	.	.
SH90-contigs.fna	3	.	.	.	.	.	.	.	.	.	.	.	.	100	.	.	.	.	.	.	100	.	.	.	.	99.6	.	.	.	.	.	.	.	.	.	.	.	.	.	.	.	.	.	.	.	.	.	.	.
SHB15-contigs.fna	9	.	.	.	.	.	.	.	.	.	.	.	100	.	.	.	.	.	100	.	.	100	.	.	100	.	.	.	100	.	.	.	.	.	100	100	.	.	.	.	.	.	.	.	.	100	.	.	.
SHB6-contigs.fna	5	.	.	.	.	.	.	.	.	.	.	.	.	.	.	.	.	.	100	.	.	100	.	.	.	.	.	.	.	.	.	.	.	.	.	.	.	.	.	.	.	.	95.73	100	.	100	.	.	.
SX52-contigs.fna	5	.	.	98.85	.	.	.	.	.	.	.	.	.	.	.	.	.	.	.	.	100	.	.	.	.	99.6	.	.	.	.	.	.	.	.	.	.	.	.	.	.	.	.	.	.	.	100	.	.	90.37
SX54-contigs.fna	7	.	.	100	.	.	.	.	.	.	.	.	.	100.00;100.00	.	100	.	.	.	98.97	100	.	.	.	.	99.6	.	.	.	.	.	.	.	.	.	.	100	.	.	.	.	.	.	.	.	.	.	.	.
TJ-contigs.fna	5	.	.	.	.	.	.	.	.	.	100	.	.	92.31	.	.	.	.	.	.	.	100	.	.	.	.	.	.	.	.	.	.	.	.	.	.	100	.	.	.	.	.	.	.	.	100	.	.	.
TJ1-contigs.fna	5	.	.	.	.	.	.	.	.	.	99.12;98.25	.	.	.	.	.	.	.	.	.	.	.	.	.	.	99.6	.	.	.	.	.	.	.	.	.	.	100	.	.	.	.	.	.	100	.	100	.	.	.
TJ10-contigs.fna	5	.	.	.	.	.	.	.	.	.	98.25;99.12	.	.	.	.	.	.	.	.	.	.	.	.	.	.	99.6	.	.	.	.	.	.	.	.	.	.	100	.	.	.	.	.	.	100	.	100	.	.	.
TJ12-contigs.fna	5	.	.	.	.	.	.	.	.	.	99.12;98.25	.	.	.	.	.	.	.	.	.	.	.	.	.	.	99.6	.	.	.	.	.	.	.	.	.	.	100	.	.	.	.	.	.	100	.	100	.	.	.
TJ15-contigs.fna	5	.	.	.	.	.	.	.	.	.	99.12;98.25	.	.	.	.	.	.	.	.	.	.	.	.	.	.	99.6	.	.	.	.	.	.	.	.	.	.	100	.	.	.	.	.	.	100	.	100	.	.	.
TJ17-contigs.fna	5	.	.	.	.	.	.	.	.	.	99.12;98.25	.	.	.	.	.	.	.	.	.	.	.	.	.	.	99.6	.	.	.	.	.	.	.	.	.	.	100	.	.	.	.	.	.	100	.	100	.	.	.
TJ3-contigs.fna	5	.	.	.	.	.	.	.	.	.	98.25;99.12	.	.	.	.	.	.	.	.	.	.	.	.	.	.	99.6	.	.	.	.	.	.	.	.	.	.	100	.	.	.	.	.	.	100	.	100	.	.	.
TJ5-contigs.fna	5	.	.	.	.	.	.	.	.	.	99.12;98.25	.	.	.	.	.	.	.	.	.	.	.	.	.	.	99.6	.	.	.	.	.	.	.	.	.	.	100	.	.	.	.	.	.	100	.	100	.	.	.
TJ50-contigs.fna	2	.	.	.	.	.	.	.	.	.	.	.	.	.	.	.	.	.	.	.	100	.	.	.	.	99.6	.	.	.	.	.	.	.	.	.	.	.	.	.	.	.	.	.	.	.	.	.	.	.
TJ8-contigs.fna	6	.	.	.	.	.	.	.	.	.	99.12;98.25	.	.	.	.	.	.	.	.	.	.	.	.	.	.	99.6	.	.	.	.	.	.	.	.	.	.	100	.	.	.	.	.	.	100	.	100	.	.	.
XD1-contigs.fna	8	.	.	.	.	.	.	.	.	.	99.12	.	.	100	.	.	.	.	.	100	100	.	.	.	.	100	.	.	.	.	.	.	.	.	100	100	.	.	.	.	.	.	.	.	.	.	.	.	.
XD100.fna	8	.	.	.	.	.	.	.	.	99.29	.	99.03	100	100.00;96.92;92.31;90.77	.	.	.	.	.	.	.	.	.	.	.	.	.	.	100	.	.	.	.	.	.	.	.	.	.	.	.	.	.	100	.	100	.	.	.
XD101-contigs.fna	9	.	.	100	.	.	.	98.7	.	.	96.49	97.58	.	.	.	.	.	.	.	.	100	.	.	.	.	.	.	.	100	.	.	.	.	.	100	100	.	.	.	.	.	.	.	.	.	.	.	.	.
XD11.fna	12	.	.	100	.	.	.	.	.	.	.	99.03	100	92.31;100.00	.	.	.	.	.	100	.	100	.	.	.	99.6	.	.	100	.	.	.	.	.	100	100	.	.	.	.	.	.	.	.	.	.	.	.	.
XD115.fna	13	.	.	99.62	.	.	.	100	.	.	100	99.03	100	100.00;96.15;94.62;92.31;100.00	.	.	.	.	100	.	.	100	.	.	.	.	.	.	100	.	.	.	.	.	.	.	.	.	.	.	.	.	.	.	.	100.00;100.00	.	.	90.37
XD116-contigs.fna	1	.	.	.	.	.	.	.	.	.	.	.	.	.	.	.	.	.	.	.	.	.	.	.	.	.	.	.	.	.	.	.	.	.	.	.	.	.	.	.	.	.	.	.	.	.	.	.	.
XD12.fna	13	.	.	100	.	.	.	100	.	.	.	99.03	.	98.46;100.00;100.00;92.31;100.00	.	.	.	.	.	.	.	.	.	.	.	.	.	.	100	.	.	.	.	.	100	100	100	.	.	.	.	.	.	.	.	100	.	.	90.37
XD171-contigs.fna	3	.	.	.	.	.	.	.	.	.	.	.	.	.	.	.	.	.	.	.	.	.	.	.	.	99.6	.	.	.	.	.	.	.	.	.	.	.	.	.	.	.	.	.	100	.	100	.	.	.
XD2-contigs.fna	7	.	.	.	.	.	.	.	.	.	.	.	.	.	.	.	.	.	.	93.56	100	.	.	.	.	99.6	.	.	.	.	.	.	.	.	100	100	.	.	.	.	.	.	.	.	.	.	.	.	.
XD20.fna	13	.	.	100	.	.	.	100	.	.	.	99.03	.	98.46;100.00;100.00;92.31	.	.	.	.	.	.	.	.	.	.	.	.	.	.	100	.	.	.	.	.	100	100	100	.	.	.	.	.	.	.	.	100	.	.	90.37
XD23-contigs.fna	7	.	.	.	.	.	.	100	.	99.29	.	.	.	98.46;100.00	100	.	.	.	100	.	.	100	.	.	.	.	.	.	100	.	.	.	.	.	.	.	.	.	.	.	.	.	.	.	.	.	.	.	.
XD24.fna	14	.	.	100	.	.	.	100	.	.	.	99.03	100	98.46;100.00;100.00;92.31	.	.	.	.	.	.	.	.	.	.	.	.	.	.	100	.	.	.	.	.	100	100	100	.	.	.	.	.	.	.	.	100	.	.	90.37
XD25-contigs.fna	3	.	.	.	.	.	.	.	.	.	.	.	.	.	.	.	.	.	.	100	100	.	.	.	.	.	.	.	.	.	100	.	.	.	.	.	.	.	.	.	.	.	.	.	.	.	.	.	.
XD26-contigs.fna	3	.	.	.	.	.	.	.	.	.	.	.	.	.	.	.	.	.	.	100	100	.	.	.	.	.	.	.	.	.	100	.	.	.	.	.	.	.	.	.	.	.	.	.	.	.	.	.	.
XD3-contigs.fna	5	.	.	.	.	.	.	.	.	.	.	.	.	98.46	.	.	.	.	.	.	.	.	100	.	.	.	.	.	100	.	.	.	.	.	.	.	.	.	.	.	.	.	.	100	.	100	.	.	.
XD33.fna	13	.	.	88.55	.	.	.	100	.	.	.	.	100	92.31;100.00;100.00	.	.	.	.	.	100	.	100	.	.	.	99.6	.	.	100	.	.	.	.	.	100	100	.	.	.	.	.	.	.	.	.	.	.	.	.
XD34-contigs.fna	4	.	.	.	.	.	.	100	.	.	.	.	.	.	.	.	.	.	.	.	100	.	.	.	.	99.6	.	.	100	.	.	.	.	.	.	.	.	.	.	.	.	.	.	.	.	.	.	.	.
XD35.fna	11	.	.	.	.	.	.	.	.	.	.	.	100	100	.	.	.	.	.	100	.	100	.	.	.	99.6	.	.	98.85	.	.	.	.	.	100	100	.	.	.	.	.	.	.	.	.	.	.	.	.
XD36.fna	11	.	.	92.75	.	.	.	.	.	.	.	99.03	100	92.31;100.00	.	.	.	.	.	100	.	100	.	.	.	99.6	.	.	100	.	.	.	.	.	100	100	.	.	.	.	.	.	.	.	.	.	.	.	.
XD37-contigs.fna	8	100	.	.	.	.	.	100	.	.	.	.	.	.	.	.	.	.	.	.	.	.	100	.	.	.	.	.	100	.	.	.	.	.	100	100	.	.	.	.	.	.	.	.	.	100	.	.	.
XD38-contigs.fna	7	.	.	100	.	.	.	100	.	.	.	.	.	100	.	.	.	.	100	.	.	100	.	.	.	.	.	.	100	.	.	.	.	.	.	.	.	.	.	.	.	.	.	.	.	.	.	.	.
XD39-contigs.fna	4	.	.	.	.	.	.	100	.	.	.	.	.	.	.	.	.	.	.	.	100	.	.	.	.	99.6	.	.	100	.	.	.	.	.	.	.	.	.	.	.	.	.	.	.	.	.	.	.	.
XD40-contigs.fna	4	.	.	.	.	.	.	100	.	.	.	.	.	.	.	.	.	.	.	.	100	.	.	.	.	99.6	.	.	100	.	.	.	.	.	.	.	.	.	.	.	.	.	.	.	.	.	.	.	.
XD86-contigs.fna	6	.	.	100	.	.	.	.	.	.	.	.	.	100	.	.	.	.	100	.	.	100	.	.	100	.	.	.	.	.	.	.	.	.	.	.	.	.	.	.	.	.	.	.	.	.	.	.	.
XD97.fna	8	.	.	100	.	.	.	100	.	.	.	99.03	100	92.31;100.00;100.00	.	.	.	.	.	.	100	.	.	.	.	99.6	.	.	100	.	.	.	.	.	.	.	.	.	.	.	.	.	.	.	.	.	.	.	.
XJ12-contigs.fna	6	.	.	.	.	.	.	.	.	.	.	.	.	.	100	.	.	.	.	.	100	.	.	.	.	99.6	.	.	.	.	.	.	.	.	.	.	100	.	.	.	.	.	.	.	.	100	.	.	.
XJ13-contigs.fna	6	.	.	.	.	.	.	.	.	.	.	.	.	.	100	.	.	.	.	.	100	.	.	.	.	99.6	.	.	.	.	.	.	.	.	.	.	100	.	.	.	.	.	.	.	.	100	.	.	.
XJ15-contigs.fna	2	.	.	.	.	.	.	.	.	.	.	.	.	.	.	.	.	.	.	.	.	.	.	.	.	.	.	.	.	.	.	.	.	.	.	.	.	.	.	.	.	.	.	.	.	100	.	.	.
XJ17-contigs.fna	10	.	.	.	.	.	.	.	.	.	96.49;99.12	.	.	83.08	.	.	.	.	.	.	100	.	.	.	.	100	.	.	.	.	.	.	.	.	100	100	.	100	.	97.16	.	.	.	.	.	.	.	.	.
XJ26-contigs.fna	2	.	.	.	.	.	.	.	.	.	.	.	.	.	.	100	.	.	.	.	.	.	.	.	.	.	.	.	.	.	.	.	.	.	.	.	100	.	.	.	.	.	.	.	.	.	.	.	.
XJ32-contigs.fna	6	.	.	.	.	.	.	.	.	99.29	.	.	.	98.46;100.00	.	.	.	.	.	98.97	100	.	.	.	.	99.8	.	.	.	.	.	.	.	.	.	.	.	.	.	.	.	.	.	.	.	100	.	.	.
XJ33-contigs.fna	2	.	.	.	.	.	.	.	.	.	.	.	.	.	.	100	.	.	.	.	.	.	.	.	.	.	.	.	.	.	.	.	.	.	.	.	100	.	.	.	.	.	.	.	.	.	.	.	.
XJ35-contigs.fna	5	.	.	.	.	.	.	.	.	.	100	.	.	.	.	.	.	.	.	.	.	.	.	.	.	.	.	.	.	.	100	.	.	.	.	.	100	.	.	.	100	.	.	.	.	.	.	.	.
XJ36-contigs.fna	2	.	.	.	.	.	.	.	.	.	.	.	.	.	.	100	.	.	.	.	.	.	.	.	.	.	.	.	.	.	.	.	.	.	.	.	100	.	.	.	.	.	.	.	.	.	.	.	.
XJ39-contigs.fna	3	.	.	.	.	.	.	.	.	.	.	.	.	.	.	.	.	.	.	.	100	.	.	.	.	99.6	.	.	.	.	.	.	.	.	.	.	100	.	.	.	.	.	.	.	.	.	.	.	.
XJ4-contigs.fna	6	.	.	.	.	.	.	.	.	.	.	.	.	.	100	.	.	.	.	.	100	.	.	.	.	99.6	.	.	.	.	.	.	.	.	.	.	100	.	.	.	.	.	.	.	.	100	.	.	.
XJ40-contigs.fna	2	.	.	.	.	.	.	.	.	.	.	.	.	.	.	.	.	.	.	.	.	.	.	.	.	.	.	.	.	.	100	.	.	.	.	.	.	.	.	.	.	.	.	.	.	.	.	.	.
XJ48-contigs.fna	5	.	.	.	.	.	.	.	.	.	.	.	.	.	.	.	.	.	.	.	100	100	.	.	.	.	.	.	.	.	100	.	.	.	.	.	100	.	.	.	.	.	.	.	.	100	.	.	.
XJ49-contigs.fna	4	.	.	.	.	.	.	.	.	.	.	.	.	100	.	.	.	.	.	.	100	.	.	.	.	99.6	.	.	.	.	.	.	.	.	.	.	.	.	.	.	.	.	.	.	.	100	.	.	.
XJ5-contigs.fna	3	.	.	.	.	.	.	.	.	.	100	.	.	.	.	.	.	.	.	.	100	100	.	.	.	.	.	.	.	.	.	.	.	.	.	.	.	.	.	.	.	.	.	.	.	.	.	.	.
XJ50-contigs.fna	2	.	.	.	.	.	.	.	.	.	.	.	.	.	.	.	.	.	.	.	100	.	.	.	.	99.6	.	.	.	.	.	.	.	.	.	.	.	.	.	.	.	.	.	.	.	.	.	.	.
XJ9-contigs.fna	6	.	.	.	.	.	.	.	.	.	.	.	.	.	100	.	.	.	.	.	100	.	.	.	.	99.6	.	.	.	.	.	.	.	.	.	.	100	.	.	.	.	.	.	.	.	100	.	.	.
YN13-contigs.fna	2	.	.	.	.	.	.	.	.	.	.	.	.	100.00;84.62	.	.	.	.	.	.	.	.	.	.	.	.	.	.	.	.	.	.	.	.	.	.	.	.	.	.	.	.	.	.	.	100	.	.	.
YN17-contigs.fna	3	.	.	.	.	.	.	.	.	.	.	.	.	90.77	.	.	.	.	.	.	100	.	.	.	.	.	.	.	.	.	.	.	.	.	.	.	.	.	100	.	.	.	.	.	.	.	.	.	.
YN19-contigs.fna	3	.	.	.	.	.	.	.	.	.	.	.	.	90.77	.	.	.	.	.	.	100	.	.	.	.	.	.	.	.	.	.	.	.	.	.	.	.	.	100	.	.	.	.	.	.	.	.	.	.
YN20-contigs.fna	3	.	.	.	.	.	.	.	.	.	.	.	.	90.77	.	.	.	.	.	.	100	.	.	.	.	.	.	.	.	.	.	.	.	.	.	.	.	.	100	.	.	.	.	.	.	.	.	.	.
YN22-contigs.fna	3	.	.	.	.	.	.	.	.	.	.	.	.	90.77	.	.	.	.	.	.	100	.	.	.	.	.	.	.	.	.	.	.	.	.	.	.	.	.	100	.	.	.	.	.	.	.	.	.	.
YN33-contigs.fna	5	.	.	.	.	.	.	.	.	.	.	.	.	100	.	.	.	.	.	100	100	.	.	.	.	.	.	.	.	100	.	.	.	.	.	.	100	.	.	.	.	.	.	.	.	.	.	.	.
YN34-contigs.fna	8	.	.	100	.	.	.	.	.	.	100	.	.	.	.	.	.	.	.	100	100	.	.	.	.	.	.	.	.	.	100	.	.	.	.	.	.	.	.	.	.	.	.	100	.	100	.	.	.
YN39-contigs.fna	9	.	.	96.18	.	.	.	.	.	.	100	.	.	.	.	.	.	.	.	100	100	.	.	.	.	.	.	.	.	.	100	.	.	.	.	.	100	.	.	.	.	.	.	100	.	100	.	.	.
ZJ1-contigs.fna	5	.	.	.	.	.	.	.	.	.	.	.	.	100	.	.	.	.	.	.	.	.	.	.	.	.	.	.	100	.	.	.	.	.	.	.	.	.	.	.	.	.	100	.	.	100	.	.	.
ZJ20-contigs.fna	7	.	.	.	.	.	.	.	.	.	.	.	100	.	.	.	.	.	100	.	100	100	.	.	.	99.6	.	.	100	.	.	.	.	.	.	.	.	.	.	.	.	.	.	.	.	100	.	.	.
ZJ29-contigs.fna	5	.	.	.	.	.	.	.	.	.	.	.	.	.	.	.	.	.	.	.	100	100	.	.	100	99.6	.	.	100	.	.	.	.	.	.	.	.	.	.	.	.	.	.	.	.	.	.	.	.
[truncated: 5 more columns]
