# Supplementary material for: Antimicrobial resistance and population genomics of extensively drug resistant Escherichia coli in pig farms in mainland China: a national wide epidemiological and microbiological study
Source: Research Square preprint supplement (doi:10.21203/rs.3.rs-502741/v1), 2021-05-14
Supplement: Supplementary file 2 [file 483d07faaf8def281a15bf22.xlsx]

## Sheet: Sheet1
snp-dists 0.6.3	GCF_003290515	GCF_003290525	GCF_003290535	GCF_003290575	GCF_003290595	GCF_003290605	GCF_003290615	GCF_003290625	GCF_003290675	GCF_003290685	GCF_003290695	GCF_003290705	GCF_003290755	GCF_003290765	GCF_003290775	GCF_003290785	GCF_003290835	GCF_003290845	GCF_003290855	GCF_003290875	GCF_003290915	GCF_003290935	GCF_003290945	GCF_003290955	GCF_003290995	GCF_003291015	GCF_003291025	GCF_003291035	GCF_003291075	GCF_003291095	GCF_003291105	GCF_003291115	GCF_003291155	GCF_003291175	GCF_003291185	GCF_003291195	GCF_003291235	GCF_003291255	GCF_003291275	GCF_003291285	GCF_003291305	GCF_003291315	GCF_003291355	GCF_003291365	GCF_003291385	GCF_003291415	GCF_003291425	GCF_003291435	GCF_003291455
LN43	6091	6054	5774	6149	6059	6084	6098	6097	6080	6148	6072	6099	6104	6091	5904	6101	6126	6074	6098	6098	6137	6209	5396	6113	6141	6100	6171	6133	6104	6152	6116	6061	6097	6104	3390	6068	6154	6079	6124	6070	6169	6165	5971	6118	6069	6131	6127	6098	6091
AH11	3047	3082	7009	2313	3087	1792	3172	1630	3234	1687	3085	1653	2987	3111	3774	3191	3128	3151	3168	3168	3139	1620	5734	3102	3157	2982	2082	3127	3010	1698	3117	3124	3189	3095	6012	3012	2007	3164	3120	3093	3675	1622	1965	3128	3014	1657	3184	3043	3095
AH20	3047	3082	7009	2313	3087	1792	3172	1630	3234	1687	3085	1653	2987	3111	3774	3191	3128	3151	3168	3168	3139	1620	5734	3102	3157	2982	2082	3127	3010	1698	3117	3124	3189	3095	6012	3012	2007	3164	3120	3093	3675	1622	1965	3128	3014	1657	3184	3043	3095
AH22	3047	3082	7009	2313	3087	1792	3172	1630	3234	1687	3085	1653	2987	3111	3774	3191	3128	3151	3168	3168	3139	1620	5734	3102	3157	2982	2082	3127	3010	1698	3117	3124	3189	3095	6012	3012	2007	3164	3120	3093	3675	1622	1965	3128	3014	1657	3184	3043	3095
NMG25	3067	3164	6757	2340	3169	1911	3251	1807	3371	1758	3156	1881	3082	3178	3794	3210	3183	3140	3239	3239	3200	1789	5755	3143	3220	3011	2285	3188	3058	1778	3177	3162	3206	3161	5956	3067	2328	3185	3198	3124	3755	1871	7	3207	3020	1330	3242	3117	3175
SH46	1122	590	6871	2832	595	3023	1039	3060	1165	3041	785	2994	1169	252	1804	1737	1292	968	1027	1027	1297	3021	5641	1292	867	1714	2992	1291	1900	3020	1284	1358	1735	1333	5939	468	2935	1712	1284	1549	3321	3139	3177	227	1566	2984	1447	790	27
SH50	1122	590	6871	2832	595	3023	1039	3060	1165	3041	785	2994	1169	252	1804	1737	1292	968	1027	1027	1297	3021	5641	1292	867	1714	2992	1291	1900	3020	1284	1358	1735	1333	5939	468	2935	1712	1284	1549	3321	3139	3177	227	1566	2984	1447	790	27
HUN107	5580	5578	6815	5627	5583	5533	5597	5571	5633	5566	5596	5579	5602	5593	5053	5581	5579	5575	5597	5597	5599	5642	2718	5586	5648	5555	5649	5583	5555	5575	5569	5571	5579	5613	5165	5568	5651	5557	5603	5571	5660	5560	5638	5618	5578	5564	5574	5610	5604
S89	3068	3165	6758	2341	3170	1912	3252	1808	3372	1759	3157	1882	3083	3179	3795	3211	3184	3141	3240	3240	3201	1790	5756	3144	3221	3012	2286	3189	3059	1779	3178	3163	3207	3162	5957	3068	2329	3186	3199	3125	3756	1872	8	3208	3021	1331	3243	3118	3176
S95	3068	3165	6758	2341	3170	1912	3252	1808	3372	1759	3157	1882	3083	3179	3795	3211	3184	3141	3240	3240	3201	1790	5756	3144	3221	3012	2286	3189	3059	1779	3178	3163	3207	3162	5957	3068	2329	3186	3199	3125	3756	1872	8	3208	3021	1331	3243	3118	3176
SH22	1795	1807	6922	2937	1812	3116	1759	3175	1891	3154	1542	3100	1757	1759	2918	10	1689	1634	1745	1745	1699	3091	5662	1622	1572	1698	3142	1683	1837	3143	1678	1792	8	1799	5846	1853	3089	59	1673	1812	3409	3165	3205	1796	1978	3085	1739	1624	1730
HUN19	5820	5844	5971	5910	5849	5762	5817	5825	5838	5837	5821	5819	5846	5882	5667	5795	5849	5829	5813	5813	5872	5875	5248	5854	5863	5827	5895	5858	5831	5844	5851	5812	5791	5852	155	5857	5832	5773	5857	5799	5933	5792	5868	5913	5815	5781	5854	5850	5875
HUN27	2875	2955	6855	2067	2960	1562	3032	1584	3112	1452	2938	1397	2880	2989	3656	3041	3001	3002	3022	3022	3007	1470	5653	2938	3013	2868	1784	3003	2900	1452	2986	2976	3037	2947	5852	2851	1873	3013	2985	2926	3524	1597	1772	3008	2834	1445	3052	2890	2957
SAX16	928	349	6893	2828	354	3014	1305	3074	1373	3029	1051	3023	1225	580	1752	1827	1069	1217	1293	1293	1078	3051	5656	1282	1139	1754	2982	1064	1924	3008	1059	1091	1823	1050	5939	733	2948	1804	1342	1391	3291	3160	3168	557	1322	3008	1222	1080	512
CQ21	1311	749	6933	2946	754	3140	1211	3192	1303	3158	957	3107	1332	411	1867	1848	1454	1138	1199	1199	1457	3143	5760	1425	1033	1827	3107	1453	2035	3137	1451	1492	1844	1440	6010	628	3060	1825	1461	1702	3431	3249	3301	388	1717	3109	1611	961	301
CQ22	1311	749	6933	2946	754	3140	1211	3192	1303	3158	957	3107	1332	411	1867	1848	1454	1138	1199	1199	1457	3143	5760	1425	1033	1827	3107	1453	2035	3137	1451	1492	1844	1440	6010	628	3060	1825	1461	1702	3431	3249	3301	388	1717	3109	1611	961	301
CQ25	1311	749	6933	2946	754	3140	1211	3192	1303	3158	957	3107	1332	411	1867	1848	1454	1138	1199	1199	1457	3143	5760	1425	1033	1827	3107	1453	2035	3137	1451	1492	1844	1440	6010	628	3060	1825	1461	1702	3431	3249	3301	388	1717	3109	1611	961	301
CQ26	1311	749	6933	2946	754	3140	1211	3192	1303	3158	957	3107	1332	411	1867	1848	1454	1138	1199	1199	1457	3143	5760	1425	1033	1827	3107	1453	2035	3137	1451	1492	1844	1440	6010	628	3060	1825	1461	1702	3431	3249	3301	388	1717	3109	1611	961	301
CQ28	1311	749	6933	2946	754	3140	1211	3192	1303	3158	957	3107	1332	411	1867	1848	1454	1138	1199	1199	1457	3143	5760	1425	1033	1827	3107	1453	2035	3137	1451	1492	1844	1440	6010	628	3060	1825	1461	1702	3431	3249	3301	388	1717	3109	1611	961	301
CQ29	1311	749	6933	2946	754	3140	1211	3192	1303	3158	957	3107	1332	411	1867	1848	1454	1138	1199	1199	1457	3143	5760	1425	1033	1827	3107	1453	2035	3137	1451	1492	1844	1440	6010	628	3060	1825	1461	1702	3431	3249	3301	388	1717	3109	1611	961	301
CQ30	1311	749	6933	2946	754	3140	1211	3192	1303	3158	957	3107	1332	411	1867	1848	1454	1138	1199	1199	1457	3143	5760	1425	1033	1827	3107	1453	2035	3137	1451	1492	1844	1440	6010	628	3060	1825	1461	1702	3431	3249	3301	388	1717	3109	1611	961	301
CQ32	1311	749	6933	2946	754	3140	1211	3192	1303	3158	957	3107	1332	411	1867	1848	1454	1138	1199	1199	1457	3143	5760	1425	1033	1827	3107	1453	2035	3137	1451	1492	1844	1440	6010	628	3060	1825	1461	1702	3431	3249	3301	388	1717	3109	1611	961	301
CQ33	1311	749	6933	2946	754	3140	1211	3192	1303	3158	957	3107	1332	411	1867	1848	1454	1138	1199	1199	1457	3143	5760	1425	1033	1827	3107	1453	2035	3137	1451	1492	1844	1440	6010	628	3060	1825	1461	1702	3431	3249	3301	388	1717	3109	1611	961	301
CQ34	1311	749	6933	2946	754	3140	1211	3192	1303	3158	957	3107	1332	411	1867	1848	1454	1138	1199	1199	1457	3143	5760	1425	1033	1827	3107	1453	2035	3137	1451	1492	1844	1440	6010	628	3060	1825	1461	1702	3431	3249	3301	388	1717	3109	1611	961	301
CQ35	1311	749	6933	2946	754	3140	1211	3192	1303	3158	957	3107	1332	411	1867	1848	1454	1138	1199	1199	1457	3143	5760	1425	1033	1827	3107	1453	2035	3137	1451	1492	1844	1440	6010	628	3060	1825	1461	1702	3431	3249	3301	388	1717	3109	1611	961	301
HUN29	2876	2956	6856	2068	2961	1563	3033	1585	3113	1453	2939	1398	2881	2990	3657	3042	3002	3003	3023	3023	3008	1471	5654	2939	3014	2869	1785	3004	2901	1453	2987	2977	3038	2948	5853	2852	1874	3014	2986	2927	3525	1598	1773	3009	2835	1446	3053	2891	2958
NMG47	2491	1905	6881	3504	1910	3697	2401	3710	2539	3685	2159	3675	2370	1852	70	2898	2496	2281	2401	2401	2525	3715	5087	2468	2285	2854	3740	2509	2839	3680	2506	2572	2894	2535	5721	1852	3721	2877	2449	2764	3785	3743	3758	1832	2753	3635	2679	2232	1776
NMG49	2491	1905	6881	3504	1910	3697	2401	3710	2539	3685	2159	3675	2370	1852	70	2898	2496	2281	2401	2401	2525	3715	5087	2468	2285	2854	3740	2509	2839	3680	2506	2572	2894	2535	5721	1852	3721	2877	2449	2764	3785	3743	3758	1832	2753	3635	2679	2232	1776
NMG50	2491	1905	6881	3504	1910	3697	2401	3710	2539	3685	2159	3675	2370	1852	70	2898	2496	2281	2401	2401	2525	3715	5087	2468	2285	2854	3740	2509	2839	3680	2506	2572	2894	2535	5721	1852	3721	2877	2449	2764	3785	3743	3758	1832	2753	3635	2679	2232	1776
XD100	1404	1377	6904	2883	1382	3002	1468	3122	1560	3030	1259	3025	1183	1389	2475	1637	1232	1427	1454	1454	1233	3009	5623	231	1320	1744	3020	1241	1841	3012	1199	1380	1635	1225	5922	1481	3029	1616	983	1421	3300	3082	3137	1402	1649	2974	1359	1306	1330
HB24	5819	5843	5970	5909	5848	5761	5816	5824	5837	5836	5820	5818	5845	5881	5666	5794	5848	5828	5812	5812	5871	5874	5247	5853	5862	5826	5894	5857	5830	5843	5850	5811	5790	5851	154	5856	5831	5772	5856	5798	5932	5791	5867	5912	5814	5780	5853	5849	5874
S206	1299	1146	6858	2769	1151	2921	879	3005	1030	2966	643	2922	1113	888	2270	1632	1333	836	867	867	1346	2965	5642	1273	755	1738	2953	1328	1975	2951	1337	1203	1630	1316	5907	1103	2902	1607	1302	1522	3305	3047	3120	901	1641	2915	1490	10	793
SC4	1313	751	6935	2948	756	3143	1213	3194	1305	3160	959	3109	1334	413	1869	1850	1456	1140	1201	1201	1459	3145	5762	1427	1035	1829	3110	1455	2037	3139	1453	1494	1846	1442	6012	630	3062	1827	1463	1704	3433	3251	3303	390	1719	3111	1613	963	303
XD1	5690	5653	6691	5672	5658	5519	5659	5595	5611	5614	5663	5545	5665	5660	5302	5681	5654	5667	5661	5661	5686	5674	4113	5651	5707	5646	5692	5662	5639	5614	5657	5583	5679	5667	5254	5650	5650	5659	5687	5615	5682	5618	5675	5702	5643	5598	5669	5666	5672
XD2	2916	2994	6975	2234	2999	1570	3057	1699	3181	1455	2964	1581	2903	3019	3722	3072	2995	3062	3053	3053	3008	1414	5727	2970	3058	2873	1844	3002	2868	1452	2981	3036	3070	2964	5961	2899	1866	3049	2979	2983	3627	1682	1995	3054	2847	1545	3028	2888	3009
CQ3	932	353	6897	2832	358	3018	1309	3078	1377	3033	1055	3027	1229	584	1756	1831	1073	1221	1297	1297	1082	3055	5660	1286	1143	1758	2986	1068	1928	3012	1063	1095	1827	1054	5943	737	2952	1808	1346	1395	3295	3164	3172	561	1326	3012	1226	1084	516
GS4	1238	675	6882	2862	680	3069	1128	3108	1214	3076	874	3031	1250	301	1751	1768	1381	1057	1116	1116	1384	3067	5687	1337	952	1729	3026	1378	1937	3055	1375	1419	1766	1360	5961	519	2978	1747	1379	1616	3342	3175	3219	278	1628	3031	1536	885	222
HUN50	5691	5654	6690	5673	5659	5520	5660	5596	5612	5615	5664	5546	5666	5661	5303	5682	5655	5668	5662	5662	5687	5675	4112	5652	5708	5647	5693	5663	5640	5615	5658	5584	5680	5668	5253	5651	5651	5660	5688	5616	5683	5619	5676	5703	5644	5599	5670	5667	5673
NMG24	2917	2995	6974	2235	3000	1571	3058	1702	3182	1456	2967	1580	2904	3020	3723	3077	2996	3063	3054	3054	3007	1415	5730	2971	3061	2876	1843	3005	2871	1453	2984	3037	3073	2965	5962	2901	1865	3052	2982	2982	3629	1683	1994	3055	2848	1546	3029	2889	3010
XJ40	5820	5844	5971	5910	5849	5762	5817	5825	5838	5837	5821	5819	5846	5882	5667	5795	5849	5829	5813	5813	5872	5875	5248	5854	5863	5827	5895	5858	5831	5844	5851	5812	5791	5852	155	5857	5832	5773	5857	5799	5933	5792	5868	5913	5815	5781	5854	5850	5875
AH84	2918	2996	6973	2236	3001	1568	3055	1699	3179	1451	2964	1581	2901	3019	3723	3076	2997	3058	3051	3051	3008	1412	5729	2972	3058	2873	1844	3002	2868	1448	2981	3038	3074	2966	5959	2901	1866	3049	2979	2983	3627	1682	1995	3052	2847	1543	3026	2886	3009
HUN18	5692	5655	6691	5674	5660	5521	5661	5597	5613	5616	5665	5547	5667	5662	5304	5683	5656	5669	5663	5663	5688	5676	4113	5653	5709	5648	5694	5664	5641	5616	5659	5585	5681	5669	5254	5652	5652	5661	5689	5617	5684	5620	5677	5704	5645	5600	5671	5668	5674
S196	931	352	6898	2831	357	3017	1308	3077	1376	3032	1054	3026	1228	583	1757	1830	1072	1220	1296	1296	1081	3054	5659	1285	1142	1759	2985	1067	1929	3011	1064	1096	1826	1053	5942	736	2951	1807	1345	1394	3294	3163	3171	560	1327	3011	1225	1083	515
CQ59	934	355	6899	2834	360	3020	1311	3080	1379	3035	1057	3029	1231	586	1756	1833	1075	1223	1299	1299	1084	3057	5662	1288	1145	1760	2988	1070	1930	3014	1065	1097	1829	1056	5945	739	2954	1810	1348	1397	3297	3166	3174	563	1328	3014	1228	1086	518
FY241	3067	3083	6906	2374	3088	1660	3160	1584	3250	1652	3074	1582	3064	3142	3792	3222	3158	3134	3146	3146	3182	1557	5665	3104	3139	3009	1960	3162	2983	1663	3161	3161	3218	3127	5918	2956	2074	3194	3138	3111	3637	1794	1982	3161	2969	1727	3238	3000	3138
HUNJ27	932	353	6899	2832	358	3018	1309	3078	1377	3033	1055	3027	1229	584	1758	1831	1073	1221	1297	1297	1082	3055	5660	1286	1143	1760	2986	1068	1930	3012	1065	1097	1827	1054	5943	737	2952	1808	1346	1395	3295	3164	3171	561	1328	3012	1226	1084	516
NMG42	928	349	6896	2828	354	3016	1307	3074	1375	3031	1051	3025	1227	582	1752	1827	1069	1219	1295	1295	1080	3053	5658	1284	1139	1758	2984	1064	1928	3010	1061	1093	1823	1050	5941	733	2950	1806	1344	1393	3291	3161	3170	559	1324	3010	1224	1082	514
NMG6	928	349	6896	2828	354	3016	1307	3074	1375	3031	1051	3025	1227	582	1752	1827	1069	1219	1295	1295	1080	3053	5658	1284	1139	1758	2984	1064	1928	3010	1061	1093	1823	1050	5941	733	2950	1806	1344	1393	3291	3161	3170	559	1324	3010	1224	1082	514
QH3	3064	3161	6754	2337	3166	1908	3248	1804	3366	1755	3151	1878	3077	3175	3791	3205	3178	3135	3236	3236	3195	1786	5752	3140	3215	3006	2282	3183	3053	1775	3172	3159	3201	3156	5953	3064	2323	3180	3193	3121	3752	1866	16	3204	3017	1327	3237	3114	3172
S77	5693	5656	6694	5675	5661	5522	5662	5598	5614	5617	5666	5548	5668	5663	5305	5684	5657	5670	5664	5664	5689	5677	4116	5654	5710	5649	5695	5665	5642	5617	5660	5586	5682	5670	5257	5653	5653	5662	5690	5618	5685	5621	5678	5705	5646	5601	5672	5669	5675
GS93	929	350	6898	2829	355	3017	1308	3075	1376	3032	1052	3026	1228	583	1753	1828	1070	1220	1296	1296	1081	3054	5659	1285	1140	1759	2985	1065	1929	3011	1062	1094	1824	1051	5942	734	2951	1807	1345	1394	3292	3162	3171	560	1325	3011	1225	1083	515
NMG10	5823	5847	5974	5913	5852	5765	5820	5828	5841	5840	5824	5822	5849	5885	5670	5798	5852	5832	5816	5816	5875	5878	5251	5857	5866	5830	5898	5861	5834	5847	5854	5815	5794	5855	158	5860	5835	5776	5860	5802	5936	5795	5871	5916	5818	5784	5857	5853	5878
XJ48	3065	3162	6755	2338	3167	1909	3249	1805	3369	1756	3154	1879	3080	3176	3792	3208	3181	3138	3237	3237	3198	1787	5753	3141	3218	3009	2283	3186	3056	1776	3175	3160	3204	3159	5954	3065	2326	3183	3196	3122	3753	1867	17	3205	3018	1328	3240	3115	3173
CQ69	869	293	6925	2829	298	3012	1339	3063	1426	3040	1083	3018	1227	610	1834	1853	1039	1265	1327	1327	1046	3060	5648	1308	1185	1778	2995	1030	1923	3019	1029	1055	1849	1068	5949	761	2945	1832	1350	1357	3293	3159	3154	589	1286	3002	1190	1110	552
E_coli_RXD10	2531	1945	6874	3546	1950	3744	2444	3750	2586	3725	2202	3722	2413	1886	15	2931	2535	2320	2444	2444	2564	3760	5128	2507	2322	2884	3782	2548	2898	3720	2545	2619	2927	2568	5735	1886	3763	2910	2488	2803	3827	3785	3800	1866	2789	3682	2718	2275	1810
E_coli_RXD5	2531	1945	6874	3546	1950	3744	2444	3750	2586	3725	2202	3722	2413	1886	15	2931	2535	2320	2444	2444	2564	3760	5128	2507	2322	2884	3782	2548	2898	3720	2545	2619	2927	2568	5735	1886	3763	2910	2488	2803	3827	3785	3800	1866	2789	3682	2718	2275	1810
GS29	3066	3163	6754	2339	3168	1910	3250	1806	3370	1757	3155	1880	3081	3177	3793	3209	3182	3139	3238	3238	3199	1788	5754	3142	3219	3010	2284	3187	3057	1777	3176	3161	3205	3160	5955	3066	2327	3184	3197	3123	3754	1870	18	3206	3019	1329	3241	3116	3174
HLJ64	934	355	6901	2834	360	3020	1311	3080	1379	3035	1057	3029	1231	586	1760	1833	1075	1223	1299	1299	1084	3057	5662	1288	1145	1762	2988	1070	1932	3014	1067	1099	1829	1056	5945	739	2954	1810	1348	1397	3297	3166	3174	563	1330	3014	1228	1086	518
HUN77	934	355	6901	2834	360	3020	1311	3080	1379	3035	1057	3029	1231	586	1760	1833	1075	1223	1299	1299	1084	3057	5662	1288	1145	1762	2988	1070	1932	3014	1067	1099	1829	1056	5945	739	2954	1810	1348	1397	3297	3166	3174	563	1330	3014	1228	1086	518
S91	1435	1521	6999	2815	1526	3042	1566	3000	1685	2995	1379	2942	1257	1422	2675	1707	1358	1585	1554	1554	1379	2919	5675	1290	1401	1731	2937	1347	1917	2983	1360	1450	1705	1355	5969	1550	2946	1684	1263	1453	3361	3013	3115	1443	1693	2957	1503	1392	1360
SC10	934	355	6901	2834	360	3020	1311	3080	1379	3035	1057	3029	1231	586	1760	1833	1075	1223	1299	1299	1084	3057	5662	1288	1145	1762	2988	1070	1932	3014	1067	1099	1829	1056	5945	739	2954	1810	1348	1397	3297	3166	3174	563	1330	3014	1228	1086	518
SD35	2920	2998	6978	2238	3003	1573	3060	1704	3184	1458	2969	1583	2906	3022	3726	3079	2999	3065	3056	3056	3010	1417	5732	2974	3063	2878	1846	3007	2873	1455	2986	3040	3076	2968	5964	2903	1868	3054	2984	2985	3630	1685	1997	3057	2851	1548	3031	2891	3012
SD36	2920	2998	6978	2238	3003	1573	3060	1704	3184	1458	2969	1583	2906	3022	3726	3079	2999	3065	3056	3056	3010	1417	5732	2974	3063	2878	1846	3007	2873	1455	2986	3040	3076	2968	5964	2903	1868	3054	2984	2985	3630	1685	1997	3057	2851	1548	3031	2891	3012
SD37	2921	2999	6978	2239	3004	1573	3060	1704	3184	1458	2969	1584	2906	3022	3727	3077	3000	3065	3056	3056	3011	1417	5730	2973	3063	2876	1847	3007	2871	1455	2986	3041	3075	2969	5964	2904	1869	3052	2982	2986	3632	1685	1998	3057	2852	1548	3031	2891	3012
SD38	2920	2998	6978	2238	3003	1573	3060	1704	3184	1458	2969	1583	2906	3022	3726	3079	2999	3065	3056	3056	3010	1417	5732	2974	3063	2878	1846	3007	2873	1455	2986	3040	3076	2968	5964	2903	1868	3054	2984	2985	3630	1685	1997	3057	2851	1548	3031	2891	3012
HUBS28	935	354	6902	2835	359	3017	1310	3079	1378	3034	1056	3028	1230	585	1761	1830	1076	1222	1298	1298	1085	3056	5661	1289	1144	1759	2989	1071	1929	3013	1066	1100	1826	1055	5944	740	2955	1807	1347	1394	3296	3165	3175	562	1327	3015	1229	1087	519
JX45	2771	2886	7004	18	2891	2232	2893	2143	3077	2122	2833	2243	2735	2888	3546	2951	2849	2924	2889	2889	2873	2125	5767	2884	2930	2674	2377	2858	2753	2111	2854	2918	2947	2826	6000	2835	2652	2926	2858	2783	3564	2137	2347	2911	2760	2199	2923	2775	2839
S75	931	352	6900	2831	357	3019	1310	3077	1378	3034	1054	3028	1230	585	1755	1830	1072	1222	1298	1298	1083	3056	5661	1287	1142	1761	2987	1067	1931	3013	1064	1096	1826	1053	5944	736	2953	1809	1347	1396	3294	3164	3173	562	1327	3013	1227	1085	517
SD30	2921	2999	6979	2239	3004	1574	3061	1705	3185	1459	2970	1584	2907	3023	3727	3080	3000	3066	3057	3057	3011	1418	5733	2975	3064	2879	1847	3008	2874	1456	2987	3041	3077	2969	5965	2904	1869	3055	2985	2986	3631	1686	1998	3058	2852	1549	3032	2892	3013
SC3	936	357	6903	2836	362	3022	1313	3082	1381	3037	1059	3031	1233	588	1762	1835	1077	1225	1301	1301	1086	3059	5664	1290	1147	1764	2990	1072	1934	3016	1069	1101	1831	1058	5947	741	2956	1812	1350	1399	3299	3168	3176	565	1332	3016	1230	1088	520
CQ78	2922	3000	6979	2240	3005	1574	3061	1703	3185	1459	2968	1587	2907	3025	3728	3080	3001	3066	3057	3057	3014	1418	5735	2978	3062	2879	1850	3006	2874	1456	2985	3042	3078	2970	5965	2905	1872	3055	2985	2989	3631	1688	2001	3058	2853	1549	3032	2892	3015
XJ32	2493	1901	6881	3506	1906	3699	2399	3712	2537	3687	2157	3679	2370	1848	76	2896	2494	2279	2399	2399	2525	3717	5091	2466	2283	2850	3744	2509	2835	3682	2506	2572	2892	2535	5721	1854	3725	2875	2447	2762	3787	3745	3760	1828	2751	3637	2679	2232	1776
AH15	3908	3842	6978	3920	3847	3890	3733	3888	3952	3968	3819	3959	3870	3868	4427	3944	3814	3869	3737	3737	3843	3961	5809	3860	3830	3926	3921	3825	3918	3969	3814	3851	3942	3790	5989	3834	3954	3918	3843	3623	4218	3949	4048	3899	3851	3840	3808	3857	3893
CQ36	2917	2993	6972	2235	2998	1567	3054	1698	3178	1452	2963	1580	2900	3016	3723	3075	2996	3059	3050	3050	3007	1411	5728	2971	3057	2872	1843	3001	2867	1449	2980	3037	3073	2965	5958	2898	1865	3048	2978	2982	3626	1681	1994	3049	2848	1542	3025	2885	3008
NMG12	2966	2974	6893	2099	2979	1583	3079	1658	3207	115	2994	1578	2957	3019	3707	3146	3065	3078	3075	3075	3063	1345	5674	3016	3071	2973	1890	3067	2973	24	3029	3090	3144	3057	5912	2925	1950	3117	3086	3009	3598	1635	1775	3038	2958	1561	3103	2943	3016
S61	1461	1368	6883	2929	1373	3085	1157	3014	1300	3073	955	2998	1348	1172	2356	1690	1500	1166	1145	1145	1496	2977	5701	1438	1041	1877	2995	1496	2015	3048	1475	1169	1688	1347	5944	1322	2967	1669	1481	1669	3355	3106	3151	1207	1779	2977	1666	992	1131
S79	1461	1368	6883	2929	1373	3085	1157	3014	1300	3073	955	2998	1348	1172	2356	1690	1500	1166	1145	1145	1496	2977	5701	1438	1041	1877	2995	1496	2015	3048	1475	1169	1688	1347	5944	1322	2967	1669	1481	1669	3355	3106	3151	1207	1779	2977	1666	992	1131
SD5	3908	3842	6980	3920	3847	3890	3733	3888	3952	3968	3819	3959	3870	3868	4426	3944	3814	3869	3737	3737	3843	3961	5809	3860	3830	3926	3921	3825	3918	3969	3814	3851	3942	3790	5989	3834	3954	3918	3843	3623	4218	3949	4048	3899	3851	3840	3808	3857	3893
CQ12	1267	1119	6887	2833	1124	2974	397	3050	990	3028	20	2970	1182	883	2203	1556	1359	627	381	381	1360	2984	5647	1252	444	1658	2995	1354	1814	3007	1345	1257	1554	1339	5882	1057	2955	1535	1323	1476	3282	3068	3165	896	1609	2962	1474	649	794
GS3	2922	3002	6978	2240	3007	1574	3059	1705	3185	1459	2968	1585	2905	3023	3728	3082	3003	3064	3055	3055	3014	1418	5735	2978	3062	2877	1850	3008	2874	1456	2987	3044	3080	2970	5964	2905	1872	3055	2985	2989	3633	1688	2001	3056	2854	1549	3031	2890	3013
HUBS21	3050	3066	6889	2357	3071	1643	3143	1567	3233	1635	3057	1565	3047	3125	3776	3205	3141	3118	3129	3129	3165	1540	5649	3087	3120	2992	1943	3145	2966	1646	3144	3144	3201	3110	5902	2939	2057	3177	3121	3094	3620	1777	1966	3144	2952	1710	3221	2983	3121
HUN20	2920	2988	6975	2232	2993	1554	3049	1695	3173	1473	2958	1585	2899	3021	3718	3080	2989	3076	3045	3045	3000	1412	5735	2964	3052	2869	1848	2996	2874	1460	2975	3042	3078	2960	5963	2893	1858	3055	2977	2987	3621	1678	1999	3046	2853	1545	3020	2880	3001
LN35	2888	2968	6866	2080	2973	1573	3043	1595	3123	1463	2949	1410	2891	3000	3669	3052	3014	3013	3033	3033	3020	1481	5664	2951	3024	2879	1797	3014	2911	1463	2997	2989	3050	2960	5863	2863	1886	3024	2996	2939	3536	1608	1785	3019	2847	1456	3063	2901	2968
NMG39	2858	2896	6934	2199	2901	1776	2992	1665	3094	1637	2895	1763	2872	2958	3627	3006	2948	3018	2980	2980	2973	1697	5721	2914	2951	2832	2185	2949	2875	1639	2944	2919	3004	2974	5908	2838	2154	2981	2992	2988	3630	1721	605	2971	2848	1268	3011	2883	2941
AH10	1232	1267	6877	2751	1272	2879	1705	2935	1744	2965	1600	2866	1611	1615	2781	1983	1416	1666	1693	1693	1431	2928	5632	1615	1628	1513	2884	1409	1693	2962	1404	1352	1979	1441	5875	1775	2854	1961	1600	1429	3357	2920	3020	1648	21	2891	1373	1640	1564
AH13	2968	2976	6895	2101	2981	1585	3081	1660	3209	117	2996	1580	2959	3021	3709	3148	3067	3080	3077	3077	3065	1347	5676	3018	3073	2975	1892	3069	2975	26	3031	3092	3146	3059	5914	2927	1952	3119	3088	3011	3600	1637	1777	3040	2960	1563	3105	2945	3018
AH37	1232	1267	6877	2751	1272	2879	1705	2935	1744	2965	1600	2866	1611	1615	2781	1983	1416	1666	1693	1693	1431	2928	5632	1615	1628	1513	2884	1409	1693	2962	1404	1352	1979	1441	5875	1775	2854	1961	1600	1429	3357	2920	3020	1648	21	2891	1373	1640	1564
AH8	1232	1267	6877	2751	1272	2879	1705	2935	1744	2965	1600	2866	1611	1615	2781	1983	1416	1666	1693	1693	1431	2928	5632	1615	1628	1513	2884	1409	1693	2962	1404	1352	1979	1441	5875	1775	2854	1961	1600	1429	3357	2920	3020	1648	21	2891	1373	1640	1564
CQ2	1268	1120	6888	2834	1125	2975	398	3051	991	3029	21	2971	1183	884	2204	1557	1360	628	382	382	1361	2985	5648	1253	445	1659	2996	1355	1815	3008	1346	1258	1555	1340	5883	1058	2956	1536	1324	1477	3283	3069	3166	897	1610	2963	1475	650	795
JX26	2919	2997	6974	2237	3002	1569	3056	1700	3180	1456	2965	1582	2902	3020	3725	3075	2996	3061	3052	3052	3007	1413	5730	2971	3059	2872	1843	3001	2867	1453	2980	3039	3073	2965	5959	2901	1865	3048	2978	2982	3626	1683	1994	3053	2848	1542	3025	2887	3010
CQ80	1233	1268	6878	2752	1273	2880	1706	2935	1745	2966	1601	2867	1612	1616	2782	1984	1417	1667	1694	1694	1432	2929	5635	1616	1629	1514	2885	1410	1694	2963	1405	1353	1980	1442	5878	1776	2855	1962	1601	1430	3358	2921	3021	1649	22	2892	1374	1641	1565
HUN127	2927	3005	6979	2245	3010	1578	3065	1709	3189	1463	2974	1590	2911	3029	3731	3086	3004	3070	3061	3061	3015	1422	5739	2981	3068	2881	1853	3010	2876	1460	2987	3045	3083	2975	5969	2910	1875	3059	2989	2992	3635	1692	2004	3062	2856	1553	3034	2896	3019
HUN80	1584	1144	6883	2881	1149	3080	1328	3067	1589	3034	1421	3003	1209	903	2314	1966	1698	1556	1316	1316	1703	3029	5672	1622	1417	1949	2992	1693	2095	3016	1680	1652	1964	1430	5930	1105	3008	1943	1535	1376	3335	3117	3149	920	1811	2992	1735	1424	1008
YN33	2916	2987	6969	2246	2992	1574	3047	1709	3171	1463	2956	1585	2893	3016	3721	3062	2996	3052	3043	3043	2992	1424	5731	2963	3050	2872	1848	2990	2867	1460	2979	3022	3058	2954	5959	2900	1868	3037	2969	2969	3626	1690	2001	3051	2837	1555	3014	2880	3003
CQ73	1234	1269	6879	2753	1274	2881	1707	2936	1746	2967	1602	2868	1613	1617	2783	1985	1418	1668	1695	1695	1433	2930	5636	1617	1630	1515	2886	1411	1695	2964	1406	1354	1981	1443	5879	1777	2856	1963	1602	1431	3359	2922	3022	1650	23	2893	1375	1642	1566
CQ75	1234	1269	6879	2753	1274	2881	1707	2936	1746	2967	1602	2868	1613	1617	2783	1985	1418	1668	1695	1695	1433	2930	5636	1617	1630	1515	2886	1411	1695	2964	1406	1354	1981	1443	5879	1777	2856	1963	1602	1431	3359	2922	3022	1650	23	2893	1375	1642	1566
LN42	3053	3069	6893	2358	3074	1645	3145	1569	3235	1637	3059	1568	3049	3127	3777	3207	3142	3120	3131	3131	3168	1542	5649	3090	3124	2994	1944	3147	2968	1648	3146	3147	3204	3111	5904	2941	2058	3179	3123	3097	3621	1779	1969	3146	2955	1712	3223	2985	3123
SD23	1461	1368	6881	2929	1373	3083	1155	3012	1298	3071	953	2998	1346	1172	2356	1690	1500	1164	1143	1143	1496	2975	5701	1438	1039	1875	2995	1494	2013	3046	1473	1169	1688	1347	5942	1322	2967	1667	1479	1669	3353	3106	3151	1205	1779	2975	1664	990	1131
SHB15	1234	1269	6879	2753	1274	2881	1707	2937	1746	2967	1602	2868	1613	1617	2781	1985	1418	1668	1695	1695	1433	2930	5636	1617	1630	1515	2886	1411	1695	2964	1406	1354	1981	1443	5879	1777	2856	1963	1602	1431	3357	2922	3022	1650	23	2893	1375	1642	1566
AH16	1235	1270	6880	2754	1275	2882	1708	2938	1747	2968	1603	2869	1614	1618	2784	1986	1419	1669	1696	1696	1434	2931	5637	1618	1631	1516	2887	1412	1696	2965	1407	1355	1982	1444	5880	1778	2857	1964	1603	1432	3360	2923	3023	1651	24	2894	1376	1643	1567
AH27	1235	1270	6880	2754	1275	2882	1708	2938	1747	2968	1603	2869	1614	1618	2784	1986	1419	1669	1696	1696	1434	2931	5637	1618	1631	1516	2887	1412	1696	2965	1407	1355	1982	1444	5880	1778	2857	1964	1603	1432	3360	2923	3023	1651	24	2894	1376	1643	1567
AH4	1235	1270	6880	2754	1275	2882	1708	2938	1747	2968	1603	2869	1614	1618	2784	1986	1419	1669	1696	1696	1434	2931	5637	1618	1631	1516	2887	1412	1696	2965	1407	1355	1982	1444	5880	1778	2857	1964	1603	1432	3360	2923	3023	1651	24	2894	1376	1643	1567
AH40	1235	1270	6880	2754	1275	2882	1708	2938	1747	2968	1603	2869	1614	1618	2784	1986	1419	1669	1696	1696	1434	2931	5637	1618	1631	1516	2887	1412	1696	2965	1407	1355	1982	1444	5880	1778	2857	1964	1603	1432	3360	2923	3023	1651	24	2894	1376	1643	1567
AH48	2850	2968	6912	2318	2973	1722	3025	1598	3085	1669	2891	1803	2880	2976	3659	3092	3015	2996	3021	3021	3012	1632	5620	2991	2993	2902	1999	3016	2882	1663	2985	2982	3090	2959	5873	2885	2086	3065	2985	2981	3623	1704	1880	3005	2852	1557	3095	2854	2959
FY262	1797	1809	6924	2939	1814	3118	1761	3175	1893	3154	1544	3104	1759	1761	2921	30	1693	1636	1747	1747	1703	3093	5666	1626	1574	1698	3144	1685	1839	3143	1680	1796	28	1801	5848	1855	3091	61	1675	1816	3409	3167	3207	1796	1980	3087	1741	1626	1732
JX13	943	364	6906	2837	369	3025	1320	3081	1388	3036	1066	3032	1238	595	1769	1840	1080	1232	1308	1308	1093	3058	5665	1297	1154	1761	2993	1079	1931	3017	1072	1108	1836	1063	5948	746	2961	1817	1357	1404	3298	3169	3177	572	1329	3017	1237	1093	525
JX16	943	364	6906	2837	369	3025	1320	3081	1388	3036	1066	3032	1238	595	1769	1840	1080	1232	1308	1308	1093	3058	5665	1297	1154	1761	2993	1079	1931	3017	1072	1108	1836	1063	5948	746	2961	1817	1357	1404	3298	3169	3177	572	1329	3017	1237	1093	525
QH18	2918	2989	6973	2248	2994	1576	3049	1711	3173	1465	2958	1587	2895	3018	3723	3064	2998	3054	3045	3045	2994	1426	5733	2965	3052	2874	1850	2992	2869	1462	2981	3024	3060	2956	5961	2902	1870	3039	2971	2971	3628	1692	2003	3053	2839	1557	3016	2882	3005
GS47	2926	3004	6982	2244	3009	1578	3065	1707	3189	1463	2972	1591	2911	3029	3732	3084	3005	3070	3061	3061	3018	1422	5737	2982	3066	2883	1854	3010	2878	1460	2989	3046	3082	2974	5967	2909	1876	3059	2989	2993	3635	1692	2005	3062	2857	1553	3036	2896	3019
SX54	1795	1809	6918	2937	1814	3114	1757	3173	1889	3150	1544	3098	1753	1759	2918	40	1689	1632	1743	1743	1697	3087	5660	1620	1572	1696	3140	1681	1835	3139	1678	1792	38	1799	5841	1853	3087	57	1671	1812	3407	3161	3201	1794	1980	3081	1735	1620	1728
FY239	2946	3013	6948	2204	3018	1725	3127	1611	3235	1599	3032	1685	2978	3059	3743	3114	3062	3081	3115	3115	3085	1618	5742	3024	3093	2899	2113	3062	2934	1609	3058	3057	3112	3030	5918	2949	2120	3087	3101	3030	3642	1673	469	3086	2879	1172	3123	3024	3056
S181	1652	1540	6881	2778	1545	2854	1358	2800	1553	2789	1158	2736	1489	1404	2420	1896	1683	1369	1346	1346	1681	2698	5690	1619	1290	2043	2787	1685	2151	2768	1654	1386	1892	1499	5926	1378	2697	1873	1638	1822	3398	2866	2889	1419	1963	2691	1853	1233	1345
BJ32	1165	575	6885	2876	580	3037	1125	3050	1241	3034	871	3009	1249	30	1875	1761	1363	1053	1113	1113	1378	3034	5651	1336	952	1711	3010	1374	1898	3020	1361	1411	1759	1410	5943	389	2964	1738	1354	1595	3295	3170	3175	133	1612	2984	1530	882	247
CQ66	1054	1006	6917	2835	1011	2986	1536	3063	1599	3041	1327	3013	1231	1354	2522	1679	150	1502	1524	1524	126	3039	5602	1234	1276	1844	2991	137	1831	3018	106	887	1677	968	5887	1445	3002	1655	1278	1086	3298	3103	3158	1369	1412	2986	332	1323	1273
HUN101	2973	2991	6901	2105	2996	1574	3086	1693	3202	194	3003	1581	2966	3030	3725	3157	3066	3071	3082	3082	3066	1326	5692	3021	3064	2982	1887	3068	2982	163	3032	3095	3155	3064	5925	2946	1946	3130	3089	3000	3604	1621	1773	3055	2953	1557	3122	2955	3033
S70	1377	1408	6893	2745	1413	2964	1551	3012	1661	3010	1336	2927	285	1393	2538	1814	1270	1454	1537	1537	1273	2978	5643	1185	1384	1790	2920	1263	1954	2991	1255	1417	1812	439	5891	1472	2962	1793	1045	1161	3216	3008	3114	1398	1672	2910	1399	1289	1310
FY246	1359	752	6927	3046	757	3163	1376	3186	1476	3174	1122	3151	1425	405	1847	1994	1573	1308	1364	1364	1596	3180	5469	1535	1207	1934	3130	1581	2106	3153	1571	1647	1990	1613	5941	562	3066	1971	1565	1809	3398	3286	3319	384	1835	3127	1742	1123	458
FJ26	1235	672	6875	2857	677	3064	1125	3103	1209	3071	871	3022	1245	298	1748	1767	1378	1052	1113	1113	1381	3062	5682	1334	947	1726	3023	1373	1934	3050	1370	1416	1765	1357	5954	516	2975	1742	1374	1613	3339	3172	3214	273	1627	3026	1531	880	219
FJ38	1235	672	6875	2857	677	3064	1125	3103	1209	3071	871	3022	1245	298	1748	1767	1378	1052	1113	1113	1381	3062	5682	1334	947	1726	3023	1373	1934	3050	1370	1416	1765	1357	5954	516	2975	1742	1374	1613	3339	3172	3214	273	1627	3026	1531	880	219
FY207	1360	753	6928	3047	758	3164	1377	3187	1477	3175	1123	3152	1426	406	1848	1995	1574	1309	1365	1365	1597	3181	5470	1536	1208	1935	3131	1582	2107	3154	1572	1648	1991	1614	5942	563	3067	1972	1566	1810	3399	3287	3320	385	1836	3128	1743	1124	459
FY48	2501	1905	6885	3510	1910	3699	2403	3712	2545	3687	2161	3679	2376	1856	90	2898	2500	2283	2403	2403	2529	3717	5093	2470	2287	2838	3746	2513	2823	3682	2506	2576	2894	2541	5723	1862	3727	2877	2453	2768	3783	3745	3762	1836	2741	3639	2683	2240	1784
LN69	2923	2991	6976	2231	2996	1556	3050	1695	3174	1472	2959	1586	2898	3024	3719	3083	2992	3077	3046	3046	3003	1410	5736	2967	3053	2868	1848	2997	2875	1459	2976	3045	3081	2963	5960	2896	1859	3056	2974	2990	3620	1678	2001	3047	2856	1545	3021	2881	3004
AH12	2894	2930	6923	2615	2935	1997	3026	1974	3110	1933	2941	1869	2937	2963	3751	3088	3002	3031	3030	3030	3029	1980	5716	2999	2998	2871	1465	3005	2858	1943	3006	3018	3084	2946	5930	2876	79	3061	3022	2979	3684	2093	2310	2980	2850	1976	3091	2895	2930
AH36	2894	2930	6923	2615	2935	1997	3026	1974	3110	1933	2941	1869	2937	2963	3751	3088	3002	3031	3030	3030	3029	1980	5716	2999	2998	2871	1465	3005	2858	1943	3006	3018	3084	2946	5930	2876	79	3061	3022	2979	3684	2093	2310	2980	2850	1976	3091	2895	2930
QH13	2924	2992	6977	2232	2997	1557	3051	1696	3175	1473	2960	1587	2899	3025	3720	3084	2993	3078	3047	3047	3004	1411	5737	2968	3054	2869	1849	2998	2876	1460	2977	3046	3082	2964	5961	2897	1860	3057	2975	2991	3623	1679	2002	3048	2857	1546	3022	2882	3005
SAX15	3061	3077	6901	2366	3082	1655	3153	1577	3243	1647	3067	1576	3057	3135	3783	3215	3150	3128	3139	3139	3176	1552	5657	3098	3132	3000	1952	3155	2974	1658	3152	3153	3212	3119	5912	2949	2066	3187	3131	3105	3629	1787	1979	3154	2961	1720	3231	2993	3131
SAX4	940	357	6905	2837	362	3024	1327	3084	1395	3039	1071	3031	1247	590	1756	1847	1075	1239	1315	1315	1100	3062	5663	1292	1159	1766	2990	1084	1936	3019	1073	1113	1843	1070	5951	740	2958	1826	1364	1413	3297	3170	3178	567	1344	3019	1244	1100	530
SD21	1798	1810	6923	2939	1815	3117	1760	3176	1892	3155	1545	3103	1758	1762	2921	43	1692	1635	1746	1746	1702	3092	5664	1625	1573	1699	3145	1684	1838	3144	1679	1795	41	1802	5847	1856	3092	60	1674	1815	3410	3167	3208	1797	1981	3086	1740	1625	1733
GX38	2925	2993	6978	2233	2998	1558	3052	1697	3176	1474	2961	1588	2900	3026	3721	3085	2994	3079	3048	3048	3005	1412	5738	2969	3055	2870	1850	2999	2877	1461	2978	3047	3083	2965	5962	2898	1861	3058	2976	2992	3622	1680	2003	3049	2858	1547	3023	2883	3006
JX10	2501	1905	6887	3510	1910	3699	2403	3712	2545	3687	2161	3679	2376	1856	92	2898	2500	2283	2403	2403	2529	3717	5093	2470	2287	2840	3746	2513	2825	3682	2508	2578	2894	2541	5723	1862	3727	2877	2453	2768	3783	3745	3762	1836	2743	3639	2683	2240	1784
SH30	2925	2993	6978	2233	2998	1558	3052	1697	3176	1474	2961	1588	2900	3026	3721	3085	2994	3079	3048	3048	3005	1412	5738	2969	3055	2870	1850	2999	2877	1461	2978	3047	3083	2965	5962	2898	1861	3058	2976	2992	3622	1680	2003	3049	2858	1547	3023	2883	3006
HUN89	2504	1908	6888	3513	1913	3702	2406	3715	2548	3690	2164	3682	2379	1859	93	2901	2503	2286	2406	2406	2532	3720	5096	2473	2290	2841	3749	2516	2826	3685	2509	2579	2897	2544	5726	1865	3730	2880	2456	2771	3786	3748	3765	1839	2744	3642	2686	2243	1787
FY229	3065	3081	6905	2370	3086	1659	3157	1581	3245	1651	3071	1580	3061	3139	3787	3219	3154	3132	3143	3143	3180	1556	5661	3102	3136	3004	1956	3159	2978	1662	3156	3157	3216	3123	5916	2953	2070	3191	3135	3109	3633	1791	1983	3158	2965	1724	3235	2997	3135
S192	3065	3081	6905	2370	3086	1659	3157	1581	3245	1651	3071	1580	3061	3139	3787	3219	3154	3132	3143	3143	3180	1556	5661	3102	3136	3004	1956	3159	2978	1662	3156	3157	3216	3123	5916	2953	2070	3191	3135	3109	3633	1791	1983	3158	2965	1724	3235	2997	3135
S198	3065	3081	6905	2370	3086	1659	3157	1581	3245	1651	3071	1580	3061	3139	3787	3219	3154	3132	3143	3143	3180	1556	5661	3102	3136	3004	1956	3159	2978	1662	3156	3157	3216	3123	5916	2953	2070	3191	3135	3109	3633	1791	1983	3158	2965	1724	3235	2997	3135
S208	3065	3081	6905	2370	3086	1659	3157	1581	3245	1651	3071	1580	3061	3139	3787	3219	3154	3132	3143	3143	3180	1556	5661	3102	3136	3004	1956	3159	2978	1662	3156	3157	3216	3123	5916	2953	2070	3191	3135	3109	3633	1791	1983	3158	2965	1724	3235	2997	3135
XD37	940	375	6904	2818	380	3008	1327	3068	1397	3017	1077	3015	1241	582	1780	1841	1093	1207	1315	1315	1102	3045	5658	1308	1163	1762	2972	1088	1928	3004	1085	1105	1837	1066	5947	759	2942	1818	1366	1403	3299	3152	3160	583	1332	3000	1246	1104	538
S56	1474	1363	6886	2934	1368	3088	1150	3025	1293	3086	948	3013	1349	1187	2349	1707	1493	1181	1138	1138	1489	2988	5708	1431	1034	1884	3008	1487	2030	3061	1468	1184	1705	1348	5949	1315	2970	1684	1474	1684	3352	3111	3166	1200	1796	2990	1657	983	1124
SD11	2505	1909	6887	3514	1914	3701	2405	3716	2547	3689	2165	3681	2378	1858	96	2902	2504	2285	2405	2405	2531	3719	5095	2472	2291	2842	3748	2517	2827	3684	2512	2582	2898	2545	5725	1866	3729	2879	2455	2770	3787	3748	3764	1838	2747	3641	2685	2242	1786
XD3	2501	1915	6891	3511	1920	3705	2399	3714	2541	3693	2157	3685	2370	1866	94	2896	2508	2279	2399	2399	2521	3720	5100	2478	2283	2858	3748	2505	2843	3687	2512	2568	2892	2535	5729	1865	3729	2875	2449	2766	3791	3748	3764	1846	2747	3640	2675	2232	1780
GS86	2500	1914	6892	3510	1919	3704	2398	3713	2540	3692	2156	3684	2369	1865	97	2895	2507	2278	2398	2398	2520	3719	5099	2477	2282	2859	3747	2504	2844	3686	2513	2569	2891	2534	5728	1864	3728	2874	2448	2765	3790	3747	3763	1845	2748	3639	2674	2231	1779
JL33	2922	2966	6964	2265	2971	1589	3080	1652	3180	1467	2992	1547	2908	3024	3763	3083	3000	3039	3068	3068	3018	1468	5742	3023	3058	2866	1767	3004	2860	1481	2992	3049	3079	2981	5975	2863	1953	3060	3012	2949	3598	1694	1871	3049	2888	1610	3065	2920	3008
SD15	2900	2936	6929	2621	2941	2003	3032	1980	3116	1939	2947	1875	2943	2969	3757	3094	3008	3037	3036	3036	3035	1986	5722	3005	3004	2875	1471	3011	2864	1949	3012	3024	3090	2952	5936	2882	85	3067	3028	2985	3690	2099	2316	2986	2856	1982	3097	2901	2936
GS8	2501	1915	6887	3511	1920	3701	2397	3712	2539	3687	2157	3679	2368	1864	98	2894	2508	2277	2397	2397	2521	3716	5094	2476	2283	2848	3746	2507	2833	3681	2510	2572	2890	2535	5723	1865	3727	2871	2447	2762	3787	3745	3762	1844	2739	3638	2675	2232	1778
HUN94	1350	747	6915	3025	752	3151	1373	3165	1475	3153	1119	3132	1404	414	1836	1981	1564	1307	1361	1361	1587	3161	5459	1526	1206	1916	3118	1572	2101	3132	1562	1638	1977	1604	5931	554	3054	1958	1554	1796	3392	3265	3302	393	1828	3108	1733	1120	467
S158	1460	1544	7000	2828	1549	3047	1573	3009	1683	3002	1394	2953	1280	1445	2702	1712	1371	1600	1561	1561	1392	2926	5677	1310	1416	1736	2950	1360	1924	2990	1371	1475	1710	1378	5974	1575	2962	1687	1280	1459	3372	3012	3124	1466	1704	2966	1510	1417	1385
SH68	2931	2999	6983	2238	3004	1564	3058	1702	3182	1480	2967	1594	2906	3032	3727	3091	3000	3085	3054	3054	3011	1418	5743	2975	3061	2876	1855	3005	2883	1467	2984	3053	3089	2971	5968	2904	1867	3064	2982	2998	3630	1686	2009	3055	2864	1553	3029	2889	3012
SH79	2931	2999	6983	2238	3004	1564	3058	1702	3182	1480	2967	1594	2906	3032	3727	3091	3000	3085	3054	3054	3011	1418	5743	2975	3061	2876	1855	3005	2883	1467	2984	3053	3089	2971	5968	2904	1867	3064	2982	2998	3630	1686	2009	3055	2864	1553	3029	2889	3012
BJ21	1467	1374	6885	2933	1379	3085	1159	3018	1302	3073	959	3002	1350	1176	2362	1696	1506	1168	1147	1147	1500	2977	5705	1440	1045	1879	2997	1500	2017	3048	1479	1175	1694	1353	5946	1328	2969	1671	1483	1673	3357	3110	3155	1209	1785	2979	1668	994	1135
SD26	1475	1384	6891	2934	1389	3092	1175	3019	1318	3078	973	3002	1351	1190	2372	1699	1514	1184	1163	1163	1508	2982	5713	1442	1059	1894	2998	1510	2024	3053	1491	1183	1697	1360	5954	1332	2972	1678	1489	1683	3353	3111	3156	1225	1794	2983	1680	1008	1147
SH77	2932	3000	6984	2239	3005	1565	3059	1703	3183	1481	2968	1595	2907	3033	3728	3092	3001	3086	3055	3055	3012	1419	5744	2976	3062	2877	1856	3006	2884	1468	2985	3054	3090	2972	5969	2905	1868	3065	2983	2999	3631	1687	2010	3056	2865	1554	3030	2890	3013
XD171	1461	1545	7001	2829	1550	3048	1574	3010	1684	3003	1395	2954	1281	1446	2703	1713	1372	1601	1562	1562	1393	2927	5678	1311	1417	1737	2951	1361	1925	2991	1372	1476	1711	1379	5975	1576	2963	1688	1281	1460	3373	3013	3125	1467	1705	2967	1511	1418	1386
HUN39	2991	3011	6893	2119	3016	1585	3110	1660	3240	45	3029	1582	2982	3048	3728	3169	3088	3083	3106	3106	3098	1367	5683	3049	3106	2982	1874	3090	2984	126	3066	3117	3167	3082	5919	2960	1960	3140	3113	3030	3627	1642	1770	3073	2975	1572	3130	2973	3051
HB3	2923	2994	6978	2234	2999	1568	3053	1709	3179	1477	2960	1593	2899	3031	3720	3084	2993	3080	3049	3049	3006	1422	5737	2972	3054	2875	1860	2998	2878	1462	2977	3044	3082	2962	5965	2899	1866	3059	2977	2993	3625	1681	2009	3052	2857	1553	3024	2884	3007
QH2	2917	2986	6967	2226	2991	1560	3045	1703	3169	1467	2954	1585	2891	3021	3714	3076	2987	3074	3041	3041	2998	1412	5727	2962	3048	2865	1852	2992	2868	1452	2971	3038	3074	2956	5955	2891	1856	3049	2969	2983	3619	1674	1999	3042	2849	1543	3016	2876	2999
QH7	2917	2986	6967	2226	2991	1560	3045	1703	3169	1467	2954	1585	2891	3021	3714	3076	2987	3074	3041	3041	2998	1412	5727	2962	3048	2865	1852	2992	2868	1452	2971	3038	3074	2956	5955	2891	1856	3049	2969	2983	3619	1674	1999	3042	2849	1543	3016	2876	2999
SAX22	2503	1919	6891	3513	1924	3705	2401	3716	2543	3691	2161	3683	2372	1868	102	2898	2510	2281	2401	2401	2523	3720	5096	2478	2287	2850	3748	2509	2835	3685	2512	2576	2894	2537	5725	1869	3731	2875	2449	2764	3791	3749	3766	1848	2741	3642	2677	2236	1782
GS72	2993	3013	6895	2121	3018	1587	3112	1662	3242	47	3031	1584	2984	3050	3730	3171	3090	3085	3108	3108	3100	1369	5685	3051	3108	2984	1876	3092	2986	128	3068	3119	3169	3084	5921	2962	1962	3142	3115	3032	3629	1644	1772	3075	2977	1574	3132	2975	3053
HB23	2993	3013	6893	2121	3018	1587	3112	1662	3242	47	3031	1584	2984	3050	3730	3171	3090	3085	3108	3108	3100	1369	5685	3051	3108	2984	1876	3092	2986	128	3068	3119	3169	3084	5919	2962	1962	3142	3115	3032	3629	1644	1772	3075	2977	1574	3132	2975	3053
GS58	2994	3014	6896	2122	3019	1588	3113	1663	3243	48	3032	1585	2985	3051	3731	3172	3091	3086	3109	3109	3101	1370	5684	3052	3109	2985	1877	3093	2987	129	3069	3120	3170	3085	5920	2963	1963	3143	3116	3033	3630	1645	1773	3076	2978	1575	3133	2976	3054
GS62	2994	3014	6896	2122	3019	1588	3113	1663	3243	48	3032	1585	2985	3051	3731	3172	3091	3086	3109	3109	3101	1370	5686	3052	3109	2985	1877	3093	2987	129	3069	3120	3170	3085	5922	2963	1963	3143	3116	3033	3630	1645	1773	3076	2978	1575	3133	2976	3054
GS78	2994	3014	6896	2122	3019	1588	3113	1663	3243	48	3032	1585	2985	3051	3731	3172	3091	3086	3109	3109	3101	1370	5684	3052	3109	2985	1877	3093	2987	129	3069	3120	3170	3085	5920	2963	1963	3143	3116	3033	3630	1645	1773	3076	2978	1575	3133	2976	3054
HB42	2925	2996	6980	2236	3001	1570	3055	1711	3181	1479	2962	1595	2901	3033	3722	3086	2995	3082	3051	3051	3008	1424	5739	2974	3056	2877	1862	3000	2880	1464	2979	3046	3084	2964	5967	2901	1868	3061	2979	2995	3627	1683	2011	3054	2859	1555	3026	2886	3009
HUN78	2929	2998	6981	2238	3003	1570	3057	1713	3181	1479	2964	1595	2903	3033	3726	3088	2999	3084	3053	3053	3010	1424	5739	2974	3060	2876	1861	3004	2880	1464	2983	3050	3086	2968	5967	2903	1868	3061	2981	2995	3629	1684	2011	3054	2861	1555	3028	2888	3011
JX39	2507	1925	6899	3519	1930	3715	2407	3725	2545	3701	2167	3693	2376	1870	104	2906	2516	2287	2407	2407	2531	3729	5106	2486	2293	2874	3757	2517	2859	3695	2524	2582	2902	2543	5735	1870	3739	2883	2454	2770	3805	3759	3774	1850	2763	3649	2685	2238	1784
GZ55	2931	2994	6988	2239	2999	1575	3056	1718	3180	1484	2965	1598	2903	3035	3722	3087	2995	3087	3052	3052	3006	1431	5744	2970	3059	2878	1863	3004	2881	1465	2983	3046	3083	2966	5974	2900	1869	3062	2983	2990	3628	1687	2010	3054	2858	1560	3028	2887	3009
SH51	1071	1027	6928	2830	1032	3029	1546	3086	1630	3068	1337	3043	1224	1367	2524	1677	54	1482	1534	1534	147	3078	5600	1221	1276	1845	2992	61	1868	3055	131	892	1673	977	5898	1455	3003	1655	1265	1082	3271	3124	3174	1384	1401	3007	357	1317	1279
AH1	2921	2988	6914	2401	2993	1942	3085	1981	3164	1869	2989	1851	2910	3007	3786	3150	3013	3037	3067	3067	3037	1878	5758	3002	3043	2957	86	3019	2962	1900	3018	3056	3146	2961	5972	2945	1544	3125	3031	2996	3572	2059	2272	3034	2893	1960	3108	2961	2999
FY257	2933	2997	6988	2241	3002	1577	3059	1720	3183	1486	2968	1600	2906	3038	3725	3089	2998	3090	3055	3055	3009	1433	5746	2973	3062	2880	1865	3007	2883	1467	2986	3049	3085	2969	5976	2903	1871	3064	2986	2992	3631	1689	2012	3057	2860	1562	3031	2890	3012
FY261	2933	2997	6988	2241	3002	1577	3059	1720	3183	1486	2968	1600	2906	3038	3725	3089	2998	3090	3055	3055	3009	1433	5746	2973	3062	2880	1865	3007	2883	1467	2986	3049	3085	2969	5976	2903	1871	3064	2986	2992	3631	1689	2012	3057	2860	1562	3031	2890	3012
FY267	2933	2997	6988	2241	3002	1577	3059	1720	3183	1486	2968	1600	2906	3038	3725	3089	2998	3090	3055	3055	3009	1433	5746	2973	3062	2880	1865	3007	2883	1467	2986	3049	3085	2969	5976	2903	1871	3064	2986	2992	3631	1689	2012	3057	2860	1562	3031	2890	3012
CQ72	1508	1360	6880	2888	1365	3056	104	3141	1038	3104	381	3046	1379	1125	2444	1757	1555	889	54	54	1554	3058	5653	1446	647	1776	3068	1550	1937	3086	1541	1362	1755	1541	5871	1301	3043	1732	1530	1296	3385	3145	3247	1138	1699	3043	1537	873	1036
CQ10	2923	2990	6916	2403	2995	1944	3087	1983	3166	1871	2991	1853	2912	3009	3788	3152	3015	3039	3069	3069	3039	1880	5760	3004	3045	2959	88	3021	2964	1902	3020	3058	3148	2963	5974	2947	1546	3127	3033	2998	3574	2061	2274	3036	2895	1962	3110	2963	3001
HUN26	2948	3024	6993	2278	3029	1605	3090	1740	3214	1488	2997	1613	2934	3050	3750	3103	3027	3095	3086	3086	3042	1457	5706	2999	3091	2904	1880	3037	2899	1487	3007	3070	3100	2994	5967	2927	1902	3080	3011	3011	3649	1723	2035	3085	2877	1590	3063	2923	3042
HUN103	2970	2975	6900	2111	2980	1577	3077	1698	3193	207	2994	1582	2959	3014	3716	3148	3054	3064	3073	3073	3059	1330	5691	3007	3055	2957	1888	3061	2958	179	3026	3088	3146	3057	5921	2940	1945	3121	3080	2991	3593	1627	1780	3039	2938	1563	3115	2950	3028
GS33	2921	2997	6978	2253	3002	1585	3059	1720	3183	1490	2968	1604	2908	3036	3725	3085	2998	3094	3055	3055	3009	1433	5736	2973	3062	2884	1865	3007	2885	1475	2986	3045	3081	2969	5962	2903	1879	3060	2984	2988	3632	1701	2016	3057	2858	1566	3031	2890	3012
GS34	2921	2997	6978	2253	3002	1585	3059	1720	3183	1490	2968	1604	2908	3036	3725	3085	2998	3094	3055	3055	3009	1433	5736	2973	3062	2884	1865	3007	2885	1475	2986	3045	3081	2969	5962	2903	1879	3060	2984	2988	3632	1701	2016	3057	2858	1566	3031	2890	3012
GS35	2921	2997	6978	2253	3002	1585	3059	1720	3183	1490	2968	1604	2908	3036	3725	3085	2998	3094	3055	3055	3009	1433	5736	2973	3062	2884	1865	3007	2885	1475	2986	3045	3081	2969	5962	2903	1879	3060	2984	2988	3632	1701	2016	3057	2858	1566	3031	2890	3012
AH28	2923	3000	6981	2255	3005	1591	3062	1726	3186	1492	2971	1606	2910	3038	3728	3087	3001	3096	3058	3058	3012	1439	5737	2976	3065	2886	1871	3010	2887	1477	2989	3047	3083	2971	5966	2906	1885	3062	2987	2990	3633	1703	2018	3060	2860	1568	3034	2893	3015
CQ15	2924	3001	6979	2256	3006	1592	3063	1727	3187	1493	2972	1607	2911	3039	3727	3088	3002	3097	3059	3059	3013	1440	5737	2977	3066	2885	1872	3011	2886	1478	2988	3046	3084	2972	5966	2907	1886	3063	2988	2991	3634	1704	2019	3061	2859	1569	3035	2894	3016
CQ17	2924	3001	6979	2256	3006	1592	3063	1727	3187	1493	2972	1607	2911	3039	3727	3088	3002	3097	3059	3059	3013	1440	5737	2977	3066	2885	1872	3011	2886	1478	2988	3046	3084	2972	5966	2907	1886	3063	2988	2991	3634	1704	2019	3061	2859	1569	3035	2894	3016
HUBS5	5739	5751	5938	5828	5756	5766	5704	5777	5742	5773	5687	5742	5763	5717	5506	5756	5736	5773	5704	5704	5757	5827	5336	5746	5703	5774	5872	5744	5775	5771	5739	5714	5753	5754	3422	5716	5758	5734	5744	5707	5872	5796	5956	5744	5751	5810	5780	5692	5712
SD10	2924	3000	6981	2256	3005	1588	3062	1723	3186	1493	2971	1607	2911	3039	3728	3088	3001	3097	3058	3058	3012	1436	5739	2976	3065	2887	1868	3010	2888	1478	2989	3048	3084	2972	5965	2906	1882	3063	2987	2991	3635	1704	2019	3060	2861	1569	3034	2893	3015
SH36	2976	2981	6903	2117	2986	1583	3083	1704	3199	213	3000	1588	2965	3020	3720	3154	3060	3070	3079	3079	3065	1336	5697	3013	3061	2962	1894	3067	2962	185	3030	3092	3152	3063	5927	2946	1951	3127	3086	2997	3599	1633	1786	3045	2942	1569	3121	2956	3034
SH43	2976	2981	6903	2117	2986	1583	3083	1704	3199	213	3000	1588	2965	3020	3720	3154	3060	3070	3079	3079	3065	1336	5697	3013	3061	2962	1894	3067	2962	185	3030	3092	3152	3063	5927	2946	1951	3127	3086	2997	3599	1633	1786	3045	2942	1569	3121	2956	3034
SH7	2976	2981	6903	2117	2986	1583	3083	1704	3199	213	3000	1588	2965	3020	3720	3154	3060	3070	3079	3079	3065	1336	5697	3013	3061	2962	1894	3067	2962	185	3030	3092	3152	3063	5927	2946	1951	3127	3086	2997	3599	1633	1786	3045	2942	1569	3121	2956	3034
AH9	1244	685	6880	2862	690	3069	1140	3112	1224	3072	886	3037	1262	311	1759	1768	1391	1067	1128	1128	1394	3071	5683	1341	962	1735	3026	1388	1943	3051	1383	1427	1766	1364	5957	529	2980	1745	1383	1620	3350	3175	3223	288	1638	3035	1546	891	232
JX38	2926	3002	6983	2258	3007	1590	3064	1725	3188	1495	2973	1609	2913	3041	3730	3090	3003	3099	3060	3060	3014	1438	5741	2978	3067	2889	1870	3012	2890	1480	2991	3050	3086	2974	5967	2908	1884	3065	2989	2993	3637	1706	2021	3062	2863	1571	3036	2895	3017
S57	1476	1381	6893	2942	1386	3097	1168	3025	1313	3085	966	3012	1361	1185	2366	1706	1515	1179	1156	1156	1511	2988	5713	1454	1054	1891	3008	1509	2027	3060	1488	1184	1704	1362	5954	1333	2980	1683	1494	1684	3366	3120	3165	1218	1795	2989	1679	1005	1146
NX28	1393	1438	6902	2754	1443	2974	1581	3009	1692	2999	1366	2924	317	1393	2566	1831	1300	1440	1567	1567	1303	2975	5648	1215	1414	1813	2911	1295	1962	2996	1287	1436	1829	471	5905	1500	2971	1812	1076	1181	3236	3018	3107	1428	1685	2910	1431	1319	1338
GS61	1590	1618	6920	2905	1623	3057	1488	3156	1692	3113	1447	3049	637	1519	2692	1880	1392	1625	1474	1474	1373	3060	5601	1332	1492	1932	3049	1389	2053	3089	1359	1557	1876	885	5899	1591	3096	1860	1227	1130	3314	3103	3220	1532	1787	3039	1387	1495	1454
GZ98	2981	2986	6911	2122	2991	1590	3090	1711	3206	220	3007	1593	2972	3025	3725	3159	3065	3077	3086	3086	3070	1343	5702	3018	3068	2969	1899	3074	2969	192	3037	3097	3157	3068	5934	2951	1956	3134	3093	3002	3606	1638	1791	3052	2947	1576	3128	2963	3039
SD1	1590	1618	6920	2905	1623	3057	1488	3156	1692	3113	1447	3049	637	1519	2692	1880	1392	1625	1474	1474	1373	3060	5601	1332	1492	1932	3049	1389	2053	3089	1359	1557	1876	885	5899	1591	3096	1860	1227	1130	3314	3103	3220	1532	1787	3039	1387	1495	1454
SAX6	1047	980	6926	2835	985	3002	1533	3079	1610	3055	1324	3030	1229	1356	2527	1669	127	1481	1521	1521	100	3051	5595	1212	1265	1846	2997	118	1874	3032	76	867	1665	974	5901	1446	3008	1647	1268	1053	3299	3117	3167	1371	1378	3000	310	1320	1270
LN62	2929	2995	6970	2225	3000	1573	3068	1712	3192	1398	2975	1582	2914	3032	3725	3095	3016	3061	3064	3064	3029	1425	5736	2977	3069	2900	1857	3025	2895	1395	2999	3045	3091	2973	5962	2903	1885	3072	2996	2982	3647	1689	1990	3059	2866	1546	3051	2901	3014
XD12	2500	1912	6885	3521	1917	3692	2402	3711	2541	3686	2166	3676	2381	1861	127	2911	2521	2294	2402	2402	2528	3710	5088	2461	2290	2849	3743	2534	2830	3675	2509	2591	2907	2526	5720	1869	3726	2888	2472	2779	3800	3745	3771	1839	2758	3630	2682	2251	1787
XD20	2500	1912	6885	3521	1917	3692	2402	3711	2541	3686	2166	3676	2381	1861	127	2911	2521	2294	2402	2402	2528	3710	5088	2461	2290	2849	3743	2534	2830	3675	2509	2591	2907	2526	5720	1869	3726	2888	2472	2779	3800	3745	3771	1839	2758	3630	2682	2251	1787
XD24	2500	1912	6885	3521	1917	3692	2402	3711	2541	3686	2166	3676	2381	1861	127	2911	2521	2294	2402	2402	2528	3710	5088	2461	2290	2849	3743	2534	2830	3675	2509	2591	2907	2526	5720	1869	3726	2888	2472	2779	3800	3745	3771	1839	2758	3630	2682	2251	1787
NMG48	1049	982	6928	2837	987	3004	1535	3081	1612	3057	1326	3032	1231	1358	2529	1671	129	1483	1523	1523	102	3053	5597	1214	1267	1848	2999	120	1876	3034	78	869	1667	976	5903	1448	3010	1649	1270	1055	3301	3119	3169	1373	1380	3002	312	1322	1272
S204	1664	1748	6927	2745	1753	2912	1810	3019	1941	3028	1638	2995	1745	1754	2807	1948	1845	1744	1796	1796	1882	2989	5684	1746	1716	1542	2987	1848	1648	3019	1847	1772	1946	1794	5884	1913	2965	1924	1831	1880	3304	3038	3035	1784	1537	2864	1881	1707	1730
CQ63	1519	1371	6879	2887	1376	3048	72	3148	1046	3103	391	3045	1390	1133	2439	1767	1563	897	98	98	1562	3057	5648	1455	655	1785	3077	1556	1946	3085	1549	1373	1765	1550	5872	1309	3036	1742	1539	1304	3383	3144	3254	1146	1710	3043	1545	881	1044
HUN72	2982	2989	6912	2125	2994	1595	3089	1718	3205	225	3008	1598	2973	3024	3726	3164	3066	3076	3085	3085	3071	1348	5702	3019	3069	2982	1902	3077	2982	197	3044	3100	3162	3071	5935	2952	1959	3137	3092	3003	3613	1643	1794	3051	2960	1579	3129	2960	3038
LN36	2991	3026	6992	2105	3031	1507	3047	1580	3152	1352	2968	1535	2939	3028	3741	3087	3079	3058	3043	3043	3071	72	5756	3002	3053	2925	1888	3085	2939	1341	3050	3059	3083	3033	5952	2940	1967	3062	2994	2988	3600	1627	1778	3057	2917	1378	3131	2955	3012
HUN84	1052	985	6931	2840	990	3007	1538	3084	1615	3060	1329	3035	1234	1361	2532	1674	132	1486	1526	1526	105	3056	5600	1217	1270	1851	3002	123	1879	3037	81	872	1670	979	5906	1451	3013	1652	1273	1058	3304	3122	3172	1376	1383	3005	315	1325	1275
YN34	2912	2987	6922	2170	2992	1695	3107	1583	3215	1571	3010	1653	2956	3035	3718	3088	3040	3059	3095	3095	3059	1590	5714	2998	3074	2871	2077	3041	2900	1579	3036	3033	3084	3004	5890	2926	2086	3063	3075	3006	3613	1647	435	3064	2853	1142	3103	2998	3034
YN39	2912	2987	6922	2170	2992	1695	3107	1583	3215	1571	3010	1653	2956	3035	3718	3088	3040	3059	3095	3095	3059	1590	5714	2998	3074	2871	2077	3041	2900	1579	3036	3033	3084	3004	5890	2926	2086	3063	3075	3006	3613	1647	435	3064	2853	1142	3103	2998	3034
S82	1053	986	6932	2841	991	3008	1539	3085	1616	3061	1330	3036	1235	1362	2533	1675	133	1487	1527	1527	106	3057	5600	1218	1271	1852	3003	124	1880	3038	82	873	1671	980	5907	1452	3014	1653	1274	1059	3305	3123	3173	1377	1384	3006	316	1326	1276
TJ	1257	688	6879	2874	693	3074	1155	3119	1243	3081	901	3040	1281	318	1772	1793	1398	1082	1143	1143	1413	3073	5697	1352	977	1722	3037	1405	1924	3061	1388	1446	1791	1391	5966	543	2991	1768	1406	1645	3345	3191	3230	293	1641	3041	1563	914	253
FY256	1370	1292	6901	2863	1297	3106	1085	3034	1279	3077	883	3001	1264	1080	2316	1622	1378	1051	1073	1073	1406	2997	5651	1367	983	1778	3025	1380	1961	3062	1387	1131	1618	1373	5953	1265	2997	1601	1380	1575	3334	3129	3141	1115	1676	2986	1578	884	1029
GZ34	1469	1557	7001	2849	1562	3066	1586	3026	1698	3019	1407	2968	1289	1454	2711	1719	1384	1612	1574	1574	1407	2943	5680	1324	1429	1737	2967	1375	1931	3007	1384	1490	1717	1391	5972	1584	2979	1696	1289	1467	3353	3031	3141	1475	1703	2981	1525	1434	1395
HUBJ12	5995	5980	5400	6048	5983	5889	5972	5993	6000	5974	5977	5987	6005	5986	5763	6071	5986	5961	5976	5976	6000	6069	5170	6047	6015	6019	6020	5997	5989	5969	5973	5946	6069	6008	5278	5970	6026	6053	6025	5984	6031	5992	5996	6021	5997	5971	5998	5979	5979
FY187	1489	1342	6864	2868	1347	3032	101	3117	1015	3082	362	3024	1359	1104	2426	1735	1535	868	89	89	1534	3034	5631	1426	626	1754	3048	1530	1915	3064	1521	1342	1733	1519	5851	1280	3023	1710	1510	1274	3365	3121	3225	1117	1679	3024	1517	852	1015
HB45	1262	1115	6874	2826	1120	2965	400	3044	993	3015	85	2959	1183	877	2195	1563	1353	630	386	386	1361	2975	5626	1244	445	1644	2984	1357	1800	2996	1324	1260	1561	1342	5871	1048	2944	1538	1326	1479	3268	3059	3154	890	1606	2953	1475	650	793
FY237	1484	1391	6901	2949	1396	3104	1176	3032	1321	3092	974	3019	1369	1195	2373	1715	1523	1187	1164	1164	1519	2995	5720	1462	1062	1898	3015	1517	2034	3067	1496	1192	1713	1370	5960	1343	2987	1692	1502	1692	3374	3127	3172	1228	1803	2996	1687	1013	1154
GS105	1483	1390	6903	2948	1395	3106	1178	3034	1323	3094	976	3016	1371	1195	2372	1715	1522	1189	1166	1166	1518	2997	5718	1461	1064	1899	3014	1519	2035	3069	1497	1191	1712	1369	5964	1342	2986	1694	1504	1691	3373	3127	3171	1230	1801	2998	1689	1015	1154
GS84	1483	1390	6903	2948	1395	3106	1178	3034	1323	3094	976	3016	1371	1195	2372	1715	1522	1189	1166	1166	1518	2997	5718	1461	1064	1899	3014	1519	2035	3069	1497	1191	1712	1369	5964	1342	2986	1694	1504	1691	3373	3127	3171	1230	1801	2998	1689	1015	1154
GS99	1483	1390	6903	2948	1395	3106	1178	3034	1323	3094	976	3016	1371	1195	2372	1715	1522	1189	1166	1166	1518	2997	5718	1461	1064	1899	3014	1519	2035	3069	1497	1191	1712	1369	5964	1342	2986	1694	1504	1691	3373	3127	3171	1230	1801	2998	1689	1015	1154
GZ18	2978	2977	6905	2115	2982	1577	3083	1702	3191	237	3000	1586	2967	3018	3721	3150	3056	3068	3079	3079	3063	1338	5695	3009	3057	2964	1890	3063	2962	209	3030	3082	3148	3061	5928	2944	1945	3123	3090	2993	3603	1633	1786	3043	2946	1571	3119	2958	3030
GS133	1431	1545	6997	2845	1550	3068	1594	3022	1722	3019	1413	2976	1283	1470	2729	1715	1354	1621	1582	1582	1377	2947	5683	1329	1435	1757	2975	1343	1939	3007	1355	1458	1713	1379	5974	1598	2986	1694	1285	1486	3379	3033	3147	1491	1733	2993	1495	1428	1400
SH63	2885	2970	6901	2147	2975	1672	3086	1552	3194	1540	2989	1624	2935	3016	3700	3069	3019	3038	3074	3074	3042	1563	5693	2981	3052	2850	2052	3020	2879	1550	3015	3016	3067	2987	5869	2906	2063	3042	3054	2989	3589	1614	404	3043	2836	1107	3082	2965	3013
XJ15	1501	1353	6875	2879	1358	3049	108	3129	1030	3095	375	3037	1372	1115	2435	1751	1546	881	96	96	1545	3047	5642	1437	639	1769	3059	1541	1930	3077	1534	1355	1749	1532	5868	1289	3036	1726	1523	1289	3378	3136	3238	1128	1694	3035	1528	863	1026
CQ77	1484	1277	6881	2925	1282	3096	956	3119	1170	3085	682	3088	1297	1120	2318	1665	1509	93	944	944	1520	3085	5620	1421	624	1713	3044	1504	1884	3096	1507	1389	1663	1466	5895	1346	3053	1640	1484	1656	3356	3171	3149	1147	1678	3045	1600	897	1032
GS191	2921	3003	6986	2251	3008	1601	3072	1718	3188	1460	2981	1608	2914	3026	3731	3087	2986	3071	3068	3068	3025	1435	5744	2985	3071	2880	1833	2995	2875	1455	3002	3047	3083	2983	5978	2907	1851	3062	3002	2988	3625	1691	1986	3061	2866	1576	3047	2895	3012
FY216	2922	3000	6967	2278	3005	1594	3069	1737	3193	1503	2978	1627	2920	3044	3721	3091	3001	3102	3065	3065	3012	1458	5731	2983	3072	2897	1880	3010	2894	1488	2989	3046	3087	2970	5951	2913	1904	3066	2992	2989	3643	1726	2041	3067	2859	1582	3034	2900	3022
YN13	867	362	6912	2822	367	2993	1317	3052	1409	3020	1061	3009	1171	670	1896	1833	967	1243	1305	1305	980	3048	5636	1266	1163	1758	2979	964	1886	2999	961	989	1829	1032	5941	821	2939	1812	1302	1293	3274	3136	3140	649	1216	2988	1124	1102	612
HUN129	2923	3001	6968	2279	3006	1595	3070	1738	3194	1504	2979	1628	2921	3045	3722	3092	3002	3103	3066	3066	3013	1459	5732	2984	3073	2898	1881	3011	2895	1489	2990	3047	3088	2971	5952	2914	1905	3067	2993	2990	3644	1727	2042	3068	2860	1583	3035	2901	3023
HUNS34	2923	3001	6968	2279	3006	1595	3070	1738	3194	1504	2979	1628	2921	3045	3722	3092	3002	3103	3066	3066	3013	1459	5732	2984	3073	2898	1881	3011	2895	1489	2990	3047	3088	2971	5952	2914	1905	3067	2993	2990	3644	1727	2042	3068	2860	1583	3035	2901	3023
SD2	2923	3001	6968	2279	3006	1595	3070	1738	3194	1504	2979	1628	2921	3045	3722	3092	3002	3103	3066	3066	3013	1459	5732	2984	3073	2898	1881	3011	2895	1489	2990	3047	3088	2971	5952	2914	1905	3067	2993	2990	3644	1727	2042	3068	2860	1583	3035	2901	3023
CQ20	2925	3002	6969	2281	3007	1597	3071	1740	3195	1506	2980	1630	2923	3047	3723	3094	3003	3105	3067	3067	3014	1461	5733	2985	3074	2900	1883	3012	2897	1491	2991	3049	3090	2973	5954	2915	1907	3069	2994	2992	3645	1729	2044	3069	2862	1585	3036	2902	3024
CQ4	2925	3002	6969	2281	3007	1597	3071	1740	3195	1506	2980	1630	2923	3047	3723	3094	3003	3105	3067	3067	3014	1461	5733	2985	3074	2900	1883	3012	2897	1491	2991	3049	3090	2973	5954	2915	1907	3069	2994	2992	3645	1729	2044	3069	2862	1585	3036	2902	3024
CQ9	2925	3002	6969	2281	3007	1597	3071	1740	3195	1506	2980	1630	2923	3047	3723	3094	3003	3105	3067	3067	3014	1461	5733	2985	3074	2900	1883	3012	2897	1491	2991	3049	3090	2973	5954	2915	1907	3069	2994	2992	3645	1729	2044	3069	2862	1585	3036	2902	3024
SX52	2889	2974	6909	2151	2979	1680	3094	1560	3202	1548	2997	1628	2943	3022	3704	3075	3023	3046	3082	3082	3046	1571	5699	2985	3060	2858	2056	3028	2887	1558	3023	3020	3071	2991	5877	2911	2067	3050	3060	2993	3598	1620	408	3051	2840	1115	3090	2973	3019
JX21	2924	3002	6971	2282	3007	1598	3071	1741	3195	1507	2980	1629	2922	3046	3723	3095	3003	3104	3067	3067	3014	1462	5733	2985	3074	2899	1884	3012	2896	1492	2991	3048	3091	2972	5953	2915	1908	3070	2994	2991	3645	1730	2045	3069	2861	1586	3036	2902	3024
S103	2926	3003	6970	2282	3008	1598	3072	1741	3196	1507	2981	1631	2924	3048	3724	3095	3004	3106	3068	3068	3015	1462	5734	2986	3075	2901	1884	3013	2898	1492	2992	3050	3091	2974	5955	2916	1908	3070	2995	2993	3646	1730	2045	3070	2863	1586	3037	2903	3025
SD16	2890	2975	6910	2152	2980	1681	3095	1561	3203	1549	2998	1629	2944	3023	3705	3076	3024	3047	3083	3083	3047	1572	5700	2986	3061	2859	2057	3029	2888	1559	3024	3021	3072	2992	5878	2912	2068	3051	3061	2994	3599	1621	409	3052	2841	1116	3091	2974	3020
XD25	2925	2996	6985	2261	3001	1604	3072	1727	3188	1467	2981	1613	2914	3019	3726	3087	2983	3071	3068	3068	3025	1445	5746	2979	3071	2875	1838	2995	2870	1463	3006	3047	3083	2983	5977	2908	1854	3062	3002	2988	3625	1698	1993	3054	2866	1586	3047	2897	3014
XD26	2925	2996	6985	2261	3001	1604	3072	1727	3188	1467	2981	1613	2914	3019	3726	3087	2983	3071	3068	3068	3025	1445	5746	2979	3071	2875	1838	2995	2870	1463	3006	3047	3083	2983	5977	2908	1854	3062	3002	2988	3625	1698	1993	3054	2866	1586	3047	2897	3014
XD97	2926	3003	6970	2282	3008	1598	3072	1741	3196	1507	2981	1631	2924	3048	3724	3095	3004	3106	3068	3068	3015	1462	5734	2986	3075	2901	1884	3013	2898	1492	2992	3050	3091	2974	5955	2916	1908	3070	2995	2993	3646	1730	2045	3070	2863	1586	3037	2903	3025
BJ25	5990	5983	5404	6044	5986	5902	5973	6000	6001	5974	5978	5992	6002	5989	5786	6072	5989	5962	5977	5977	6001	6073	5194	6045	6016	6020	6023	5998	5990	5970	5977	5947	6070	6005	5297	5979	6037	6052	6021	5981	6036	5999	6003	6024	5996	5975	5999	5980	5980
QH1	2927	3005	6972	2283	3010	1599	3074	1742	3198	1508	2983	1632	2925	3049	3726	3096	3006	3107	3070	3070	3017	1463	5736	2988	3077	2902	1885	3015	2899	1493	2994	3051	3092	2975	5956	2918	1909	3071	2997	2994	3648	1731	2046	3072	2864	1587	3039	2905	3027
QH17	2927	3005	6972	2283	3010	1599	3074	1742	3198	1508	2983	1632	2925	3049	3726	3096	3006	3107	3070	3070	3017	1463	5736	2988	3077	2902	1885	3015	2899	1493	2994	3051	3092	2975	5956	2918	1909	3071	2997	2994	3648	1731	2046	3072	2864	1587	3039	2905	3027
HB50	1212	560	6868	2867	565	3048	1114	3057	1242	3039	858	3010	1226	147	1808	1756	1342	1046	1102	1102	1359	3047	5638	1327	955	1726	3011	1353	1885	3019	1342	1426	1754	1389	5938	378	2965	1735	1352	1602	3293	3161	3178	128	1633	2995	1511	869	238
HUN92	2928	3005	6972	2284	3010	1600	3074	1743	3198	1509	2983	1633	2926	3050	3726	3097	3006	3108	3070	3070	3017	1464	5736	2988	3077	2903	1886	3015	2900	1494	2994	3052	3093	2976	5957	2918	1910	3072	2997	2995	3648	1732	2047	3072	2865	1588	3039	2905	3027
HB61	1508	1339	6865	2879	1344	3051	122	3128	1034	3093	381	3041	1376	1101	2422	1752	1552	887	110	110	1551	3049	5640	1445	645	1769	3063	1547	1932	3075	1538	1361	1750	1536	5858	1297	3040	1727	1525	1291	3379	3135	3240	1114	1698	3039	1534	871	1012
S180	2929	3007	6974	2285	3012	1601	3076	1744	3200	1510	2985	1634	2927	3051	3728	3098	3008	3109	3072	3072	3019	1465	5738	2990	3079	2904	1887	3017	2901	1495	2996	3053	3094	2977	5958	2920	1911	3073	2999	2996	3650	1733	2048	3074	2866	1589	3041	2907	3029
FY213	2930	3008	6975	2286	3013	1602	3077	1745	3201	1511	2986	1635	2928	3052	3729	3099	3009	3110	3073	3073	3020	1466	5739	2991	3080	2905	1888	3018	2902	1496	2997	3054	3095	2978	5959	2921	1912	3074	3000	2997	3651	1734	2049	3075	2867	1590	3042	2908	3030
GS138	2893	2978	6908	2155	2983	1680	3094	1560	3202	1548	2997	1632	2943	3024	3709	3077	3027	3046	3082	3082	3050	1571	5701	2989	3061	2858	2060	3028	2886	1558	3023	3024	3075	2995	5877	2914	2071	3050	3060	2997	3599	1624	412	3051	2844	1115	3090	2973	3021
HB38	2892	2977	6909	2154	2982	1680	3094	1560	3202	1548	2997	1631	2943	3024	3708	3075	3026	3046	3082	3082	3049	1571	5701	2988	3061	2858	2059	3028	2887	1558	3023	3023	3072	2994	5877	2913	2070	3050	3060	2996	3597	1624	411	3051	2843	1115	3090	2973	3021
NMG7	2753	2866	6986	110	2871	2211	2869	2118	3053	2099	2809	2219	2717	2864	3524	2932	2833	2900	2865	2865	2853	2106	5745	2864	2906	2658	2358	2838	2739	2088	2834	2898	2930	2811	5990	2801	2633	2907	2840	2768	3566	2118	2324	2887	2740	2181	2903	2751	2815
XD34	2931	3008	6975	2285	3013	1603	3077	1746	3201	1512	2986	1636	2929	3053	3729	3100	3009	3111	3073	3073	3020	1467	5739	2991	3080	2906	1889	3018	2903	1497	2997	3053	3096	2979	5960	2921	1913	3075	3000	2998	3651	1735	2050	3075	2868	1591	3042	2908	3030
XD39	2931	3008	6975	2285	3013	1603	3077	1746	3201	1512	2986	1636	2929	3053	3729	3100	3009	3111	3073	3073	3020	1467	5739	2991	3080	2906	1889	3018	2903	1497	2997	3053	3096	2979	5960	2921	1913	3075	3000	2998	3651	1735	2050	3075	2868	1591	3042	2908	3030
XD40	2931	3008	6975	2285	3013	1603	3077	1746	3201	1512	2986	1636	2929	3053	3729	3100	3009	3111	3073	3073	3020	1467	5739	2991	3080	2906	1889	3018	2903	1497	2997	3053	3096	2979	5960	2921	1913	3075	3000	2998	3651	1735	2050	3075	2868	1591	3042	2908	3030
HUN108	2932	3009	6976	2286	3014	1604	3078	1747	3202	1513	2987	1637	2930	3054	3730	3101	3010	3112	3074	3074	3021	1468	5740	2992	3081	2907	1890	3019	2904	1498	2998	3054	3097	2980	5961	2922	1914	3076	3001	2999	3652	1736	2051	3076	2869	1592	3043	2909	3031
HUN71	2932	3009	6976	2286	3014	1604	3078	1747	3202	1513	2987	1637	2930	3054	3730	3101	3010	3112	3074	3074	3021	1468	5740	2992	3081	2907	1890	3019	2904	1498	2998	3054	3097	2980	5961	2922	1914	3076	3001	2999	3652	1736	2051	3076	2869	1592	3043	2909	3031
S67	1284	1137	6884	2832	1142	2971	424	3050	1017	3021	109	2967	1191	899	2201	1575	1375	654	410	410	1383	2981	5632	1254	469	1652	2991	1381	1814	3002	1348	1282	1573	1364	5883	1054	2951	1552	1350	1497	3278	3066	3158	914	1628	2961	1499	674	813
FY249	1499	1579	7024	2845	1584	3083	1631	3033	1739	3026	1452	2984	1322	1437	2711	1750	1414	1658	1619	1619	1439	2956	5691	1343	1474	1772	2975	1410	1965	3016	1423	1520	1747	1417	6000	1561	2994	1729	1324	1502	3385	3042	3147	1460	1755	2998	1560	1459	1435
FY252	1499	1579	7024	2845	1584	3083	1631	3033	1739	3026	1452	2984	1322	1437	2711	1750	1414	1658	1619	1619	1439	2956	5691	1343	1474	1772	2975	1410	1965	3016	1423	1520	1747	1417	6000	1561	2994	1729	1324	1502	3385	3042	3147	1460	1755	2998	1560	1459	1435
HUN23	1264	662	6869	2877	667	3047	1170	3098	1220	3046	914	3027	1274	345	1739	1776	1379	1063	1158	1158	1402	3066	5674	1353	992	1737	3008	1388	1925	3048	1381	1433	1774	1382	5965	562	2962	1755	1383	1632	3336	3171	3223	322	1618	3038	1554	905	258
GZ12	2757	2872	6987	115	2877	2215	2873	2123	3058	2102	2813	2226	2720	2870	3530	2938	2837	2905	2869	2869	2857	2109	5748	2870	2910	2663	2363	2840	2742	2091	2836	2905	2936	2816	5994	2807	2635	2911	2842	2772	3568	2123	2330	2891	2747	2183	2906	2755	2821
FY66	1284	1136	6900	2848	1141	2989	412	3066	1005	3042	119	2983	1195	898	2220	1575	1376	642	398	398	1375	2997	5659	1267	461	1672	3008	1371	1829	3021	1362	1274	1573	1355	5893	1074	2970	1550	1336	1491	3299	3081	3178	911	1626	2975	1489	664	809
HUN8	1361	1283	6890	2848	1288	3087	1073	3017	1265	3056	871	2986	1249	1069	2307	1611	1367	1039	1061	1061	1397	2976	5641	1358	971	1765	3010	1367	1948	3043	1374	1121	1609	1362	5939	1255	2982	1588	1367	1564	3324	3112	3126	1102	1665	2967	1565	872	1018
S49	1284	1136	6900	2848	1141	2989	412	3066	1005	3042	119	2983	1195	898	2220	1575	1376	642	398	398	1375	2997	5659	1267	461	1672	3008	1371	1829	3021	1362	1274	1573	1355	5893	1074	2970	1550	1336	1491	3299	3081	3178	911	1626	2975	1489	664	809
GZ43	1215	653	6875	2843	658	3036	1107	3077	1181	3048	853	3002	1229	278	1775	1753	1363	1032	1095	1095	1364	3035	5672	1318	925	1736	2993	1358	1920	3027	1353	1389	1751	1346	5953	496	2947	1728	1358	1585	3323	3149	3195	253	1614	2999	1514	864	199
HB28	3000	3017	6894	2131	3022	1620	3100	1735	3242	264	3017	1627	2974	3037	3694	3175	3074	3085	3096	3096	3072	1374	5675	3033	3096	2992	1939	3076	2997	223	3038	3133	3173	3080	5913	2973	1990	3148	3096	3022	3625	1665	1813	3080	2975	1607	3128	2963	3055
GS208	5801	5813	5935	5865	5818	5806	5783	5821	5826	5827	5766	5789	5799	5820	5563	5833	5800	5814	5783	5783	5823	5873	5335	5802	5794	5849	5916	5806	5852	5823	5801	5776	5830	5818	3360	5799	5809	5811	5802	5759	5892	5836	5990	5847	5813	5846	5842	5795	5815
HB84	1480	1554	6990	2840	1559	3047	1615	3023	1726	3020	1436	2977	1304	1459	2724	1722	1399	1642	1603	1603	1422	2948	5680	1333	1458	1754	2970	1390	1944	3008	1401	1505	1720	1402	5964	1586	2983	1699	1304	1486	3376	3034	3146	1480	1742	2990	1540	1441	1425
XJ12	3000	3017	6894	2133	3022	1622	3100	1737	3242	266	3017	1629	2974	3037	3694	3177	3074	3085	3096	3096	3072	1376	5675	3033	3096	2992	1941	3076	2997	225	3038	3133	3175	3078	5913	2973	1992	3150	3096	3022	3627	1667	1813	3080	2975	1607	3128	2963	3055
XJ13	3000	3017	6894	2133	3022	1622	3100	1737	3242	266	3017	1629	2974	3037	3694	3177	3074	3085	3096	3096	3072	1376	5675	3033	3096	2992	1941	3076	2997	225	3038	3133	3175	3078	5913	2973	1992	3150	3096	3022	3627	1667	1813	3080	2975	1607	3128	2963	3055
XJ9	3000	3017	6894	2133	3022	1622	3100	1737	3242	266	3017	1629	2974	3037	3694	3177	3074	3085	3096	3096	3072	1376	5675	3033	3096	2992	1941	3076	2997	225	3038	3133	3175	3078	5913	2973	1992	3150	3096	3022	3627	1667	1813	3080	2975	1607	3128	2963	3055
GS128	1356	1276	6885	2849	1281	3083	1065	3016	1259	3056	865	2987	1246	1064	2302	1604	1366	1033	1053	1053	1392	2978	5636	1355	967	1760	3010	1362	1943	3043	1367	1115	1602	1359	5935	1252	2980	1581	1362	1557	3323	3111	3127	1097	1660	2967	1560	870	1017
XJ4	3001	3018	6895	2134	3023	1623	3101	1738	3243	267	3018	1630	2975	3038	3695	3178	3075	3086	3097	3097	3073	1377	5676	3034	3097	2993	1942	3077	2998	226	3039	3134	3176	3079	5914	2974	1993	3151	3097	3023	3628	1668	1814	3081	2976	1608	3129	2964	3056
FY253	1395	1302	6886	2895	1307	3059	1111	3005	1243	3045	909	2978	1326	1096	2356	1649	1436	1127	1099	1099	1438	2954	5704	1399	993	1829	2998	1432	1973	3020	1417	1101	1647	1327	5951	1284	2968	1628	1443	1609	3344	3104	3127	1133	1719	2956	1607	956	1065
FY268	1395	1302	6886	2895	1307	3059	1111	3005	1243	3045	909	2978	1326	1096	2356	1649	1436	1127	1099	1099	1438	2954	5704	1399	993	1829	2998	1432	1973	3020	1417	1101	1647	1327	5951	1284	2968	1628	1443	1609	3344	3104	3127	1133	1719	2956	1607	956	1065
HB13	2785	2862	6981	261	2867	2162	2904	2077	3043	2066	2844	2176	2792	2899	3595	2961	2864	2949	2900	2900	2896	2079	5744	2927	2939	2737	2309	2867	2785	2041	2875	2959	2959	2876	5982	2836	2566	2934	2879	2815	3574	2097	2331	2922	2787	2152	2944	2826	2854
HUN113	1442	1329	6888	2901	1334	3081	1142	3017	1271	3069	942	2994	1345	1127	2357	1672	1473	1151	1130	1130	1467	2974	5701	1396	1030	1861	3010	1467	2003	3044	1446	1140	1670	1310	5951	1318	2978	1647	1460	1622	3362	3112	3151	1160	1731	2977	1635	979	1102
NMG29	2972	3039	6993	2084	3044	1520	3017	1567	3168	1337	2939	1528	2908	2977	3728	3100	3060	3053	3013	3013	3074	147	5757	2995	3014	2894	1871	3062	2950	1330	3049	3042	3098	3008	5943	2890	1956	3073	2995	2982	3600	1632	1745	3004	2916	1379	3132	2918	2983
HB64	1883	1846	6957	2722	1851	2919	1817	2958	1989	3020	1726	2960	1832	1748	2925	1745	1921	1765	1805	1805	1954	3008	5694	1779	1747	435	3019	1926	868	3025	1921	1933	1743	1901	5922	1917	2878	1720	1874	1896	3387	2985	3052	1801	1595	2964	1786	1789	1756
FY45	1519	1410	6908	2940	1415	3104	1201	3036	1330	3090	1001	3013	1386	1214	2381	1731	1554	1212	1189	1189	1548	2993	5723	1445	1091	1930	3017	1552	2064	3065	1531	1221	1727	1391	5970	1362	2985	1708	1519	1701	3388	3121	3182	1249	1802	2998	1720	1038	1189
SH44	1514	1600	6999	2825	1605	3063	1546	3020	1685	3014	1458	2958	1336	1501	2753	1774	1443	1658	1534	1534	1464	2939	5662	1363	1440	1740	2961	1432	1936	3002	1445	1484	1772	1434	5966	1629	2983	1751	1348	1432	3387	3015	3136	1522	1712	2983	1512	1463	1439
SH40	1517	1603	7002	2828	1608	3066	1549	3023	1688	3017	1461	2961	1339	1504	2756	1777	1446	1661	1537	1537	1467	2942	5665	1366	1443	1743	2964	1435	1937	3005	1448	1487	1775	1437	5969	1632	2986	1754	1351	1435	3390	3018	3139	1525	1715	2986	1515	1466	1442
XD23	1339	1374	6898	2706	1379	2949	1491	3011	1655	2985	1278	2918	183	1355	2506	1757	1206	1392	1477	1477	1227	2963	5594	1143	1356	1751	2910	1199	1916	2972	1211	1394	1755	555	5886	1434	2953	1734	971	1105	3184	3002	3093	1360	1634	2894	1353	1217	1272
NMG32	1180	636	6906	2886	641	3054	1200	3061	1320	3065	946	3040	1320	215	1937	1784	1360	1146	1188	1188	1375	3057	5659	1355	1031	1746	3039	1369	1943	3045	1356	1486	1782	1396	5975	370	2971	1759	1383	1594	3312	3159	3208	192	1663	3015	1525	951	308
S104	5535	5533	6814	5603	5538	5501	5555	5542	5573	5535	5554	5551	5567	5531	5013	5548	5534	5506	5555	5555	5554	5611	2666	5539	5596	5523	5617	5538	5521	5544	5524	5526	5546	5568	5229	5506	5621	5524	5554	5526	5636	5541	5625	5556	5533	5535	5529	5548	5542
S205	2906	2975	6907	2162	2980	1677	3085	1559	3193	1577	2990	1667	2938	3043	3700	3082	3024	3076	3073	3073	3047	1585	5701	2976	3052	2858	2080	3027	2899	1581	3022	3033	3080	2998	5875	2903	2089	3057	3057	3000	3587	1633	468	3044	2857	1127	3087	2966	3012
S194	1180	1121	6969	2912	1126	3053	1622	3124	1707	3104	1411	3077	1310	1475	2579	1760	250	1578	1608	1608	227	3096	5639	1299	1360	1935	3036	237	1969	3081	207	1008	1758	1097	5940	1512	3049	1736	1357	1182	3350	3152	3234	1488	1511	3047	433	1417	1389
TJ1	1368	1267	6874	2856	1272	3051	1008	2993	1149	3041	808	2966	1270	1029	2344	1694	1400	1045	996	996	1393	2960	5704	1364	924	1791	2978	1393	1955	3016	1372	1068	1692	1249	5933	1239	2958	1669	1402	1568	3375	3082	3117	1062	1685	2951	1561	847	976
TJ10	1368	1267	6874	2856	1272	3051	1008	2993	1149	3041	808	2966	1270	1029	2344	1694	1400	1045	996	996	1393	2960	5704	1364	924	1791	2978	1393	1955	3016	1372	1068	1692	1249	5933	1239	2958	1669	1402	1568	3375	3082	3117	1062	1685	2951	1561	847	976
TJ12	1368	1267	6874	2856	1272	3051	1008	2993	1149	3041	808	2966	1270	1029	2344	1694	1400	1045	996	996	1393	2960	5704	1364	924	1791	2978	1393	1955	3016	1372	1068	1692	1249	5933	1239	2958	1669	1402	1568	3375	3082	3117	1062	1685	2951	1561	847	976
TJ15	1368	1267	6874	2856	1272	3051	1008	2993	1149	3041	808	2966	1270	1029	2344	1694	1400	1045	996	996	1393	2960	5704	1364	924	1791	2978	1393	1955	3016	1372	1068	1692	1249	5933	1239	2958	1669	1402	1568	3375	3082	3117	1062	1685	2951	1561	847	976
TJ17	1368	1267	6874	2856	1272	3051	1008	2993	1149	3041	808	2966	1270	1029	2344	1694	1400	1045	996	996	1393	2960	5704	1364	924	1791	2978	1393	1955	3016	1372	1068	1692	1249	5933	1239	2958	1669	1402	1568	3375	3082	3117	1062	1685	2951	1561	847	976
TJ3	1368	1267	6874	2856	1272	3051	1008	2993	1149	3041	808	2966	1270	1029	2344	1694	1400	1045	996	996	1393	2960	5704	1364	924	1791	2978	1393	1955	3016	1372	1068	1692	1249	5933	1239	2958	1669	1402	1568	3375	3082	3117	1062	1685	2951	1561	847	976
TJ8	1368	1267	6874	2856	1272	3051	1008	2993	1149	3041	808	2966	1270	1029	2344	1694	1400	1045	996	996	1393	2960	5704	1364	924	1791	2978	1393	1955	3016	1372	1068	1692	1249	5933	1239	2958	1669	1402	1568	3375	3082	3117	1062	1685	2951	1561	847	976
TJ5	1369	1268	6875	2857	1273	3052	1009	2994	1150	3042	809	2967	1271	1030	2345	1695	1401	1046	997	997	1394	2961	5705	1365	925	1792	2979	1394	1956	3017	1373	1069	1693	1250	5934	1240	2959	1670	1403	1569	3376	3083	3118	1063	1686	2952	1562	848	977
SH52	5862	5876	5782	5923	5881	5861	5866	5883	5890	5883	5849	5856	5877	5895	5728	5889	5859	5838	5866	5866	5880	5946	5363	5877	5879	5913	5973	5868	5916	5879	5863	5837	5885	5877	3508	5894	5863	5867	5886	5825	5963	5902	5795	5922	5874	5895	5904	5864	5890
SH56	5862	5876	5782	5923	5881	5861	5866	5883	5890	5883	5849	5856	5877	5895	5728	5889	5859	5838	5866	5866	5880	5946	5363	5877	5879	5913	5973	5868	5916	5879	5863	5837	5885	5877	3508	5894	5863	5867	5886	5825	5963	5902	5795	5922	5874	5895	5904	5864	5890
JX40	2933	2966	6938	2227	2971	1801	3044	1698	3144	1703	2949	1784	2911	3022	3662	3075	3021	3044	3032	3032	3034	1686	5721	2963	3011	2908	2160	3014	2949	1701	3015	3028	3073	2991	5904	2922	2146	3050	3020	2993	3605	1745	634	3017	2890	1270	3074	2941	2984
S195	1204	1056	6902	2844	1061	2985	498	3070	979	3045	205	2997	1179	920	2220	1621	1296	655	484	484	1295	3004	5658	1225	541	1708	2998	1293	1865	3024	1284	1194	1619	1276	5902	1096	2966	1598	1320	1442	3299	3087	3181	935	1546	2978	1411	678	831
S182	1581	1464	6904	3049	1469	3171	1203	3128	1361	3156	1099	3114	1472	1276	2519	1791	1597	1244	1191	1191	1615	3104	5720	1539	1144	1920	3116	1599	2066	3144	1589	1244	1789	1511	5972	1462	3083	1770	1559	1720	3409	3243	3267	1309	1833	3098	1719	1130	1237
S200	1581	1464	6904	3049	1469	3171	1203	3128	1361	3156	1099	3114	1472	1276	2519	1791	1597	1244	1191	1191	1615	3104	5720	1539	1144	1920	3116	1599	2066	3144	1589	1244	1789	1511	5972	1462	3083	1770	1559	1720	3409	3243	3267	1309	1833	3098	1719	1130	1237
S210	1581	1464	6904	3049	1469	3171	1203	3128	1361	3156	1099	3114	1472	1276	2519	1791	1597	1244	1191	1191	1615	3104	5720	1539	1144	1920	3116	1599	2066	3144	1589	1244	1789	1511	5972	1462	3083	1770	1559	1720	3409	3243	3267	1309	1833	3098	1719	1130	1237
HB55	2926	3011	6914	2191	3016	1743	3110	1630	3210	1628	3034	1707	2977	3059	3741	3114	3064	3086	3098	3098	3087	1652	5679	3023	3093	2881	2135	3069	2894	1637	3064	3032	3110	3025	5894	2948	2148	3089	3095	3011	3632	1683	518	3088	2852	1202	3114	3020	3056
HUBJ22	1844	1874	6952	2731	1879	2894	1908	2900	2039	2954	1772	2962	1890	1895	2903	1859	1826	1877	1896	1896	1866	2956	5677	1834	1875	822	2963	1833	212	2957	1833	1966	1857	1882	5909	1988	2873	1836	1923	1912	3260	2956	3063	1952	1648	2911	1784	1939	1893
S203	1508	1403	6911	2951	1408	3114	1246	3043	1397	3109	1044	3036	1367	1207	2384	1698	1539	1257	1234	1234	1535	3016	5721	1468	1134	1919	3032	1535	2053	3084	1514	1272	1696	1366	5950	1355	3002	1677	1510	1686	3398	3151	3181	1242	1823	3001	1705	1091	1166
GS85	1533	1399	6916	2997	1404	3116	1253	3036	1396	3082	1049	3047	1438	1201	2427	1782	1566	1218	1243	1243	1564	3029	5756	1525	1095	1926	3031	1564	2050	3055	1543	1243	1780	1415	5997	1361	2993	1761	1577	1745	3357	3169	3166	1236	1866	3004	1732	1080	1193
HUNS32	1391	763	6873	2878	768	3070	1197	3113	1220	3093	943	3030	1277	468	1806	1759	1394	1062	1185	1185	1405	3081	5683	1372	1001	1754	3047	1405	1944	3071	1384	1442	1755	1381	5963	692	3015	1736	1412	1643	3356	3175	3250	445	1641	3055	1559	918	397
HUN128	1741	1831	6928	2764	1836	2943	1857	3042	1982	3039	1687	3012	1794	1791	2855	1942	1906	1801	1845	1845	1965	3034	5721	1817	1767	1645	3020	1909	1747	3026	1932	1853	1940	1875	5909	1950	3018	1920	1902	1955	3318	3057	3050	1825	1620	2903	1966	1744	1771
HUN75	1741	1831	6928	2764	1836	2943	1857	3042	1982	3039	1687	3012	1794	1791	2855	1942	1906	1801	1845	1845	1965	3034	5721	1817	1767	1645	3020	1909	1747	3026	1932	1853	1940	1875	5909	1950	3018	1920	1902	1955	3318	3057	3050	1825	1620	2903	1966	1744	1771
GS123	1261	658	6892	2937	663	3068	1112	3091	1282	3071	858	3042	1226	313	1886	1799	1398	1071	1100	1100	1403	3061	5662	1377	969	1827	3041	1395	1990	3050	1394	1480	1797	1453	5950	491	2985	1776	1370	1658	3342	3177	3233	292	1699	3023	1555	877	272
HUN15	1698	1848	6974	2651	1853	2925	1751	2996	2082	3006	1812	2988	1836	1881	2955	2036	1847	1950	1737	1737	1868	2995	5727	1814	1862	1610	2952	1840	1738	2996	1845	1902	2034	1814	5971	1911	3009	2015	1814	1662	3328	3033	3085	1928	1617	2953	1859	1889	1862
GD40	5576	5568	6803	5655	5573	5524	5614	5585	5620	5546	5613	5594	5612	5590	4993	5575	5571	5573	5614	5614	5569	5634	2727	5576	5659	5562	5648	5577	5564	5547	5541	5569	5573	5603	5221	5565	5658	5553	5603	5559	5679	5576	5643	5617	5578	5588	5546	5605	5589
GS207	5935	5900	5954	5989	5905	5916	5940	5925	5928	5916	5914	5911	5967	5941	5828	5974	5950	6008	5940	5940	5981	6028	5351	5961	5983	5961	5985	5957	5963	5920	5960	5903	5970	5950	3328	5918	5955	5952	5992	5919	6031	5986	6168	5968	5915	5974	5971	5946	5943
HUN7	1210	657	6877	2881	662	3063	1067	3084	1268	3058	811	3045	1227	342	1911	1769	1317	1049	1055	1055	1372	3045	5666	1372	970	1811	3022	1312	1928	3043	1359	1415	1767	1426	5944	518	2985	1746	1355	1619	3310	3155	3185	319	1668	3005	1522	846	285
CQ1	1216	1187	6959	2893	1192	3062	1543	3158	1504	3111	1429	3069	1304	1463	2673	1748	344	1554	1531	1531	321	3105	5576	1319	1338	1848	3071	337	1930	3090	299	957	1746	1121	5898	1568	3059	1724	1387	1119	3383	3172	3228	1476	1428	3076	371	1437	1378
CQ14	1216	1187	6959	2893	1192	3062	1543	3158	1504	3111	1429	3069	1304	1463	2673	1748	344	1554	1531	1531	321	3105	5576	1319	1338	1848	3071	337	1930	3090	299	957	1746	1121	5898	1568	3059	1724	1387	1119	3383	3172	3228	1476	1428	3076	371	1437	1378
CQ16	1216	1187	6959	2893	1192	3062	1543	3158	1504	3111	1429	3069	1304	1463	2673	1748	344	1554	1531	1531	321	3105	5576	1319	1338	1848	3071	337	1930	3090	299	957	1746	1121	5898	1568	3059	1724	1387	1119	3383	3172	3228	1476	1428	3076	371	1437	1378
GX37	1923	2030	6822	2845	2035	3081	2038	3031	2141	3049	1879	2999	1898	1981	3108	1760	1920	1933	2022	2022	1928	3015	5726	1975	1939	1756	3029	1916	1885	3046	1893	1992	1758	1803	5952	2022	3091	1735	2007	1908	3457	3102	2893	2010	2015	2970	1854	2022	1970
XJ5	1407	1416	6894	2782	1421	2987	1563	3034	1695	3009	1342	2950	421	1409	2586	1698	1237	1494	1549	1549	1252	2989	5573	1177	1436	1812	2927	1230	1930	2984	1234	1472	1696	744	5857	1489	2986	1677	1095	1198	3176	3030	3152	1416	1734	2936	1400	1302	1324
FY248	1830	1846	6950	2627	1851	2807	1799	2894	1967	2917	1721	2887	1833	1751	2902	1697	1828	1796	1787	1787	1861	2885	5688	1713	1703	553	2906	1833	993	2913	1830	1865	1695	1840	5904	1858	2837	1672	1801	1790	3323	2931	2956	1806	1632	2840	1883	1786	1759
HB53	1294	790	6890	2954	795	3136	1067	3128	1157	3136	813	3087	1307	445	2028	1801	1435	971	1053	1053	1440	3107	5716	1415	910	1799	3083	1430	2012	3115	1429	1349	1799	1416	5968	671	3035	1776	1422	1683	3367	3199	3237	428	1702	3068	1590	822	392
AH19	1294	790	6891	2955	795	3138	1074	3130	1161	3138	820	3087	1306	445	2029	1802	1432	978	1060	1060	1437	3109	5712	1412	917	1802	3083	1429	2015	3117	1428	1346	1800	1413	5966	671	3035	1779	1425	1680	3372	3199	3237	430	1703	3070	1589	827	392
LN13	2952	3023	6898	2137	3028	1638	3112	1534	3222	1544	3030	1630	2960	3059	3745	3089	3068	3084	3108	3108	3089	1567	5696	3012	3091	2886	2039	3069	2903	1558	3062	3059	3087	3038	5862	2955	2084	3062	3081	3024	3554	1589	572	3088	2893	1062	3134	2999	3062
LN59	2952	3023	6898	2137	3028	1638	3112	1534	3222	1544	3030	1630	2960	3059	3745	3089	3068	3084	3108	3108	3089	1567	5696	3012	3091	2886	2039	3069	2903	1558	3062	3059	3087	3038	5862	2955	2084	3062	3081	3024	3554	1589	572	3088	2893	1062	3134	2999	3062
FY215	5800	5823	5850	5887	5828	5744	5804	5818	5810	5818	5804	5812	5802	5850	5699	5773	5833	5664	5796	5796	5854	5871	5177	5829	5845	5825	5898	5838	5822	5827	5831	5790	5770	5837	1378	5817	5845	5751	5819	5789	5903	5791	5886	5875	5804	5789	5834	5823	5836
HB27	2960	3031	6906	2145	3036	1646	3121	1542	3231	1552	3039	1638	2968	3067	3753	3098	3076	3093	3117	3117	3097	1575	5704	3020	3100	2894	2047	3077	2911	1566	3070	3068	3096	3046	5870	2963	2092	3071	3089	3032	3562	1597	580	3096	2901	1070	3142	3008	3070
HB33	2960	3031	6906	2145	3036	1646	3121	1542	3231	1552	3039	1638	2968	3067	3753	3098	3076	3093	3117	3117	3097	1575	5704	3020	3100	2894	2047	3077	2911	1566	3070	3068	3096	3046	5870	2963	2092	3071	3089	3032	3562	1597	580	3096	2901	1070	3142	3008	3070
ZJ29	1438	1532	6993	2843	1537	3106	1558	3080	1690	3073	1379	3004	1246	1443	2702	1664	1165	1592	1546	1546	1188	3027	5660	1257	1408	1718	2972	1158	1912	3062	1168	1413	1662	1346	5938	1573	3046	1643	1256	1404	3314	3090	3175	1466	1746	3017	1308	1389	1374
LN64	2924	2990	6863	2153	2995	508	3033	1547	3113	1519	2949	1511	2906	3020	3731	3117	2994	3042	3034	3034	2990	1488	5634	2998	3038	2907	1890	2994	2873	1528	2958	2997	3115	2961	5870	2914	1976	3088	3009	2934	3569	1703	1846	3051	2885	1599	3034	2904	3018
S211	1829	1843	6952	2645	1848	2840	1793	2932	1961	2937	1715	2927	1861	1765	2898	1727	1846	1804	1781	1781	1879	2921	5716	1713	1697	595	2944	1849	1040	2933	1840	1865	1725	1870	5926	1854	2875	1700	1823	1810	3345	2970	2994	1800	1668	2876	1899	1780	1755
HB22	1863	1897	6959	2766	1902	2950	1977	2928	2114	3015	1841	2997	1930	1920	2948	1892	1842	1853	1965	1965	1883	3003	5678	1903	1914	951	3006	1850	373	3018	1854	1989	1890	1902	5920	1987	2894	1867	1930	1936	3269	3003	3097	1975	1681	2948	1801	1995	1918
HB4	1863	1897	6959	2766	1902	2950	1977	2928	2114	3015	1841	2997	1930	1920	2948	1892	1842	1853	1965	1965	1883	3003	5678	1903	1914	951	3006	1850	373	3018	1854	1989	1890	1902	5920	1987	2894	1867	1930	1936	3269	3003	3097	1975	1681	2948	1801	1995	1918
HB30	1864	1898	6960	2767	1903	2951	1978	2929	2115	3016	1842	2998	1931	1921	2949	1893	1843	1854	1966	1966	1884	3004	5679	1904	1915	952	3007	1851	374	3019	1855	1990	1891	1903	5921	1988	2895	1868	1931	1937	3270	3004	3098	1976	1682	2949	1802	1996	1919
CQ52	2902	2953	6875	2124	2958	515	3000	1538	3077	1507	2917	1497	2886	2983	3709	3088	2995	3012	2998	2998	2992	1494	5651	2973	3006	2908	1893	2996	2874	1522	2968	2965	3086	2945	5870	2874	1966	3061	2997	2918	3552	1690	1847	3012	2865	1555	3038	2874	2978
ZJ1	1842	1854	6967	2656	1859	2853	1806	2945	1974	2950	1728	2938	1874	1776	2909	1738	1857	1817	1794	1794	1890	2934	5727	1724	1710	610	2957	1862	1055	2946	1853	1876	1736	1881	5941	1865	2888	1713	1836	1821	3358	2981	3005	1813	1681	2889	1912	1793	1766
HUN115	1309	1143	6934	2854	1148	3026	1023	3089	1237	3059	802	3050	1192	1015	2296	1732	1360	1024	1011	1011	1371	3040	5696	1237	932	1812	3009	1355	2052	3044	1360	1231	1730	1391	5958	1196	2974	1709	1305	1517	3361	3127	3141	1030	1532	2994	1467	797	922
HB29	1262	762	6891	2914	767	3112	1282	3098	1398	3081	1028	3054	1328	472	2029	1848	1426	1216	1270	1270	1425	3070	5726	1427	1113	1862	3071	1423	2030	3060	1415	1476	1846	1375	5965	691	3030	1825	1425	1660	3382	3163	3202	452	1723	3038	1577	1043	444
HB37	1262	762	6891	2914	767	3112	1282	3098	1398	3081	1028	3054	1328	472	2029	1848	1426	1216	1270	1270	1425	3070	5726	1427	1113	1862	3071	1423	2030	3060	1415	1476	1846	1375	5965	691	3030	1825	1425	1660	3382	3163	3202	452	1723	3038	1577	1043	444
S147	1388	1446	6960	2856	1451	2999	1556	3100	1716	3069	1345	3005	524	1446	2618	1801	1290	1516	1544	1544	1269	3027	5671	1156	1423	1873	3006	1279	2009	3046	1251	1446	1799	737	5949	1529	3038	1777	1070	1199	3326	3096	3202	1465	1704	2972	1394	1338	1387
FY228	1490	1324	6906	2801	1329	2984	954	3106	1097	3071	871	3012	1295	1104	2474	1754	1447	1068	942	942	1470	3069	5658	1428	895	1774	3038	1444	2034	3057	1449	1232	1752	1494	5938	1319	3010	1731	1436	1512	3327	3126	3214	1119	1675	3017	1508	394	1033
GS59	1859	1893	6963	2772	1898	2962	1989	2936	2120	3029	1863	3003	1927	1916	2944	1904	1840	1875	1977	1977	1881	3015	5688	1915	1936	965	3004	1850	399	3032	1854	1985	1902	1898	5928	1983	2894	1881	1940	1947	3287	3009	3105	1973	1697	2960	1815	1992	1914
GS100	964	958	6921	2787	963	2971	1466	3031	1604	3016	1257	3010	1127	1304	2487	1646	410	1433	1452	1452	453	3017	5617	1162	1279	1769	2937	405	1853	3001	437	989	1642	888	5909	1392	2958	1626	1216	1122	3260	3083	3099	1319	1319	2942	662	1240	1218
AH91	2909	2979	6861	2061	2984	1675	3076	406	3151	1606	2979	1465	2938	3023	3675	3119	3058	3047	3064	3064	3073	1520	5599	3040	3056	2809	1892	3059	2780	1620	3046	3043	3117	2976	5831	2912	1908	3089	3018	2999	3604	1605	1717	3048	2857	1571	3100	2951	3010
NMG8	2878	2886	6880	2252	2891	1825	3031	1711	3143	1468	2916	1641	2869	2932	3731	3116	2991	3016	3017	3017	3001	1694	5682	2943	2978	2912	1582	2989	2915	1462	2974	3011	3114	2962	5906	2847	1579	3087	2999	2941	3586	1757	1948	2947	2892	1666	3078	2876	2920
NMG3	2879	2887	6881	2253	2892	1826	3032	1712	3144	1469	2917	1642	2870	2933	3732	3117	2992	3017	3018	3018	3002	1695	5683	2944	2979	2913	1583	2990	2916	1463	2975	3012	3115	2963	5907	2848	1580	3088	3000	2942	3587	1758	1949	2948	2893	1667	3079	2877	2921
NMG5	2879	2887	6881	2253	2892	1826	3032	1712	3144	1469	2917	1642	2870	2933	3732	3117	2992	3017	3018	3018	3002	1695	5683	2944	2979	2913	1583	2990	2916	1463	2975	3012	3115	2963	5907	2848	1580	3088	3000	2942	3587	1758	1949	2948	2893	1667	3079	2877	2921
NMG9	2879	2887	6881	2253	2892	1826	3032	1712	3144	1469	2917	1642	2870	2933	3732	3117	2992	3017	3018	3018	3002	1695	5683	2944	2979	2913	1583	2990	2916	1463	2975	3012	3115	2963	5907	2848	1580	3088	3000	2942	3587	1758	1949	2948	2893	1667	3079	2877	2921
AH90	2880	2888	6880	2252	2893	1827	3033	1713	3145	1470	2918	1643	2871	2934	3733	3118	2993	3018	3019	3019	3003	1696	5684	2945	2980	2914	1584	2991	2917	1464	2976	3013	3116	2964	5908	2849	1581	3089	3001	2943	3588	1759	1950	2949	2894	1668	3080	2878	2922
GZ86	2880	2888	6882	2252	2893	1827	3033	1713	3145	1470	2918	1643	2871	2934	3733	3118	2993	3018	3019	3019	3003	1696	5684	2945	2980	2914	1584	2991	2917	1464	2976	3013	3116	2964	5908	2849	1581	3089	3001	2943	3588	1759	1950	2949	2894	1668	3080	2878	2922
HUN49	1176	1009	6869	2786	1014	2998	662	3029	918	3025	412	2997	1098	739	2103	1574	1246	719	648	648	1273	3012	5643	1212	656	1677	2983	1241	1823	3010	1260	1174	1572	1295	5907	911	2950	1549	1245	1460	3300	3088	3158	754	1551	2970	1417	483	634
AH47	2885	2893	6885	2259	2898	1832	3038	1718	3150	1475	2923	1648	2876	2939	3738	3123	2998	3023	3024	3024	3008	1701	5689	2950	2985	2919	1589	2996	2922	1469	2981	3018	3121	2969	5913	2854	1586	3094	3006	2948	3593	1764	1953	2954	2899	1673	3085	2883	2927
HUNS46	2963	3016	6846	2083	3021	1713	3101	414	3196	1626	3008	1501	2968	3048	3730	3159	3084	3093	3089	3089	3094	1598	5615	3076	3079	2845	1941	3086	2857	1634	3067	3076	3157	3008	5849	2932	2025	3133	3058	3030	3586	1665	1736	3075	2881	1641	3136	2980	3062
SH41	1182	1015	6875	2792	1020	3004	668	3035	924	3031	418	3003	1104	745	2109	1580	1252	725	654	654	1279	3018	5649	1218	662	1683	2989	1247	1829	3016	1266	1180	1578	1301	5913	917	2956	1555	1251	1466	3306	3094	3164	760	1557	2976	1423	489	640
HUN112	1391	1326	7160	3123	1331	3304	1857	3377	1934	3337	1648	3330	1553	1682	2857	1980	482	1805	1845	1845	459	3349	5838	1545	1589	2148	3297	469	2177	3314	439	1205	1978	1295	6139	1779	3296	1956	1577	1382	3581	3407	3459	1695	1702	3294	665	1638	1596
HUN38	1258	644	6935	2817	649	2976	1333	3028	1435	3002	1077	3024	1331	431	1967	1821	1428	1241	1321	1321	1466	3035	5652	1401	1180	1742	2985	1434	1882	3007	1439	1507	1819	1488	5980	682	2965	1798	1428	1653	3261	3141	3172	472	1658	2967	1612	1134	541
S99	2905	2915	6895	2270	2920	1841	3058	1735	3170	1484	2943	1655	2896	2959	3726	3143	3016	3045	3044	3044	3026	1714	5670	2970	3005	2935	1614	3014	2940	1476	3001	3040	3141	2989	5931	2874	1603	3114	3028	2966	3589	1736	1968	2974	2919	1686	3105	2903	2945
XD101	5716	5690	6882	5770	5695	5665	5723	5702	5724	5699	5724	5717	5735	5723	5087	5682	5704	5653	5723	5723	5724	5780	2819	5707	5768	5667	5781	5708	5668	5708	5694	5708	5680	5740	5282	5698	5782	5658	5714	5690	5786	5690	5775	5748	5697	5719	5699	5728	5722
S212	1434	882	6915	2977	887	3188	1470	3187	1529	3148	1238	3148	1462	605	1994	1971	1538	1393	1458	1458	1549	3128	5539	1559	1299	1990	3111	1535	2173	3133	1532	1618	1969	1591	5938	815	3084	1948	1540	1724	3438	3226	3259	584	1801	3095	1719	1251	648
FY219	1380	825	6911	2939	830	3126	1381	3108	1417	3114	1124	3086	1388	600	1822	1888	1530	1258	1367	1367	1560	3095	5687	1497	1176	1899	3024	1544	2057	3094	1527	1573	1886	1521	5992	733	3024	1867	1504	1783	3329	3217	3267	577	1785	3068	1700	1142	541
FY227	1380	825	6911	2939	830	3126	1381	3108	1417	3114	1124	3086	1388	600	1822	1888	1530	1258	1367	1367	1560	3095	5687	1497	1176	1899	3024	1544	2057	3094	1527	1573	1886	1521	5992	733	3024	1867	1504	1783	3329	3217	3267	577	1785	3068	1700	1142	541
SD7	1483	1514	6914	2861	1519	3073	1588	3090	1741	3120	1375	3011	684	1402	2599	1756	1376	1542	1576	1576	1379	3062	5672	1280	1432	1794	2995	1371	1960	3105	1363	1524	1754	551	5933	1495	3040	1735	1113	1281	3307	3095	3212	1409	1783	2997	1505	1382	1319
XJ35	3031	3088	6851	2381	3093	1934	3213	1799	3270	1806	3116	1890	3071	3116	3412	3211	3142	3148	3199	3199	3159	1836	5555	3117	3158	3010	2262	3149	3042	1814	3142	3139	3207	3120	5815	3016	2242	3188	3204	3110	3698	1843	732	3145	2963	1399	3209	3066	3114
GS82	3033	3090	6853	2383	3095	1936	3215	1801	3272	1808	3118	1892	3073	3118	3414	3213	3144	3150	3201	3201	3161	1838	5557	3119	3160	3012	2264	3151	3044	1816	3144	3141	3209	3122	5817	3018	2244	3190	3206	3112	3700	1845	734	3147	2965	1401	3211	3068	3116
SD12	884	650	6845	2743	655	2888	1073	2974	1250	2952	831	2927	1179	1002	2225	1607	981	1111	1061	1061	982	2931	5612	1181	1001	1698	2924	972	1893	2931	967	853	1603	1018	5867	1175	2879	1584	1239	1219	3258	3029	3036	1019	1171	2889	1124	882	942
LN73	886	652	6847	2745	657	2890	1075	2976	1252	2954	833	2929	1181	1004	2227	1609	983	1113	1063	1063	984	2933	5614	1183	1003	1700	2926	974	1895	2933	969	855	1605	1020	5869	1177	2881	1586	1241	1221	3260	3031	3038	1021	1173	2891	1126	884	944
SAX2	1191	1203	6923	2859	1208	3011	1556	3090	1673	3050	1349	3025	1194	1417	2551	1615	538	1534	1544	1544	519	3033	5633	1205	1308	1870	2963	529	1893	3037	505	1134	1611	1079	5910	1465	2990	1593	1179	1167	3332	3101	3181	1434	1519	3011	725	1357	1339
HUN45	2937	3000	6877	2070	3005	1682	3090	490	3175	1650	2987	1516	2952	3027	3704	3137	3076	3067	3078	3078	3082	1593	5635	3055	3059	2823	1912	3072	2832	1650	3053	3054	3135	2995	5889	2915	2013	3109	3036	3019	3590	1629	1799	3052	2855	1600	3132	2941	3041
HUN56	2937	3000	6877	2070	3005	1682	3090	490	3175	1650	2987	1516	2952	3027	3704	3137	3076	3067	3078	3078	3082	1593	5635	3055	3059	2823	1912	3072	2832	1650	3053	3054	3135	2995	5889	2915	2013	3109	3036	3019	3590	1629	1799	3052	2855	1600	3132	2941	3041
CQ42	2939	3002	6879	2072	3007	1684	3092	492	3177	1652	2989	1518	2954	3029	3706	3139	3078	3069	3080	3080	3084	1595	5637	3057	3061	2825	1914	3074	2834	1652	3055	3056	3137	2997	5891	2917	2015	3111	3038	3021	3592	1631	1801	3054	2857	1602	3134	2943	3043
CQ48	2939	3002	6879	2072	3007	1684	3092	492	3177	1652	2989	1518	2954	3029	3706	3139	3078	3069	3080	3080	3084	1595	5637	3057	3061	2825	1914	3074	2834	1652	3055	3056	3137	2997	5891	2917	2015	3111	3038	3021	3592	1631	1801	3054	2857	1602	3134	2943	3043
FY209	1429	948	6900	2934	953	3113	1208	3125	1313	3114	1115	3094	1441	543	2166	1846	1425	1273	1196	1196	1439	3130	5634	1483	1144	1764	3116	1433	1975	3096	1420	1504	1844	1543	5956	634	3083	1825	1550	1563	3346	3210	3265	522	1712	3091	1462	1130	615
HUN109	2737	2807	6969	695	2812	2174	2875	2069	3024	2127	2791	2159	2752	2908	3522	2911	2790	2932	2871	2871	2814	2142	5718	2869	2902	2713	2302	2793	2721	2102	2791	2908	2909	2788	5944	2803	2545	2885	2818	2799	3586	2182	2335	2905	2759	2163	2856	2787	2833
QH12	1921	1942	6940	2697	1947	2964	1962	2932	2067	3008	1859	2986	1932	1875	2958	1860	1917	1884	1950	1950	1954	2994	5717	1857	1868	752	3000	1928	526	3003	1929	2017	1856	1972	5922	1979	2917	1837	1865	1937	3348	3031	3080	1932	1591	2932	1822	1941	1866
QH4	1921	1942	6940	2697	1947	2964	1962	2932	2067	3008	1859	2986	1932	1875	2958	1860	1917	1884	1950	1950	1954	2994	5717	1857	1868	752	3000	1928	526	3003	1929	2017	1856	1972	5922	1979	2917	1837	1865	1937	3348	3031	3080	1932	1591	2932	1822	1941	1866
QH5	1921	1942	6940	2697	1947	2964	1962	2932	2067	3008	1859	2986	1932	1875	2958	1860	1917	1884	1950	1950	1954	2994	5717	1857	1868	752	3000	1928	526	3003	1929	2017	1856	1972	5922	1979	2917	1837	1865	1937	3348	3031	3080	1932	1591	2932	1822	1941	1866
QH10	1643	1739	6960	3029	1744	3143	1681	3125	1789	3121	1561	3060	1443	1536	2745	1839	1524	1732	1669	1669	1543	3037	5546	1465	1455	1874	3049	1517	2032	3107	1530	1620	1835	1547	5904	1631	3035	1818	1433	1589	3419	3090	3199	1557	1770	3052	1596	1554	1475
QH6	1643	1739	6960	3029	1744	3143	1681	3125	1789	3121	1561	3060	1443	1536	2745	1839	1524	1732	1669	1669	1543	3037	5546	1465	1455	1874	3049	1517	2032	3107	1530	1620	1835	1547	5904	1631	3035	1818	1433	1589	3419	3090	3199	1557	1770	3052	1596	1554	1475
QH8	1643	1739	6960	3029	1744	3143	1681	3125	1789	3121	1561	3060	1443	1536	2745	1839	1524	1732	1669	1669	1543	3037	5546	1465	1455	1874	3049	1517	2032	3107	1530	1620	1835	1547	5904	1631	3035	1818	1433	1589	3419	3090	3199	1557	1770	3052	1596	1554	1475
QH9	1643	1739	6960	3029	1744	3143	1681	3125	1789	3121	1561	3060	1443	1536	2745	1839	1524	1732	1669	1669	1543	3037	5546	1465	1455	1874	3049	1517	2032	3107	1530	1620	1835	1547	5904	1631	3035	1818	1433	1589	3419	3090	3199	1557	1770	3052	1596	1554	1475
CQ31	2869	2900	6894	2302	2905	1813	3039	1712	3151	1500	2924	1613	2857	2950	3743	3071	2979	3042	3023	3023	2991	1694	5674	2939	2992	2906	1576	2983	2911	1496	2968	3021	3067	2952	5904	2860	1609	3046	3001	2932	3590	1745	1898	2965	2888	1621	3072	2886	2932
NMG22	3121	3229	7154	2449	3234	2072	3343	1913	3445	1912	3248	2057	3207	3269	3953	3298	3216	3292	3331	3331	3239	1974	5924	3238	3304	3062	2450	3217	3086	1924	3212	3268	3296	3212	6114	3118	2476	3271	3276	3196	3865	2017	935	3296	3101	1552	3277	3248	3266
XJ17	2726	2800	6990	749	2805	2194	2866	2112	3010	2144	2782	2172	2754	2903	3524	2916	2778	2923	2862	2862	2803	2161	5741	2874	2890	2699	2324	2786	2707	2119	2784	2896	2912	2787	5959	2797	2552	2892	2818	2788	3577	2193	2338	2900	2743	2176	2846	2788	2818
HUN82	1501	940	6903	2829	945	3038	1288	3023	1350	3013	1160	2970	1173	632	2045	1829	1402	1269	1274	1274	1432	3001	5620	1428	1011	1734	2977	1408	1973	3004	1411	1492	1827	1503	5918	662	2968	1806	1384	1526	3209	3111	3162	607	1631	2963	1489	1111	680
HUN9	5681	5633	6735	5655	5638	5546	5650	5584	5591	5617	5653	5538	5638	5650	5283	5680	5640	5647	5650	5650	5668	5682	4024	5645	5695	5625	5679	5645	5638	5617	5636	5571	5678	5651	5241	5634	5649	5656	5658	5605	5679	5613	5668	5690	5615	5592	5649	5651	5663
CQ27	1222	1095	6943	2902	1100	3065	968	3132	1190	3089	720	3091	1156	971	2254	1722	1302	966	956	956	1327	3104	5706	1204	926	1796	3044	1295	1965	3074	1314	1212	1720	1345	5975	1152	3015	1697	1285	1500	3392	3164	3198	986	1613	3040	1469	723	876
HUN14	1223	1096	6944	2903	1101	3066	969	3133	1191	3090	721	3092	1157	972	2255	1723	1303	967	957	957	1328	3105	5707	1205	927	1797	3045	1296	1966	3075	1315	1213	1721	1346	5976	1153	3016	1698	1286	1501	3393	3165	3199	987	1614	3041	1470	724	877
FY183	1395	830	6899	2827	835	3022	1435	3041	1587	3085	1179	3023	1467	731	1907	1860	1535	1314	1423	1423	1563	3072	5691	1538	1286	1833	2981	1551	1802	3066	1534	1578	1856	1534	5988	788	2952	1839	1575	1784	3288	3165	3201	708	1800	3012	1709	1256	672
AH88	2867	2895	6855	2213	2900	1752	3003	1669	3113	1438	2889	1509	2833	2935	3672	3077	2942	2985	2989	2989	2953	1587	5676	2927	2946	2912	1600	2943	2923	1438	2926	2981	3075	2918	5871	2849	1552	3048	2941	2896	3554	1694	1885	2950	2873	1656	3030	2849	2896
CQ7	1629	1295	6892	2974	1300	3128	620	3192	1293	3168	869	3114	1498	941	2230	1959	1700	1309	608	608	1707	3150	5472	1576	1109	1896	3153	1697	2054	3150	1690	1600	1957	1702	5888	1107	3116	1936	1643	1443	3455	3238	3309	956	1782	3129	1684	1115	954
CQ8	966	870	6854	2810	875	2939	1156	2999	1296	2972	947	2960	1139	1174	2373	1578	795	1165	1144	1144	796	2946	5579	1183	1021	1746	2971	804	1864	2951	777	607	1574	998	5859	1341	2909	1557	1276	1163	3263	3051	3060	1209	1234	2913	998	1004	1128
JS77	2934	3003	6920	2151	3008	1704	3057	1627	3183	1566	2959	1658	2934	3022	3683	3120	3080	3037	3051	3051	3102	1560	5673	3020	3042	2879	2023	3081	2928	1566	3079	3074	3116	3039	5889	2915	2050	3095	3079	3041	3528	620	1820	3039	2876	1556	3120	2923	3014
SAX32	2934	3003	6920	2151	3008	1704	3057	1627	3183	1566	2959	1658	2934	3022	3683	3120	3080	3037	3051	3051	3102	1560	5673	3020	3042	2879	2023	3081	2928	1566	3079	3074	3116	3039	5889	2915	2050	3095	3079	3041	3528	620	1820	3039	2876	1556	3120	2923	3014
HUBJ28	1378	1196	6879	2831	1201	3041	1176	3066	1298	3073	988	3024	1195	1087	2377	1686	1201	1161	1160	1160	1233	3063	5616	1219	1059	1651	2981	1197	1817	3070	1212	1287	1684	1296	5885	1307	2974	1663	1259	1406	3308	3126	3168	1096	1502	2995	1359	1004	1002
CQ92	2998	3040	6912	2327	3045	1727	3065	1798	3217	1664	2979	1693	2999	3018	3721	3145	3072	3106	3051	3051	3068	1594	5676	3034	3042	2941	2006	3082	2924	1655	3051	3099	3141	3031	5891	2867	2169	3118	3060	3026	3555	1879	1977	3051	2951	1702	3128	2912	3030
NX2	1555	1556	6883	2740	1561	2903	1699	2966	1786	2942	1524	2858	827	1591	2730	1687	1440	1677	1685	1685	1423	2896	5580	1362	1596	1875	2847	1435	1982	2927	1394	1577	1685	1007	5843	1676	2939	1664	1243	1085	3249	2923	3012	1596	1757	2855	1515	1498	1542
S73	2921	3025	6888	2163	3030	1674	3108	1570	3238	1649	3019	1711	2955	3063	3722	3099	3046	3117	3104	3104	3070	1568	5666	2984	3094	2914	2017	3048	2953	1651	3038	3063	3097	3045	5865	2946	2084	3072	3056	3022	3541	1563	968	3082	2874	1081	3152	2984	3037
GZ16	2862	2899	6876	2319	2904	1731	3030	1756	3144	1533	2915	1527	2842	2943	3730	3054	2975	3031	3014	3014	2987	1654	5674	2933	2985	2890	1606	2975	2899	1529	2960	3020	3052	2940	5882	2856	1609	3027	3001	2924	3564	1704	1874	2960	2872	1631	3066	2881	2929
GZ40	2932	3032	6894	2179	3037	1685	3109	1585	3239	1664	3020	1724	2956	3070	3730	3100	3058	3118	3105	3105	3071	1585	5676	2992	3095	2922	2030	3049	2961	1666	3049	3064	3098	3046	5870	2956	2097	3073	3056	3023	3551	1578	983	3089	2875	1098	3153	2987	3041
LN74	1455	1079	7104	3122	1084	3330	1594	3327	1707	3320	1340	3282	1584	801	2351	2020	1594	1492	1582	1582	1607	3308	5910	1629	1423	2048	3314	1593	2220	3303	1601	1746	2016	1561	6164	936	3260	1997	1621	1851	3594	3411	3441	778	1936	3276	1761	1302	766
LN75	1455	1079	7104	3122	1084	3330	1594	3327	1707	3320	1340	3282	1584	801	2351	2020	1594	1492	1582	1582	1607	3308	5910	1629	1423	2048	3314	1593	2220	3303	1601	1746	2016	1561	6164	936	3260	1997	1621	1851	3594	3411	3441	778	1936	3276	1761	1302	766
XD115	1328	1125	6903	2813	1130	2964	983	3024	1051	3020	769	2969	1001	972	2243	1666	1210	973	971	971	1185	2970	5662	1222	803	1767	2929	1205	1923	2999	1172	1237	1664	1108	5940	1202	2947	1643	1247	1407	3357	3085	3173	985	1574	2975	1367	850	873
S191	1333	1130	6906	2818	1135	2969	988	3028	1056	3025	774	2974	1006	977	2248	1671	1215	978	976	976	1190	2975	5667	1227	808	1772	2934	1210	1928	3004	1177	1242	1669	1113	5943	1207	2952	1648	1252	1412	3362	3089	3177	990	1579	2979	1372	855	878
HUN13	1428	1353	6855	2847	1358	2962	1453	3001	1622	2979	1263	2952	1404	1313	2556	1860	1378	1498	1435	1435	1381	2987	5624	1375	1420	1903	2979	1371	1942	2960	1364	1464	1858	1395	5884	1396	2970	1837	1464	1508	3280	3055	3093	1286	1649	2958	1473	1293	1186
FY74	1450	1278	6932	2885	1283	3120	1253	3149	1385	3153	1065	3103	1254	1162	2438	1764	1291	1243	1237	1237	1325	3140	5705	1291	1131	1723	3066	1291	1915	3149	1302	1357	1762	1358	5947	1382	3061	1741	1334	1477	3381	3198	3235	1169	1581	3071	1451	1067	1079
LN44	1452	1280	6934	2890	1285	3126	1253	3155	1385	3157	1065	3107	1254	1166	2440	1764	1293	1243	1237	1237	1323	3145	5709	1293	1131	1727	3068	1291	1919	3154	1306	1355	1760	1356	5945	1383	3063	1741	1334	1475	3382	3203	3239	1173	1579	3078	1451	1067	1081
JX18	1336	1177	6908	2800	1182	3030	1226	3064	1316	3068	979	3042	1179	1045	2323	1663	1222	1101	1208	1208	1247	3079	5674	1253	1042	1607	3004	1216	1826	3069	1225	1292	1661	1257	5943	1262	3014	1639	1296	1458	3337	3131	3161	1050	1512	3006	1361	992	958
JX4	1110	989	6849	2858	994	3012	796	3070	1318	3043	1017	3011	1330	1285	2488	1757	1170	1292	786	786	1161	3031	5602	1367	1147	1807	3055	1161	1958	3025	1142	783	1753	1164	5858	1452	2997	1736	1509	999	3387	3125	3137	1320	1288	3006	1138	1093	1281
JX42	1110	989	6849	2858	994	3012	796	3070	1318	3043	1017	3011	1330	1285	2488	1757	1170	1292	786	786	1161	3031	5602	1367	1147	1807	3055	1161	1958	3025	1142	783	1753	1164	5858	1452	2997	1736	1509	999	3387	3125	3137	1320	1288	3006	1138	1093	1281
SHB6	1340	1263	6882	2885	1268	3023	1173	3052	1314	3059	970	3032	1267	1103	2391	1516	1355	1119	1159	1159	1393	3011	5622	1323	1038	1620	3040	1365	1825	3051	1355	1186	1514	1362	5909	1257	2960	1491	1391	1459	3311	3125	3184	1136	1679	2982	1471	977	1062
FY230	2891	2986	6909	2148	2991	853	3014	1499	3100	1452	2938	1418	2898	3026	3714	3086	2986	3017	3010	3010	3009	1369	5672	2986	3005	2912	1832	2985	2886	1460	2982	2975	3084	2966	5879	2912	1942	3057	3022	2932	3533	1609	1731	3047	2836	1321	3059	2881	3005
GX29	2893	2988	6911	2150	2993	855	3016	1501	3102	1454	2940	1420	2900	3028	3716	3088	2988	3019	3012	3012	3011	1371	5674	2988	3007	2914	1834	2987	2888	1462	2984	2977	3086	2968	5881	2914	1944	3059	3024	2934	3535	1611	1733	3049	2838	1323	3061	2883	3007
SH71	1348	1259	6989	2919	1264	3066	1064	3141	1235	3120	903	3057	1325	1123	2480	1718	1412	1132	1052	1052	1413	3111	5753	1387	951	1669	3060	1405	1840	3109	1390	1249	1716	1411	5981	1343	3032	1693	1434	1504	3392	3150	3225	1134	1435	3031	1417	1030	1032
SH48	807	1591	6933	2697	1596	2989	1540	2990	1814	2991	1377	2914	1580	1542	2749	1872	1655	1665	1528	1528	1674	2963	5720	1578	1473	1780	2946	1654	1875	2990	1648	1631	1870	1591	5951	1638	2935	1849	1577	1693	3348	3008	3055	1583	1587	2843	1704	1537	1491
SH60	807	1591	6933	2697	1596	2989	1540	2990	1814	2991	1377	2914	1580	1542	2749	1872	1655	1665	1528	1528	1674	2963	5720	1578	1473	1780	2946	1654	1875	2990	1648	1631	1870	1591	5951	1638	2935	1849	1577	1693	3348	3008	3055	1583	1587	2843	1704	1537	1491
XD36	1527	1348	6919	2865	1353	3084	1355	3080	1522	3099	1165	3044	1328	1194	2483	1721	1372	1329	1339	1339	1412	3083	5685	1352	1258	1674	3001	1382	1842	3097	1388	1418	1717	1453	5925	1376	3005	1700	1454	1539	3328	3130	3194	1215	1674	3016	1546	1157	1167
XD11	1528	1349	6920	2866	1354	3085	1356	3081	1523	3100	1166	3045	1329	1195	2484	1722	1373	1330	1340	1340	1413	3084	5686	1353	1259	1675	3002	1383	1843	3098	1389	1419	1718	1454	5926	1377	3006	1701	1455	1540	3329	3131	3195	1216	1675	3017	1547	1158	1168
XD33	1528	1349	6920	2866	1354	3085	1356	3081	1523	3100	1166	3045	1329	1195	2484	1722	1373	1330	1340	1340	1413	3084	5686	1353	1259	1675	3002	1383	1843	3098	1389	1419	1718	1454	5926	1377	3006	1701	1455	1540	3329	3131	3195	1216	1675	3017	1547	1158	1168
XD35	1528	1349	6920	2866	1354	3085	1356	3081	1523	3100	1166	3045	1329	1195	2484	1722	1373	1330	1340	1340	1413	3084	5686	1353	1259	1675	3002	1383	1843	3098	1389	1419	1718	1454	5926	1377	3006	1701	1455	1540	3329	3131	3195	1216	1675	3017	1547	1158	1168
FY197	1521	1358	6921	2862	1363	3088	1349	3080	1512	3097	1161	3042	1314	1196	2485	1715	1376	1321	1333	1333	1404	3082	5682	1358	1254	1694	3001	1376	1862	3094	1394	1410	1711	1443	5923	1373	3007	1692	1446	1527	3336	3127	3192	1219	1680	3013	1538	1143	1155
S47	1633	1657	6921	2807	1662	2996	1734	3032	1827	3032	1595	2920	978	1702	2768	1591	1542	1756	1724	1724	1526	2968	5643	1472	1621	1914	2928	1542	2044	3017	1499	1632	1587	1092	5852	1757	3001	1570	1412	1249	3252	3011	3127	1703	1820	2939	1593	1610	1645
FY217	1636	1660	6922	2810	1665	2999	1737	3035	1830	3035	1598	2923	981	1705	2771	1594	1544	1759	1727	1727	1528	2971	5646	1474	1624	1917	2931	1544	2047	3020	1501	1634	1590	1095	5855	1760	3004	1573	1414	1251	3255	3014	3130	1706	1823	2942	1595	1613	1648
S201	1736	1857	6899	2706	1862	2977	1711	2958	1992	3013	1610	2951	1757	1749	2832	1718	1870	1724	1697	1697	1905	2915	5663	1711	1698	892	3023	1875	1153	3014	1874	1899	1716	1868	5891	1800	2988	1695	1682	1820	3267	2975	3041	1788	1503	2900	1789	1772	1724
GZ51	892	1580	6923	2713	1585	3025	1476	3013	1806	3034	1376	2975	1623	1561	2755	1859	1646	1666	1464	1464	1645	3007	5696	1571	1561	1708	3004	1645	1789	3033	1621	1680	1857	1650	5925	1630	2987	1834	1625	1691	3392	3021	3123	1574	1625	2923	1537	1558	1482
HUN16	1666	1846	6880	2656	1851	2871	1863	2878	2080	2920	1697	2848	1716	1828	2770	1991	1817	1894	1847	1847	1866	2818	5640	1764	1785	1742	2833	1824	1834	2914	1826	1883	1989	1757	5884	1825	2846	1965	1748	1875	3221	2891	2978	1858	1551	2776	1896	1871	1801
HLJ5	1667	1847	6881	2655	1852	2870	1864	2877	2081	2919	1698	2847	1717	1827	2771	1992	1818	1893	1848	1848	1867	2817	5641	1765	1786	1743	2832	1825	1833	2913	1827	1884	1990	1758	5885	1826	2845	1966	1749	1876	3224	2890	2977	1859	1552	2775	1897	1872	1802
GS16	1669	1848	6884	2659	1853	2876	1868	2883	2085	2925	1702	2851	1721	1831	2773	1994	1820	1899	1852	1852	1869	2823	5642	1767	1790	1747	2836	1829	1839	2919	1831	1886	1992	1760	5886	1828	2849	1970	1752	1878	3228	2893	2981	1863	1553	2781	1901	1876	1804
SAX11	1741	1185	6914	2148	1190	2678	1761	2710	1949	2696	1513	2633	1714	1147	2015	2235	1887	1717	1757	1757	1903	2713	5661	1890	1661	2058	2757	1894	2198	2675	1884	1934	2231	1887	5943	1178	2827	2214	1917	2115	3284	2764	2863	1124	2133	2599	2055	1573	1070
HB11	1370	1255	6921	2848	1260	3016	1254	3061	1361	3052	1007	3035	1181	1123	2343	1682	1302	1128	1238	1238	1327	3078	5673	1227	1069	1651	2986	1298	1878	3053	1307	1349	1680	1269	5957	1300	3006	1662	1300	1506	3361	3105	3149	1130	1584	2986	1443	1011	1036
HB17	1370	1255	6921	2848	1260	3016	1254	3061	1361	3052	1007	3035	1181	1123	2343	1682	1302	1128	1238	1238	1327	3078	5673	1227	1069	1651	2986	1298	1878	3053	1307	1349	1680	1269	5957	1300	3006	1662	1300	1506	3361	3105	3149	1130	1584	2986	1443	1011	1036
SAX21	1688	1868	6900	2678	1873	2893	1885	2900	2102	2942	1719	2870	1738	1850	2792	2013	1839	1916	1869	1869	1888	2840	5662	1786	1807	1764	2855	1846	1856	2936	1848	1905	2011	1779	5904	1847	2868	1989	1770	1897	3243	2913	3000	1880	1573	2798	1918	1893	1823
HUBJ24	1782	1227	6905	2581	1232	2611	1808	2625	1929	2612	1552	2572	1733	1143	1960	2243	1930	1719	1794	1794	1946	2582	5692	1855	1680	2148	2708	1934	2308	2594	1925	1973	2239	1909	5959	1027	2674	2220	1836	2138	3328	2649	2751	1120	2154	2497	2094	1596	1079
AH96	1951	1361	6949	3405	1366	3521	1993	3544	2105	3487	1739	3514	2010	927	968	2516	2147	1909	1979	1979	2164	3530	5314	2075	1808	2448	3503	2162	2567	3478	2149	2197	2512	2194	5861	1214	3472	2493	2063	2385	3613	3649	3659	1048	2398	3444	2318	1736	1154
HUBJ16	1772	1217	6904	2571	1222	2593	1798	2607	1913	2594	1542	2554	1721	1133	1956	2233	1918	1707	1784	1784	1934	2564	5674	1843	1668	2138	2690	1922	2296	2576	1913	1957	2229	1905	5955	1017	2658	2210	1826	2128	3320	2633	2735	1110	2144	2479	2082	1580	1069
HUBJ20	1772	1217	6904	2571	1222	2593	1798	2607	1913	2594	1542	2554	1721	1133	1956	2233	1918	1707	1784	1784	1934	2564	5674	1843	1668	2138	2690	1922	2296	2576	1913	1957	2229	1905	5955	1017	2658	2210	1826	2128	3320	2633	2735	1110	2144	2479	2082	1580	1069
HUNS48	1276	1218	6858	2764	1223	2916	1373	3044	1527	2989	1153	2958	1177	1155	2368	1675	1254	1321	1359	1359	1291	2959	5593	1059	1277	1644	2906	1261	1762	2971	1254	1328	1673	1280	5862	1240	2909	1652	1164	1426	3208	3065	3073	1162	1544	2913	1409	1147	1072
HUN83	2293	2344	6975	2612	2349	2516	2349	2494	2509	2457	2221	2487	2282	2363	3017	2348	2309	2285	2345	2345	2348	2472	5659	2294	2320	1436	2659	2319	1014	2460	2319	2458	2344	2356	5944	2266	2490	2325	2278	2380	3364	2558	2721	2420	2126	2408	2270	2425	2361
HUN105	2295	2346	6975	2614	2351	2518	2351	2496	2511	2459	2223	2489	2284	2365	3019	2350	2311	2287	2347	2347	2350	2474	5660	2296	2322	1438	2661	2321	1016	2462	2321	2460	2346	2358	5946	2268	2492	2327	2280	2382	3366	2560	2723	2422	2128	2410	2272	2427	2363
CQ46	2297	2348	6978	2616	2353	2520	2353	2498	2513	2461	2225	2491	2286	2367	3021	2352	2313	2289	2349	2349	2352	2476	5663	2298	2324	1440	2663	2323	1018	2464	2323	2462	2348	2360	5948	2270	2494	2329	2282	2384	3368	2562	2725	2424	2130	2412	2274	2429	2365
CQ51	2297	2348	6978	2616	2353	2520	2353	2498	2513	2461	2225	2491	2286	2367	3021	2352	2313	2289	2349	2349	2352	2476	5663	2298	2324	1440	2663	2323	1018	2464	2323	2462	2348	2360	5948	2270	2494	2329	2282	2384	3368	2562	2725	2424	2130	2412	2274	2429	2365
NMG46	2297	2348	6978	2616	2353	2520	2353	2498	2513	2461	2225	2491	2286	2367	3021	2352	2313	2289	2349	2349	2352	2476	5663	2298	2324	1440	2663	2323	1018	2464	2323	2462	2348	2360	5948	2270	2494	2329	2282	2384	3368	2562	2725	2424	2130	2412	2274	2429	2365
GZ64	2299	2350	6980	2618	2355	2522	2355	2500	2515	2463	2227	2493	2288	2369	3023	2354	2315	2291	2351	2351	2354	2478	5665	2300	2326	1442	2665	2325	1020	2466	2325	2464	2350	2362	5950	2272	2496	2331	2284	2386	3370	2564	2727	2426	2132	2414	2276	2431	2367
LN10	2300	2351	6981	2619	2356	2523	2356	2501	2516	2464	2228	2494	2289	2370	3024	2355	2316	2292	2352	2352	2355	2479	5666	2301	2327	1443	2666	2326	1021	2467	2326	2465	2351	2363	5951	2273	2497	2332	2285	2387	3369	2565	2728	2427	2133	2415	2277	2432	2368
LN32	2302	2353	6983	2621	2358	2525	2358	2503	2518	2466	2230	2496	2291	2372	3026	2357	2318	2294	2354	2354	2357	2481	5668	2303	2329	1445	2668	2328	1023	2469	2328	2467	2353	2365	5953	2275	2499	2334	2287	2389	3371	2567	2730	2429	2135	2417	2279	2434	2370
FY44	2307	2358	6986	2626	2363	2530	2363	2508	2523	2471	2235	2501	2296	2377	3031	2362	2323	2299	2359	2359	2362	2486	5673	2308	2334	1450	2673	2333	1028	2474	2333	2472	2358	2370	5958	2280	2504	2339	2292	2394	3376	2572	2735	2434	2140	2422	2284	2439	2375
XJ49	2318	2369	7001	2637	2374	2541	2374	2519	2534	2482	2246	2512	2307	2388	3042	2373	2334	2310	2370	2370	2373	2497	5684	2319	2345	1461	2684	2344	1039	2485	2344	2483	2369	2381	5969	2291	2515	2350	2303	2405	3389	2583	2746	2445	2151	2433	2295	2450	2386
GZ10	1669	1775	6855	2789	1780	2963	1807	3025	1959	2985	1572	2951	1693	1724	2883	1279	1695	1799	1793	1793	1691	2935	5547	1611	1712	1893	2993	1689	2016	2972	1668	1759	1277	1674	5805	1757	2999	1254	1695	1743	3315	2980	3008	1755	1946	2888	1825	1631	1703
GZ31	1669	1775	6855	2789	1780	2963	1807	3025	1959	2985	1572	2951	1693	1724	2883	1279	1695	1799	1793	1793	1691	2935	5547	1611	1712	1893	2993	1689	2016	2972	1668	1759	1277	1674	5805	1757	2999	1254	1695	1743	3315	2980	3008	1755	1946	2888	1825	1631	1703
SD28	1456	1415	6931	2872	1420	3058	1509	3100	1629	3103	1346	3009	1326	1309	2542	1650	1467	1488	1495	1495	1502	3069	5627	1349	1368	1625	2983	1477	1827	3095	1468	1476	1647	1423	5901	1417	3027	1629	1413	1595	3281	3117	3188	1319	1626	3018	1501	1350	1223
CQ79	1874	1323	6864	3122	1328	3292	1896	3294	2001	3297	1642	3246	1854	1177	1961	2341	2043	1731	1882	1882	2053	3301	5641	1962	1724	2326	3250	2041	2449	3278	2038	2084	2339	2040	5916	1277	3198	2318	1945	2265	3470	3400	3388	1157	2285	3178	2199	1675	1113
XD38	2815	2883	6897	2365	2888	1863	3010	1759	3114	1593	2904	1647	2808	2965	3701	3103	2888	3005	2994	2994	2899	1730	5639	2949	2967	2835	1645	2887	2851	1599	2872	2925	3101	2867	5891	2892	1734	3073	2949	2872	3505	1859	2000	2978	2791	1708	2963	2890	2918
SD40	1928	1365	6864	3124	1370	3295	1860	3300	1924	3310	1685	3242	1897	1228	2063	2322	2048	1728	1844	1844	2056	3308	5650	1991	1671	2249	3246	2046	2349	3293	2041	2040	2320	2015	5905	1369	3209	2299	1982	2200	3445	3415	3409	1205	2136	3191	2062	1744	1155
HB36	1932	1369	6868	3128	1374	3299	1864	3304	1928	3314	1689	3246	1901	1232	2067	2326	2052	1732	1848	1848	2060	3312	5654	1995	1675	2253	3250	2050	2353	3297	2045	2044	2324	2019	5909	1373	3213	2303	1986	2204	3449	3419	3414	1209	2140	3196	2066	1748	1159
SH90	3000	3062	7029	2047	3067	1655	3094	1662	3201	1438	3011	1576	2946	3076	3779	3121	3070	3075	3090	3090	3102	1530	5788	3056	3088	2923	2017	3076	2893	1438	3079	3081	3119	3031	5999	2970	2025	3094	3063	2971	3587	1095	1828	3103	2912	1585	3131	3022	3054
GX18	1424	1339	6893	2836	1344	2955	1457	3081	1533	3019	1294	2999	1298	1293	2460	1742	1365	1369	1443	1443	1402	3006	5612	1212	1333	1682	2950	1372	1721	3007	1365	1406	1740	1391	5875	1379	2973	1719	1284	1521	3216	3110	3141	1301	1498	2971	1398	1288	1205
GZ29	1440	1457	6960	2997	1462	3095	1576	3147	1791	3124	1360	3045	1381	1601	2653	1816	1227	1609	1562	1562	1224	3136	5657	1361	1509	2016	3059	1224	2085	3117	1183	1455	1814	1283	5976	1640	3082	1794	1505	1481	3454	3184	3234	1610	1792	3086	1330	1511	1509
GZ9	1440	1457	6960	2997	1462	3095	1576	3147	1791	3124	1360	3045	1381	1601	2653	1816	1227	1609	1562	1562	1224	3136	5657	1361	1509	2016	3059	1224	2085	3117	1183	1455	1814	1283	5976	1640	3082	1794	1505	1481	3454	3184	3234	1610	1792	3086	1330	1511	1509
ZJ20	1230	1330	6913	2728	1335	2974	1477	2998	1643	2968	1367	2879	1295	1401	2533	1842	1406	1563	1465	1465	1419	2936	5604	1198	1457	1689	2832	1411	1784	2962	1381	1458	1840	1303	5897	1453	2851	1818	1307	1432	3305	2995	3088	1382	1490	2832	1438	1453	1318
HUBJ8	2940	2989	6863	2261	2994	1582	3034	1571	3171	1448	2942	1438	2929	2965	3683	3073	3063	3011	3034	3034	3069	1495	5636	2939	3021	2870	1872	3063	2873	1438	3044	3042	3071	3021	5884	2850	1902	3047	3052	3001	3553	1691	1805	2998	2882	1544	3127	2918	2961
SH47	2939	2962	6818	2178	2967	1506	3050	1569	3175	1446	2949	1384	2907	2996	3660	3051	3014	3026	3036	3036	3029	1494	5615	2966	3020	2861	1710	3013	2845	1461	3002	3013	3049	2995	5852	2897	1902	3023	2990	2972	3500	1617	1859	3021	2870	1506	3083	2895	2982
SH53	2939	2962	6818	2178	2967	1506	3050	1569	3175	1446	2949	1384	2907	2996	3660	3051	3014	3026	3036	3036	3029	1494	5615	2966	3020	2861	1710	3013	2845	1461	3002	3013	3049	2995	5852	2897	1902	3023	2990	2972	3500	1617	1859	3021	2870	1506	3083	2895	2982
SH55	2939	2962	6818	2178	2967	1506	3050	1569	3175	1446	2949	1384	2907	2996	3660	3051	3014	3026	3036	3036	3029	1494	5615	2966	3020	2861	1710	3013	2845	1461	3002	3013	3049	2995	5852	2897	1902	3023	2990	2972	3500	1617	1859	3021	2870	1506	3083	2895	2982
SH59	2939	2962	6818	2178	2967	1506	3050	1569	3175	1446	2949	1384	2907	2996	3660	3051	3014	3026	3036	3036	3029	1494	5615	2966	3020	2861	1710	3013	2845	1461	3002	3013	3049	2995	5852	2897	1902	3023	2990	2972	3500	1617	1859	3021	2870	1506	3083	2895	2982
SH57	2940	2963	6819	2179	2968	1507	3051	1570	3176	1447	2950	1385	2908	2997	3661	3052	3015	3027	3037	3037	3030	1495	5616	2967	3021	2862	1711	3014	2846	1462	3003	3014	3050	2996	5853	2898	1903	3024	2991	2973	3501	1618	1860	3022	2871	1507	3084	2896	2983
CQ67	2898	2918	6867	2196	2923	1503	3031	1599	3130	1558	2933	1564	2913	2959	3679	3076	3005	3013	3034	3034	3019	1515	5659	2974	3010	2934	1783	3001	2906	1546	2992	2995	3074	2995	5888	2837	1847	3047	3048	2949	3521	1675	1826	2978	2870	1546	3069	2919	2949
FY119	2902	2922	6871	2200	2927	1507	3035	1603	3134	1562	2937	1568	2917	2963	3683	3080	3009	3017	3038	3038	3023	1519	5663	2978	3014	2938	1787	3005	2910	1550	2996	2999	3078	2999	5892	2841	1851	3051	3052	2953	3525	1679	1830	2982	2874	1550	3073	2923	2953
HUN4	2902	2922	6871	2200	2927	1507	3035	1603	3134	1562	2937	1568	2917	2963	3683	3080	3009	3017	3038	3038	3023	1519	5663	2978	3014	2938	1787	3005	2910	1550	2996	2999	3078	2999	5892	2841	1851	3051	3052	2953	3525	1679	1830	2982	2874	1550	3073	2923	2953
XD116	2902	2922	6871	2200	2927	1507	3035	1603	3134	1562	2937	1568	2917	2963	3683	3080	3009	3017	3038	3038	3023	1519	5663	2978	3014	2938	1787	3005	2910	1550	2996	2999	3078	2999	5892	2841	1851	3051	3052	2953	3525	1679	1830	2982	2874	1550	3073	2923	2953
XJ33	2899	2932	6872	2107	2937	1668	3026	1588	3104	1451	2926	1352	2855	2932	3594	3019	2958	2998	3022	3022	2993	1342	5614	2907	2993	2815	1841	2967	2866	1443	2965	2944	3015	2943	5912	2838	1907	2992	2937	2939	3520	1755	1782	2953	2864	1454	3072	2860	2910
XJ26	2900	2933	6873	2108	2938	1669	3027	1589	3105	1452	2927	1353	2856	2933	3595	3020	2959	2999	3023	3023	2994	1343	5615	2908	2994	2816	1842	2968	2867	1444	2966	2945	3016	2944	5913	2839	1908	2993	2938	2940	3521	1756	1783	2954	2865	1455	3073	2861	2911
XJ36	2900	2933	6873	2108	2938	1669	3027	1589	3105	1452	2927	1353	2856	2933	3595	3020	2959	2999	3023	3023	2994	1343	5615	2908	2994	2816	1842	2968	2867	1444	2966	2945	3016	2944	5913	2839	1908	2993	2938	2940	3521	1756	1783	2954	2865	1455	3073	2861	2911
AH29	1728	1756	6872	2861	1761	2931	1760	3025	1838	3025	1512	2965	1773	1712	2801	1375	1717	1677	1745	1745	1715	2948	5593	1710	1582	1886	3024	1713	2031	3012	1692	1708	1373	1777	5864	1727	2978	1350	1878	1873	3275	3002	3065	1743	1885	2917	1841	1582	1669
HB44	2971	3027	6876	2212	3032	1531	3097	1473	3148	1489	3019	1477	2962	3038	3715	3120	3106	3077	3093	3093	3124	1501	5671	3097	3090	2860	1969	3105	2885	1509	3097	3027	3118	3060	5896	2952	1896	3092	3082	3012	3614	1583	1832	3065	2937	1584	3152	2934	3046
HN15	2945	3012	6909	2385	3017	1922	3100	1918	3161	1828	2983	1850	2932	3015	3662	3118	3043	3092	3094	3094	3058	1896	5593	3006	3052	2908	1657	3052	2949	1834	3035	3091	3114	3003	5904	2915	1580	3091	3022	3040	3621	2013	2133	3049	2899	1832	3129	2938	3007
SC1	2952	3019	6916	2392	3024	1929	3107	1925	3168	1835	2990	1857	2939	3022	3669	3125	3050	3099	3101	3101	3065	1903	5600	3013	3059	2915	1664	3059	2956	1841	3042	3098	3121	3010	5911	2922	1587	3098	3029	3047	3628	2020	2140	3056	2908	1839	3136	2945	3014
HUBJ25	3527	3444	6917	3572	3449	3575	3494	3663	3597	3687	3418	3682	3348	3509	3995	3538	3467	3465	3493	3493	3513	3652	5723	3409	3447	3409	3654	3463	3410	3695	3462	3485	3536	3422	6006	3478	3745	3512	3455	3448	1530	3618	3849	3540	3448	3600	3535	3431	3503
HUBJ30	3527	3444	6917	3572	3449	3575	3494	3663	3597	3687	3418	3682	3348	3509	3995	3538	3467	3465	3493	3493	3513	3652	5723	3409	3447	3409	3654	3463	3410	3695	3462	3485	3536	3422	6006	3478	3745	3512	3455	3448	1530	3618	3849	3540	3448	3600	3535	3431	3503
HUN111	3527	3444	6917	3572	3449	3575	3494	3663	3597	3687	3418	3682	3348	3509	3995	3538	3467	3465	3493	3493	3513	3652	5723	3409	3447	3409	3654	3463	3410	3695	3462	3485	3536	3422	6006	3478	3745	3512	3455	3448	1530	3618	3849	3540	3448	3600	3535	3431	3503
HUN24	2967	3002	6926	2198	3007	1623	3087	1651	3144	1648	2997	1660	2931	3062	3730	3041	3009	3122	3083	3083	3022	1614	5685	3008	3073	2844	1911	3008	2890	1660	2995	3012	3039	3014	5915	2938	2098	3014	3026	2988	3512	1543	1890	3068	2841	1673	3075	2902	3032
JX23	3535	3452	6925	3580	3457	3583	3502	3671	3605	3696	3426	3690	3356	3517	4003	3546	3475	3473	3501	3501	3521	3660	5731	3417	3455	3417	3662	3471	3418	3704	3470	3493	3544	3430	6014	3486	3753	3520	3463	3456	1538	3626	3858	3548	3456	3608	3543	3439	3511
JX25	2966	3058	6958	2200	3063	1700	3160	1795	3236	1770	3067	1697	2978	3119	3811	3211	3101	3180	3154	3154	3107	1699	5781	3084	3163	2912	1923	3100	2894	1777	3082	3100	3209	3046	5944	3029	2132	3186	3103	3018	3669	1550	2067	3148	2868	1761	3136	3007	3093
TJ50	3104	3173	6927	2455	3178	1885	3293	1922	3389	1817	3199	1866	3154	3267	3639	3315	3221	3257	3295	3295	3215	1896	5631	3188	3235	3177	1846	3223	3119	1821	3192	3251	3311	3204	5895	3211	1964	3289	3280	3148	3741	1984	2150	3295	3084	1966	3289	3146	3262
XJ39	3104	3173	6927	2455	3178	1885	3293	1922	3389	1817	3199	1866	3154	3267	3639	3315	3221	3257	3295	3295	3215	1896	5631	3188	3235	3177	1846	3223	3119	1821	3192	3251	3311	3204	5895	3211	1964	3289	3280	3148	3741	1984	2150	3295	3084	1966	3289	3146	3262
XJ50	3104	3173	6927	2455	3178	1885	3293	1922	3389	1817	3199	1866	3154	3267	3639	3315	3221	3257	3295	3295	3215	1896	5631	3188	3235	3177	1846	3223	3119	1821	3192	3251	3311	3204	5895	3211	1964	3289	3280	3148	3741	1984	2150	3295	3084	1966	3289	3146	3262
AH24	3016	3092	6959	2264	3097	1741	3170	1787	3248	1644	3078	1768	3037	3142	3773	3167	3095	3213	3166	3166	3110	1701	5749	3109	3156	2955	2064	3096	2988	1653	3083	3102	3165	3113	5970	3018	2165	3140	3141	3083	3637	1687	1985	3146	2967	1796	3163	2985	3099
AH41	3016	3092	6959	2264	3097	1741	3170	1787	3248	1644	3078	1768	3037	3142	3773	3167	3095	3213	3166	3166	3110	1701	5749	3109	3156	2955	2064	3096	2988	1653	3083	3102	3165	3113	5970	3018	2165	3140	3141	3083	3637	1687	1985	3146	2967	1796	3163	2985	3099
HLJ34	3032	3108	6981	2284	3113	1757	3186	1805	3264	1662	3094	1784	3053	3158	3789	3183	3113	3229	3182	3182	3126	1719	5769	3125	3172	2971	2080	3112	3004	1669	3099	3118	3181	3129	5988	3034	2181	3156	3157	3099	3653	1703	2003	3162	2983	1814	3177	3001	3115
YN17	3033	3109	6978	2285	3114	1758	3187	1806	3265	1663	3095	1785	3054	3159	3790	3184	3114	3230	3183	3183	3127	1720	5768	3126	3173	2972	2081	3113	3005	1670	3100	3119	3182	3130	5989	3035	2182	3157	3158	3100	3654	1704	2002	3163	2984	1815	3178	3002	3116
YN19	3033	3109	6978	2285	3114	1758	3187	1806	3265	1663	3095	1785	3054	3159	3790	3184	3114	3230	3183	3183	3127	1720	5768	3126	3173	2972	2081	3113	3005	1670	3100	3119	3182	3130	5989	3035	2182	3157	3158	3100	3654	1704	2002	3163	2984	1815	3178	3002	3116
YN20	3033	3109	6978	2285	3114	1758	3187	1806	3265	1663	3095	1785	3054	3159	3790	3184	3114	3230	3183	3183	3127	1720	5768	3126	3173	2972	2081	3113	3005	1670	3100	3119	3182	3130	5989	3035	2182	3157	3158	3100	3654	1704	2002	3163	2984	1815	3178	3002	3116
YN22	3033	3109	6978	2285	3114	1758	3187	1806	3265	1663	3095	1785	3054	3159	3790	3184	3114	3230	3183	3183	3127	1720	5768	3126	3173	2972	2081	3113	3005	1670	3100	3119	3182	3130	5989	3035	2182	3157	3158	3100	3654	1704	2002	3163	2984	1815	3178	3002	3116
GS6	3463	3398	6940	3542	3403	3601	3266	3659	3490	3672	3324	3664	3300	3383	4052	3452	3420	3470	3263	3263	3462	3674	5787	3401	3396	3323	3656	3422	3355	3685	3429	3477	3450	3371	6032	3369	3700	3426	3413	3281	1647	3581	3812	3415	3383	3538	3434	3398	3409
FY251	2933	2964	7009	2267	2969	1819	3071	1715	3212	1696	2956	1835	2903	2995	3660	3092	3025	3022	3065	3065	3037	1687	5701	2969	3043	2872	2213	3029	2902	1695	3012	3061	3090	3008	5985	2914	2240	3067	2999	3003	3592	1808	1876	3024	2879	1711	3116	2914	3008
HB6	2933	2964	7009	2267	2969	1819	3071	1715	3212	1696	2956	1835	2903	2995	3660	3092	3025	3022	3065	3065	3037	1687	5701	2969	3043	2872	2213	3029	2902	1695	3012	3061	3090	3008	5985	2914	2240	3067	2999	3003	3592	1808	1876	3024	2879	1711	3116	2914	3008
S199	2937	2968	7013	2271	2973	1823	3075	1719	3216	1700	2960	1839	2907	2999	3664	3096	3029	3026	3069	3069	3041	1691	5705	2973	3047	2876	2217	3033	2906	1699	3016	3065	3094	3012	5989	2918	2244	3071	3003	3007	3596	1812	1880	3028	2883	1715	3120	2918	3012
HUBS37	5651	5666	6084	5676	5671	5527	5682	5589	5747	5568	5598	5552	5622	5682	5413	5612	5629	5570	5677	5677	5657	5618	5345	5636	5648	5678	5680	5632	5674	5577	5632	5660	5610	5656	3567	5667	5596	5590	5611	5658	5767	5554	5663	5703	5631	5528	5735	5610	5673
HUBS36	5652	5667	6085	5677	5672	5528	5683	5590	5748	5569	5599	5553	5623	5683	5414	5613	5630	5571	5678	5678	5658	5619	5346	5637	5649	5679	5681	5633	5675	5578	5633	5661	5611	5657	3568	5668	5597	5591	5612	5659	5768	5555	5664	5704	5632	5529	5736	5611	5674
HUBS24	2875	2917	7014	2450	2922	2157	2957	2231	3062	2105	2861	2174	2897	2927	3709	3043	2994	2978	2939	2939	3012	2080	5759	2964	2961	2821	2389	2998	2899	2083	2985	2982	3041	2900	5955	2868	2472	3018	2903	2974	3565	1971	2302	2962	2818	2135	3037	2838	2935
HUNS33	2875	2917	7014	2450	2922	2157	2957	2231	3062	2105	2861	2174	2897	2927	3709	3043	2994	2978	2939	2939	3012	2080	5759	2964	2961	2821	2389	2998	2899	2083	2985	2982	3041	2900	5955	2868	2472	3018	2903	2974	3565	1971	2302	2962	2818	2135	3037	2838	2935
CQ74	2897	2951	7021	2545	2956	2281	3052	2362	3035	2227	2924	2414	2925	3000	3805	3045	3019	3046	3038	3038	3036	2258	5649	2948	3024	2872	2449	3019	2951	2222	2997	3015	3043	2992	5964	2968	2614	3015	3016	3014	3592	2249	2429	3025	2871	2277	3069	2916	2990
S88	3021	3034	7091	2525	3039	2282	3127	2335	3204	2252	3003	2320	2957	3107	3772	3175	3097	3079	3113	3113	3118	2251	5822	3051	3063	2881	2585	3099	2948	2236	3089	3089	3173	3040	6004	3038	2647	3147	3045	3039	3602	2229	2394	3126	2899	2218	3153	3014	3104
S98	3021	3034	7091	2525	3039	2282	3127	2335	3204	2252	3003	2320	2957	3107	3772	3175	3097	3079	3113	3113	3118	2251	5822	3051	3063	2881	2585	3099	2948	2236	3089	3089	3173	3040	6004	3038	2647	3147	3045	3039	3602	2229	2394	3126	2899	2218	3153	3014	3104
XD86	3021	3034	7091	2525	3039	2282	3127	2335	3204	2252	3003	2320	2957	3107	3772	3175	3097	3079	3113	3113	3118	2251	5822	3051	3063	2881	2585	3099	2948	2236	3089	3089	3173	3040	6004	3038	2647	3147	3045	3039	3602	2229	2394	3126	2899	2218	3153	3014	3104
S87	3022	3035	7092	2526	3040	2283	3128	2336	3205	2253	3004	2321	2958	3108	3773	3176	3098	3080	3114	3114	3119	2252	5823	3052	3064	2882	2586	3100	2949	2237	3090	3090	3174	3041	6005	3039	2648	3148	3046	3040	3603	2230	2395	3127	2900	2219	3154	3015	3105
JX12	3024	3037	7094	2528	3042	2285	3132	2338	3207	2257	3008	2323	2960	3110	3775	3178	3100	3084	3118	3118	3121	2254	5827	3054	3068	2884	2588	3102	2951	2241	3092	3092	3176	3043	6009	3041	2652	3150	3048	3042	3607	2232	2399	3129	2902	2223	3156	3017	3107
SAX35	3908	3911	6746	3970	3916	4000	3837	4000	4042	4103	3885	4055	3901	3942	4429	3954	3868	3933	3841	3841	3883	4119	5679	3883	3910	3894	3959	3873	3854	4084	3860	3900	3950	3815	5883	3896	4062	3928	3900	3716	4184	4114	4215	3971	3883	4020	3857	3912	3942
HUN11	3919	3922	6908	4014	3927	4027	3826	4033	4025	4123	3847	4049	3807	3922	4430	4001	3827	3904	3828	3828	3862	4099	5804	3838	3868	3944	4022	3826	3945	4118	3833	3898	3999	3751	5957	3889	4107	3979	3835	3749	4144	4190	4193	3941	3913	4033	3850	3866	3923
HUN59	3919	3922	6908	4014	3927	4027	3826	4033	4025	4123	3847	4049	3807	3922	4430	4001	3827	3904	3828	3828	3862	4099	5804	3838	3868	3944	4022	3826	3945	4118	3833	3898	3999	3751	5957	3889	4107	3979	3835	3749	4144	4190	4193	3941	3913	4033	3850	3866	3923
HUN58	3920	3923	6909	4015	3928	4028	3827	4034	4026	4124	3848	4050	3808	3923	4431	4002	3828	3905	3829	3829	3863	4100	5805	3839	3869	3945	4023	3827	3946	4119	3834	3899	4000	3752	5958	3890	4108	3980	3836	3750	4145	4191	4194	3942	3914	4034	3851	3867	3924
S51	3973	3921	6754	4057	3926	4060	3838	4041	4021	4102	3914	4075	3932	3980	4461	3916	3846	3942	3840	3840	3868	4084	5640	3884	3911	3913	4027	3858	3876	4084	3839	3927	3912	3842	5818	3953	4093	3892	3923	3716	4227	4199	4250	4005	3882	4015	3815	3974	3983
S72	3989	3946	6768	4085	3951	4116	3859	4096	4042	4158	3935	4123	3959	4003	4475	3949	3871	3963	3861	3861	3893	4142	5641	3907	3932	3929	4091	3879	3884	4141	3860	3952	3947	3873	5827	3981	4150	3923	3956	3747	4244	4240	4280	4026	3896	4073	3836	3994	4006
S78	3989	3946	6768	4085	3951	4116	3859	4096	4042	4158	3935	4123	3959	4003	4475	3949	3871	3963	3861	3861	3893	4142	5641	3907	3932	3929	4091	3879	3884	4141	3860	3952	3947	3873	5827	3981	4150	3923	3956	3747	4244	4240	4280	4026	3896	4073	3836	3994	4006
S193	3994	3951	6773	4090	3956	4121	3864	4101	4047	4163	3940	4128	3964	4008	4480	3954	3876	3968	3866	3866	3898	4147	5646	3912	3935	3934	4096	3884	3889	4146	3865	3957	3952	3878	5832	3986	4155	3928	3961	3752	4249	4245	4285	4031	3899	4078	3839	3998	4011
SD58	4019	3952	6898	4100	3957	4095	3925	4048	4082	4185	3974	4089	3975	3994	4432	4099	3962	3987	3925	3925	3984	4159	5766	4018	3989	4062	4086	3970	4034	4174	3958	3993	4097	3934	5958	3979	4142	4073	3972	3833	4253	4206	4255	4022	3995	4118	3974	3981	4000
SAX40	5586	5578	6702	5571	5583	5513	5567	5504	5598	5503	5563	5466	5547	5586	4979	5666	5561	5504	5564	5564	5586	5602	3645	5587	5598	5575	5594	5565	5604	5522	5557	5523	5664	5589	5212	5573	5567	5640	5573	5559	5577	5572	5577	5623	5581	5522	5591	5537	5587
S52	5476	5432	6709	5546	5437	5445	5447	5474	5421	5493	5447	5492	5480	5481	3998	5502	5459	5527	5445	5445	5474	5549	3727	5457	5473	5514	5537	5472	5535	5500	5454	5418	5498	5489	5112	5479	5549	5480	5464	5456	5588	5516	5593	5515	5488	5508	5482	5465	5485
FY240	5788	5731	6787	5782	5736	5702	5698	5730	5716	5701	5721	5688	5736	5752	5275	5750	5760	5716	5698	5698	5793	5745	4092	5714	5762	5698	5808	5771	5676	5707	5767	5709	5748	5774	5447	5731	5746	5728	5711	5715	5818	5740	5804	5789	5688	5689	5770	5762	5766
GZ89	15106	15094	15460	15238	15099	15176	15135	15201	15042	15177	15104	15188	15135	15118	15060	15139	15112	15096	15140	15140	15117	15208	14871	15139	15123	15122	15191	15114	15132	15173	15091	15076	15139	15161	14748	15108	15189	15127	15118	15117	15197	15206	15152	15126	15130	15143	15101	15113	15102
[truncated: 239 more columns]
