# Supplementary material for: Antimicrobial resistance and population genomics of extensively drug resistant Escherichia coli in pig farms in mainland China: a national wide epidemiological and microbiological study
Source: Research Square preprint supplement (doi:10.21203/rs.3.rs-502741/v1), 2021-05-14
Supplement: Supplementary file 3 [file 722e420d0631be251461cdbb.xlsx]

## Sheet: Sheet1
Resistance gene	Strain	Contigs where predicted resistance genes located	Position in contig	Phenotype
aac(3)-IIa	QH8	NODE_101_length_1694_cov_110.039579	117..977	Aminoglycoside resistance
aac(3)-IIa	HUBJ20	NODE_101_length_2753_cov_104.309791	1773..2633	Aminoglycoside resistance
aac(3)-IIa	HUBJ16	NODE_102_length_2753_cov_125.247758	121..981	Aminoglycoside resistance
aac(3)-IIa	CQ7	NODE_151_length_868_cov_99.121365	342..868	Aminoglycoside resistance
aac(3)-IIa	FY248	NODE_154_length_881_cov_46.579602	78..771	Aminoglycoside resistance
aac(3)-IIa	SD15	NODE_34_length_2751_cov_120.721765	1772..2632	Aminoglycoside resistance
aac(3)-IIa	AH36	NODE_43_length_2752_cov_101.940187	1772..2632	Aminoglycoside resistance
aac(3)-IIa	AH12	NODE_45_length_2754_cov_96.852073	1774..2634	Aminoglycoside resistance
aac(3)-IIa	GS208	NODE_53_length_2751_cov_121.119671	1771..2631	Aminoglycoside resistance
aac(3)-IIa	JX26	NODE_62_length_2086_cov_68.835739	121..981	Aminoglycoside resistance
aac(3)-IIa	AH48	NODE_63_length_1610_cov_89.195042	736..1535	Aminoglycoside resistance
aac(3)-IIa	CQ29	NODE_64_length_2750_cov_176.129817	1771..2631	Aminoglycoside resistance
aac(3)-IIa	CQ32	NODE_65_length_2751_cov_176.360509	1772..2632	Aminoglycoside resistance
aac(3)-IIa	CQ21	NODE_67_length_2752_cov_112.387290	120..980	Aminoglycoside resistance
aac(3)-IIa	CQ33	NODE_67_length_2752_cov_112.734579	120..980	Aminoglycoside resistance
aac(3)-IIa	CQ25	NODE_68_length_2751_cov_95.593867	1772..2632	Aminoglycoside resistance
aac(3)-IIa	CQ26	NODE_68_length_2752_cov_119.534579	120..980	Aminoglycoside resistance
aac(3)-IIa	CQ28	NODE_70_length_2750_cov_70.014216	1771..2631	Aminoglycoside resistance
aac(3)-IIa	QH7	NODE_71_length_1540_cov_145.297464	40..900	Aminoglycoside resistance
aac(3)-IIa	CQ30	NODE_72_length_2751_cov_94.522438	1772..2632	Aminoglycoside resistance
aac(3)-IIa	CQ34	NODE_72_length_2752_cov_87.380935	120..980	Aminoglycoside resistance
aac(3)-IIa	QH2	NODE_73_length_1540_cov_138.850340	40..900	Aminoglycoside resistance
aac(3)-IIa	CQ35	NODE_73_length_2752_cov_80.749159	120..980	Aminoglycoside resistance
aac(3)-IIa	CQ22	NODE_73_length_2752_cov_94.247103	120..980	Aminoglycoside resistance
aac(3)-IIa	LN43	NODE_74_length_2751_cov_93.246821	120..980	Aminoglycoside resistance
aac(3)-IIa	GZ12	NODE_74_length_2754_cov_93.278670	1774..2634	Aminoglycoside resistance
aac(3)-IIa	GS191	NODE_76_length_2080_cov_86.607589	117..977	Aminoglycoside resistance
aac(3)-IIa	QH10	NODE_82_length_1694_cov_143.432900	718..1578	Aminoglycoside resistance
aac(3)-IIa	QH6	NODE_83_length_1694_cov_143.808287	117..977	Aminoglycoside resistance
aac(3)-IIa	CQ92	NODE_89_length_2753_cov_60.225710	121..981	Aminoglycoside resistance
aac(3)-IIa	QH9	NODE_95_length_1694_cov_123.236858	117..977	Aminoglycoside resistance
aac(3)-IIa	S201	NODE_99_length_1540_cov_198.242424	641..1501	Aminoglycoside resistance
aac(3)-IIa	JX40	NODE_99_length_2077_cov_174.948500	117..977	Aminoglycoside resistance
aac(3)-IIa	LN42	NODE_99_length_2752_cov_107.743551	120..980	Aminoglycoside resistance
aac(3)-IIa	HUBJ24	NODE_99_length_2752_cov_108.149907	1772..2632	Aminoglycoside resistance
aac(3)-IId	XD97	E_coli_RXD97_ctg0064 Escherichia coli ATCC 25922	1233..2093	Aminoglycoside resistance
aac(3)-IId	CQ8	NODE_100_length_2871_cov_75.543665	1104..1964	Aminoglycoside resistance
aac(3)-IId	NMG48	NODE_100_length_3908_cov_96.581310	2707..3567	Aminoglycoside resistance
aac(3)-IId	HB37	NODE_101_length_2677_cov_76.376923	1103..1963	Aminoglycoside resistance
aac(3)-IId	S211	NODE_101_length_3677_cov_148.533056	113..973	Aminoglycoside resistance
aac(3)-IId	SD23	NODE_101_length_3785_cov_69.545577	2706..3566	Aminoglycoside resistance
aac(3)-IId	JX39	NODE_102_length_1589_cov_80.414021	192..1052	Aminoglycoside resistance
aac(3)-IId	AH13	NODE_103_length_3676_cov_109.664073	111..970	Aminoglycoside resistance
aac(3)-IId	NMG7	NODE_103_length_3677_cov_78.121944	2707..3567	Aminoglycoside resistance
aac(3)-IId	HUN11	NODE_103_length_3679_cov_99.417823	2707..3567	Aminoglycoside resistance
aac(3)-IId	HUN58	NODE_103_length_4101_cov_104.335487	2707..3567	Aminoglycoside resistance
aac(3)-IId	AH19	NODE_103_length_5108_cov_117.848738	4123..4983	Aminoglycoside resistance
aac(3)-IId	GS86	NODE_104_length_3908_cov_95.679718	342..1202	Aminoglycoside resistance
aac(3)-IId	GS85	NODE_104_length_3908_cov_95.679718	342..1202	Aminoglycoside resistance
aac(3)-IId	FY219	NODE_105_length_1690_cov_130.087415	111..971	Aminoglycoside resistance
aac(3)-IId	SD12	NODE_105_length_3765_cov_126.409422	278..1138	Aminoglycoside resistance
aac(3)-IId	S56	NODE_106_length_2527_cov_253.425306	639..1499	Aminoglycoside resistance
aac(3)-IId	S73	NODE_106_length_917_cov_2.133333	250..917	Aminoglycoside resistance
aac(3)-IId	HB29	NODE_108_length_2676_cov_75.396691	1103..1963	Aminoglycoside resistance
aac(3)-IId	GS84	NODE_110_length_4509_cov_119.842960	942..1802	Aminoglycoside resistance
aac(3)-IId	HUN7	NODE_111_length_3679_cov_144.549972	2707..3567	Aminoglycoside resistance
aac(3)-IId	NMG49	NODE_116_length_2661_cov_108.101780	699..1559	Aminoglycoside resistance
aac(3)-IId	HUBJ22	NODE_119_length_4302_cov_103.898462	736..1596	Aminoglycoside resistance
aac(3)-IId	NMG50	NODE_121_length_2661_cov_88.738003	699..1559	Aminoglycoside resistance
aac(3)-IId	QH5	NODE_121_length_2679_cov_89.582244	715..1575	Aminoglycoside resistance
aac(3)-IId	FY251	NODE_121_length_4687_cov_105.925813	2707..3567	Aminoglycoside resistance
aac(3)-IId	QH12	NODE_122_length_2679_cov_85.088009	715..1575	Aminoglycoside resistance
aac(3)-IId	NMG46	NODE_122_length_3786_cov_79.904556	220..1080	Aminoglycoside resistance
aac(3)-IId	QH4	NODE_124_length_2679_cov_74.900461	715..1575	Aminoglycoside resistance
aac(3)-IId	JX18	NODE_124_length_3907_cov_107.948825	341..1201	Aminoglycoside resistance
aac(3)-IId	HUN84	NODE_129_length_2006_cov_221.320373	445..1305	Aminoglycoside resistance
aac(3)-IId	CQ16	NODE_129_length_2659_cov_119.033695	1085..1945	Aminoglycoside resistance
aac(3)-IId	CQ1	NODE_129_length_2660_cov_151.142470	715..1575	Aminoglycoside resistance
aac(3)-IId	GS99	NODE_130_length_2665_cov_329.910742	1770..2630	Aminoglycoside resistance
aac(3)-IId	GS105	NODE_130_length_2665_cov_340.818393	36..896	Aminoglycoside resistance
aac(3)-IId	CQ14	NODE_132_length_2660_cov_110.640728	715..1575	Aminoglycoside resistance
aac(3)-IId	NMG47	NODE_133_length_2661_cov_80.607198	699..1559	Aminoglycoside resistance
aac(3)-IId	CQ77	NODE_142_length_3677_cov_98.880556	2707..3567	Aminoglycoside resistance
aac(3)-IId	HUN75	NODE_142_length_3679_cov_118.634092	113..973	Aminoglycoside resistance
aac(3)-IId	FY237	NODE_145_length_2678_cov_105.137639	1105..1965	Aminoglycoside resistance
aac(3)-IId	SAX35	NODE_33_length_8544_cov_142.156490	7505..8365	Aminoglycoside resistance
aac(3)-IId	SH59	NODE_36_length_7936_cov_153.717140	5203..6063	Aminoglycoside resistance
aac(3)-IId	SH22	NODE_37_length_8877_cov_125.531932	6539..7399	Aminoglycoside resistance
aac(3)-IId	NMG5	NODE_38_length_3907_cov_73.556136	341..1201	Aminoglycoside resistance
aac(3)-IId	SH53	NODE_38_length_7936_cov_151.251813	5203..6063	Aminoglycoside resistance
aac(3)-IId	SC1	NODE_38_length_8584_cov_241.752557	1185..2045	Aminoglycoside resistance
aac(3)-IId	HB24	NODE_39_length_13198_cov_40.602241	12227..13087	Aminoglycoside resistance
aac(3)-IId	NMG8	NODE_39_length_3907_cov_81.295822	341..1201	Aminoglycoside resistance
aac(3)-IId	SH47	NODE_39_length_7936_cov_111.373712	5203..6063	Aminoglycoside resistance
aac(3)-IId	SH55	NODE_39_length_7936_cov_133.001781	1874..2734	Aminoglycoside resistance
aac(3)-IId	NMG3	NODE_40_length_3907_cov_71.614360	341..1201	Aminoglycoside resistance
aac(3)-IId	SH57	NODE_40_length_7935_cov_116.052049	1874..2734	Aminoglycoside resistance
aac(3)-IId	NMG9	NODE_42_length_3907_cov_110.521410	2707..3567	Aminoglycoside resistance
aac(3)-IId	NMG10	NODE_44_length_6140_cov_114.046841	5169..6029	Aminoglycoside resistance
aac(3)-IId	XJ39	NODE_45_length_2569_cov_96.162520	537..1397	Aminoglycoside resistance
aac(3)-IId	GZ86	NODE_46_length_2645_cov_99.297118	601..1461	Aminoglycoside resistance
aac(3)-IId	HUN26	NODE_47_length_11197_cov_124.808363	131..991	Aminoglycoside resistance
aac(3)-IId	S51	NODE_47_length_4027_cov_65.035443	2285..3145	Aminoglycoside resistance
aac(3)-IId	HUN19	NODE_49_length_3724_cov_106.086372	2705..3565	Aminoglycoside resistance
aac(3)-IId	GS35	NODE_51_length_2764_cov_82.344250	1191..2051	Aminoglycoside resistance
aac(3)-IId	HUN101	NODE_51_length_4686_cov_74.375136	2705..3565	Aminoglycoside resistance
aac(3)-IId	XJ26	NODE_52_length_1924_cov_288.712507	36..896	Aminoglycoside resistance
aac(3)-IId	CQ31	NODE_52_length_2665_cov_219.819165	1770..2630	Aminoglycoside resistance
aac(3)-IId	HUBS36	NODE_52_length_5757_cov_73.342430	2192..3052	Aminoglycoside resistance
aac(3)-IId	XJ40	NODE_52_length_5827_cov_66.320348	4857..5717	Aminoglycoside resistance
aac(3)-IId	XJ36	NODE_53_length_1924_cov_226.852193	36..896	Aminoglycoside resistance
aac(3)-IId	GS34	NODE_53_length_2679_cov_60.721752	1106..1966	Aminoglycoside resistance
aac(3)-IId	SH52	NODE_53_length_4719_cov_83.869237	1986..2846	Aminoglycoside resistance
aac(3)-IId	XJ33	NODE_54_length_1924_cov_205.199242	1029..1889	Aminoglycoside resistance
aac(3)-IId	QH13	NODE_54_length_4471_cov_79.920574	907..1767	Aminoglycoside resistance
aac(3)-IId	GS207	NODE_54_length_8518_cov_117.238005	6538..7398	Aminoglycoside resistance
aac(3)-IId	JX38	NODE_55_length_2873_cov_58.531474	1106..1966	Aminoglycoside resistance
aac(3)-IId	LN36	NODE_55_length_3908_cov_77.154529	342..1202	Aminoglycoside resistance
aac(3)-IId	HUBS37	NODE_55_length_4100_cov_221.806861	2703..3563	Aminoglycoside resistance
aac(3)-IId	AH28	NODE_55_length_5827_cov_106.301043	4857..5717	Aminoglycoside resistance
aac(3)-IId	BJ25	NODE_55_length_8520_cov_80.971219	1121..1981	Aminoglycoside resistance
aac(3)-IId	GS33	NODE_56_length_2679_cov_115.392390	714..1574	Aminoglycoside resistance
aac(3)-IId	HUN94	NODE_56_length_3680_cov_187.273938	113..973	Aminoglycoside resistance
aac(3)-IId	SH56	NODE_58_length_4719_cov_90.487936	1986..2846	Aminoglycoside resistance
aac(3)-IId	CQ15	NODE_59_length_2872_cov_59.830769	1105..1965	Aminoglycoside resistance
aac(3)-IId	NMG29	NODE_59_length_3907_cov_101.695300	2707..3567	Aminoglycoside resistance
aac(3)-IId	HUBS5	NODE_59_length_4158_cov_77.668709	1106..1966	Aminoglycoside resistance
aac(3)-IId	HUN80	NODE_59_length_6416_cov_139.478151	112..972	Aminoglycoside resistance
aac(3)-IId	SH50	NODE_59_length_7936_cov_103.035628	1874..2734	Aminoglycoside resistance
aac(3)-IId	HUNS46	NODE_60_length_13289_cov_84.927112	12183..13043	Aminoglycoside resistance
aac(3)-IId	CQ17	NODE_60_length_2872_cov_63.737388	1105..1965	Aminoglycoside resistance
aac(3)-IId	SD10	NODE_60_length_2872_cov_95.489088	907..1767	Aminoglycoside resistance
aac(3)-IId	SH46	NODE_61_length_7936_cov_142.438096	1874..2734	Aminoglycoside resistance
aac(3)-IId	S52	NODE_62_length_8883_cov_165.919260	6540..7400	Aminoglycoside resistance
aac(3)-IId	JX23	NODE_63_length_2679_cov_69.454650	1105..1965	Aminoglycoside resistance
aac(3)-IId	NMG25	NODE_63_length_4473_cov_83.970883	907..1767	Aminoglycoside resistance
aac(3)-IId	SD37	NODE_63_length_4686_cov_160.152094	1119..1979	Aminoglycoside resistance
aac(3)-IId	HUN115	NODE_64_length_4447_cov_222.214188	2705..3565	Aminoglycoside resistance
aac(3)-IId	S95	NODE_64_length_5543_cov_142.281376	2705..3565	Aminoglycoside resistance
aac(3)-IId	HUBS21	NODE_64_length_5907_cov_137.108748	4936..5796	Aminoglycoside resistance
aac(3)-IId	GZ55	NODE_66_length_3765_cov_103.730869	2628..3488	Aminoglycoside resistance
aac(3)-IId	XD26	NODE_66_length_3919_cov_129.074440	2705..3565	Aminoglycoside resistance
aac(3)-IId	XJ35	NODE_66_length_5827_cov_127.734087	111..971	Aminoglycoside resistance
aac(3)-IId	SD40	NODE_67_length_15153_cov_146.611303	12183..13043	Aminoglycoside resistance
aac(3)-IId	SAX32	NODE_67_length_3084_cov_89.367808	1103..1963	Aminoglycoside resistance
aac(3)-IId	HUBJ30	NODE_67_length_4301_cov_131.775331	2706..3566	Aminoglycoside resistance
aac(3)-IId	S89	NODE_67_length_5543_cov_158.393707	1979..2839	Aminoglycoside resistance
aac(3)-IId	FY48	NODE_67_length_9418_cov_94.904507	5852..6712	Aminoglycoside resistance
aac(3)-IId	HUNS48	NODE_68_length_1373_cov_49.668981	402..1262	Aminoglycoside resistance
aac(3)-IId	CQ20	NODE_68_length_2678_cov_61.100730	715..1575	Aminoglycoside resistance
aac(3)-IId	S103	NODE_68_length_2871_cov_103.764853	1104..1964	Aminoglycoside resistance
aac(3)-IId	XD25	NODE_68_length_3919_cov_157.283186	355..1215	Aminoglycoside resistance
aac(3)-IId	AH37	NODE_68_length_5211_cov_133.843787	1980..2840	Aminoglycoside resistance
aac(3)-IId	YN33	NODE_69_length_2184_cov_60.235406	220..1080	Aminoglycoside resistance
aac(3)-IId	CQ9	NODE_69_length_2678_cov_87.061899	1104..1964	Aminoglycoside resistance
aac(3)-IId	HUN92	NODE_69_length_2699_cov_50.206712	1105..1965	Aminoglycoside resistance
aac(3)-IId	FY230	NODE_69_length_3907_cov_104.382507	341..1201	Aminoglycoside resistance
aac(3)-IId	HUBJ25	NODE_69_length_4301_cov_135.469697	736..1596	Aminoglycoside resistance
aac(3)-IId	JS77	NODE_70_length_2906_cov_91.673736	1103..1963	Aminoglycoside resistance
aac(3)-IId	FY268	NODE_70_length_6304_cov_248.839891	5335..6195	Aminoglycoside resistance
aac(3)-IId	CQ4	NODE_71_length_2678_cov_66.818147	1104..1964	Aminoglycoside resistance
aac(3)-IId	QH3	NODE_71_length_2680_cov_81.093354	715..1575	Aminoglycoside resistance
aac(3)-IId	GS82	NODE_71_length_3710_cov_202.410680	219..1079	Aminoglycoside resistance
aac(3)-IId	S75	NODE_72_length_4236_cov_160.519836	2705..3565	Aminoglycoside resistance
aac(3)-IId	AH40	NODE_72_length_5379_cov_149.138816	1980..2840	Aminoglycoside resistance
aac(3)-IId	GD40	NODE_72_length_8517_cov_82.514929	6539..7399	Aminoglycoside resistance
aac(3)-IId	AH4	NODE_74_length_5587_cov_181.726134	2540..3400	Aminoglycoside resistance
aac(3)-IId	FY183	NODE_74_length_5828_cov_101.577117	112..972	Aminoglycoside resistance
aac(3)-IId	HUNS32	NODE_74_length_6167_cov_75.593596	4123..4983	Aminoglycoside resistance
aac(3)-IId	XD39	NODE_75_length_2076_cov_56.769885	1106..1966	Aminoglycoside resistance
aac(3)-IId	HUN129	NODE_75_length_2076_cov_79.331166	111..971	Aminoglycoside resistance
aac(3)-IId	GS100	NODE_75_length_5952_cov_57.705532	4857..5717	Aminoglycoside resistance
aac(3)-IId	FY253	NODE_75_length_6304_cov_250.857074	5335..6195	Aminoglycoside resistance
aac(3)-IId	SH51	NODE_75_length_7937_cov_114.334224	5204..6064	Aminoglycoside resistance
aac(3)-IId	SAX22	NODE_76_length_3512_cov_246.042213	2540..3400	Aminoglycoside resistance
aac(3)-IId	HUN111	NODE_76_length_4301_cov_153.466856	2706..3566	Aminoglycoside resistance
aac(3)-IId	SD28	NODE_77_length_2414_cov_118.241335	373..1233	Aminoglycoside resistance
aac(3)-IId	XJ12	NODE_77_length_3679_cov_108.324542	113..973	Aminoglycoside resistance
aac(3)-IId	QH18	NODE_78_length_2185_cov_96.059298	220..1080	Aminoglycoside resistance
aac(3)-IId	SC4	NODE_78_length_2678_cov_97.911957	1104..1964	Aminoglycoside resistance
aac(3)-IId	XJ4	NODE_78_length_4011_cov_98.216065	445..1305	Aminoglycoside resistance
aac(3)-IId	CQ80	NODE_78_length_5378_cov_129.086399	2540..3400	Aminoglycoside resistance
aac(3)-IId	XD34	NODE_79_length_2076_cov_101.129565	111..971	Aminoglycoside resistance
aac(3)-IId	HUN71	NODE_79_length_2076_cov_58.698349	1106..1966	Aminoglycoside resistance
aac(3)-IId	XD40	NODE_79_length_2076_cov_89.097549	111..971	Aminoglycoside resistance
aac(3)-IId	GS86	NODE_79_length_9418_cov_126.564608	5852..6712	Aminoglycoside resistance
aac(3)-IId	SD11	NODE_80_length_3141_cov_131.104112	192..1052	Aminoglycoside resistance
aac(3)-IId	HUNS33	NODE_80_length_6139_cov_105.859617	5169..6029	Aminoglycoside resistance
aac(3)-IId	SAX6	NODE_80_length_7027_cov_77.051511	246..1106	Aminoglycoside resistance
aac(3)-IId	QH1	NODE_81_length_2074_cov_83.992489	1105..1965	Aminoglycoside resistance
aac(3)-IId	HUN108	NODE_81_length_2075_cov_219.027027	111..971	Aminoglycoside resistance
aac(3)-IId	CQ2	NODE_81_length_3906_cov_91.491512	2707..3567	Aminoglycoside resistance
aac(3)-IId	CQ59	NODE_81_length_4104_cov_97.328036	538..1398	Aminoglycoside resistance
aac(3)-IId	HB38	NODE_81_length_4813_cov_109.730363	1247..2107	Aminoglycoside resistance
aac(3)-IId	QH17	NODE_82_length_2074_cov_63.760140	110..970	Aminoglycoside resistance
aac(3)-IId	FY216	NODE_82_length_2076_cov_71.750875	1106..1966	Aminoglycoside resistance
aac(3)-IId	CQ73	NODE_82_length_3512_cov_142.933042	113..973	Aminoglycoside resistance
aac(3)-IId	HB45	NODE_82_length_3905_cov_82.456635	2704..3564	Aminoglycoside resistance
aac(3)-IId	HUBS24	NODE_82_length_6139_cov_76.102276	5169..6029	Aminoglycoside resistance
aac(3)-IId	CQ48	NODE_83_length_2679_cov_144.388547	1105..1965	Aminoglycoside resistance
aac(3)-IId	CQ75	NODE_83_length_3512_cov_128.723435	113..973	Aminoglycoside resistance
aac(3)-IId	YN34	NODE_83_length_3919_cov_188.402395	2705..3565	Aminoglycoside resistance
aac(3)-IId	AH27	NODE_84_length_3512_cov_104.028821	113..973	Aminoglycoside resistance
aac(3)-IId	AH10	NODE_85_length_3344_cov_97.296908	2372..3232	Aminoglycoside resistance
aac(3)-IId	XD37	NODE_85_length_3905_cov_119.829154	341..1201	Aminoglycoside resistance
aac(3)-IId	SD1	NODE_85_length_4471_cov_78.284934	2705..3565	Aminoglycoside resistance
aac(3)-IId	XJ5	NODE_85_length_5544_cov_95.475947	1978..2838	Aminoglycoside resistance
aac(3)-IId	JX21	NODE_86_length_2076_cov_77.619810	1106..1966	Aminoglycoside resistance
aac(3)-IId	GS123	NODE_86_length_5544_cov_121.903603	1978..2838	Aminoglycoside resistance
aac(3)-IId	HUNS34	NODE_87_length_2076_cov_59.275638	111..971	Aminoglycoside resistance
aac(3)-IId	AH9	NODE_87_length_2147_cov_162.128986	192..1052	Aminoglycoside resistance
aac(3)-IId	CQ3	NODE_87_length_2227_cov_152.348372	1104..1964	Aminoglycoside resistance
aac(3)-IId	AH8	NODE_87_length_3344_cov_110.619529	113..973	Aminoglycoside resistance
aac(3)-IId	HUN83	NODE_87_length_4299_cov_147.604216	734..1594	Aminoglycoside resistance
aac(3)-IId	TJ	NODE_88_length_1749_cov_66.699163	113..973	Aminoglycoside resistance
aac(3)-IId	SH63	NODE_88_length_2182_cov_76.041330	601..1461	Aminoglycoside resistance
aac(3)-IId	CQ42	NODE_89_length_2679_cov_81.656802	1105..1965	Aminoglycoside resistance
aac(3)-IId	HUBS28	NODE_89_length_3679_cov_77.809550	2707..3567	Aminoglycoside resistance
aac(3)-IId	CQ12	NODE_90_length_3906_cov_86.834160	340..1200	Aminoglycoside resistance
aac(3)-IId	YN39	NODE_90_length_3919_cov_119.918011	2705..3565	Aminoglycoside resistance
aac(3)-IId	JX42	NODE_91_length_2680_cov_113.040338	715..1575	Aminoglycoside resistance
aac(3)-IId	GS93	NODE_91_length_3830_cov_123.757527	264..1124	Aminoglycoside resistance
aac(3)-IId	HUN89	NODE_92_length_2076_cov_85.081041	1104..1964	Aminoglycoside resistance
aac(3)-IId	FY45	NODE_92_length_6140_cov_319.821705	112..972	Aminoglycoside resistance
aac(3)-IId	AH16	NODE_93_length_3512_cov_98.204367	2540..3400	Aminoglycoside resistance
aac(3)-IId	S181	NODE_94_length_2677_cov_162.747692	714..1574	Aminoglycoside resistance
aac(3)-IId	JX4	NODE_94_length_2680_cov_123.009220	715..1575	Aminoglycoside resistance
aac(3)-IId	XJ48	NODE_94_length_4011_cov_117.990595	445..1305	Aminoglycoside resistance
aac(3)-IId	CQ46	NODE_95_length_2184_cov_135.453251	220..1080	Aminoglycoside resistance
aac(3)-IId	GZ34	NODE_95_length_3678_cov_137.327131	113..973	Aminoglycoside resistance
aac(3)-IId	HUN105	NODE_95_length_3679_cov_106.445586	2707..3567	Aminoglycoside resistance
aac(3)-IId	SAX4	NODE_97_length_4105_cov_120.403178	538..1398	Aminoglycoside resistance
aac(3)-IId	S79	NODE_97_length_4277_cov_75.710476	713..1573	Aminoglycoside resistance
aac(3)-IId	CQ51	NODE_98_length_2184_cov_119.771239	1105..1965	Aminoglycoside resistance
aac(3)-IId	S61	NODE_98_length_4277_cov_83.256905	2705..3565	Aminoglycoside resistance
aac(3)-IId	FY227	NODE_99_length_1690_cov_122.158710	111..971	Aminoglycoside resistance
aac(3)-IId	NMG12	NODE_99_length_3678_cov_129.374063	2707..3567	Aminoglycoside resistance
aac(3)-IId	XJ49	NODE_99_length_3787_cov_78.380863	2708..3568	Aminoglycoside resistance
aac(3)-IId	NMG32	NODE_99_length_3906_cov_88.790024	2707..3567	Aminoglycoside resistance
aac(3)-IId	HUN59	NODE_99_length_4099_cov_73.999005	2705..3565	Aminoglycoside resistance
aac(3)-IId	S212	NODE_99_length_4687_cov_194.474837	1121..1981	Aminoglycoside resistance
aac(3)-IIe	JX25	NODE_127_length_862_cov_86.531210	117..862	Aminoglycoside resistance
aac(3)-IV	XD35	2 length=244138 depth=1.09x circular=true	108690..109466	Aminoglycoside resistance
aac(3)-IV	XD35	3 length=119611 depth=1.19x	95377..96153	Aminoglycoside resistance
aac(3)-IV	E_coli_RXD10	E_coli_RXD10_ctg0065 Escherichia coli ATCC 25922	8298..9074	Aminoglycoside resistance
aac(3)-IV	XD11	E_coli_RXD11_ctg0083 Escherichia coli ATCC 25922	8305..9081	Aminoglycoside resistance
aac(3)-IV	XD33	E_coli_RXD33_ctg0085 Escherichia coli ATCC 25922	8305..9081	Aminoglycoside resistance
aac(3)-IV	XD36	E_coli_RXD36_ctg0081 Escherichia coli ATCC 25922	8390..9166	Aminoglycoside resistance
aac(3)-IV	E_coli_RXD5	E_coli_RXD5_ctg0068	8298..9074	Aminoglycoside resistance
aac(3)-IV	S79	NODE_105_length_3491_cov_147.375513	127..903	Aminoglycoside resistance
aac(3)-IV	S61	NODE_106_length_3491_cov_136.848858	2589..3365	Aminoglycoside resistance
aac(3)-IV	GZ31	NODE_109_length_3842_cov_137.882869	125..901	Aminoglycoside resistance
aac(3)-IV	CQ72	NODE_110_length_3489_cov_95.340270	125..901	Aminoglycoside resistance
aac(3)-IV	S194	NODE_118_length_3489_cov_98.866940	125..901	Aminoglycoside resistance
aac(3)-IV	FY183	NODE_121_length_858_cov_174.125480	125..858	Aminoglycoside resistance
aac(3)-IV	HB6	NODE_214_length_1192_cov_1448.875336	126..902	Aminoglycoside resistance
aac(3)-IV	AH96	NODE_35_length_41760_cov_167.084183	128..904	Aminoglycoside resistance
aac(3)-IV	S95	NODE_35_length_52634_cov_92.072797	128..904	Aminoglycoside resistance
aac(3)-IV	HB42	NODE_36_length_32295_cov_65.553045	31392..32168	Aminoglycoside resistance
aac(3)-IV	HUN20	NODE_37_length_9156_cov_93.790946	8254..9030	Aminoglycoside resistance
aac(3)-IV	S104	NODE_38_length_9159_cov_144.092160	8257..9033	Aminoglycoside resistance
aac(3)-IV	GZ40	NODE_42_length_10665_cov_106.756233	128..904	Aminoglycoside resistance
aac(3)-IV	SC1	NODE_42_length_7063_cov_84.310335	128..904	Aminoglycoside resistance
aac(3)-IV	HUN29	NODE_44_length_8226_cov_88.954350	128..904	Aminoglycoside resistance
aac(3)-IV	HUN27	NODE_44_length_8226_cov_91.911155	7323..8099	Aminoglycoside resistance
aac(3)-IV	HUN4	NODE_47_length_9159_cov_91.422814	128..904	Aminoglycoside resistance
aac(3)-IV	HUBJ8	NODE_50_length_8100_cov_103.186589	7198..7974	Aminoglycoside resistance
aac(3)-IV	HUN24	NODE_50_length_9159_cov_88.565294	127..903	Aminoglycoside resistance
aac(3)-IV	XD1	NODE_51_length_5759_cov_114.643435	4856..5632	Aminoglycoside resistance
aac(3)-IV	XD2	NODE_51_length_7201_cov_105.569483	6298..7074	Aminoglycoside resistance
aac(3)-IV	XD101	NODE_52_length_9159_cov_143.388351	128..904	Aminoglycoside resistance
aac(3)-IV	HUN115	NODE_53_length_9159_cov_90.307311	8257..9033	Aminoglycoside resistance
aac(3)-IV	FY261	NODE_54_length_7200_cov_90.455566	6298..7074	Aminoglycoside resistance
aac(3)-IV	FY257	NODE_55_length_7200_cov_164.222097	6298..7074	Aminoglycoside resistance
aac(3)-IV	S89	NODE_56_length_10364_cov_155.264897	128..904	Aminoglycoside resistance
aac(3)-IV	FY240	NODE_56_length_7014_cov_63.405074	6112..6888	Aminoglycoside resistance
aac(3)-IV	S49	NODE_56_length_9158_cov_151.995155	8256..9032	Aminoglycoside resistance
aac(3)-IV	FY267	NODE_57_length_7200_cov_89.637512	6298..7074	Aminoglycoside resistance
aac(3)-IV	FY66	NODE_57_length_9158_cov_170.435194	127..903	Aminoglycoside resistance
aac(3)-IV	NMG24	NODE_58_length_20439_cov_72.424025	19536..20312	Aminoglycoside resistance
aac(3)-IV	SAX2	NODE_58_length_7278_cov_78.739619	128..904	Aminoglycoside resistance
aac(3)-IV	S205	NODE_58_length_9160_cov_134.493119	128..904	Aminoglycoside resistance
aac(3)-IV	HUN15	NODE_59_length_7134_cov_94.295876	6234..7010	Aminoglycoside resistance
aac(3)-IV	AH28	NODE_60_length_3489_cov_93.107855	125..901	Aminoglycoside resistance
aac(3)-IV	SD1	NODE_61_length_15052_cov_76.365275	14152..14928	Aminoglycoside resistance
aac(3)-IV	XJ12	NODE_61_length_8101_cov_106.220962	128..904	Aminoglycoside resistance
aac(3)-IV	XJ13	NODE_61_length_8101_cov_106.354811	7198..7974	Aminoglycoside resistance
aac(3)-IV	XJ9	NODE_62_length_8101_cov_97.888709	128..904	Aminoglycoside resistance
aac(3)-IV	XJ4	NODE_63_length_8101_cov_92.070289	128..904	Aminoglycoside resistance
aac(3)-IV	HUN14	NODE_65_length_9159_cov_82.462013	128..904	Aminoglycoside resistance
aac(3)-IV	S91	NODE_65_length_9160_cov_164.787295	8257..9033	Aminoglycoside resistance
aac(3)-IV	S70	NODE_66_length_9157_cov_160.501432	8255..9031	Aminoglycoside resistance
aac(3)-IV	SHB15	NODE_67_length_8226_cov_207.718861	7323..8099	Aminoglycoside resistance
aac(3)-IV	JX10	NODE_67_length_9158_cov_62.039533	127..903	Aminoglycoside resistance
aac(3)-IV	CQ78	NODE_68_length_8100_cov_75.135859	7198..7974	Aminoglycoside resistance
aac(3)-IV	YN13	NODE_69_length_8226_cov_120.005890	128..904	Aminoglycoside resistance
aac(3)-IV	SAX15	NODE_70_length_3492_cov_92.483748	128..904	Aminoglycoside resistance
aac(3)-IV	S67	NODE_71_length_9159_cov_114.133671	127..903	Aminoglycoside resistance
aac(3)-IV	HUN23	NODE_71_length_9159_cov_83.341445	8256..9032	Aminoglycoside resistance
aac(3)-IV	SHB6	NODE_72_length_7063_cov_70.924279	128..904	Aminoglycoside resistance
aac(3)-IV	HUN16	NODE_72_length_9157_cov_80.617181	8254..9030	Aminoglycoside resistance
aac(3)-IV	LN42	NODE_73_length_7014_cov_106.763298	6112..6888	Aminoglycoside resistance
aac(3)-IV	SAX16	NODE_74_length_3392_cov_102.453997	126..902	Aminoglycoside resistance
aac(3)-IV	S192	NODE_75_length_3489_cov_273.375733	2589..3365	Aminoglycoside resistance
aac(3)-IV	S196	NODE_76_length_6913_cov_184.172908	125..901	Aminoglycoside resistance
aac(3)-IV	XJ15	NODE_76_length_7201_cov_168.568080	6298..7074	Aminoglycoside resistance
aac(3)-IV	CQ79	NODE_76_length_8100_cov_112.452449	7198..7974	Aminoglycoside resistance
aac(3)-IV	HUN11	NODE_76_length_9159_cov_101.048998	8256..9032	Aminoglycoside resistance
aac(3)-IV	HUN59	NODE_77_length_9159_cov_93.994715	8256..9032	Aminoglycoside resistance
aac(3)-IV	S208	NODE_78_length_3489_cov_260.960141	2589..3365	Aminoglycoside resistance
aac(3)-IV	S206	NODE_78_length_7015_cov_162.848948	6112..6888	Aminoglycoside resistance
aac(3)-IV	XJ17	NODE_79_length_8226_cov_97.710271	7323..8099	Aminoglycoside resistance
aac(3)-IV	HUN58	NODE_79_length_9159_cov_81.802026	8256..9032	Aminoglycoside resistance
aac(3)-IV	FY229	NODE_81_length_3489_cov_149.230363	125..901	Aminoglycoside resistance
aac(3)-IV	SAX4	NODE_81_length_8224_cov_126.684546	7323..8099	Aminoglycoside resistance
aac(3)-IV	FY74	NODE_81_length_9570_cov_107.040135	8646..9422	Aminoglycoside resistance
aac(3)-IV	S198	NODE_82_length_3489_cov_305.202227	125..901	Aminoglycoside resistance
aac(3)-IV	S82	NODE_82_length_9155_cov_130.919696	127..903	Aminoglycoside resistance
aac(3)-IV	FY44	NODE_82_length_9158_cov_132.769739	8255..9031	Aminoglycoside resistance
aac(3)-IV	S191	NODE_83_length_3839_cov_188.838650	125..901	Aminoglycoside resistance
aac(3)-IV	FY268	NODE_84_length_3489_cov_91.592321	2589..3365	Aminoglycoside resistance
aac(3)-IV	SD7	NODE_84_length_6938_cov_88.528203	128..904	Aminoglycoside resistance
aac(3)-IV	S195	NODE_88_length_2560_cov_125.064438	125..901	Aminoglycoside resistance
aac(3)-IV	FY241	NODE_88_length_3489_cov_113.598769	2589..3365	Aminoglycoside resistance
aac(3)-IV	GZ9	NODE_88_length_9156_cov_77.197599	8255..9031	Aminoglycoside resistance
aac(3)-IV	GZ29	NODE_89_length_9156_cov_122.478467	8255..9031	Aminoglycoside resistance
aac(3)-IV	HB33	NODE_91_length_3489_cov_167.504396	2589..3365	Aminoglycoside resistance
aac(3)-IV	HB36	NODE_91_length_3489_cov_167.504396	2589..3365	Aminoglycoside resistance
aac(3)-IV	FY253	NODE_92_length_3489_cov_59.840563	2589..3365	Aminoglycoside resistance
aac(3)-IV	HUN8	NODE_92_length_9152_cov_114.038347	127..903	Aminoglycoside resistance
aac(3)-IV	GS61	NODE_93_length_3489_cov_133.622802	2589..3365	Aminoglycoside resistance
aac(3)-IV	HLJ34	NODE_93_length_8400_cov_105.020786	126..902	Aminoglycoside resistance
aac(3)-IV	FY256	NODE_95_length_9158_cov_115.303050	127..903	Aminoglycoside resistance
aac(3)-IV	GZ10	NODE_98_length_3920_cov_131.022118	3020..3796	Aminoglycoside resistance
aac(3)-VIa	QH9	NODE_61_length_6831_cov_104.360379	4892..5794	Aminoglycoside resistance
aac(3)-VIa	QH8	NODE_62_length_6831_cov_76.109713	1038..1940	Aminoglycoside resistance
aac(3)-VIa	HUN111	NODE_72_length_5969_cov_69.149016	4890..5792	Aminoglycoside resistance
aac(3)-VIa	S204	NODE_73_length_5868_cov_132.337247	4893..5795	Aminoglycoside resistance
aac(6')-Ib3	HB84	NODE_113_length_1130_cov_97.070275	218..772	Aminoglycoside resistance
aac(6')-Ib3	FY45	NODE_113_length_2588_cov_232.781362	1683..2237	Aminoglycoside resistance
aac(6')-Ib3	S196	NODE_122_length_1054_cov_192.301945	142..696	Aminoglycoside resistance
aac(6')-Ib3	HUN84	NODE_151_length_1054_cov_98.397134	359..913	Aminoglycoside resistance
aac(6')-Ib3	HUN128	NODE_170_length_1054_cov_62.329580	359..913	Aminoglycoside resistance
aac(6')-Ib3	HUN75	NODE_182_length_1054_cov_74.581372	359..913	Aminoglycoside resistance
aac(6')-Ib3	TJ	NODE_64_length_6902_cov_56.470769	142..696	Aminoglycoside resistance
aac(6')-Ib3	AH40	NODE_66_length_7507_cov_105.906460	6812..7366	Aminoglycoside resistance
aac(6')-Ib3	NX2	NODE_72_length_8303_cov_103.441162	6812..7366	Aminoglycoside resistance
aac(6')-Ib3	S73	NODE_75_length_1613_cov_258.388021	347..901	Aminoglycoside resistance
aac(6')-Ib3	AH37	NODE_76_length_4275_cov_105.850881	3580..4134	Aminoglycoside resistance
aac(6')-Ib3	AH10	NODE_80_length_4275_cov_85.486899	142..696	Aminoglycoside resistance
aac(6')-Ib3	AH8	NODE_81_length_4275_cov_86.620772	142..696	Aminoglycoside resistance
aac(6')-Ib3	AH27	NODE_88_length_3040_cov_93.904489	142..696	Aminoglycoside resistance
aac(6')-Ib3	NX28	NODE_89_length_3039_cov_117.606009	2344..2898	Aminoglycoside resistance
aac(6')-Ib3	AH4	NODE_89_length_3040_cov_96.075937	2345..2899	Aminoglycoside resistance
aac(6')-Ib3	AH16	NODE_98_length_3040_cov_107.588593	2345..2899	Aminoglycoside resistance
aac(6')-Ib-cr	XD35	4 length=91077 depth=0.74x circular=true	35532..36131	Fluoroquinolone and aminoglycoside resistance
aac(6')-Ib-cr	XD33	E_coli_RXD33_ctg0129 Escherichia coli ATCC 25922	166..765	Fluoroquinolone and aminoglycoside resistance
aac(6')-Ib-cr	SAX4	NODE_102_length_3428_cov_117.258729	2708..3307	Fluoroquinolone and aminoglycoside resistance
aac(6')-Ib-cr	HB84	NODE_113_length_1130_cov_97.070275	254..772	Fluoroquinolone and aminoglycoside resistance
aac(6')-Ib-cr	FY45	NODE_113_length_2588_cov_232.781362	1683..2201	Fluoroquinolone and aminoglycoside resistance
aac(6')-Ib-cr	FY251	NODE_116_length_4928_cov_56.498454	4144..4743	Fluoroquinolone and aminoglycoside resistance
aac(6')-Ib-cr	HLJ34	NODE_119_length_3427_cov_96.682090	121..720	Fluoroquinolone and aminoglycoside resistance
aac(6')-Ib-cr	S196	NODE_122_length_1054_cov_192.301945	178..696	Fluoroquinolone and aminoglycoside resistance
aac(6')-Ib-cr	HUN84	NODE_151_length_1054_cov_98.397134	359..877	Fluoroquinolone and aminoglycoside resistance
aac(6')-Ib-cr	HUN128	NODE_170_length_1054_cov_62.329580	359..877	Fluoroquinolone and aminoglycoside resistance
aac(6')-Ib-cr	HUN75	NODE_182_length_1054_cov_74.581372	359..877	Fluoroquinolone and aminoglycoside resistance
aac(6')-Ib-cr	HUN89	NODE_24_length_59671_cov_123.251082	57455..58054	Fluoroquinolone and aminoglycoside resistance
aac(6')-Ib-cr	NMG5	NODE_37_length_3938_cov_71.178192	3155..3754	Fluoroquinolone and aminoglycoside resistance
aac(6')-Ib-cr	NMG3	NODE_38_length_4167_cov_113.353790	414..1013	Fluoroquinolone and aminoglycoside resistance
aac(6')-Ib-cr	NMG9	NODE_40_length_4164_cov_207.972107	414..1013	Fluoroquinolone and aminoglycoside resistance
aac(6')-Ib-cr	XJ26	NODE_42_length_8094_cov_184.596981	6872..7471	Fluoroquinolone and aminoglycoside resistance
aac(6')-Ib-cr	CQ31	NODE_43_length_12163_cov_152.804402	1345..1944	Fluoroquinolone and aminoglycoside resistance
aac(6')-Ib-cr	XJ33	NODE_43_length_8094_cov_122.481103	624..1223	Fluoroquinolone and aminoglycoside resistance
aac(6')-Ib-cr	XJ36	NODE_43_length_8094_cov_132.106648	6872..7471	Fluoroquinolone and aminoglycoside resistance
aac(6')-Ib-cr	NMG8	NODE_44_length_2638_cov_58.323311	1855..2454	Fluoroquinolone and aminoglycoside resistance
aac(6')-Ib-cr	GZ12	NODE_48_length_6514_cov_91.292994	184..783	Fluoroquinolone and aminoglycoside resistance
aac(6')-Ib-cr	AH28	NODE_49_length_7654_cov_108.173288	6872..7471	Fluoroquinolone and aminoglycoside resistance
aac(6')-Ib-cr	S201	NODE_59_length_13147_cov_255.632670	10033..10632	Fluoroquinolone and aminoglycoside resistance
aac(6')-Ib-cr	QH7	NODE_59_length_4060_cov_140.919659	1005..1604	Fluoroquinolone and aminoglycoside resistance
aac(6')-Ib-cr	QH2	NODE_61_length_4060_cov_163.766759	2457..3056	Fluoroquinolone and aminoglycoside resistance
aac(6')-Ib-cr	XJ35	NODE_63_length_6746_cov_131.134353	414..1013	Fluoroquinolone and aminoglycoside resistance
aac(6')-Ib-cr	TJ	NODE_64_length_6902_cov_56.470769	178..696	Fluoroquinolone and aminoglycoside resistance
aac(6')-Ib-cr	HUNS46	NODE_64_length_7634_cov_83.044065	5606..6205	Fluoroquinolone and aminoglycoside resistance
aac(6')-Ib-cr	AH40	NODE_66_length_7507_cov_105.906460	6812..7330	Fluoroquinolone and aminoglycoside resistance
aac(6')-Ib-cr	HB27	NODE_70_length_4312_cov_83.994805	1006..1605	Fluoroquinolone and aminoglycoside resistance
aac(6')-Ib-cr	HB33	NODE_71_length_4312_cov_101.289965	1006..1605	Fluoroquinolone and aminoglycoside resistance
aac(6')-Ib-cr	NX2	NODE_72_length_8303_cov_103.441162	6812..7330	Fluoroquinolone and aminoglycoside resistance
aac(6')-Ib-cr	HB33	NODE_73_length_6813_cov_168.220457	123..722	Fluoroquinolone and aminoglycoside resistance
aac(6')-Ib-cr	HB36	NODE_73_length_6813_cov_168.220457	123..722	Fluoroquinolone and aminoglycoside resistance
aac(6')-Ib-cr	S73	NODE_75_length_1613_cov_258.388021	383..901	Fluoroquinolone and aminoglycoside resistance
aac(6')-Ib-cr	AH37	NODE_76_length_4275_cov_105.850881	3580..4098	Fluoroquinolone and aminoglycoside resistance
aac(6')-Ib-cr	FY183	NODE_78_length_4850_cov_67.074586	124..723	Fluoroquinolone and aminoglycoside resistance
aac(6')-Ib-cr	AH10	NODE_80_length_4275_cov_85.486899	178..696	Fluoroquinolone and aminoglycoside resistance
aac(6')-Ib-cr	HUN45	NODE_81_length_3239_cov_64.967109	2457..3056	Fluoroquinolone and aminoglycoside resistance
aac(6')-Ib-cr	HUN56	NODE_81_length_3239_cov_70.496837	2457..3056	Fluoroquinolone and aminoglycoside resistance
aac(6')-Ib-cr	AH8	NODE_81_length_4275_cov_86.620772	178..696	Fluoroquinolone and aminoglycoside resistance
aac(6')-Ib-cr	AH27	NODE_88_length_3040_cov_93.904489	178..696	Fluoroquinolone and aminoglycoside resistance
aac(6')-Ib-cr	NX28	NODE_89_length_3039_cov_117.606009	2344..2862	Fluoroquinolone and aminoglycoside resistance
aac(6')-Ib-cr	AH4	NODE_89_length_3040_cov_96.075937	2345..2863	Fluoroquinolone and aminoglycoside resistance
aac(6')-Ib-cr	ZJ29	NODE_91_length_3936_cov_106.597823	3154..3753	Fluoroquinolone and aminoglycoside resistance
aac(6')-Ib-cr	SAX6	NODE_92_length_3047_cov_81.607071	2264..2863	Fluoroquinolone and aminoglycoside resistance
aac(6')-Ib-cr	SD7	NODE_93_length_3490_cov_67.096982	184..783	Fluoroquinolone and aminoglycoside resistance
aac(6')-Ib-cr	S56	NODE_93_length_3841_cov_134.392667	3154..3753	Fluoroquinolone and aminoglycoside resistance
aac(6')-Ib-cr	AH16	NODE_98_length_3040_cov_107.588593	2345..2863	Fluoroquinolone and aminoglycoside resistance
aac(6')-Ib-cr	GS128	NODE_99_length_4758_cov_124.625721	1005..1604	Fluoroquinolone and aminoglycoside resistance
aac(6')-Il	FY249	NODE_162_length_2285_cov_179.553895	128..586	Aminoglycoside resistance
aac(6')-Il	FY252	NODE_239_length_2285_cov_149.872736	128..586	Aminoglycoside resistance
aadA1	XD35	2 length=244138 depth=1.09x circular=true	114830..115621	Aminoglycoside resistance
aadA1	XD35	2 length=244138 depth=1.09x circular=true	154167..154958	Aminoglycoside resistance
aadA1	XD35	3 length=119611 depth=1.19x	76539..77330	Aminoglycoside resistance
aadA1	E_coli_RXD10	E_coli_RXD10_ctg0335 Escherichia coli ATCC 25922	1..584	Aminoglycoside resistance
aadA1	XD100	E_coli_RXD100_ctg0059 Escherichia coli ATCC 25922	4850..5641	Aminoglycoside resistance
aadA1	XD11	E_coli_RXD11_ctg0347 Escherichia coli ATCC 25922	1..584	Aminoglycoside resistance
aadA1	XD115	E_coli_RXD115_ctg0082 Escherichia coli ATCC 25922	684..1475	Aminoglycoside resistance
aadA1	XD12	E_coli_RXD12_ctg0149 Escherichia coli ATCC 25922	59..839	Aminoglycoside resistance
aadA1	XD20	E_coli_RXD20_ctg0089 Escherichia coli ATCC 25922	59..850	Aminoglycoside resistance
aadA1	XD24	E_coli_RXD24_ctg0161 Escherichia coli ATCC 25922	59..839	Aminoglycoside resistance
aadA1	XD33	E_coli_RXD33_ctg0314 Escherichia coli ATCC 25922	1..611	Aminoglycoside resistance
aadA1	XD36	E_coli_RXD36_ctg0403 Escherichia coli ATCC 25922	1..611	Aminoglycoside resistance
aadA1	E_coli_RXD5	E_coli_RXD5_ctg0573	1..584	Aminoglycoside resistance
aadA1	XD97	E_coli_RXD97_ctg0045 Escherichia coli ATCC 25922	1693..2484	Aminoglycoside resistance
aadA1	S89	NODE_100_length_584_cov_435.891519	1..584	Aminoglycoside resistance
aadA1	CQ10	NODE_101_length_584_cov_137.313609	1..584	Aminoglycoside resistance
aadA1	FY66	NODE_101_length_611_cov_303.988764	1..611	Aminoglycoside resistance
aadA1	QH4	NODE_101_length_7191_cov_74.940680	1633..2424	Aminoglycoside resistance
aadA1	HUN71	NODE_103_length_711_cov_141.152997	1..711	Aminoglycoside resistance
aadA1	HLJ34	NODE_104_length_5338_cov_98.659380	1894..2685	Aminoglycoside resistance
aadA1	FY240	NODE_104_length_584_cov_189.520710	1..584	Aminoglycoside resistance
aadA1	HUN24	NODE_104_length_584_cov_432.122288	1..584	Aminoglycoside resistance
aadA1	SAX4	NODE_105_length_2814_cov_138.643405	1894..2685	Aminoglycoside resistance
aadA1	HUN9	NODE_105_length_611_cov_227.069288	1..611	Aminoglycoside resistance
aadA1	FY230	NODE_106_length_584_cov_221.477318	1..584	Aminoglycoside resistance
aadA1	S70	NODE_106_length_584_cov_439.426036	1..584	Aminoglycoside resistance
aadA1	FY251	NODE_106_length_6995_cov_77.221307	1634..2425	Aminoglycoside resistance
aadA1	S205	NODE_107_length_584_cov_401.465483	1..584	Aminoglycoside resistance
aadA1	ZJ20	NODE_107_length_5973_cov_84.147049	861..1652	Aminoglycoside resistance
aadA1	HUN83	NODE_108_length_1101_cov_138.666992	227..1018	Aminoglycoside resistance
aadA1	SAX6	NODE_108_length_1581_cov_115.843750	130..921	Aminoglycoside resistance
aadA1	S191	NODE_109_length_1436_cov_427.853569	888..1436	Aminoglycoside resistance
aadA1	S49	NODE_109_length_611_cov_290.588015	1..611	Aminoglycoside resistance
aadA1	HUN111	NODE_112_length_717_cov_212.029687	1..654	Aminoglycoside resistance
aadA1	HUN15	NODE_113_length_584_cov_350.282051	1..584	Aminoglycoside resistance
aadA1	HUN14	NODE_113_length_584_cov_375.475345	1..584	Aminoglycoside resistance
aadA1	HUN38	NODE_113_length_611_cov_259.694757	1..611	Aminoglycoside resistance
aadA1	CQ27	NODE_115_length_584_cov_189.443787	1..584	Aminoglycoside resistance
aadA1	CQ63	NODE_116_length_3065_cov_111.035141	1633..2424	Aminoglycoside resistance
aadA1	SD5	NODE_117_length_11651_cov_157.153966	4923..5714	Aminoglycoside resistance
aadA1	GZ55	NODE_118_length_711_cov_206.761830	1..711	Aminoglycoside resistance
aadA1	AH15	NODE_119_length_11868_cov_74.248579	5102..5893	Aminoglycoside resistance
aadA1	HUN16	NODE_119_length_584_cov_214.015779	1..584	Aminoglycoside resistance
aadA1	XJ49	NODE_120_length_1101_cov_71.658203	227..1018	Aminoglycoside resistance
aadA1	FY239	NODE_120_length_584_cov_220.179487	1..584	Aminoglycoside resistance
aadA1	HUN13	NODE_121_length_611_cov_383.131086	1..611	Aminoglycoside resistance
aadA1	FY207	NODE_122_length_616_cov_205.476809	1..601	Aminoglycoside resistance
aadA1	S91	NODE_123_length_584_cov_551.715976	1..584	Aminoglycoside resistance
aadA1	YN34	NODE_123_length_732_cov_536.097710	1..722	Aminoglycoside resistance
aadA1	S180	NODE_124_length_611_cov_275.951311	1..611	Aminoglycoside resistance
aadA1	FY246	NODE_126_length_616_cov_171.619666	1..601	Aminoglycoside resistance
aadA1	S57	NODE_126_length_865_cov_72.162437	15..806	Aminoglycoside resistance
aadA1	S75	NODE_127_length_584_cov_300.459566	1..584	Aminoglycoside resistance
aadA1	XD101	NODE_127_length_584_cov_401.905325	1..584	Aminoglycoside resistance
aadA1	HUN49	NODE_127_length_693_cov_248.797078	11..693	Aminoglycoside resistance
aadA1	AH84	NODE_127_length_711_cov_161.137224	1..711	Aminoglycoside resistance
aadA1	FY241	NODE_127_length_732_cov_321.357252	11..732	Aminoglycoside resistance
aadA1	YN39	NODE_127_length_732_cov_340.105344	1..722	Aminoglycoside resistance
aadA1	CQ69	NODE_129_length_584_cov_224.832347	1..584	Aminoglycoside resistance
aadA1	S67	NODE_129_length_584_cov_336.966469	1..584	Aminoglycoside resistance
aadA1	JX12	NODE_129_length_711_cov_209.238170	1..711	Aminoglycoside resistance
aadA1	HB84	NODE_130_length_584_cov_250.729783	1..584	Aminoglycoside resistance
aadA1	S78	NODE_138_length_584_cov_231.544379	1..584	Aminoglycoside resistance
aadA1	S196	NODE_139_length_584_cov_507.473373	1..584	Aminoglycoside resistance
aadA1	GS138	NODE_140_length_547_cov_296.006383	1..547	Aminoglycoside resistance
aadA1	S72	NODE_144_length_584_cov_281.745562	1..584	Aminoglycoside resistance
aadA1	FY213	NODE_145_length_584_cov_270.017751	1..584	Aminoglycoside resistance
aadA1	S211	NODE_146_length_584_cov_238.812623	1..584	Aminoglycoside resistance
aadA1	LN10	NODE_148_length_736_cov_179.549317	1..722	Aminoglycoside resistance
aadA1	LN32	NODE_148_length_736_cov_211.221548	1..722	Aminoglycoside resistance
aadA1	S61	NODE_151_length_584_cov_359.668639	1..584	Aminoglycoside resistance
aadA1	S79	NODE_152_length_584_cov_402.952663	1..584	Aminoglycoside resistance
aadA1	HUN128	NODE_154_length_2059_cov_104.820888	1..722	Aminoglycoside resistance
aadA1	HUN7	NODE_157_length_584_cov_388.035503	1..584	Aminoglycoside resistance
aadA1	FY44	NODE_157_length_584_cov_418.735700	1..584	Aminoglycoside resistance
aadA1	FY74	NODE_158_length_584_cov_239.512821	1..584	Aminoglycoside resistance
aadA1	FY256	NODE_158_length_584_cov_311.992110	1..584	Aminoglycoside resistance
aadA1	HUN23	NODE_160_length_545_cov_334.420940	1..545	Aminoglycoside resistance
aadA1	CQ2	NODE_162_length_584_cov_159.426036	1..584	Aminoglycoside resistance
aadA1	CQ7	NODE_166_length_584_cov_164.528600	1..584	Aminoglycoside resistance
aadA1	SD12	NODE_167_length_584_cov_240.708087	1..584	Aminoglycoside resistance
aadA1	HUN84	NODE_169_length_616_cov_181.901670	16..616	Aminoglycoside resistance
aadA1	GS105	NODE_170_length_611_cov_382.026217	1..611	Aminoglycoside resistance
aadA1	AH24	NODE_170_length_711_cov_200.113565	1..711	Aminoglycoside resistance
aadA1	CQ12	NODE_172_length_584_cov_180.410256	1..584	Aminoglycoside resistance
aadA1	GS99	NODE_172_length_611_cov_355.297753	1..611	Aminoglycoside resistance
aadA1	LN42	NODE_173_length_584_cov_267.021696	1..584	Aminoglycoside resistance
aadA1	CQ16	NODE_174_length_584_cov_230.960552	1..584	Aminoglycoside resistance
aadA1	HUN59	NODE_174_length_584_cov_315.560158	1..584	Aminoglycoside resistance
aadA1	JX18	NODE_175_length_584_cov_281.530572	1..584	Aminoglycoside resistance
aadA1	GZ9	NODE_176_length_711_cov_148.212934	1..711	Aminoglycoside resistance
aadA1	S194	NODE_176_length_839_cov_154.682415	59..839	Aminoglycoside resistance
aadA1	CQ1	NODE_178_length_584_cov_326.110454	1..584	Aminoglycoside resistance
aadA1	AH41	NODE_178_length_711_cov_261.545741	1..711	Aminoglycoside resistance
aadA1	HUN11	NODE_180_length_584_cov_380.341223	1..584	Aminoglycoside resistance
aadA1	GZ10	NODE_181_length_611_cov_294.698502	1..611	Aminoglycoside resistance
aadA1	S73	NODE_184_length_611_cov_307.632959	1..611	Aminoglycoside resistance
aadA1	CQ72	NODE_186_length_584_cov_341.473373	1..584	Aminoglycoside resistance
aadA1	HUN58	NODE_187_length_584_cov_348.435897	1..584	Aminoglycoside resistance
aadA1	XJ17	NODE_191_length_862_cov_446.747771	11..802	Aminoglycoside resistance
aadA1	S82	NODE_198_length_611_cov_524.657303	1..611	Aminoglycoside resistance
aadA1	GZ29	NODE_203_length_711_cov_226.454259	1..711	Aminoglycoside resistance
aadA1	HUN75	NODE_204_length_584_cov_267.840237	1..584	Aminoglycoside resistance
aadA1	GZ31	NODE_218_length_611_cov_329.829588	1..611	Aminoglycoside resistance
aadA1	FY252	NODE_220_length_2729_cov_142.150075	1297..2088	Aminoglycoside resistance
aadA1	XD116	NODE_24_length_68031_cov_102.331872	62670..63461	Aminoglycoside resistance
aadA1	HUN109	NODE_24_length_91499_cov_146.388998	10625..11413	Aminoglycoside resistance
aadA1	HN15	NODE_25_length_21378_cov_73.237829	17278..18069	Aminoglycoside resistance
aadA1	FY119	NODE_25_length_68031_cov_120.122936	62670..63461	Aminoglycoside resistance
aadA1	XJ26	NODE_26_length_62808_cov_109.046373	39587..40375	Aminoglycoside resistance
aadA1	XJ33	NODE_26_length_62808_cov_99.358483	22434..23222	Aminoglycoside resistance
aadA1	XJ36	NODE_26_length_62809_cov_110.134668	39587..40375	Aminoglycoside resistance
aadA1	AH90	NODE_27_length_27072_cov_121.931024	8842..9633	Aminoglycoside resistance
aadA1	CQ67	NODE_27_length_68393_cov_114.716304	62670..63461	Aminoglycoside resistance
aadA1	AH20	NODE_28_length_50760_cov_209.184066	49838..50629	Aminoglycoside resistance
aadA1	XD38	NODE_29_length_11266_cov_81.952811	5938..6729	Aminoglycoside resistance
aadA1	AH11	NODE_29_length_51122_cov_233.651445	50200..50991	Aminoglycoside resistance
aadA1	AH22	NODE_29_length_51166_cov_129.178081	50244..51035	Aminoglycoside resistance
aadA1	AH36	NODE_30_length_9378_cov_109.707773	4374..5165	Aminoglycoside resistance
aadA1	AH12	NODE_30_length_9740_cov_125.512263	4736..5527	Aminoglycoside resistance
aadA1	S99	NODE_31_length_11264_cov_151.926790	4537..5328	Aminoglycoside resistance
aadA1	SAX15	NODE_32_length_44345_cov_97.998102	6146..6937	Aminoglycoside resistance
aadA1	LN44	NODE_34_length_42770_cov_79.093739	5937..6728	Aminoglycoside resistance
aadA1	HUN18	NODE_35_length_5969_cov_176.164630	4370..5161	Aminoglycoside resistance
aadA1	GZ86	NODE_37_length_7343_cov_82.250482	4920..5711	Aminoglycoside resistance
aadA1	AH47	NODE_38_length_11162_cov_89.492287	4541..5332	Aminoglycoside resistance
aadA1	GS33	NODE_38_length_15624_cov_124.695697	4770..5561	Aminoglycoside resistance
aadA1	CQ15	NODE_38_length_15807_cov_59.681818	10249..11040	Aminoglycoside resistance
aadA1	AH1	NODE_38_length_5754_cov_102.103224	642..1433	Aminoglycoside resistance
aadA1	GS34	NODE_39_length_15623_cov_57.590763	10064..10855	Aminoglycoside resistance
aadA1	GS35	NODE_39_length_15623_cov_72.455744	4769..5560	Aminoglycoside resistance
aadA1	CQ17	NODE_39_length_15807_cov_60.785823	10249..11040	Aminoglycoside resistance
aadA1	HUN50	NODE_39_length_5969_cov_94.488629	4370..5161	Aminoglycoside resistance
aadA1	SH41	NODE_4_length_189854_cov_115.437903	149472..150260	Aminoglycoside resistance
aadA1	XD39	NODE_41_length_23914_cov_64.536099	4768..5559	Aminoglycoside resistance
aadA1	GZ12	NODE_43_length_10025_cov_45.418778	5843..6634	Aminoglycoside resistance
aadA1	JX38	NODE_44_length_7192_cov_58.550105	4769..5560	Aminoglycoside resistance
aadA1	HUN82	NODE_45_length_18792_cov_69.347315	7543..8334	Aminoglycoside resistance
aadA1	SD10	NODE_45_length_7193_cov_81.003513	4770..5561	Aminoglycoside resistance
aadA1	HB61	NODE_46_length_35392_cov_101.263514	28409..29200	Aminoglycoside resistance
aadA1	AH48	NODE_46_length_8274_cov_103.206539	6842..7633	Aminoglycoside resistance
aadA1	AH28	NODE_46_length_9185_cov_82.305007	4768..5559	Aminoglycoside resistance
aadA1	HB23	NODE_47_length_10641_cov_71.525653	4770..5561	Aminoglycoside resistance
aadA1	FY262	NODE_47_length_5968_cov_64.662706	808..1599	Aminoglycoside resistance
aadA1	QH13	NODE_47_length_6995_cov_77.063169	1634..2425	Aminoglycoside resistance
aadA1	SD37	NODE_49_length_15361_cov_111.880856	10000..10791	Aminoglycoside resistance
aadA1	XD1	NODE_49_length_7047_cov_98.535007	4363..5154	Aminoglycoside resistance
aadA1	HUBS5	NODE_49_length_9391_cov_62.763045	3832..4623	Aminoglycoside resistance
aadA1	YN33	NODE_50_length_18710_cov_71.712768	4768..5559	Aminoglycoside resistance
aadA1	HUN101	NODE_50_length_4751_cov_89.949936	1..480	Aminoglycoside resistance
aadA1	S103	NODE_50_length_7125_cov_92.255959	1565..2356	Aminoglycoside resistance
aadA1	HUN39	NODE_50_length_9880_cov_215.847496	4768..5559	Aminoglycoside resistance
aadA1	GX29	NODE_51_length_15361_cov_154.236522	10000..10791	Aminoglycoside resistance
aadA1	HB44	NODE_53_length_11266_cov_107.213513	4538..5329	Aminoglycoside resistance
aadA1	HUBJ30	NODE_53_length_13845_cov_150.352411	7052..7843	Aminoglycoside resistance
aadA1	QH1	NODE_53_length_14663_cov_81.855067	4770..5561	Aminoglycoside resistance
aadA1	CQ4	NODE_53_length_7122_cov_62.198722	1564..2355	Aminoglycoside resistance
aadA1	JX23	NODE_53_length_7193_cov_70.068718	1633..2424	Aminoglycoside resistance
aadA1	HUBJ25	NODE_54_length_11895_cov_142.321374	6003..6794	Aminoglycoside resistance
aadA1	CQ20	NODE_55_length_7122_cov_62.051100	1564..2355	Aminoglycoside resistance
aadA1	HUN92	NODE_55_length_8989_cov_47.529399	3429..4220	Aminoglycoside resistance
aadA1	LN59	NODE_56_length_11265_cov_75.656149	4537..5328	Aminoglycoside resistance
aadA1	LN74	NODE_56_length_15809_cov_62.892067	10249..11040	Aminoglycoside resistance
aadA1	CQ9	NODE_56_length_7122_cov_81.251100	4768..5559	Aminoglycoside resistance
aadA1	HUN129	NODE_56_length_9391_cov_74.372450	4769..5560	Aminoglycoside resistance
aadA1	QH17	NODE_57_length_14663_cov_62.949198	4770..5561	Aminoglycoside resistance
aadA1	HUN108	NODE_57_length_7191_cov_197.978212	4768..5559	Aminoglycoside resistance
aadA1	QH3	NODE_57_length_7193_cov_74.196459	4770..5561	Aminoglycoside resistance
aadA1	SD58	NODE_58_length_14198_cov_79.308618	8842..9633	Aminoglycoside resistance
aadA1	LN75	NODE_58_length_15809_cov_67.251081	10249..11040	Aminoglycoside resistance
aadA1	LN73	NODE_58_length_25539_cov_554.776805	19981..20772	Aminoglycoside resistance
aadA1	GS3	NODE_58_length_5777_cov_82.270877	617..1408	Aminoglycoside resistance
aadA1	SAX32	NODE_58_length_7207_cov_85.020898	1647..2438	Aminoglycoside resistance
aadA1	QH18	NODE_58_length_7893_cov_91.267528	2333..3124	Aminoglycoside resistance
aadA1	GS62	NODE_58_length_9880_cov_69.299092	4768..5559	Aminoglycoside resistance
aadA1	GS78	NODE_58_length_9940_cov_64.116003	4459..5250	Aminoglycoside resistance
aadA1	LN13	NODE_59_length_11265_cov_86.736682	4537..5328	Aminoglycoside resistance
aadA1	LN43	NODE_59_length_5061_cov_79.801364	3393..4184	Aminoglycoside resistance
aadA1	GS191	NODE_59_length_7192_cov_72.141532	4768..5559	Aminoglycoside resistance
aadA1	XD40	NODE_59_length_7193_cov_82.272625	4770..5561	Aminoglycoside resistance
aadA1	GS72	NODE_59_length_9880_cov_70.419565	4322..5113	Aminoglycoside resistance
aadA1	FY228	NODE_60_length_13223_cov_83.828009	642..1433	Aminoglycoside resistance
aadA1	SAX2	NODE_60_length_6768_cov_79.419070	4344..5135	Aminoglycoside resistance
aadA1	JS77	NODE_60_length_7192_cov_83.077020	1633..2424	Aminoglycoside resistance
aadA1	CQ74	NODE_60_length_7649_cov_112.776809	3627..4418	Aminoglycoside resistance
aadA1	XD86	NODE_61_length_11266_cov_132.253642	4538..5329	Aminoglycoside resistance
aadA1	SAX21	NODE_61_length_5646_cov_97.114563	4214..5005	Aminoglycoside resistance
aadA1	QH9	NODE_61_length_6831_cov_104.360379	5958..6749	Aminoglycoside resistance
aadA1	CQ42	NODE_61_length_7193_cov_76.602024	1633..2424	Aminoglycoside resistance
aadA1	GS58	NODE_61_length_9880_cov_70.937060	4322..5113	Aminoglycoside resistance
aadA1	XD23	NODE_62_length_11266_cov_93.620610	4538..5329	Aminoglycoside resistance
aadA1	SH71	NODE_62_length_15972_cov_84.230198	4769..5560	Aminoglycoside resistance
aadA1	QH8	NODE_62_length_6831_cov_76.109713	83..874	Aminoglycoside resistance
aadA1	XD34	NODE_62_length_7193_cov_91.489460	4770..5561	Aminoglycoside resistance
aadA1	S88	NODE_63_length_11171_cov_54.448260	4538..5329	Aminoglycoside resistance
aadA1	S98	NODE_63_length_11171_cov_61.653777	4538..5329	Aminoglycoside resistance
aadA1	S87	NODE_63_length_11171_cov_66.928520	5843..6634	Aminoglycoside resistance
aadA1	JX16	NODE_63_length_12669_cov_111.803447	11237..12028	Aminoglycoside resistance
aadA1	GS133	NODE_63_length_25647_cov_63.003011	20797..21588	Aminoglycoside resistance
aadA1	JX21	NODE_63_length_7193_cov_71.912732	4770..5561	Aminoglycoside resistance
aadA1	GS61	NODE_64_length_13779_cov_114.085535	7052..7843	Aminoglycoside resistance
aadA1	HUNS34	NODE_64_length_7193_cov_57.602164	4770..5561	Aminoglycoside resistance
aadA1	FY216	NODE_64_length_7193_cov_65.207279	4770..5561	Aminoglycoside resistance
aadA1	JX13	NODE_65_length_12723_cov_135.249012	11291..12082	Aminoglycoside resistance
aadA1	CQ48	NODE_65_length_7193_cov_136.909078	1633..2424	Aminoglycoside resistance
aadA1	YN13	NODE_66_length_10683_cov_116.675655	5549..6340	Aminoglycoside resistance
aadA1	S147	NODE_66_length_8753_cov_72.634624	3392..4183	Aminoglycoside resistance
aadA1	SHB6	NODE_66_length_9332_cov_108.566180	1490..2281	Aminoglycoside resistance
aadA1	SX52	NODE_67_length_15809_cov_113.247902	10249..11040	Aminoglycoside resistance
aadA1	S208	NODE_67_length_6172_cov_241.384906	4494..5285	Aminoglycoside resistance
aadA1	HUN103	NODE_68_length_5969_cov_114.245587	4370..5161	Aminoglycoside resistance
aadA1	FY268	NODE_68_length_9004_cov_156.468242	2277..3068	Aminoglycoside resistance
aadA1	HUN113	NODE_69_length_12989_cov_237.175341	7628..8419	Aminoglycoside resistance
aadA1	S192	NODE_69_length_6172_cov_251.877933	888..1679	Aminoglycoside resistance
aadA1	FY253	NODE_69_length_9004_cov_72.778313	2277..3068	Aminoglycoside resistance
aadA1	CQ66	NODE_70_length_16425_cov_109.073648	9804..10595	Aminoglycoside resistance
aadA1	JX42	NODE_71_length_7193_cov_103.991568	1633..2424	Aminoglycoside resistance
aadA1	S181	NODE_71_length_7193_cov_150.998595	1633..2424	Aminoglycoside resistance
aadA1	FY227	NODE_71_length_8978_cov_120.457926	3929..4720	Aminoglycoside resistance
aadA1	GS208	NODE_72_length_611_cov_247.913858	1..611	Aminoglycoside resistance
aadA1	FY229	NODE_72_length_6172_cov_144.249877	888..1679	Aminoglycoside resistance
aadA1	S198	NODE_72_length_6172_cov_288.105332	888..1679	Aminoglycoside resistance
aadA1	CQ3	NODE_72_length_7191_cov_145.784369	1633..2424	Aminoglycoside resistance
aadA1	FY219	NODE_72_length_8978_cov_133.881811	3929..4720	Aminoglycoside resistance
aadA1	SD16	NODE_72_length_9989_cov_61.356739	4571..5362	Aminoglycoside resistance
aadA1	ZJ1	NODE_73_length_11595_cov_136.479597	4933..5724	Aminoglycoside resistance
aadA1	S203	NODE_73_length_13780_cov_102.349923	7052..7843	Aminoglycoside resistance
aadA1	HUN89	NODE_73_length_6732_cov_75.864313	1173..1964	Aminoglycoside resistance
aadA1	S158	NODE_74_length_5967_cov_73.757555	4369..5160	Aminoglycoside resistance
aadA1	GZ40	NODE_74_length_611_cov_192.423221	1..611	Aminoglycoside resistance
aadA1	JX4	NODE_74_length_7193_cov_112.110315	1633..2424	Aminoglycoside resistance
aadA1	HB33	NODE_75_length_5945_cov_361.437457	888..1679	Aminoglycoside resistance
aadA1	HB36	NODE_75_length_5945_cov_361.437457	888..1679	Aminoglycoside resistance
aadA1	XD171	NODE_75_length_5966_cov_63.400238	808..1599	Aminoglycoside resistance
aadA1	CQ79	NODE_75_length_8342_cov_113.687114	4343..5134	Aminoglycoside resistance
aadA1	NMG39	NODE_75_length_8986_cov_82.407678	3627..4418	Aminoglycoside resistance
aadA1	HB50	NODE_76_length_6483_cov_198.114268	1633..2424	Aminoglycoside resistance
aadA1	S212	NODE_77_length_11266_cov_200.911967	4538..5329	Aminoglycoside resistance
aadA1	HUN112	NODE_78_length_14202_cov_177.670584	4570..5361	Aminoglycoside resistance
aadA1	JX40	NODE_78_length_6993_cov_210.835020	1633..2424	Aminoglycoside resistance
aadA1	S104	NODE_79_length_584_cov_404.408284	1..584	Aminoglycoside resistance
aadA1	CQ46	NODE_79_length_7193_cov_120.053120	1633..2424	Aminoglycoside resistance
aadA1	GZ64	NODE_79_length_9683_cov_117.891526	4322..5113	Aminoglycoside resistance
aadA1	SD23	NODE_80_length_8952_cov_47.552901	4770..5561	Aminoglycoside resistance
aadA1	TJ3	NODE_81_length_10094_cov_79.371169	4536..5327	Aminoglycoside resistance
aadA1	JX45	NODE_81_length_584_cov_263.897436	1..584	Aminoglycoside resistance
aadA1	SD7	NODE_81_length_9122_cov_135.133886	3627..4418	Aminoglycoside resistance
aadA1	NMG49	NODE_81_length_9880_cov_98.688055	4768..5559	Aminoglycoside resistance
aadA1	HB64	NODE_82_length_5667_cov_45.128980	58..849	Aminoglycoside resistance
aadA1	HUN20	NODE_82_length_584_cov_262.719921	1..584	Aminoglycoside resistance
aadA1	CQ8	NODE_82_length_7191_cov_75.450098	4768..5559	Aminoglycoside resistance
aadA1	CQ51	NODE_82_length_7193_cov_105.558179	4770..5561	Aminoglycoside resistance
aadA1	HUN105	NODE_82_length_7193_cov_57.186903	4770..5561	Aminoglycoside resistance
aadA1	TJ10	NODE_83_length_10094_cov_88.598283	4768..5559	Aminoglycoside resistance
aadA1	FY237	NODE_83_length_13864_cov_144.418002	8304..9095	Aminoglycoside resistance
aadA1	GX18	NODE_83_length_5967_cov_79.293718	4369..5160	Aminoglycoside resistance
aadA1	NMG50	NODE_83_length_9880_cov_76.873610	4322..5113	Aminoglycoside resistance
aadA1	TJ1	NODE_84_length_10094_cov_65.622841	4536..5327	Aminoglycoside resistance
aadA1	TJ5	NODE_84_length_10094_cov_83.547569	4536..5327	Aminoglycoside resistance
aadA1	XD3	NODE_84_length_4549_cov_47.593918	132..923	Aminoglycoside resistance
aadA1	SD1	NODE_84_length_5076_cov_89.760152	807..1598	Aminoglycoside resistance
aadA1	TJ17	NODE_85_length_10094_cov_101.928921	4768..5559	Aminoglycoside resistance
aadA1	TJ15	NODE_85_length_10094_cov_103.062693	4768..5559	Aminoglycoside resistance
aadA1	TJ12	NODE_85_length_10094_cov_88.013876	4768..5559	Aminoglycoside resistance
aadA1	FY187	NODE_85_length_10260_cov_77.643916	3627..4418	Aminoglycoside resistance
aadA1	ZJ29	NODE_85_length_5059_cov_132.949819	642..1433	Aminoglycoside resistance
aadA1	TJ8	NODE_86_length_10094_cov_106.228611	4768..5559	Aminoglycoside resistance
aadA1	SH60	NODE_86_length_10449_cov_76.230139	4557..5348	Aminoglycoside resistance
aadA1	GS8	NODE_86_length_2554_cov_92.316512	130..921	Aminoglycoside resistance
aadA1	SHB15	NODE_86_length_3327_cov_139.906769	1894..2685	Aminoglycoside resistance
aadA1	S51	NODE_86_length_584_cov_271.465483	1..584	Aminoglycoside resistance
aadA1	S193	NODE_86_length_584_cov_437.859961	1..584	Aminoglycoside resistance
aadA1	SH48	NODE_87_length_10449_cov_41.779213	5102..5893	Aminoglycoside resistance
aadA1	AH29	NODE_87_length_11266_cov_71.303602	4538..5329	Aminoglycoside resistance
aadA1	GZ34	NODE_87_length_5754_cov_128.745640	642..1433	Aminoglycoside resistance
aadA1	XD2	NODE_89_length_584_cov_186.420118	1..584	Aminoglycoside resistance
aadA1	FJ26	NODE_90_length_2187_cov_63.368720	1168..1959	Aminoglycoside resistance
aadA1	FJ38	NODE_91_length_2187_cov_75.446919	229..1020	Aminoglycoside resistance
aadA1	S182	NODE_92_length_6480_cov_137.363580	1120..1911	Aminoglycoside resistance
aadA1	S200	NODE_92_length_6480_cov_155.828206	4570..5361	Aminoglycoside resistance
aadA1	FY248	NODE_92_length_9950_cov_45.616935	4088..4879	Aminoglycoside resistance
aadA1	NMG47	NODE_93_length_9880_cov_63.906151	4322..5113	Aminoglycoside resistance
aadA1	HUBJ22	NODE_94_length_10463_cov_98.421336	5102..5893	Aminoglycoside resistance
aadA1	S210	NODE_95_length_6480_cov_183.094018	4570..5361	Aminoglycoside resistance
aadA1	CQ77	NODE_97_length_11266_cov_87.655108	5938..6729	Aminoglycoside resistance
aadA1	HUN115	NODE_98_length_611_cov_451.692884	1..611	Aminoglycoside resistance
aadA1	QH12	NODE_98_length_7193_cov_83.907532	4770..5561	Aminoglycoside resistance
aadA1	S95	NODE_99_length_584_cov_345.487179	1..584	Aminoglycoside resistance
aadA1	HUN4	NODE_99_length_584_cov_346.305720	1..584	Aminoglycoside resistance
aadA1	QH5	NODE_99_length_7891_cov_91.841566	4768..5559	Aminoglycoside resistance
aadA16	XJ26	NODE_42_length_8094_cov_184.596981	4691..5536	Aminoglycoside resistance
aadA16	CQ31	NODE_43_length_12163_cov_152.804402	3280..4125	Aminoglycoside resistance
aadA16	XJ33	NODE_43_length_8094_cov_122.481103	2559..3404	Aminoglycoside resistance
aadA16	XJ36	NODE_43_length_8094_cov_132.106648	4691..5536	Aminoglycoside resistance
aadA16	GZ12	NODE_48_length_6514_cov_91.292994	2119..2964	Aminoglycoside resistance
aadA16	AH28	NODE_49_length_7654_cov_108.173288	4691..5536	Aminoglycoside resistance
aadA16	LN43	NODE_55_length_10088_cov_98.926381	1584..2429	Aminoglycoside resistance
aadA16	GS100	NODE_58_length_16615_cov_132.267082	13323..14168	Aminoglycoside resistance
aadA16	XJ35	NODE_63_length_6746_cov_131.134353	2349..3194	Aminoglycoside resistance
aadA16	HUNS46	NODE_64_length_7634_cov_83.044065	3425..4270	Aminoglycoside resistance
aadA16	SAX6	NODE_92_length_3047_cov_81.607071	83..928	Aminoglycoside resistance
aadA17	S56	NODE_109_length_1991_cov_111.083072	1119..1910	Aminoglycoside resistance
aadA17	HB29	NODE_110_length_2433_cov_83.846350	1117..1908	Aminoglycoside resistance
aadA17	AH96	NODE_54_length_1994_cov_123.456442	1120..1911	Aminoglycoside resistance
aadA17	HUN92	NODE_55_length_8989_cov_47.529399	1024..1815	Aminoglycoside resistance
aadA17	XJ33	NODE_57_length_1632_cov_81.612219	1..513	Aminoglycoside resistance
aadA17	XJ26	NODE_58_length_1631_cov_91.373230	1119..1631	Aminoglycoside resistance
aadA17	XJ36	NODE_58_length_1632_cov_68.899678	1..513	Aminoglycoside resistance
aadA17	JX26	NODE_60_length_2433_cov_70.805603	1120..1911	Aminoglycoside resistance
aadA17	JX25	NODE_91_length_2433_cov_79.665112	1120..1911	Aminoglycoside resistance
aadA2	XD35	3 length=119611 depth=1.19x	78944..79735	Aminoglycoside resistance
aadA2	XD100	E_coli_RXD100_ctg0059 Escherichia coli ATCC 25922	7255..8046	Aminoglycoside resistance
aadA2	XD115	E_coli_RXD115_ctg0082 Escherichia coli ATCC 25922	3089..3880	Aminoglycoside resistance
aadA2	HB30	NODE_101_length_5002_cov_58.233096	1634..2425	Aminoglycoside resistance
aadA2	GS191	NODE_101_length_642_cov_207.339823	58..642	Aminoglycoside resistance
aadA2	FY209	NODE_102_length_5420_cov_113.081041	1802..2593	Aminoglycoside resistance
aadA2	FY74	NODE_104_length_3606_cov_121.614055	1829..2620	Aminoglycoside resistance
aadA2	SD12	NODE_104_length_3836_cov_139.509444	1829..2620	Aminoglycoside resistance
aadA2	XJ17	NODE_107_length_4080_cov_360.606795	1609..2400	Aminoglycoside resistance
aadA2	ZJ20	NODE_107_length_5973_cov_84.147049	3266..4057	Aminoglycoside resistance
aadA2	XJ13	NODE_107_length_642_cov_242.773451	58..642	Aminoglycoside resistance
aadA2	XJ9	NODE_109_length_642_cov_223.493805	58..642	Aminoglycoside resistance
aadA2	XJ12	NODE_110_length_642_cov_245.732743	1..585	Aminoglycoside resistance
aadA2	XJ4	NODE_113_length_642_cov_192.460177	1..585	Aminoglycoside resistance
aadA2	GZ10	NODE_115_length_2504_cov_111.662134	726..1517	Aminoglycoside resistance
aadA2	HUN11	NODE_115_length_2656_cov_127.126018	156..947	Aminoglycoside resistance
aadA2	HB4	NODE_115_length_3413_cov_47.302758	1634..2425	Aminoglycoside resistance
aadA2	SD5	NODE_117_length_11651_cov_157.153966	2518..3309	Aminoglycoside resistance
aadA2	HUN84	NODE_117_length_2720_cov_98.996216	708..1499	Aminoglycoside resistance
aadA2	AH15	NODE_119_length_11868_cov_74.248579	2697..3488	Aminoglycoside resistance
aadA2	HUN7	NODE_119_length_2355_cov_159.184372	343..1134	Aminoglycoside resistance
aadA2	HUN58	NODE_120_length_2656_cov_109.662272	156..947	Aminoglycoside resistance
aadA2	JX18	NODE_127_length_3607_cov_188.817280	988..1779	Aminoglycoside resistance
aadA2	HB50	NODE_131_length_860_cov_431.241379	11..802	Aminoglycoside resistance
aadA2	HUN8	NODE_134_length_2121_cov_121.719667	988..1779	Aminoglycoside resistance
aadA2	CQ69	NODE_134_length_516_cov_361.774487	1..516	Aminoglycoside resistance
aadA2	HLJ34	NODE_137_length_1752_cov_214.620299	1..589	Aminoglycoside resistance
aadA2	GZ31	NODE_141_length_2050_cov_88.147491	1104..1895	Aminoglycoside resistance
aadA2	HUN128	NODE_150_length_2361_cov_67.709720	1217..2008	Aminoglycoside resistance
aadA2	FY45	NODE_151_length_782_cov_417.537589	64..782	Aminoglycoside resistance
aadA2	HUN75	NODE_153_length_2602_cov_86.778614	1104..1895	Aminoglycoside resistance
aadA2	FY256	NODE_153_length_642_cov_210.776991	1..585	Aminoglycoside resistance
aadA2	XD116	NODE_24_length_68031_cov_102.331872	60265..61056	Aminoglycoside resistance
aadA2	FY251	NODE_242_length_642_cov_175.244248	1..585	Aminoglycoside resistance
aadA2	HN15	NODE_25_length_21378_cov_73.237829	14873..15664	Aminoglycoside resistance
aadA2	FY119	NODE_25_length_68031_cov_120.122936	60265..61056	Aminoglycoside resistance
aadA2	FY252	NODE_260_length_1909_cov_4.995633	989..1780	Aminoglycoside resistance
aadA2	AH90	NODE_27_length_27072_cov_121.931024	6437..7228	Aminoglycoside resistance
aadA2	CQ67	NODE_27_length_68393_cov_114.716304	60265..61056	Aminoglycoside resistance
aadA2	AH20	NODE_28_length_50760_cov_209.184066	47433..48224	Aminoglycoside resistance
aadA2	XD38	NODE_29_length_11266_cov_81.952811	8343..9134	Aminoglycoside resistance
aadA2	AH11	NODE_29_length_51122_cov_233.651445	47795..48586	Aminoglycoside resistance
aadA2	AH22	NODE_29_length_51166_cov_129.178081	47839..48630	Aminoglycoside resistance
aadA2	S99	NODE_31_length_11264_cov_151.926790	2132..2923	Aminoglycoside resistance
aadA2	SAX35	NODE_32_length_11284_cov_140.935844	7707..8498	Aminoglycoside resistance
aadA2	SAX15	NODE_32_length_44345_cov_97.998102	8551..9342	Aminoglycoside resistance
aadA2	LN44	NODE_34_length_42770_cov_79.093739	8342..9133	Aminoglycoside resistance
aadA2	AH88	NODE_37_length_2164_cov_272.571634	132..923	Aminoglycoside resistance
aadA2	AH47	NODE_38_length_11162_cov_89.492287	2136..2927	Aminoglycoside resistance
aadA2	GS33	NODE_38_length_15624_cov_124.695697	7175..7966	Aminoglycoside resistance
aadA2	CQ15	NODE_38_length_15807_cov_59.681818	7844..8635	Aminoglycoside resistance
aadA2	AH1	NODE_38_length_5754_cov_102.103224	3047..3838	Aminoglycoside resistance
aadA2	GS34	NODE_39_length_15623_cov_57.590763	7659..8450	Aminoglycoside resistance
aadA2	GS35	NODE_39_length_15623_cov_72.455744	7174..7965	Aminoglycoside resistance
aadA2	CQ17	NODE_39_length_15807_cov_60.785823	7844..8635	Aminoglycoside resistance
aadA2	XD39	NODE_41_length_23914_cov_64.536099	7173..7964	Aminoglycoside resistance
aadA2	GZ12	NODE_43_length_10025_cov_45.418778	8248..9039	Aminoglycoside resistance
aadA2	HUBS37	NODE_44_length_6828_cov_207.655033	3981..4772	Aminoglycoside resistance
aadA2	SH52	NODE_45_length_7950_cov_125.271434	1222..2013	Aminoglycoside resistance
aadA2	HB61	NODE_46_length_35392_cov_101.263514	26004..26795	Aminoglycoside resistance
aadA2	HUBS36	NODE_46_length_6828_cov_81.723244	2057..2848	Aminoglycoside resistance
aadA2	AH48	NODE_46_length_8274_cov_103.206539	4437..5228	Aminoglycoside resistance
aadA2	AH28	NODE_46_length_9185_cov_82.305007	7173..7964	Aminoglycoside resistance
aadA2	HB23	NODE_47_length_10641_cov_71.525653	7175..7966	Aminoglycoside resistance
aadA2	NMG22	NODE_48_length_11914_cov_121.560953	2046..2837	Aminoglycoside resistance
aadA2	SD37	NODE_49_length_15361_cov_111.880856	7595..8386	Aminoglycoside resistance
aadA2	HUBS5	NODE_49_length_9391_cov_62.763045	1427..2218	Aminoglycoside resistance
aadA2	HUBJ8	NODE_49_length_9542_cov_118.711041	908..1699	Aminoglycoside resistance
aadA2	YN33	NODE_50_length_18710_cov_71.712768	7173..7964	Aminoglycoside resistance
aadA2	HB24	NODE_50_length_6349_cov_45.703125	4570..5361	Aminoglycoside resistance
aadA2	SH56	NODE_50_length_7950_cov_115.895466	1222..2013	Aminoglycoside resistance
aadA2	HUN39	NODE_50_length_9880_cov_215.847496	7173..7964	Aminoglycoside resistance
aadA2	GX29	NODE_51_length_15361_cov_154.236522	7595..8386	Aminoglycoside resistance
aadA2	HB44	NODE_53_length_11266_cov_107.213513	2133..2924	Aminoglycoside resistance
aadA2	HUBJ30	NODE_53_length_13845_cov_150.352411	4647..5438	Aminoglycoside resistance
aadA2	QH1	NODE_53_length_14663_cov_81.855067	7175..7966	Aminoglycoside resistance
aadA2	HB53	NODE_53_length_25833_cov_86.379640	23407..24198	Aminoglycoside resistance
aadA2	CQ10	NODE_53_length_3607_cov_82.045892	988..1779	Aminoglycoside resistance
aadA2	JX45	NODE_53_length_3841_cov_104.759299	1829..2620	Aminoglycoside resistance
aadA2	HUBJ25	NODE_54_length_11895_cov_142.321374	8408..9199	Aminoglycoside resistance
aadA2	S72	NODE_54_length_3844_cov_146.142023	1829..2620	Aminoglycoside resistance
aadA2	LN59	NODE_56_length_11265_cov_75.656149	2132..2923	Aminoglycoside resistance
aadA2	LN74	NODE_56_length_15809_cov_62.892067	7844..8635	Aminoglycoside resistance
aadA2	HUN129	NODE_56_length_9391_cov_74.372450	7174..7965	Aminoglycoside resistance
aadA2	QH17	NODE_57_length_14663_cov_62.949198	7175..7966	Aminoglycoside resistance
aadA2	JX38	NODE_57_length_1996_cov_86.171443	1147..1938	Aminoglycoside resistance
aadA2	SD58	NODE_58_length_14198_cov_79.308618	6437..7228	Aminoglycoside resistance
aadA2	LN75	NODE_58_length_15809_cov_67.251081	7844..8635	Aminoglycoside resistance
aadA2	LN73	NODE_58_length_25539_cov_554.776805	17576..18367	Aminoglycoside resistance
aadA2	QH18	NODE_58_length_7893_cov_91.267528	1..719	Aminoglycoside resistance
aadA2	GS62	NODE_58_length_9880_cov_69.299092	7173..7964	Aminoglycoside resistance
aadA2	GS78	NODE_58_length_9940_cov_64.116003	2054..2845	Aminoglycoside resistance
aadA2	LN13	NODE_59_length_11265_cov_86.736682	2132..2923	Aminoglycoside resistance
aadA2	LN43	NODE_59_length_5061_cov_79.801364	988..1779	Aminoglycoside resistance
aadA2	GS72	NODE_59_length_9880_cov_70.419565	1917..2708	Aminoglycoside resistance
aadA2	FY228	NODE_60_length_13223_cov_83.828009	3047..3838	Aminoglycoside resistance
aadA2	S78	NODE_60_length_3844_cov_120.511548	1829..2620	Aminoglycoside resistance
aadA2	CQ74	NODE_60_length_7649_cov_112.776809	1222..2013	Aminoglycoside resistance
aadA2	XD86	NODE_61_length_11266_cov_132.253642	2133..2924	Aminoglycoside resistance
aadA2	S182	NODE_61_length_23745_cov_153.268168	1636..2427	Aminoglycoside resistance
aadA2	S200	NODE_61_length_23745_cov_170.246704	21319..22110	Aminoglycoside resistance
aadA2	SAX21	NODE_61_length_5646_cov_97.114563	1809..2600	Aminoglycoside resistance
aadA2	GS58	NODE_61_length_9880_cov_70.937060	1917..2708	Aminoglycoside resistance
aadA2	XD23	NODE_62_length_11266_cov_93.620610	2133..2924	Aminoglycoside resistance
aadA2	SH71	NODE_62_length_15972_cov_84.230198	7174..7965	Aminoglycoside resistance
aadA2	NMG25	NODE_62_length_4618_cov_72.267562	2218..3009	Aminoglycoside resistance
aadA2	AH9	NODE_63_length_10430_cov_153.852893	1933..2724	Aminoglycoside resistance
aadA2	S88	NODE_63_length_11171_cov_54.448260	2133..2924	Aminoglycoside resistance
aadA2	S98	NODE_63_length_11171_cov_61.653777	2133..2924	Aminoglycoside resistance
aadA2	S87	NODE_63_length_11171_cov_66.928520	8248..9039	Aminoglycoside resistance
aadA2	JX16	NODE_63_length_12669_cov_111.803447	8832..9623	Aminoglycoside resistance
aadA2	GS133	NODE_63_length_25647_cov_63.003011	18392..19183	Aminoglycoside resistance
aadA2	HUN24	NODE_63_length_2889_cov_162.500000	1943..2734	Aminoglycoside resistance
aadA2	HUBS21	NODE_63_length_5972_cov_132.402714	1710..2501	Aminoglycoside resistance
aadA2	GS61	NODE_64_length_13779_cov_114.085535	4647..5438	Aminoglycoside resistance
aadA2	HUN4	NODE_64_length_2843_cov_124.386117	343..1134	Aminoglycoside resistance
aadA2	GS16	NODE_64_length_6989_cov_137.228588	1628..2419	Aminoglycoside resistance
aadA2	NX28	NODE_65_length_12122_cov_1307.216355	4051..4842	Aminoglycoside resistance
aadA2	JX13	NODE_65_length_12723_cov_135.249012	8886..9677	Aminoglycoside resistance
aadA2	CQ20	NODE_66_length_2896_cov_73.956013	1119..1910	Aminoglycoside resistance
aadA2	S147	NODE_66_length_8753_cov_72.634624	987..1778	Aminoglycoside resistance
aadA2	SHB6	NODE_66_length_9332_cov_108.566180	3895..4686	Aminoglycoside resistance
aadA2	SX52	NODE_67_length_15809_cov_113.247902	7844..8635	Aminoglycoside resistance
aadA2	S103	NODE_67_length_2896_cov_116.962043	987..1778	Aminoglycoside resistance
aadA2	HUN111	NODE_67_length_7266_cov_199.769231	4647..5438	Aminoglycoside resistance
aadA2	FY268	NODE_68_length_9004_cov_156.468242	1..663	Aminoglycoside resistance
aadA2	HUN113	NODE_69_length_12989_cov_237.175341	5223..6014	Aminoglycoside resistance
aadA2	FY48	NODE_69_length_8016_cov_84.094470	1104..1897	Aminoglycoside resistance
aadA2	FY253	NODE_69_length_9004_cov_72.778313	1..663	Aminoglycoside resistance
aadA2	CQ66	NODE_70_length_16425_cov_109.073648	7399..8190	Aminoglycoside resistance
aadA2	FY230	NODE_70_length_3841_cov_140.701647	1829..2620	Aminoglycoside resistance
aadA2	XJ32	NODE_70_length_6750_cov_120.918328	1222..2013	Aminoglycoside resistance
aadA2	FY227	NODE_71_length_8978_cov_120.457926	1524..2315	Aminoglycoside resistance
aadA2	S210	NODE_72_length_16548_cov_213.267258	1636..2427	Aminoglycoside resistance
aadA2	GS4	NODE_72_length_4621_cov_120.570423	2221..3012	Aminoglycoside resistance
aadA2	FY219	NODE_72_length_8978_cov_133.881811	1524..2315	Aminoglycoside resistance
aadA2	SD16	NODE_72_length_9989_cov_61.356739	6976..7767	Aminoglycoside resistance
aadA2	ZJ1	NODE_73_length_11595_cov_136.479597	7338..8129	Aminoglycoside resistance
aadA2	S203	NODE_73_length_13780_cov_102.349923	4647..5438	Aminoglycoside resistance
aadA2	CQ4	NODE_73_length_1837_cov_82.478977	1..719	Aminoglycoside resistance
aadA2	HUN105	NODE_73_length_9437_cov_82.787179	59..850	Aminoglycoside resistance
aadA2	CQ27	NODE_75_length_3841_cov_123.424814	1829..2620	Aminoglycoside resistance
aadA2	HUNS33	NODE_75_length_8215_cov_109.849594	4862..5653	Aminoglycoside resistance
aadA2	CQ79	NODE_75_length_8342_cov_113.687114	6748..7539	Aminoglycoside resistance
aadA2	NMG39	NODE_75_length_8986_cov_82.407678	1222..2013	Aminoglycoside resistance
aadA2	QH4	NODE_76_length_17863_cov_88.884010	1120..1911	Aminoglycoside resistance
aadA2	S52	NODE_76_length_4785_cov_129.699660	907..1698	Aminoglycoside resistance
aadA2	HUBS24	NODE_76_length_8215_cov_81.809290	2563..3354	Aminoglycoside resistance
aadA2	S212	NODE_77_length_11266_cov_200.911967	2133..2924	Aminoglycoside resistance
aadA2	QH13	NODE_77_length_642_cov_172.950442	1..585	Aminoglycoside resistance
aadA2	NMG10	NODE_77_length_648_cov_217.429072	1..585	Aminoglycoside resistance
aadA2	XJ15	NODE_77_length_6979_cov_137.512025	2131..2922	Aminoglycoside resistance
aadA2	HUN112	NODE_78_length_14202_cov_177.670584	6975..7766	Aminoglycoside resistance
aadA2	GZ55	NODE_78_length_1811_cov_114.911188	988..1779	Aminoglycoside resistance
aadA2	S205	NODE_78_length_2355_cov_199.068042	1222..2013	Aminoglycoside resistance
aadA2	SD40	NODE_78_length_5909_cov_114.779150	2045..2836	Aminoglycoside resistance
aadA2	AH37	NODE_79_length_3389_cov_121.700181	989..1780	Aminoglycoside resistance
aadA2	LN32	NODE_79_length_8903_cov_131.385225	1677..2468	Aminoglycoside resistance
aadA2	GZ64	NODE_79_length_9683_cov_117.891526	1917..2708	Aminoglycoside resistance
aadA2	HUN14	NODE_80_length_2889_cov_146.979730	1943..2734	Aminoglycoside resistance
aadA2	SD23	NODE_80_length_8952_cov_47.552901	7175..7966	Aminoglycoside resistance
aadA2	TJ3	NODE_81_length_10094_cov_79.371169	2131..2922	Aminoglycoside resistance
aadA2	SC10	NODE_81_length_2919_cov_129.609782	907..1698	Aminoglycoside resistance
aadA2	SD7	NODE_81_length_9122_cov_135.133886	1222..2013	Aminoglycoside resistance
aadA2	NMG49	NODE_81_length_9880_cov_98.688055	7173..7964	Aminoglycoside resistance
aadA2	CQ2	NODE_82_length_3841_cov_93.489107	1222..2013	Aminoglycoside resistance
aadA2	HUN83	NODE_82_length_5836_cov_144.356486	4058..4849	Aminoglycoside resistance
aadA2	LN10	NODE_82_length_8903_cov_131.621686	1677..2468	Aminoglycoside resistance
aadA2	TJ10	NODE_83_length_10094_cov_88.598283	7173..7964	Aminoglycoside resistance
aadA2	FY237	NODE_83_length_13864_cov_144.418002	5899..6690	Aminoglycoside resistance
aadA2	AH10	NODE_83_length_3389_cov_95.197464	989..1780	Aminoglycoside resistance
aadA2	XJ48	NODE_83_length_6350_cov_111.175355	4571..5362	Aminoglycoside resistance
aadA2	NMG50	NODE_83_length_9880_cov_76.873610	1917..2708	Aminoglycoside resistance
aadA2	TJ1	NODE_84_length_10094_cov_65.622841	2131..2922	Aminoglycoside resistance
aadA2	TJ5	NODE_84_length_10094_cov_83.547569	2131..2922	Aminoglycoside resistance
aadA2	GS8	NODE_84_length_2765_cov_379.713914	58..849	Aminoglycoside resistance
aadA2	LN42	NODE_84_length_4328_cov_135.903552	1829..2620	Aminoglycoside resistance
aadA2	XD3	NODE_84_length_4549_cov_47.593918	2537..3328	Aminoglycoside resistance
aadA2	TJ17	NODE_85_length_10094_cov_101.928921	7173..7964	Aminoglycoside resistance
aadA2	TJ15	NODE_85_length_10094_cov_103.062693	7173..7964	Aminoglycoside resistance
aadA2	TJ12	NODE_85_length_10094_cov_88.013876	7173..7964	Aminoglycoside resistance
aadA2	FY187	NODE_85_length_10260_cov_77.643916	1222..2013	Aminoglycoside resistance
aadA2	AH8	NODE_85_length_3389_cov_106.883454	989..1780	Aminoglycoside resistance
aadA2	SD2	NODE_85_length_3634_cov_75.291257	1622..2413	Aminoglycoside resistance
aadA2	HUN49	NODE_85_length_4388_cov_148.188587	1681..2472	Aminoglycoside resistance
aadA2	ZJ29	NODE_85_length_5059_cov_132.949819	3047..3838	Aminoglycoside resistance
aadA2	TJ8	NODE_86_length_10094_cov_106.228611	7173..7964	Aminoglycoside resistance
aadA2	SH60	NODE_86_length_10449_cov_76.230139	6962..7753	Aminoglycoside resistance
aadA2	FY241	NODE_86_length_3693_cov_107.448285	1681..2472	Aminoglycoside resistance
aadA2	SH48	NODE_87_length_10449_cov_41.779213	2697..3488	Aminoglycoside resistance
aadA2	AH29	NODE_87_length_11266_cov_71.303602	2133..2924	Aminoglycoside resistance
aadA2	SAX22	NODE_87_length_2018_cov_384.154044	64..855	Aminoglycoside resistance
aadA2	SC3	NODE_87_length_2919_cov_104.423997	1222..2013	Aminoglycoside resistance
aadA2	GZ34	NODE_87_length_5754_cov_128.745640	3047..3838	Aminoglycoside resistance
aadA2	XJ40	NODE_87_length_648_cov_139.698774	1..585	Aminoglycoside resistance
aadA2	CQ92	NODE_88_length_2993_cov_99.507202	1222..2013	Aminoglycoside resistance
aadA2	SD1	NODE_88_length_3443_cov_74.852050	988..1779	Aminoglycoside resistance
aadA2	HUNS34	NODE_89_length_1996_cov_78.879104	1147..1938	Aminoglycoside resistance
aadA2	XJ5	NODE_89_length_4621_cov_77.933759	2221..3012	Aminoglycoside resistance
aadA2	XJ49	NODE_89_length_5840_cov_76.526635	4062..4853	Aminoglycoside resistance
aadA2	GS123	NODE_90_length_4622_cov_103.738394	2222..3013	Aminoglycoside resistance
aadA2	CQ12	NODE_91_length_3841_cov_96.608395	1829..2620	Aminoglycoside resistance
aadA2	NMG47	NODE_93_length_9880_cov_63.906151	1917..2708	Aminoglycoside resistance
aadA2	HUBJ22	NODE_94_length_10463_cov_98.421336	2697..3488	Aminoglycoside resistance
aadA2	JX12	NODE_94_length_3265_cov_154.335320	343..1134	Aminoglycoside resistance
aadA2	YN34	NODE_95_length_2343_cov_349.460282	1681..2343	Aminoglycoside resistance
aadA2	GS93	NODE_95_length_3574_cov_82.858164	1801..2592	Aminoglycoside resistance
aadA2	GS138	NODE_96_length_4581_cov_183.560835	1866..2657	Aminoglycoside resistance
aadA2	CQ77	NODE_97_length_11266_cov_87.655108	8343..9134	Aminoglycoside resistance
aadA2	S211	NODE_99_length_3844_cov_110.887709	1225..2016	Aminoglycoside resistance
aadA2	QH5	NODE_99_length_7891_cov_91.841566	7173..7891	Aminoglycoside resistance
aadA22	XD35	2 length=244138 depth=1.09x circular=true	96351..97142	Aminoglycoside resistance
aadA22	TJ	NODE_100_length_1028_cov_125.487907	130..921	Aminoglycoside resistance
aadA22	XJ13	NODE_101_length_922_cov_103.728994	1..719	Aminoglycoside resistance
aadA22	XJ9	NODE_103_length_922_cov_89.327811	204..922	Aminoglycoside resistance
aadA22	AH10	NODE_104_length_848_cov_79.282750	1..719	Aminoglycoside resistance
aadA22	XJ12	NODE_104_length_921_cov_115.728673	203..921	Aminoglycoside resistance
aadA22	XJ4	NODE_105_length_921_cov_76.723934	1..719	Aminoglycoside resistance
aadA22	AH8	NODE_106_length_848_cov_82.731518	1..719	Aminoglycoside resistance
aadA22	FY48	NODE_110_length_945_cov_77.754608	227..945	Aminoglycoside resistance
aadA22	GS86	NODE_111_length_2032_cov_90.480818	1118..1909	Aminoglycoside resistance
aadA22	GS85	NODE_111_length_2032_cov_90.480818	1118..1909	Aminoglycoside resistance
aadA22	HB38	NODE_111_length_848_cov_51.848249	130..848	Aminoglycoside resistance
aadA22	NMG32	NODE_113_length_2111_cov_87.265487	203..994	Aminoglycoside resistance
aadA22	HB22	NODE_122_length_2352_cov_55.749451	1..719	Aminoglycoside resistance
aadA22	S56	NODE_126_length_642_cov_90.265487	130..642	Aminoglycoside resistance
aadA22	NMG7	NODE_128_length_1334_cov_80.858393	316..1107	Aminoglycoside resistance
aadA22	XJ48	NODE_129_length_848_cov_102.027237	1..719	Aminoglycoside resistance
aadA22	HB4	NODE_129_length_848_cov_36.453956	130..848	Aminoglycoside resistance
aadA22	NMG46	NODE_131_length_2932_cov_93.136252	1024..1815	Aminoglycoside resistance
aadA22	HB30	NODE_132_length_848_cov_41.403372	130..848	Aminoglycoside resistance
aadA22	HB11	NODE_143_length_1102_cov_67.925854	85..876	Aminoglycoside resistance
aadA22	HB17	NODE_147_length_1101_cov_62.092773	84..875	Aminoglycoside resistance
aadA22	HB6	NODE_159_length_2697_cov_55.373664	1678..2469	Aminoglycoside resistance
aadA22	S77	NODE_40_length_6965_cov_222.831736	1584..2375	Aminoglycoside resistance
aadA22	HB24	NODE_44_length_10206_cov_58.885280	7706..8497	Aminoglycoside resistance
aadA22	NMG5	NODE_45_length_1990_cov_66.492420	1118..1909	Aminoglycoside resistance
aadA22	NMG8	NODE_47_length_1990_cov_78.770518	82..873	Aminoglycoside resistance
aadA22	NMG3	NODE_47_length_1992_cov_74.149347	1120..1911	Aminoglycoside resistance
aadA22	SH59	NODE_50_length_1678_cov_235.283573	316..1107	Aminoglycoside resistance
aadA22	NMG9	NODE_50_length_1992_cov_108.795822	1120..1911	Aminoglycoside resistance
aadA22	SH55	NODE_51_length_1678_cov_197.972517	572..1363	Aminoglycoside resistance
aadA22	SH47	NODE_53_length_1678_cov_153.632105	572..1363	Aminoglycoside resistance
aadA22	SH53	NODE_53_length_1678_cov_214.670831	572..1363	Aminoglycoside resistance
aadA22	HB42	NODE_56_length_3372_cov_58.451897	1593..2384	Aminoglycoside resistance
aadA22	SH57	NODE_59_length_1677_cov_193.121250	316..1107	Aminoglycoside resistance
aadA22	HUN27	NODE_61_length_2224_cov_101.462506	1118..1909	Aminoglycoside resistance
aadA22	HUN29	NODE_61_length_2224_cov_93.186306	316..1107	Aminoglycoside resistance
aadA22	XJ40	NODE_61_length_2629_cov_72.879702	130..921	Aminoglycoside resistance
aadA22	LN36	NODE_62_length_1992_cov_78.553003	84..875	Aminoglycoside resistance
aadA22	HB3	NODE_62_length_1995_cov_60.525026	1120..1911	Aminoglycoside resistance
aadA22	HUN19	NODE_64_length_1335_cov_101.256757	316..1107	Aminoglycoside resistance
aadA22	FY261	NODE_64_length_2932_cov_85.687916	1118..1909	Aminoglycoside resistance
aadA22	NMG29	NODE_66_length_2111_cov_96.883972	203..994	Aminoglycoside resistance
aadA22	FY257	NODE_69_length_2929_cov_161.847826	1021..1812	Aminoglycoside resistance
aadA22	NMG10	NODE_69_length_848_cov_97.007782	1..719	Aminoglycoside resistance
aadA22	FY267	NODE_72_length_2932_cov_90.464098	1024..1815	Aminoglycoside resistance
aadA22	SH50	NODE_75_length_1678_cov_248.348532	572..1363	Aminoglycoside resistance
aadA22	GZ18	NODE_77_length_2933_cov_56.557073	1119..1910	Aminoglycoside resistance
aadA22	SH52	NODE_77_length_848_cov_63.408560	130..848	Aminoglycoside resistance
aadA22	SH46	NODE_78_length_1678_cov_287.690818	572..1363	Aminoglycoside resistance
aadA22	GS82	NODE_79_length_2221_cov_111.943563	1118..1909	Aminoglycoside resistance
aadA22	SH56	NODE_81_length_848_cov_75.357977	130..848	Aminoglycoside resistance
aadA22	HB45	NODE_87_length_2930_cov_82.468630	1022..1813	Aminoglycoside resistance
aadA22	JX10	NODE_89_length_1836_cov_51.160318	1118..1836	Aminoglycoside resistance
aadA22	S195	NODE_91_length_2224_cov_122.012110	1118..1909	Aminoglycoside resistance
aadA22	XJ15	NODE_94_length_1992_cov_160.127937	1119..1910	Aminoglycoside resistance
aadA22	XD37	NODE_95_length_1991_cov_100.514107	1118..1909	Aminoglycoside resistance
aadA22	S206	NODE_95_length_1993_cov_144.702505	1118..1909	Aminoglycoside resistance
aadA22	SH51	NODE_96_length_1674_cov_572.128125	571..1362	Aminoglycoside resistance
aadA22	GS86	NODE_97_length_2111_cov_130.433628	203..994	Aminoglycoside resistance
aadA22	AH37	NODE_97_length_848_cov_110.024643	1..719	Aminoglycoside resistance
aadA22	HB13	NODE_99_length_1105_cov_48.524319	85..876	Aminoglycoside resistance
aadA22	FY183	NODE_99_length_1993_cov_91.471294	85..876	Aminoglycoside resistance
aadA23	AH40	NODE_108_length_913_cov_121.443780	130..909	Aminoglycoside resistance
aadA23	AH4	NODE_113_length_913_cov_121.135167	130..909	Aminoglycoside resistance
aadA23	AH27	NODE_119_length_913_cov_115.169856	5..784	Aminoglycoside resistance
aadA23	AH16	NODE_130_length_913_cov_129.148325	5..784	Aminoglycoside resistance
aadA23	FY45	NODE_140_length_1009_cov_348.554721	226..1005	Aminoglycoside resistance
aadA24	NMG12	NODE_78_length_9904_cov_124.753333	1519..2298	Aminoglycoside resistance
aadA24	AH13	NODE_97_length_4819_cov_148.337832	2522..3301	Aminoglycoside resistance
aadA2b	XD35	2 length=244138 depth=1.09x circular=true	117235..118014	Aminoglycoside resistance
aadA2b	E_coli_RXD10	E_coli_RXD10_ctg0107 Escherichia coli ATCC 25922	1879..2658	Aminoglycoside resistance
aadA2b	XD11	E_coli_RXD11_ctg0127 Escherichia coli ATCC 25922	1879..2658	Aminoglycoside resistance
aadA2b	XD12	E_coli_RXD12_ctg0092 Escherichia coli ATCC 25922	1863..2642	Aminoglycoside resistance
aadA2b	XD20	E_coli_RXD20_ctg0091 Escherichia coli ATCC 25922	1863..2642	Aminoglycoside resistance
aadA2b	XD24	E_coli_RXD24_ctg0094 Escherichia coli ATCC 25922	1863..2642	Aminoglycoside resistance
aadA2b	XD33	E_coli_RXD33_ctg0139 Escherichia coli ATCC 25922	1879..2658	Aminoglycoside resistance
aadA2b	XD36	E_coli_RXD36_ctg0130 Escherichia coli ATCC 25922	1879..2658	Aminoglycoside resistance
aadA2b	E_coli_RXD5	E_coli_RXD5_ctg0110	1879..2658	Aminoglycoside resistance
aadA2b	XD97	E_coli_RXD97_ctg0188 Escherichia coli ATCC 25922	5..784	Aminoglycoside resistance
aadA2b	FY229	NODE_100_length_1509_cov_143.140363	5..784	Aminoglycoside resistance
aadA2b	HB84	NODE_100_length_3205_cov_172.852302	606..1385	Aminoglycoside resistance
aadA2b	S194	NODE_100_length_5290_cov_97.313639	2691..3470	Aminoglycoside resistance
aadA2b	S198	NODE_101_length_1509_cov_307.289106	5..784	Aminoglycoside resistance
aadA2b	CQ59	NODE_102_length_847_cov_200.372727	5..784	Aminoglycoside resistance
aadA2b	CQ73	NODE_102_length_847_cov_263.390909	64..843	Aminoglycoside resistance
aadA2b	CQ75	NODE_103_length_847_cov_240.136364	5..784	Aminoglycoside resistance
aadA2b	HUN23	NODE_105_length_1937_cov_86.426882	816..1595	Aminoglycoside resistance
aadA2b	FY44	NODE_105_length_3071_cov_191.580494	343..1122	Aminoglycoside resistance
aadA2b	CQ80	NODE_108_length_847_cov_236.685714	64..843	Aminoglycoside resistance
aadA2b	HUN59	NODE_110_length_2843_cov_121.779465	1722..2501	Aminoglycoside resistance
aadA2b	HB33	NODE_113_length_1509_cov_369.445531	5..784	Aminoglycoside resistance
aadA2b	HB36	NODE_113_length_1509_cov_369.445531	5..784	Aminoglycoside resistance
aadA2b	S61	NODE_113_length_3071_cov_165.971610	343..1122	Aminoglycoside resistance
aadA2b	S79	NODE_114_length_3071_cov_177.132599	1950..2729	Aminoglycoside resistance
aadA2b	CQ72	NODE_117_length_2656_cov_122.274525	156..935	Aminoglycoside resistance
aadA2b	S82	NODE_120_length_2843_cov_143.601952	343..1122	Aminoglycoside resistance
aadA2b	AH24	NODE_120_length_2942_cov_106.499476	343..1122	Aminoglycoside resistance
aadA2b	GZ9	NODE_120_length_3071_cov_78.705745	1950..2729	Aminoglycoside resistance
aadA2b	S191	NODE_122_length_980_cov_473.863787	197..976	Aminoglycoside resistance
aadA2b	AH41	NODE_125_length_2942_cov_128.568586	1821..2600	Aminoglycoside resistance
aadA2b	GZ29	NODE_126_length_3071_cov_123.997328	1950..2729	Aminoglycoside resistance
aadA2b	SHB15	NODE_140_length_581_cov_557.716270	5..581	Aminoglycoside resistance
aadA2b	CQ63	NODE_146_length_842_cov_320.000000	5..784	Aminoglycoside resistance
aadA2b	SAX4	NODE_164_length_581_cov_516.095238	5..581	Aminoglycoside resistance
aadA2b	AH36	NODE_30_length_9378_cov_109.707773	6779..7558	Aminoglycoside resistance
aadA2b	AH12	NODE_30_length_9740_cov_125.512263	7141..7920	Aminoglycoside resistance
aadA2b	S104	NODE_48_length_3071_cov_148.759185	343..1122	Aminoglycoside resistance
aadA2b	HUN20	NODE_48_length_3071_cov_99.171677	343..1122	Aminoglycoside resistance
aadA2b	S51	NODE_50_length_3071_cov_134.488644	1950..2729	Aminoglycoside resistance
aadA2b	HUN101	NODE_50_length_4751_cov_89.949936	2094..2873	Aminoglycoside resistance
aadA2b	XD2	NODE_56_length_4444_cov_106.631097	1829..2608	Aminoglycoside resistance
aadA2b	FY240	NODE_64_length_3071_cov_68.907816	343..1122	Aminoglycoside resistance
aadA2b	YN13	NODE_66_length_10683_cov_116.675655	3156..3935	Aminoglycoside resistance
aadA2b	GZ86	NODE_67_length_842_cov_160.711111	5..784	Aminoglycoside resistance
aadA2b	S95	NODE_69_length_2958_cov_138.853523	343..1122	Aminoglycoside resistance
aadA2b	FY207	NODE_71_length_4176_cov_106.327885	1676..2455	Aminoglycoside resistance
aadA2b	HUN15	NODE_72_length_2909_cov_138.645127	1975..2754	Aminoglycoside resistance
aadA2b	S89	NODE_72_length_2958_cov_156.830961	343..1122	Aminoglycoside resistance
aadA2b	HUN115	NODE_73_length_1937_cov_103.329032	816..1595	Aminoglycoside resistance
aadA2b	S91	NODE_76_length_2958_cov_199.857341	1837..2616	Aminoglycoside resistance
aadA2b	S70	NODE_76_length_3071_cov_180.444222	343..1122	Aminoglycoside resistance
aadA2b	FY246	NODE_76_length_4176_cov_85.650159	1676..2455	Aminoglycoside resistance
aadA2b	XD101	NODE_77_length_3071_cov_150.509018	1950..2729	Aminoglycoside resistance
aadA2b	HUBS28	NODE_77_length_7071_cov_72.899199	1722..2501	Aminoglycoside resistance
aadA2b	SX54	NODE_78_length_2585_cov_112.518341	969..1748	Aminoglycoside resistance
aadA2b	XD1	NODE_79_length_581_cov_1925.537698	1..577	Aminoglycoside resistance
aadA2b	FY66	NODE_80_length_1992_cov_178.411488	96..875	Aminoglycoside resistance
aadA2b	HUN38	NODE_82_length_1937_cov_109.396774	343..1122	Aminoglycoside resistance
aadA2b	HUN13	NODE_82_length_3071_cov_108.669005	1950..2729	Aminoglycoside resistance
aadA2b	FY239	NODE_85_length_2958_cov_77.684485	1837..2616	Aminoglycoside resistance
aadA2b	HUN16	NODE_85_length_3071_cov_82.338009	343..1122	Aminoglycoside resistance
aadA2b	AH84	NODE_90_length_3071_cov_87.461256	1950..2729	Aminoglycoside resistance
aadA2b	S196	NODE_91_length_4136_cov_335.497167	708..1487	Aminoglycoside resistance
aadA2b	S49	NODE_91_length_951_cov_127.627002	77..856	Aminoglycoside resistance
aadA2b	S67	NODE_92_length_3071_cov_127.882432	343..1122	Aminoglycoside resistance
aadA2b	FY248	NODE_92_length_9950_cov_45.616935	6493..7272	Aminoglycoside resistance
aadA2b	SAX2	NODE_93_length_841_cov_175.511780	5..784	Aminoglycoside resistance
aadA2b	S192	NODE_97_length_1509_cov_273.782123	5..784	Aminoglycoside resistance
aadA2b	S208	NODE_98_length_1509_cov_264.974860	726..1505	Aminoglycoside resistance
aadA3	YN39	NODE_101_length_2343_cov_221.567520	1683..2343	Aminoglycoside resistance
aadA3	AH40	NODE_112_length_782_cov_266.100709	66..782	Aminoglycoside resistance
aadA3	S75	NODE_118_length_776_cov_263.350501	60..776	Aminoglycoside resistance
aadA3	AH4	NODE_118_length_782_cov_253.412766	66..782	Aminoglycoside resistance
aadA3	AH27	NODE_124_length_782_cov_198.110638	1..717	Aminoglycoside resistance
aadA3	AH16	NODE_134_length_782_cov_222.838298	1..717	Aminoglycoside resistance
aadA3	HB22	NODE_134_length_848_cov_57.804150	132..848	Aminoglycoside resistance
aadA3	CQ7	NODE_155_length_777_cov_205.564286	1..717	Aminoglycoside resistance
aadA3	GS59	NODE_60_length_24650_cov_128.003663	4923..5714	Aminoglycoside resistance
aadA3	JX10	NODE_75_length_5288_cov_70.961620	1..717	Aminoglycoside resistance
aadA3	HB42	NODE_84_length_848_cov_57.538262	132..848	Aminoglycoside resistance
aadA3	HB38	NODE_89_length_2519_cov_114.219083	1803..2519	Aminoglycoside resistance
aadA5	SD7	NODE_107_length_1696_cov_80.956763	695..1483	Aminoglycoside resistance
aadA5	XJ48	NODE_107_length_2135_cov_99.195821	653..1441	Aminoglycoside resistance
aadA5	FY227	NODE_108_length_1349_cov_87.819969	77..655	Aminoglycoside resistance
aadA5	FY219	NODE_113_length_1349_cov_85.661950	77..655	Aminoglycoside resistance
aadA5	S56	NODE_113_length_1352_cov_128.040000	699..1277	Aminoglycoside resistance
aadA5	FY197	NODE_116_length_3408_cov_92.265086	212..1000	Aminoglycoside resistance
aadA5	SAX4	NODE_120_length_1801_cov_126.097448	214..1002	Aminoglycoside resistance
aadA5	SH22	NODE_2_length_428997_cov_105.286636	427552..428340	Aminoglycoside resistance
aadA5	XJ50	NODE_33_length_11225_cov_61.169537	7749..8537	Aminoglycoside resistance
aadA5	TJ50	NODE_34_length_11225_cov_85.231880	7749..8537	Aminoglycoside resistance
aadA5	XJ39	NODE_36_length_11224_cov_98.306719	7749..8537	Aminoglycoside resistance
aadA5	SC1	NODE_39_length_7639_cov_304.068368	6472..7260	Aminoglycoside resistance
aadA5	LN35	NODE_45_length_5347_cov_64.889943	4344..5132	Aminoglycoside resistance
aadA5	SD28	NODE_48_length_17713_cov_110.228793	7749..8537	Aminoglycoside resistance
aadA5	GS29	NODE_49_length_11224_cov_99.270745	7748..8536	Aminoglycoside resistance
aadA5	QH10	NODE_53_length_10225_cov_135.710485	1689..2477	Aminoglycoside resistance
aadA5	QH6	NODE_54_length_10225_cov_149.153922	1689..2477	Aminoglycoside resistance
aadA5	SAX16	NODE_57_length_11101_cov_128.054427	2566..3354	Aminoglycoside resistance
aadA5	S201	NODE_59_length_13147_cov_255.632670	10840..11628	Aminoglycoside resistance
aadA5	NMG42	NODE_60_length_11887_cov_112.232261	7586..8374	Aminoglycoside resistance
aadA5	QH9	NODE_62_length_6672_cov_123.795906	1689..2477	Aminoglycoside resistance
aadA5	HUN29	NODE_63_length_1701_cov_76.745074	215..1003	Aminoglycoside resistance
aadA5	QH8	NODE_63_length_6672_cov_110.100076	4196..4984	Aminoglycoside resistance
aadA5	HUNS32	NODE_64_length_11224_cov_71.995514	7748..8536	Aminoglycoside resistance
aadA5	HUN27	NODE_65_length_1701_cov_80.154557	699..1487	Aminoglycoside resistance
aadA5	GD40	NODE_66_length_11343_cov_84.390201	7749..8537	Aminoglycoside resistance
aadA5	XJ40	NODE_66_length_1660_cov_179.135818	701..1489	Aminoglycoside resistance
aadA5	SD11	NODE_69_length_10120_cov_104.245843	1584..2372	Aminoglycoside resistance
aadA5	QH7	NODE_69_length_1658_cov_134.621758	172..960	Aminoglycoside resistance
aadA5	QH2	NODE_71_length_1658_cov_140.581278	172..960	Aminoglycoside resistance
aadA5	NMG6	NODE_71_length_5001_cov_150.546913	3514..4302	Aminoglycoside resistance
aadA5	HUN45	NODE_77_length_3607_cov_87.447875	215..1003	Aminoglycoside resistance
aadA5	AH19	NODE_78_length_11225_cov_115.656082	7749..8537	Aminoglycoside resistance
aadA5	HUN56	NODE_78_length_3607_cov_86.686119	215..1003	Aminoglycoside resistance
aadA5	HUBS28	NODE_81_length_5002_cov_107.627817	3514..4302	Aminoglycoside resistance
aadA5	JX39	NODE_83_length_4150_cov_82.842131	1583..2371	Aminoglycoside resistance
aadA5	GS82	NODE_84_length_1701_cov_98.488300	215..1003	Aminoglycoside resistance
aadA5	GS93	NODE_84_length_4996_cov_154.699736	3514..4302	Aminoglycoside resistance
aadA5	HUBJ24	NODE_84_length_5245_cov_115.205495	2318..3106	Aminoglycoside resistance
aadA5	HUBJ20	NODE_86_length_4885_cov_110.266847	1780..2568	Aminoglycoside resistance
aadA5	CQ59	NODE_88_length_1802_cov_92.057971	215..1003	Aminoglycoside resistance
aadA5	HUBJ16	NODE_88_length_4885_cov_125.070923	2318..3106	Aminoglycoside resistance
aadA5	XD37	NODE_98_length_1840_cov_118.408962	699..1487	Aminoglycoside resistance
aadA8b	GS47	NODE_60_length_7336_cov_55.321462	2054..2845	Aminoglycoside resistance
aadA8b	SH63	NODE_84_length_3095_cov_126.790921	174..965	Aminoglycoside resistance
ant(2'')-Ia	E_coli_RXD10	E_coli_RXD10_ctg0182 Escherichia coli ATCC 25922	315..848	Aminoglycoside resistance Alternate name; ant(2'')-Ia
ant(2'')-Ia	E_coli_RXD5	E_coli_RXD5_ctg0209	315..848	Aminoglycoside resistance Alternate name; ant(2'')-Ia
ant(2'')-Ia	XD3	NODE_143_length_740_cov_99.135747	125..658	Aminoglycoside resistance Alternate name; ant(2'')-Ia
ant(2'')-Ia	XD37	NODE_65_length_10189_cov_140.215783	84..617	Aminoglycoside resistance Alternate name; ant(2'')-Ia
aph(3')-Ia	XD35	2 length=244138 depth=1.09x circular=true	102763..103578	Aminoglycoside resistance
aph(3')-Ia	E_coli_RXD10	E_coli_RXD10_ctg0065 Escherichia coli ATCC 25922	2371..3186	Aminoglycoside resistance
aph(3')-Ia	XD100	E_coli_RXD100_ctg0163 Escherichia coli ATCC 25922	228..1043	Aminoglycoside resistance
aph(3')-Ia	XD11	E_coli_RXD11_ctg0083 Escherichia coli ATCC 25922	2378..3193	Aminoglycoside resistance
aph(3')-Ia	XD115	E_coli_RXD115_ctg0139 Escherichia coli ATCC 25922	208..1023	Aminoglycoside resistance
aph(3')-Ia	XD12	E_coli_RXD12_ctg0121 Escherichia coli ATCC 25922	250..1065	Aminoglycoside resistance
aph(3')-Ia	XD20	E_coli_RXD20_ctg0120 Escherichia coli ATCC 25922	250..1065	Aminoglycoside resistance
aph(3')-Ia	XD24	E_coli_RXD24_ctg0123 Escherichia coli ATCC 25922	250..1065	Aminoglycoside resistance
aph(3')-Ia	XD33	E_coli_RXD33_ctg0085 Escherichia coli ATCC 25922	2378..3193	Aminoglycoside resistance
aph(3')-Ia	XD36	E_coli_RXD36_ctg0081 Escherichia coli ATCC 25922	2463..3278	Aminoglycoside resistance
aph(3')-Ia	E_coli_RXD5	E_coli_RXD5_ctg0068	2371..3186	Aminoglycoside resistance
aph(3')-Ia	XD97	E_coli_RXD97_ctg0098 Escherichia coli ATCC 25922	292..1107	Aminoglycoside resistance
aph(3')-Ia	CQ3	NODE_100_length_1192_cov_147.520179	214..1029	Aminoglycoside resistance
aph(3')-Ia	YN13	NODE_101_length_1192_cov_112.670852	164..979	Aminoglycoside resistance
aph(3')-Ia	HB38	NODE_101_length_1192_cov_118.344395	214..1029	Aminoglycoside resistance
aph(3')-Ia	HB45	NODE_101_length_1333_cov_80.579618	319..1134	Aminoglycoside resistance
aph(3')-Ia	S72	NODE_102_length_1192_cov_121.081614	164..979	Aminoglycoside resistance
aph(3')-Ia	JX42	NODE_102_length_1193_cov_110.843190	214..1029	Aminoglycoside resistance
aph(3')-Ia	GS61	NODE_102_length_2142_cov_127.180630	1143..1958	Aminoglycoside resistance
aph(3')-Ia	GS105	NODE_102_length_6183_cov_173.214543	403..1218	Aminoglycoside resistance
aph(3')-Ia	HUNS34	NODE_103_length_1191_cov_59.428187	213..1028	Aminoglycoside resistance
aph(3')-Ia	FY228	NODE_104_length_1189_cov_89.687950	213..1028	Aminoglycoside resistance
aph(3')-Ia	GS100	NODE_104_length_1191_cov_97.483842	213..1028	Aminoglycoside resistance
aph(3')-Ia	HUN7	NODE_104_length_4341_cov_130.648452	2328..3143	Aminoglycoside resistance
aph(3')-Ia	CQ92	NODE_105_length_1189_cov_70.234712	163..978	Aminoglycoside resistance
aph(3')-Ia	YN34	NODE_105_length_1190_cov_168.200359	213..1028	Aminoglycoside resistance
aph(3')-Ia	SD2	NODE_105_length_1192_cov_66.165022	164..979	Aminoglycoside resistance
aph(3')-Ia	S78	NODE_105_length_1192_cov_98.956054	164..979	Aminoglycoside resistance
aph(3')-Ia	SX52	NODE_105_length_1194_cov_103.493286	165..980	Aminoglycoside resistance
aph(3')-Ia	GS99	NODE_105_length_6183_cov_130.774648	4966..5781	Aminoglycoside resistance
aph(3')-Ia	FY207	NODE_106_length_1191_cov_507.271095	163..978	Aminoglycoside resistance
aph(3')-Ia	SC10	NODE_106_length_1192_cov_328.578475	214..1029	Aminoglycoside resistance
aph(3')-Ia	JX4	NODE_106_length_1193_cov_123.421147	165..980	Aminoglycoside resistance
aph(3')-Ia	GD40	NODE_106_length_1194_cov_79.704566	215..1030	Aminoglycoside resistance
aph(3')-Ia	S192	NODE_106_length_1216_cov_260.460931	277..1092	Aminoglycoside resistance
aph(3')-Ia	CQ72	NODE_106_length_4285_cov_96.046578	2328..3143	Aminoglycoside resistance
aph(3')-Ia	HB44	NODE_107_length_1188_cov_94.867687	214..1029	Aminoglycoside resistance
aph(3')-Ia	FY45	NODE_107_length_3299_cov_299.160459	404..1219	Aminoglycoside resistance
aph(3')-Ia	CQ46	NODE_108_length_1179_cov_120.854809	164..979	Aminoglycoside resistance
aph(3')-Ia	GS86	NODE_108_length_1333_cov_115.003981	319..1134	Aminoglycoside resistance
aph(3')-Ia	S181	NODE_109_length_1192_cov_159.924664	214..1029	Aminoglycoside resistance
aph(3')-Ia	S208	NODE_109_length_1216_cov_253.261633	277..1092	Aminoglycoside resistance
aph(3')-Ia	FY246	NODE_110_length_1190_cov_439.851752	213..1028	Aminoglycoside resistance
aph(3')-Ia	XD86	NODE_110_length_1192_cov_126.522870	164..979	Aminoglycoside resistance
aph(3')-Ia	S98	NODE_110_length_1192_cov_61.956951	214..1029	Aminoglycoside resistance
aph(3')-Ia	NMG39	NODE_110_length_1318_cov_124.832393	185..1000	Aminoglycoside resistance
aph(3')-Ia	FY227	NODE_111_length_1189_cov_166.051259	163..978	Aminoglycoside resistance
aph(3')-Ia	YN39	NODE_111_length_1190_cov_121.354897	213..1028	Aminoglycoside resistance
aph(3')-Ia	HUN105	NODE_111_length_1191_cov_56.312388	163..978	Aminoglycoside resistance
aph(3')-Ia	FY241	NODE_111_length_1204_cov_95.021295	214..1029	Aminoglycoside resistance
aph(3')-Ia	S198	NODE_112_length_1083_cov_219.658052	125..940	Aminoglycoside resistance
aph(3')-Ia	CQ51	NODE_113_length_1179_cov_104.056261	201..1016	Aminoglycoside resistance
aph(3')-Ia	CQ69	NODE_113_length_1189_cov_118.603417	161..976	Aminoglycoside resistance
aph(3')-Ia	HUBS28	NODE_113_length_1191_cov_105.675943	164..979	Aminoglycoside resistance
aph(3')-Ia	S201	NODE_113_length_901_cov_215.233010	1..814	Aminoglycoside resistance
aph(3')-Ia	XD37	NODE_114_length_1171_cov_218.324497	214..1029	Aminoglycoside resistance
aph(3')-Ia	GZ34	NODE_114_length_1190_cov_113.738544	163..978	Aminoglycoside resistance
aph(3')-Ia	JX12	NODE_114_length_1191_cov_84.833932	214..1029	Aminoglycoside resistance
aph(3')-Ia	FY213	NODE_114_length_1191_cov_93.185817	213..1028	Aminoglycoside resistance
aph(3')-Ia	CQ79	NODE_114_length_1191_cov_97.278276	214..1029	Aminoglycoside resistance
aph(3')-Ia	SC3	NODE_114_length_1192_cov_123.639462	214..1029	Aminoglycoside resistance
aph(3')-Ia	S191	NODE_115_length_1216_cov_466.178227	277..1090	Aminoglycoside resistance
aph(3')-Ia	CQ2	NODE_115_length_1331_cov_118.745614	199..1012	Aminoglycoside resistance
aph(3')-Ia	FY229	NODE_115_length_955_cov_111.421412	142..955	Aminoglycoside resistance
aph(3')-Ia	BJ21	NODE_117_length_1191_cov_204.667864	164..979	Aminoglycoside resistance
aph(3')-Ia	CQ8	NODE_117_length_1191_cov_69.180431	163..978	Aminoglycoside resistance
aph(3')-Ia	SD7	NODE_117_length_1191_cov_82.400359	214..1029	Aminoglycoside resistance
aph(3')-Ia	NMG12	NODE_117_length_1192_cov_106.391928	163..978	Aminoglycoside resistance
aph(3')-Ia	HB37	NODE_117_length_1192_cov_65.155157	214..1029	Aminoglycoside resistance
aph(3')-Ia	S196	NODE_117_length_1212_cov_404.886344	273..1088	Aminoglycoside resistance
aph(3')-Ia	FY219	NODE_118_length_1189_cov_175.047662	163..978	Aminoglycoside resistance
aph(3')-Ia	S61	NODE_118_length_2142_cov_121.102663	185..1000	Aminoglycoside resistance
aph(3')-Ia	HB33	NODE_119_length_1191_cov_168.210054	163..978	Aminoglycoside resistance
aph(3')-Ia	HB36	NODE_119_length_1191_cov_168.210054	163..978	Aminoglycoside resistance
aph(3')-Ia	GS93	NODE_119_length_1192_cov_112.765022	164..979	Aminoglycoside resistance
aph(3')-Ia	AH13	NODE_119_length_1192_cov_94.599103	215..1030	Aminoglycoside resistance
aph(3')-Ia	S79	NODE_119_length_2142_cov_143.502179	185..1000	Aminoglycoside resistance
aph(3')-Ia	FY268	NODE_120_length_1191_cov_282.010772	214..1029	Aminoglycoside resistance
aph(3')-Ia	S87	NODE_120_length_1192_cov_69.686996	214..1029	Aminoglycoside resistance
aph(3')-Ia	GS86	NODE_120_length_1331_cov_98.473684	200..1015	Aminoglycoside resistance
aph(3')-Ia	GS85	NODE_120_length_1331_cov_98.473684	200..1015	Aminoglycoside resistance
aph(3')-Ia	XJ48	NODE_122_length_1190_cov_100.265948	214..1029	Aminoglycoside resistance
aph(3')-Ia	SHB15	NODE_124_length_1192_cov_108.585650	214..1029	Aminoglycoside resistance
aph(3')-Ia	XD3	NODE_126_length_1081_cov_87.217131	142..957	Aminoglycoside resistance
aph(3')-Ia	FY209	NODE_126_length_1191_cov_109.398564	213..1028	Aminoglycoside resistance
aph(3')-Ia	HB29	NODE_126_length_1192_cov_67.024215	214..1029	Aminoglycoside resistance
aph(3')-Ia	SD23	NODE_126_length_1194_cov_44.401970	167..982	Aminoglycoside resistance
aph(3')-Ia	CQ12	NODE_127_length_1331_cov_109.847687	320..1133	Aminoglycoside resistance
aph(3')-Ia	NMG32	NODE_128_length_1318_cov_186.128122	319..1134	Aminoglycoside resistance
aph(3')-Ia	CQ66	NODE_132_length_1191_cov_104.413824	213..1028	Aminoglycoside resistance
aph(3')-Ia	FY187	NODE_132_length_1193_cov_76.058244	165..980	Aminoglycoside resistance
aph(3')-Ia	S212	NODE_133_length_1191_cov_381.356373	214..1029	Aminoglycoside resistance
aph(3')-Ia	FY253	NODE_134_length_1191_cov_140.381508	214..1029	Aminoglycoside resistance
aph(3')-Ia	FY74	NODE_134_length_1204_cov_116.417924	214..1029	Aminoglycoside resistance
aph(3')-Ia	CQ63	NODE_136_length_1189_cov_119.258993	161..976	Aminoglycoside resistance
aph(3')-Ia	SAX4	NODE_137_length_1191_cov_128.885996	213..1028	Aminoglycoside resistance
aph(3')-Ia	QH5	NODE_137_length_1193_cov_77.609319	165..980	Aminoglycoside resistance
aph(3')-Ia	NMG48	NODE_137_length_1318_cov_210.614021	185..1000	Aminoglycoside resistance
aph(3')-Ia	CQ7	NODE_137_length_1329_cov_92.380990	198..1013	Aminoglycoside resistance
aph(3')-Ia	S203	NODE_139_length_1192_cov_99.771300	214..1029	Aminoglycoside resistance
aph(3')-Ia	NMG49	NODE_140_length_1191_cov_98.076302	164..979	Aminoglycoside resistance
aph(3')-Ia	QH4	NODE_141_length_1193_cov_74.172939	165..980	Aminoglycoside resistance
aph(3')-Ia	QH12	NODE_141_length_1193_cov_79.223118	165..980	Aminoglycoside resistance
aph(3')-Ia	HB61	NODE_145_length_1043_cov_79.797101	213..967	Aminoglycoside resistance
aph(3')-Ia	FY248	NODE_146_length_1192_cov_43.462780	164..979	Aminoglycoside resistance
aph(3')-Ia	NMG50	NODE_146_length_1192_cov_85.452018	164..979	Aminoglycoside resistance
aph(3')-Ia	HUN84	NODE_147_length_1175_cov_74.215847	201..1016	Aminoglycoside resistance
aph(3')-Ia	AH24	NODE_149_length_1193_cov_97.484767	164..979	Aminoglycoside resistance
aph(3')-Ia	AH29	NODE_150_length_1192_cov_76.244843	214..1029	Aminoglycoside resistance
aph(3')-Ia	JX18	NODE_153_length_1330_cov_97.799681	200..1015	Aminoglycoside resistance
aph(3')-Ia	CQ16	NODE_154_length_1332_cov_118.757769	320..1133	Aminoglycoside resistance
aph(3')-Ia	CQ1	NODE_156_length_1332_cov_179.055777	200..1015	Aminoglycoside resistance
aph(3')-Ia	AH41	NODE_157_length_1193_cov_116.225806	215..1030	Aminoglycoside resistance
aph(3')-Ia	FY197	NODE_158_length_1218_cov_190.226994	278..1093	Aminoglycoside resistance
aph(3')-Ia	HLJ34	NODE_159_length_1033_cov_95.359833	76..819	Aminoglycoside resistance
aph(3')-Ia	NMG47	NODE_159_length_1191_cov_559.225314	213..1028	Aminoglycoside resistance
aph(3')-Ia	CQ14	NODE_163_length_1332_cov_123.026295	200..1015	Aminoglycoside resistance
aph(3')-Ia	S194	NODE_167_length_1042_cov_151.303627	76..830	Aminoglycoside resistance
aph(3')-Ia	FY237	NODE_169_length_1191_cov_113.503591	163..978	Aminoglycoside resistance
aph(3')-Ia	NMG46	NODE_169_length_1316_cov_148.541566	317..1132	Aminoglycoside resistance
aph(3')-Ia	XJ17	NODE_173_length_1193_cov_333.626344	214..1029	Aminoglycoside resistance
aph(3')-Ia	CQ77	NODE_185_length_1191_cov_81.723519	163..978	Aminoglycoside resistance
aph(3')-Ia	SD5	NODE_189_length_1192_cov_160.092377	214..1029	Aminoglycoside resistance
aph(3')-Ia	FY249	NODE_196_length_1191_cov_164.320467	164..979	Aminoglycoside resistance
aph(3')-Ia	S199	NODE_2_length_169301_cov_134.730749	117605..118418	Aminoglycoside resistance
aph(3')-Ia	FY251	NODE_205_length_1190_cov_86.913747	213..1028	Aminoglycoside resistance
aph(3')-Ia	HB6	NODE_215_length_1190_cov_85.292004	162..977	Aminoglycoside resistance
aph(3')-Ia	GS59	NODE_221_length_511_cov_1.122120	1..503	Aminoglycoside resistance
aph(3')-Ia	HUN18	NODE_27_length_35533_cov_163.037934	24813..25628	Aminoglycoside resistance
aph(3')-Ia	LN35	NODE_28_length_36667_cov_99.419678	27001..27816	Aminoglycoside resistance
aph(3')-Ia	HUN50	NODE_30_length_35533_cov_88.621869	24813..25628	Aminoglycoside resistance
aph(3')-Ia	LN64	NODE_31_length_33663_cov_87.718067	26093..26908	Aminoglycoside resistance
aph(3')-Ia	QH13	NODE_32_length_35648_cov_97.778724	10021..10836	Aminoglycoside resistance
aph(3')-Ia	CQ67	NODE_34_length_31681_cov_174.819675	29636..30451	Aminoglycoside resistance
aph(3')-Ia	S73	NODE_34_length_33795_cov_125.780918	26219..27034	Aminoglycoside resistance
aph(3')-Ia	FY252	NODE_341_length_1191_cov_120.004488	164..979	Aminoglycoside resistance
aph(3')-Ia	S95	NODE_35_length_52634_cov_92.072797	6016..6831	Aminoglycoside resistance
aph(3')-Ia	HUN20	NODE_37_length_9156_cov_93.790946	2327..3142	Aminoglycoside resistance
aph(3')-Ia	S104	NODE_38_length_9159_cov_144.092160	2330..3145	Aminoglycoside resistance
aph(3')-Ia	HUN71	NODE_39_length_31054_cov_61.036124	5426..6241	Aminoglycoside resistance
aph(3')-Ia	HUN19	NODE_4_length_342518_cov_126.933466	253..1066	Aminoglycoside resistance
aph(3')-Ia	HN15	NODE_40_length_1193_cov_69.939068	164..979	Aminoglycoside resistance
aph(3')-Ia	SC4	NODE_40_length_31054_cov_124.229331	24814..25629	Aminoglycoside resistance
aph(3')-Ia	HB84	NODE_40_length_45321_cov_114.746464	43953..44768	Aminoglycoside resistance
aph(3')-Ia	QH7	NODE_41_length_29476_cov_105.020273	27228..28041	Aminoglycoside resistance
aph(3')-Ia	NMG6	NODE_41_length_32700_cov_130.856819	25124..25939	Aminoglycoside resistance
aph(3')-Ia	GZ40	NODE_42_length_10665_cov_106.756233	6016..6831	Aminoglycoside resistance
aph(3')-Ia	QH2	NODE_42_length_29476_cov_125.917412	27228..28043	Aminoglycoside resistance
aph(3')-Ia	QH10	NODE_42_length_29839_cov_165.518749	27591..28406	Aminoglycoside resistance
aph(3')-Ia	SD1	NODE_42_length_31855_cov_88.851281	6228..7043	Aminoglycoside resistance
aph(3')-Ia	HUN38	NODE_42_length_35197_cov_78.799288	9569..10384	Aminoglycoside resistance
aph(3')-Ia	QH6	NODE_43_length_29477_cov_138.237313	27229..28044	Aminoglycoside resistance
aph(3')-Ia	QH8	NODE_43_length_29477_cov_88.754252	1434..2249	Aminoglycoside resistance
aph(3')-Ia	NMG42	NODE_43_length_32700_cov_88.535604	6762..7577	Aminoglycoside resistance
aph(3')-Ia	S158	NODE_44_length_32113_cov_68.903359	21640..22455	Aminoglycoside resistance
aph(3')-Ia	QH9	NODE_45_length_29477_cov_132.000238	1434..2249	Aminoglycoside resistance
aph(3')-Ia	XD171	NODE_45_length_35287_cov_65.758421	24814..25629	Aminoglycoside resistance
aph(3')-Ia	S193	NODE_47_length_3842_cov_153.796547	371..1186	Aminoglycoside resistance
aph(3')-Ia	HUN4	NODE_47_length_9159_cov_91.422814	6018..6831	Aminoglycoside resistance
aph(3')-Ia	S51	NODE_48_length_3656_cov_112.164851	2657..3472	Aminoglycoside resistance
aph(3')-Ia	CQ59	NODE_50_length_32043_cov_96.826753	1593..2408	Aminoglycoside resistance
aph(3')-Ia	HUN24	NODE_50_length_9159_cov_88.565294	6015..6830	Aminoglycoside resistance
aph(3')-Ia	XJ26	NODE_51_length_1968_cov_450.060814, NODE_51_length_1968_cov_450.060814	1359..1806, 214..590	Aminoglycoside resistance
aph(3')-Ia	GS128	NODE_51_length_29477_cov_112.055544	1434..2249	Aminoglycoside resistance
aph(3')-Ia	XD2	NODE_51_length_7201_cov_105.569483	371..1186	Aminoglycoside resistance
aph(3')-Ia	XD38	NODE_52_length_1191_cov_76.033214	163..978	Aminoglycoside resistance
aph(3')-Ia	NMG10	NODE_52_length_3299_cov_108.538796	404..1219	Aminoglycoside resistance
aph(3')-Ia	XD101	NODE_52_length_9159_cov_143.388351	6016..6831	Aminoglycoside resistance
aph(3')-Ia	XJ33	NODE_53_length_1968_cov_301.514014, NODE_53_length_1968_cov_301.514014	163..610, 1379..1755	Aminoglycoside resistance
aph(3')-Ia	HUN115	NODE_53_length_9159_cov_90.307311	2330..3145	Aminoglycoside resistance
aph(3')-Ia	FY261	NODE_54_length_7200_cov_90.455566	371..1186	Aminoglycoside resistance
aph(3')-Ia	NMG8	NODE_54_length_988_cov_134.441273	50..865	Aminoglycoside resistance
aph(3')-Ia	HUN9	NODE_55_length_4342_cov_80.665651	1199..2014	Aminoglycoside resistance
aph(3')-Ia	FY257	NODE_55_length_7200_cov_164.222097	371..1186	Aminoglycoside resistance
aph(3')-Ia	S89	NODE_56_length_10364_cov_155.264897	6016..6831	Aminoglycoside resistance
aph(3')-Ia	FY240	NODE_56_length_7014_cov_63.405074	185..1000	Aminoglycoside resistance
aph(3')-Ia	S49	NODE_56_length_9158_cov_151.995155	2329..3144	Aminoglycoside resistance
aph(3')-Ia	SH22	NODE_57_length_1192_cov_112.158744	214..1029	Aminoglycoside resistance
aph(3')-Ia	FY267	NODE_57_length_7200_cov_89.637512	371..1186	Aminoglycoside resistance
aph(3')-Ia	FY66	NODE_57_length_9158_cov_170.435194	6015..6830	Aminoglycoside resistance
aph(3')-Ia	XD116	NODE_58_length_1192_cov_94.779372	214..1029	Aminoglycoside resistance
aph(3')-Ia	GS208	NODE_58_length_1531_cov_294.730399	553..1368	Aminoglycoside resistance
aph(3')-Ia	GS6	NODE_58_length_29216_cov_60.697828	6762..7577	Aminoglycoside resistance
aph(3')-Ia	S205	NODE_58_length_9160_cov_134.493119	6016..6831	Aminoglycoside resistance
aph(3')-Ia	NMG5	NODE_58_length_988_cov_133.980241	50..865	Aminoglycoside resistance
aph(3')-Ia	HUN15	NODE_59_length_7134_cov_94.295876	307..1120	Aminoglycoside resistance
aph(3')-Ia	FY119	NODE_61_length_1192_cov_97.578475	164..979	Aminoglycoside resistance
aph(3')-Ia	S210	NODE_61_length_23378_cov_49.215570	21123..21938	Aminoglycoside resistance
aph(3')-Ia	GS34	NODE_62_length_1193_cov_56.639785	165..980	Aminoglycoside resistance
aph(3')-Ia	NMG3	NODE_62_length_988_cov_175.467618	50..865	Aminoglycoside resistance
aph(3')-Ia	CQ31	NODE_63_length_1192_cov_135.419731	215..1030	Aminoglycoside resistance
aph(3')-Ia	S99	NODE_63_length_1192_cov_145.267265	164..979	Aminoglycoside resistance
aph(3')-Ia	GS35	NODE_63_length_1193_cov_76.853943	165..980	Aminoglycoside resistance
aph(3')-Ia	S182	NODE_63_length_23378_cov_45.953006	21123..21938	Aminoglycoside resistance
aph(3')-Ia	S200	NODE_63_length_23378_cov_46.239174	21123..21938	Aminoglycoside resistance
aph(3')-Ia	HB24	NODE_63_length_3299_cov_44.075109	2081..2896	Aminoglycoside resistance
aph(3')-Ia	S195	NODE_64_length_8723_cov_130.672334	7724..8539	Aminoglycoside resistance
aph(3')-Ia	SH77	NODE_65_length_4234_cov_155.604763	215..1030	Aminoglycoside resistance
aph(3')-Ia	HUN14	NODE_65_length_9159_cov_82.462013	6016..6831	Aminoglycoside resistance
aph(3')-Ia	S91	NODE_65_length_9160_cov_164.787295	2330..3145	Aminoglycoside resistance
aph(3')-Ia	NMG9	NODE_65_length_988_cov_322.336992	124..939	Aminoglycoside resistance
aph(3')-Ia	JX38	NODE_66_length_1193_cov_66.710573	214..1029	Aminoglycoside resistance
aph(3')-Ia	ZJ20	NODE_66_length_23888_cov_75.541262	1434..2249	Aminoglycoside resistance
aph(3')-Ia	S70	NODE_66_length_9157_cov_160.501432	2328..3143	Aminoglycoside resistance
aph(3')-Ia	JL33	NODE_67_length_1193_cov_62.314516	164..979	Aminoglycoside resistance
aph(3')-Ia	SH79	NODE_67_length_3775_cov_85.476474	215..1030	Aminoglycoside resistance
aph(3')-Ia	JX10	NODE_67_length_9158_cov_62.039533	6015..6830	Aminoglycoside resistance
aph(3')-Ia	LN36	NODE_68_length_1331_cov_71.678628	317..1132	Aminoglycoside resistance
aph(3')-Ia	ZJ29	NODE_69_length_11654_cov_150.702168	404..1219	Aminoglycoside resistance
aph(3')-Ia	JX45	NODE_69_length_1171_cov_88.971664	144..959	Aminoglycoside resistance
aph(3')-Ia	GS33	NODE_69_length_1192_cov_128.406278	214..1029	Aminoglycoside resistance
aph(3')-Ia	XD1	NODE_69_length_1192_cov_1537.927354	164..979	Aminoglycoside resistance
aph(3')-Ia	XD26	NODE_69_length_3528_cov_160.882643	204..1017	Aminoglycoside resistance
aph(3')-Ia	SH68	NODE_69_length_3775_cov_76.401839	215..1030	Aminoglycoside resistance
aph(3')-Ia	XJ40	NODE_70_length_1402_cov_70.394717	403..1218	Aminoglycoside resistance
aph(3')-Ia	XD25	NODE_71_length_3528_cov_154.392060	2512..3325	Aminoglycoside resistance
aph(3')-Ia	S67	NODE_71_length_9159_cov_114.133671	6015..6830	Aminoglycoside resistance
aph(3')-Ia	HUN23	NODE_71_length_9159_cov_83.341445	2329..3144	Aminoglycoside resistance
aph(3')-Ia	HUN16	NODE_72_length_9157_cov_80.617181	2327..3142	Aminoglycoside resistance
aph(3')-Ia	CQ15	NODE_73_length_1192_cov_56.296861	213..1028	Aminoglycoside resistance
aph(3')-Ia	SD10	NODE_73_length_1192_cov_84.557848	164..979	Aminoglycoside resistance
aph(3')-Ia	NMG29	NODE_73_length_1333_cov_86.325637	319..1134	Aminoglycoside resistance
aph(3')-Ia	LN42	NODE_73_length_7014_cov_106.763298	185..1000	Aminoglycoside resistance
aph(3')-Ia	HUBJ8	NODE_74_length_1190_cov_106.538185	162..977	Aminoglycoside resistance
aph(3')-Ia	CQ17	NODE_74_length_1192_cov_61.163229	165..980	Aminoglycoside resistance
aph(3')-Ia	S75	NODE_74_length_3869_cov_123.088344	2650..3465	Aminoglycoside resistance
aph(3')-Ia	JX23	NODE_75_length_1192_cov_72.433184	214..1029	Aminoglycoside resistance
aph(3')-Ia	FY183	NODE_75_length_5685_cov_153.792796	4686..5501	Aminoglycoside resistance
aph(3')-Ia	XJ15	NODE_76_length_7201_cov_168.568080	371..1186	Aminoglycoside resistance
aph(3')-Ia	HUN11	NODE_76_length_9159_cov_101.048998	2329..3144	Aminoglycoside resistance
aph(3')-Ia	SH50	NODE_77_length_1329_cov_67.953674	200..1015	Aminoglycoside resistance
aph(3')-Ia	ZJ1	NODE_77_length_7006_cov_2755.674123	5978..6791	Aminoglycoside resistance
aph(3')-Ia	HUN59	NODE_77_length_9159_cov_93.994715	2329..3144	Aminoglycoside resistance
aph(3')-Ia	CQ10	NODE_78_length_1031_cov_141.837526	93..908	Aminoglycoside resistance
aph(3')-Ia	S206	NODE_78_length_7015_cov_162.848948	185..1000	Aminoglycoside resistance
aph(3')-Ia	AH28	NODE_79_length_1190_cov_99.108715	214..1029	Aminoglycoside resistance
aph(3')-Ia	CQ20	NODE_79_length_1192_cov_64.318386	164..979	Aminoglycoside resistance
aph(3')-Ia	JS77	NODE_79_length_1192_cov_86.634081	214..1029	Aminoglycoside resistance
aph(3')-Ia	YN33	NODE_79_length_1193_cov_60.997312	214..1029	Aminoglycoside resistance
aph(3')-Ia	QH3	NODE_79_length_1193_cov_68.306452	165..980	Aminoglycoside resistance
aph(3')-Ia	HUN58	NODE_79_length_9159_cov_81.802026	2329..3144	Aminoglycoside resistance
aph(3')-Ia	CQ29	NODE_80_length_1191_cov_153.361759	163..978	Aminoglycoside resistance
aph(3')-Ia	BJ32	NODE_80_length_1193_cov_152.990143	164..979	Aminoglycoside resistance
aph(3')-Ia	SH46	NODE_80_length_1329_cov_105.242013	200..1015	Aminoglycoside resistance
aph(3')-Ia	LN62	NODE_81_length_1192_cov_77.498655	214..1029	Aminoglycoside resistance
aph(3')-Ia	CQ32	NODE_82_length_1190_cov_188.353100	212..1027	Aminoglycoside resistance
aph(3')-Ia	CQ4	NODE_82_length_1192_cov_67.628700	164..979	Aminoglycoside resistance
aph(3')-Ia	CQ9	NODE_82_length_1192_cov_79.312108	164..979	Aminoglycoside resistance
aph(3')-Ia	S82	NODE_82_length_9155_cov_130.919696	6015..6830	Aminoglycoside resistance
aph(3')-Ia	FY44	NODE_82_length_9158_cov_132.769739	2328..3143	Aminoglycoside resistance
aph(3')-Ia	CQ21	NODE_83_length_1189_cov_100.801259	163..978	Aminoglycoside resistance
aph(3')-Ia	CQ26	NODE_83_length_1189_cov_136.631295	163..978	Aminoglycoside resistance
aph(3')-Ia	CQ33	NODE_84_length_1189_cov_105.357914	212..1027	Aminoglycoside resistance
aph(3')-Ia	CQ25	NODE_84_length_1189_cov_96.296763	212..1027	Aminoglycoside resistance
aph(3')-Ia	AH20	NODE_84_length_1191_cov_186.196589	162..977	Aminoglycoside resistance
aph(3')-Ia	NMG25	NODE_85_length_1498_cov_114.414497	371..1186	Aminoglycoside resistance
aph(3')-Ia	S103	NODE_86_length_1191_cov_97.302513	164..979	Aminoglycoside resistance
aph(3')-Ia	FY230	NODE_86_length_1332_cov_93.278088	319..1134	Aminoglycoside resistance
aph(3')-Ia	CQ28	NODE_87_length_1191_cov_67.673250	163..978	Aminoglycoside resistance
aph(3')-Ia	CQ35	NODE_88_length_1190_cov_77.242588	212..1027	Aminoglycoside resistance
aph(3')-Ia	SAX15	NODE_88_length_1193_cov_87.447133	214..1029	Aminoglycoside resistance
aph(3')-Ia	GZ9	NODE_88_length_9156_cov_77.197599	2328..3143	Aminoglycoside resistance
aph(3')-Ia	CQ34	NODE_89_length_1189_cov_84.242806	163..978	Aminoglycoside resistance
aph(3')-Ia	QH18	NODE_89_length_1190_cov_86.680144	213..1028	Aminoglycoside resistance
aph(3')-Ia	XD39	NODE_89_length_1191_cov_59.910233	213..1028	Aminoglycoside resistance
aph(3')-Ia	GZ29	NODE_89_length_9156_cov_122.478467	2328..3143	Aminoglycoside resistance
aph(3')-Ia	SAX2	NODE_90_length_1190_cov_89.870620	214..1029	Aminoglycoside resistance
aph(3')-Ia	CQ30	NODE_90_length_1190_cov_95.362084	212..1027	Aminoglycoside resistance
aph(3')-Ia	AH22	NODE_90_length_1191_cov_105.345601	162..977	Aminoglycoside resistance
aph(3')-Ia	HUN129	NODE_90_length_1191_cov_62.586176	163..978	Aminoglycoside resistance
aph(3')-Ia	GZ98	NODE_90_length_1193_cov_99.666667	164..979	Aminoglycoside resistance
aph(3')-Ia	GS82	NODE_90_length_1332_cov_91.385657	319..1134	Aminoglycoside resistance
aph(3')-Ia	HUBS21	NODE_91_length_1191_cov_127.729803	162..977	Aminoglycoside resistance
aph(3')-Ia	XD34	NODE_91_length_1192_cov_91.252018	164..979	Aminoglycoside resistance
aph(3')-Ia	QH1	NODE_91_length_1193_cov_74.948029	214..1029	Aminoglycoside resistance
aph(3')-Ia	AH11	NODE_92_length_1191_cov_190.712747	162..977	Aminoglycoside resistance
aph(3')-Ia	XD40	NODE_92_length_1191_cov_81.496409	213..1028	Aminoglycoside resistance
aph(3')-Ia	HUN108	NODE_92_length_1193_cov_201.077061	165..980	Aminoglycoside resistance
aph(3')-Ia	QH17	NODE_92_length_1193_cov_65.555556	165..980	Aminoglycoside resistance
aph(3')-Ia	HUN8	NODE_92_length_9152_cov_114.038347	6015..6830	Aminoglycoside resistance
aph(3')-Ia	LN43	NODE_93_length_1173_cov_88.927920	196..1011	Aminoglycoside resistance
aph(3')-Ia	GZ55	NODE_93_length_1190_cov_94.813118	213..1028	Aminoglycoside resistance
aph(3')-Ia	XJ35	NODE_93_length_1191_cov_128.712747	163..978	Aminoglycoside resistance
aph(3')-Ia	LN59	NODE_93_length_1192_cov_69.717489	214..1029	Aminoglycoside resistance
aph(3')-Ia	LN44	NODE_93_length_3402_cov_86.775038	2424..3239	Aminoglycoside resistance
aph(3')-Ia	CQ22	NODE_94_length_1189_cov_86.539568	163..978	Aminoglycoside resistance
aph(3')-Ia	HLJ64	NODE_94_length_1191_cov_103.935368	214..1029	Aminoglycoside resistance
aph(3')-Ia	CQ78	NODE_94_length_1192_cov_67.531839	214..1029	Aminoglycoside resistance
aph(3')-Ia	XD23	NODE_94_length_1192_cov_88.575785	164..979	Aminoglycoside resistance
aph(3')-Ia	GZ10	NODE_94_length_4287_cov_126.777435	2330..3145	Aminoglycoside resistance
aph(3')-Ia	FY256	NODE_95_length_9158_cov_115.303050	6015..6830	Aminoglycoside resistance
aph(3')-Ia	LN74	NODE_96_length_1193_cov_59.879928	214..1029	Aminoglycoside resistance
aph(3')-Ia	FY216	NODE_96_length_1193_cov_64.339606	165..980	Aminoglycoside resistance
aph(3')-Ia	GZ31	NODE_96_length_5314_cov_146.887722	2330..3145	Aminoglycoside resistance
aph(3')-Ia	HUN77	NODE_98_length_1192_cov_126.918386	164..979	Aminoglycoside resistance
aph(3')-Ia	GS138	NODE_98_length_3818_cov_122.936915	1841..2656	Aminoglycoside resistance
aph(3')-Ia	GZ12	NODE_99_length_1188_cov_45.610261	212..1027	Aminoglycoside resistance
aph(3')-Ia	HUN111	NODE_99_length_1189_cov_139.689748	213..1028	Aminoglycoside resistance
aph(3')-Ia	S52	NODE_99_length_1192_cov_131.099552	164..979	Aminoglycoside resistance
aph(3')-Ia	LN13	NODE_99_length_1192_cov_94.227803	214..1029	Aminoglycoside resistance
aph(3')-Ia	S180	NODE_99_length_1192_cov_96.126457	214..1029	Aminoglycoside resistance
aph(3')-Ia	LN75	NODE_99_length_1193_cov_59.260753	214..1029	Aminoglycoside resistance
aph(3'')-Ib	XD35	2 length=244138 depth=1.09x circular=true	100789..101591	Aminoglycoside resistance Alternate name; aph(3'')-Ib
aph(3'')-Ib	XD35	2 length=244138 depth=1.09x circular=true	100788..101591	Aminoglycoside resistance Alternate name; aph(3'')-Ib
aph(3'')-Ib	E_coli_RXD10	E_coli_RXD10_ctg0065 Escherichia coli ATCC 25922	397..1199	Aminoglycoside resistance Alternate name; aph(3'')-Ib
aph(3'')-Ib	E_coli_RXD10	E_coli_RXD10_ctg0065 Escherichia coli ATCC 25922	396..1199	Aminoglycoside resistance Alternate name; aph(3'')-Ib
aph(3'')-Ib	XD11	E_coli_RXD11_ctg0083 Escherichia coli ATCC 25922	404..1206	Aminoglycoside resistance Alternate name; aph(3'')-Ib
aph(3'')-Ib	XD11	E_coli_RXD11_ctg0083 Escherichia coli ATCC 25922	403..1206	Aminoglycoside resistance Alternate name; aph(3'')-Ib
aph(3'')-Ib	XD12	E_coli_RXD12_ctg0070 Escherichia coli ATCC 25922	3971..4774	Aminoglycoside resistance Alternate name; aph(3'')-Ib
aph(3'')-Ib	XD20	E_coli_RXD20_ctg0069 Escherichia coli ATCC 25922	3971..4774	Aminoglycoside resistance Alternate name; aph(3'')-Ib
aph(3'')-Ib	XD24	E_coli_RXD24_ctg0072 Escherichia coli ATCC 25922	3971..4774	Aminoglycoside resistance Alternate name; aph(3'')-Ib
aph(3'')-Ib	XD33	E_coli_RXD33_ctg0085 Escherichia coli ATCC 25922	404..1206	Aminoglycoside resistance Alternate name; aph(3'')-Ib
aph(3'')-Ib	XD33	E_coli_RXD33_ctg0085 Escherichia coli ATCC 25922	403..1206	Aminoglycoside resistance Alternate name; aph(3'')-Ib
aph(3'')-Ib	XD36	E_coli_RXD36_ctg0081 Escherichia coli ATCC 25922	489..1291	Aminoglycoside resistance Alternate name; aph(3'')-Ib
aph(3'')-Ib	XD36	E_coli_RXD36_ctg0081 Escherichia coli ATCC 25922	488..1291	Aminoglycoside resistance Alternate name; aph(3'')-Ib
aph(3'')-Ib	E_coli_RXD5	E_coli_RXD5_ctg0068	397..1199	Aminoglycoside resistance Alternate name; aph(3'')-Ib
aph(3'')-Ib	E_coli_RXD5	E_coli_RXD5_ctg0068	396..1199	Aminoglycoside resistance Alternate name; aph(3'')-Ib
aph(3'')-Ib	SH22	NODE_10_length_164767_cov_107.578790	162946..163749	Aminoglycoside resistance Alternate name; aph(3'')-Ib
aph(3'')-Ib	AH90	NODE_10_length_192098_cov_109.725290	130220..131023	Aminoglycoside resistance Alternate name; aph(3'')-Ib
aph(3'')-Ib	NMG39	NODE_101_length_2044_cov_102.859685	1058..1860	Aminoglycoside resistance Alternate name; aph(3'')-Ib
aph(3'')-Ib	NMG39	NODE_101_length_2044_cov_102.859685	1057..1860	Aminoglycoside resistance Alternate name; aph(3'')-Ib
aph(3'')-Ib	XJ48	NODE_101_length_2707_cov_96.616350	185..988	Aminoglycoside resistance Alternate name; aph(3'')-Ib
aph(3'')-Ib	HB84	NODE_102_length_2552_cov_198.252525, NODE_102_length_2552_cov_198.252525	1862..2390, 1019..1300	Aminoglycoside resistance Alternate name; aph(3'')-Ib
aph(3'')-Ib	GS105	NODE_102_length_6183_cov_173.214543	2390..3192	Aminoglycoside resistance Alternate name; aph(3'')-Ib
aph(3'')-Ib	GS105	NODE_102_length_6183_cov_173.214543	2390..3193	Aminoglycoside resistance Alternate name; aph(3'')-Ib
aph(3'')-Ib	S191	NODE_103_length_1718_cov_322.632541	943..1718	Aminoglycoside resistance Alternate name; aph(3'')-Ib
aph(3'')-Ib	GS138	NODE_103_length_3113_cov_134.532609	586..1388	Aminoglycoside resistance Alternate name; aph(3'')-Ib
aph(3'')-Ib	GS138	NODE_103_length_3113_cov_134.532609	585..1388	Aminoglycoside resistance Alternate name; aph(3'')-Ib
aph(3'')-Ib	HUN7	NODE_104_length_4341_cov_130.648452	354..1156	Aminoglycoside resistance Alternate name; aph(3'')-Ib
aph(3'')-Ib	HUN7	NODE_104_length_4341_cov_130.648452	353..1156	Aminoglycoside resistance Alternate name; aph(3'')-Ib
aph(3'')-Ib	ZJ1	NODE_105_length_2688_cov_115.456147	1591..2394	Aminoglycoside resistance Alternate name; aph(3'')-Ib
aph(3'')-Ib	GS99	NODE_105_length_6183_cov_130.774648	2992..3794	Aminoglycoside resistance Alternate name; aph(3'')-Ib
aph(3'')-Ib	GS99	NODE_105_length_6183_cov_130.774648	2991..3794	Aminoglycoside resistance Alternate name; aph(3'')-Ib
aph(3'')-Ib	CQ72	NODE_106_length_4285_cov_96.046578	354..1156	Aminoglycoside resistance Alternate name; aph(3'')-Ib
aph(3'')-Ib	CQ72	NODE_106_length_4285_cov_96.046578	353..1156	Aminoglycoside resistance Alternate name; aph(3'')-Ib
aph(3'')-Ib	FY183	NODE_107_length_1478_cov_286.201999	879..1478	Aminoglycoside resistance Alternate name; aph(3'')-Ib
aph(3'')-Ib	FY45	NODE_107_length_3299_cov_299.160459	2391..3194	Aminoglycoside resistance Alternate name; aph(3'')-Ib
aph(3'')-Ib	XJ15	NODE_107_length_959_cov_317.821995	33..836	Aminoglycoside resistance Alternate name; aph(3'')-Ib
aph(3'')-Ib	SD35	NODE_108_length_1124_cov_159.452722	216..1019	Aminoglycoside resistance Alternate name; aph(3'')-Ib
aph(3'')-Ib	S195	NODE_109_length_959_cov_249.199546	33..836	Aminoglycoside resistance Alternate name; aph(3'')-Ib
aph(3'')-Ib	S196	NODE_113_length_1283_cov_350.801824	1..600	Aminoglycoside resistance Alternate name; aph(3'')-Ib
aph(3'')-Ib	FY251	NODE_113_length_5539_cov_79.088612	2182..2985	Aminoglycoside resistance Alternate name; aph(3'')-Ib
aph(3'')-Ib	FY74	NODE_115_length_1927_cov_75.952973	106..909	Aminoglycoside resistance Alternate name; aph(3'')-Ib
aph(3'')-Ib	S206	NODE_115_length_723_cov_293.380805	124..723	Aminoglycoside resistance Alternate name; aph(3'')-Ib
aph(3'')-Ib	NMG7	NODE_117_length_2573_cov_208.471554	388..1191	Aminoglycoside resistance Alternate name; aph(3'')-Ib
aph(3'')-Ib	LN42	NODE_118_length_1478_cov_294.904354	1..600	Aminoglycoside resistance Alternate name; aph(3'')-Ib
aph(3'')-Ib	GZ86	NODE_12_length_191815_cov_128.849513	130219..131022	Aminoglycoside resistance Alternate name; aph(3'')-Ib
aph(3'')-Ib	CQ77	NODE_120_length_6673_cov_70.580200	2815..3618	Aminoglycoside resistance Alternate name; aph(3'')-Ib
aph(3'')-Ib	S75	NODE_120_length_723_cov_214.215170	124..723	Aminoglycoside resistance Alternate name; aph(3'')-Ib
aph(3'')-Ib	FY268	NODE_121_length_1185_cov_136.370939	277..1080	Aminoglycoside resistance Alternate name; aph(3'')-Ib
aph(3'')-Ib	NMG32	NODE_123_length_1581_cov_127.513298	1055..1581	Aminoglycoside resistance Alternate name; aph(3'')-Ib
aph(3'')-Ib	S61	NODE_127_length_1354_cov_120.734534	351..1153	Aminoglycoside resistance Alternate name; aph(3'')-Ib
aph(3'')-Ib	S61	NODE_127_length_1354_cov_120.734534	350..1153	Aminoglycoside resistance Alternate name; aph(3'')-Ib
aph(3'')-Ib	NMG48	NODE_127_length_1582_cov_120.578738	1056..1582	Aminoglycoside resistance Alternate name; aph(3'')-Ib
aph(3'')-Ib	SD12	NODE_127_length_2102_cov_119.095802	1194..1997	Aminoglycoside resistance Alternate name; aph(3'')-Ib
aph(3'')-Ib	S79	NODE_128_length_1354_cov_131.891151	351..1153	Aminoglycoside resistance Alternate name; aph(3'')-Ib
aph(3'')-Ib	S79	NODE_128_length_1354_cov_131.891151	350..1153	Aminoglycoside resistance Alternate name; aph(3'')-Ib
aph(3'')-Ib	XD37	NODE_133_length_689_cov_225.037582	163..689	Aminoglycoside resistance Alternate name; aph(3'')-Ib
aph(3'')-Ib	FY253	NODE_135_length_1185_cov_63.754513	106..909	Aminoglycoside resistance Alternate name; aph(3'')-Ib
aph(3'')-Ib	SH43	NODE_14_length_106303_cov_98.312965	27841..28644	Aminoglycoside resistance Alternate name; aph(3'')-Ib
aph(3'')-Ib	JX23	NODE_14_length_111141_cov_125.561118	108412..109214	Aminoglycoside resistance Alternate name; aph(3'')-Ib
aph(3'')-Ib	JX23	NODE_14_length_111141_cov_125.561118	108412..109215	Aminoglycoside resistance Alternate name; aph(3'')-Ib
aph(3'')-Ib	GS61	NODE_140_length_723_cov_254.376161	124..723	Aminoglycoside resistance Alternate name; aph(3'')-Ib
aph(3'')-Ib	FY197	NODE_142_length_1718_cov_218.914686	943..1718	Aminoglycoside resistance Alternate name; aph(3'')-Ib
aph(3'')-Ib	JX18	NODE_149_length_1493_cov_190.875000	1..527	Aminoglycoside resistance Alternate name; aph(3'')-Ib
aph(3'')-Ib	AH47	NODE_15_length_133509_cov_114.651111	2488..3291	Aminoglycoside resistance Alternate name; aph(3'')-Ib
aph(3'')-Ib	FY237	NODE_150_length_2409_cov_118.700686	976..1778	Aminoglycoside resistance Alternate name; aph(3'')-Ib
aph(3'')-Ib	FY237	NODE_150_length_2409_cov_118.700686	976..1779	Aminoglycoside resistance Alternate name; aph(3'')-Ib
aph(3'')-Ib	NMG46	NODE_157_length_1581_cov_88.015293	1055..1581	Aminoglycoside resistance Alternate name; aph(3'')-Ib
aph(3'')-Ib	SH7	NODE_16_length_106303_cov_79.795436	77660..78463	Aminoglycoside resistance Alternate name; aph(3'')-Ib
aph(3'')-Ib	FY249	NODE_184_length_1478_cov_318.006424	1..600	Aminoglycoside resistance Alternate name; aph(3'')-Ib
aph(3'')-Ib	S199	NODE_2_length_169301_cov_134.730749	119472..120275	Aminoglycoside resistance Alternate name; aph(3'')-Ib
aph(3'')-Ib	HUN127	NODE_2_length_264008_cov_72.488207	16811..17614	Aminoglycoside resistance Alternate name; aph(3'')-Ib
aph(3'')-Ib	NMG5	NODE_20_length_61320_cov_97.401874	1..527	Aminoglycoside resistance Alternate name; aph(3'')-Ib
aph(3'')-Ib	NMG3	NODE_21_length_61320_cov_104.584263	60794..61320	Aminoglycoside resistance Alternate name; aph(3'')-Ib
aph(3'')-Ib	NMG8	NODE_21_length_61602_cov_125.159415	1..527	Aminoglycoside resistance Alternate name; aph(3'')-Ib
aph(3'')-Ib	SH36	NODE_21_length_88154_cov_121.752308	59511..60314	Aminoglycoside resistance Alternate name; aph(3'')-Ib
aph(3'')-Ib	NMG9	NODE_22_length_61320_cov_164.341819	1..527	Aminoglycoside resistance Alternate name; aph(3'')-Ib
aph(3'')-Ib	S158	NODE_22_length_72772_cov_149.823028	70678..71480	Aminoglycoside resistance Alternate name; aph(3'')-Ib
aph(3'')-Ib	S158	NODE_22_length_72772_cov_149.823028	70678..71481	Aminoglycoside resistance Alternate name; aph(3'')-Ib
aph(3'')-Ib	XD171	NODE_22_length_72772_cov_89.223138	70678..71480	Aminoglycoside resistance Alternate name; aph(3'')-Ib
aph(3'')-Ib	XD171	NODE_22_length_72772_cov_89.223138	70678..71481	Aminoglycoside resistance Alternate name; aph(3'')-Ib
aph(3'')-Ib	GZ12	NODE_23_length_48639_cov_87.296199	1194..1997	Aminoglycoside resistance Alternate name; aph(3'')-Ib
aph(3'')-Ib	HUNS46	NODE_23_length_71552_cov_65.439412	2666..3468	Aminoglycoside resistance Alternate name; aph(3'')-Ib
aph(3'')-Ib	HUNS46	NODE_23_length_71552_cov_65.439412	2665..3468	Aminoglycoside resistance Alternate name; aph(3'')-Ib
aph(3'')-Ib	LN69	NODE_24_length_61400_cov_101.233273	25618..26421	Aminoglycoside resistance Alternate name; aph(3'')-Ib
aph(3'')-Ib	SH30	NODE_24_length_68502_cov_87.865955	32718..33521	Aminoglycoside resistance Alternate name; aph(3'')-Ib
aph(3'')-Ib	HUBJ24	NODE_24_length_76380_cov_128.710352	68129..68932	Aminoglycoside resistance Alternate name; aph(3'')-Ib
aph(3'')-Ib	FY228	NODE_25_length_76237_cov_92.652967	567..1369	Aminoglycoside resistance Alternate name; aph(3'')-Ib
aph(3'')-Ib	FY228	NODE_25_length_76237_cov_92.652967	566..1369	Aminoglycoside resistance Alternate name; aph(3'')-Ib
aph(3'')-Ib	JL33	NODE_25_length_82059_cov_114.106401	10273..11076	Aminoglycoside resistance Alternate name; aph(3'')-Ib
aph(3'')-Ib	SD15	NODE_27_length_15026_cov_96.453743	9636..10439	Aminoglycoside resistance Alternate name; aph(3'')-Ib
aph(3'')-Ib	SAX35	NODE_27_length_33329_cov_77.819710	32421..33224	Aminoglycoside resistance Alternate name; aph(3'')-Ib
aph(3'')-Ib	GX38	NODE_28_length_61867_cov_64.176161	34980..35783	Aminoglycoside resistance Alternate name; aph(3'')-Ib
aph(3'')-Ib	FY252	NODE_306_length_1478_cov_235.159172	879..1478	Aminoglycoside resistance Alternate name; aph(3'')-Ib
aph(3'')-Ib	AH36	NODE_31_length_7931_cov_106.142857	1121..1924	Aminoglycoside resistance Alternate name; aph(3'')-Ib
aph(3'')-Ib	AH12	NODE_32_length_7931_cov_100.694041	6008..6811	Aminoglycoside resistance Alternate name; aph(3'')-Ib
aph(3'')-Ib	SX54	NODE_35_length_44461_cov_59.550762	34023..34826	Aminoglycoside resistance Alternate name; aph(3'')-Ib
aph(3'')-Ib	S95	NODE_35_length_52634_cov_92.072797	8003..8805	Aminoglycoside resistance Alternate name; aph(3'')-Ib
aph(3'')-Ib	S95	NODE_35_length_52634_cov_92.072797	8003..8806	Aminoglycoside resistance Alternate name; aph(3'')-Ib
aph(3'')-Ib	XJ50	NODE_37_length_6545_cov_63.252628	1435..2238	Aminoglycoside resistance Alternate name; aph(3'')-Ib
aph(3'')-Ib	HUN20	NODE_37_length_9156_cov_93.790946	353..1155	Aminoglycoside resistance Alternate name; aph(3'')-Ib
aph(3'')-Ib	HUN20	NODE_37_length_9156_cov_93.790946	352..1155	Aminoglycoside resistance Alternate name; aph(3'')-Ib
aph(3'')-Ib	HUN26	NODE_38_length_36108_cov_146.217563	9634..10437	Aminoglycoside resistance Alternate name; aph(3'')-Ib
aph(3'')-Ib	TJ50	NODE_38_length_6545_cov_85.391156	4308..5111	Aminoglycoside resistance Alternate name; aph(3'')-Ib
aph(3'')-Ib	S104	NODE_38_length_9159_cov_144.092160	356..1158	Aminoglycoside resistance Alternate name; aph(3'')-Ib
aph(3'')-Ib	S104	NODE_38_length_9159_cov_144.092160	355..1158	Aminoglycoside resistance Alternate name; aph(3'')-Ib
aph(3'')-Ib	XJ39	NODE_39_length_6544_cov_98.114427	1434..2237	Aminoglycoside resistance Alternate name; aph(3'')-Ib
aph(3'')-Ib	S52	NODE_4_length_212857_cov_115.292612	153286..154089	Aminoglycoside resistance Alternate name; aph(3'')-Ib
aph(3'')-Ib	GZ40	NODE_42_length_10665_cov_106.756233	8003..8805	Aminoglycoside resistance Alternate name; aph(3'')-Ib
aph(3'')-Ib	GZ40	NODE_42_length_10665_cov_106.756233	8003..8806	Aminoglycoside resistance Alternate name; aph(3'')-Ib
aph(3'')-Ib	SH59	NODE_42_length_3943_cov_99.157711	1071..1874	Aminoglycoside resistance Alternate name; aph(3'')-Ib
aph(3'')-Ib	GS128	NODE_42_length_41879_cov_122.675039	6781..7583	Aminoglycoside resistance Alternate name; aph(3'')-Ib
aph(3'')-Ib	GS128	NODE_42_length_41879_cov_122.675039	6780..7583	Aminoglycoside resistance Alternate name; aph(3'')-Ib
aph(3'')-Ib	HUBS37	NODE_42_length_7901_cov_218.850716	1666..2469	Aminoglycoside resistance Alternate name; aph(3'')-Ib
aph(3'')-Ib	SH53	NODE_43_length_3943_cov_104.976617	1071..1874	Aminoglycoside resistance Alternate name; aph(3'')-Ib
aph(3'')-Ib	HUNS48	NODE_44_length_16925_cov_50.323540	4485..5288	Aminoglycoside resistance Alternate name; aph(3'')-Ib
aph(3'')-Ib	SH55	NODE_44_length_3943_cov_96.647264	2070..2873	Aminoglycoside resistance Alternate name; aph(3'')-Ib
aph(3'')-Ib	SH47	NODE_45_length_3943_cov_63.009950	2070..2873	Aminoglycoside resistance Alternate name; aph(3'')-Ib
aph(3'')-Ib	XJ26	NODE_45_length_7067_cov_151.266237	6159..6962	Aminoglycoside resistance Alternate name; aph(3'')-Ib
aph(3'')-Ib	SD21	NODE_46_length_14928_cov_140.367113	9636..10439	Aminoglycoside resistance Alternate name; aph(3'')-Ib
aph(3'')-Ib	CQ32	NODE_46_length_15148_cov_179.569836	8337..9140	Aminoglycoside resistance Alternate name; aph(3'')-Ib
aph(3'')-Ib	SH57	NODE_46_length_3943_cov_96.346766	1071..1874	Aminoglycoside resistance Alternate name; aph(3'')-Ib
aph(3'')-Ib	CQ21	NODE_47_length_15148_cov_105.247230	8338..9141	Aminoglycoside resistance Alternate name; aph(3'')-Ib
aph(3'')-Ib	CQ29	NODE_47_length_15148_cov_174.749054	8338..9141	Aminoglycoside resistance Alternate name; aph(3'')-Ib
aph(3'')-Ib	HUBS36	NODE_47_length_6685_cov_76.433263	4689..5492	Aminoglycoside resistance Alternate name; aph(3'')-Ib
aph(3'')-Ib	HUN4	NODE_47_length_9159_cov_91.422814	8003..8805	Aminoglycoside resistance Alternate name; aph(3'')-Ib
aph(3'')-Ib	HUN4	NODE_47_length_9159_cov_91.422814	8003..8806	Aminoglycoside resistance Alternate name; aph(3'')-Ib
aph(3'')-Ib	FY207	NODE_48_length_11571_cov_228.662172	8616..9419	Aminoglycoside resistance Alternate name; aph(3'')-Ib
aph(3'')-Ib	CQ26	NODE_48_length_15149_cov_121.774018	6008..6811	Aminoglycoside resistance Alternate name; aph(3'')-Ib
aph(3'')-Ib	CQ25	NODE_48_length_15149_cov_93.160032	6008..6811	Aminoglycoside resistance Alternate name; aph(3'')-Ib
aph(3'')-Ib	HUBJ30	NODE_48_length_23911_cov_127.795250	1928..2730	Aminoglycoside resistance Alternate name; aph(3'')-Ib
aph(3'')-Ib	HUBJ30	NODE_48_length_23911_cov_127.795250	1927..2730	Aminoglycoside resistance Alternate name; aph(3'')-Ib
aph(3'')-Ib	HUBJ25	NODE_48_length_23911_cov_136.615172	1928..2730	Aminoglycoside resistance Alternate name; aph(3'')-Ib
aph(3'')-Ib	HUBJ25	NODE_48_length_23911_cov_136.615172	1927..2730	Aminoglycoside resistance Alternate name; aph(3'')-Ib
aph(3'')-Ib	HUN78	NODE_48_length_8170_cov_175.472136	6371..7174	Aminoglycoside resistance Alternate name; aph(3'')-Ib
aph(3'')-Ib	CQ33	NODE_49_length_15149_cov_111.069201	6008..6811	Aminoglycoside resistance Alternate name; aph(3'')-Ib
aph(3'')-Ib	CQ28	NODE_50_length_15149_cov_69.684382	6008..6811	Aminoglycoside resistance Alternate name; aph(3'')-Ib
aph(3'')-Ib	HUN24	NODE_50_length_9159_cov_88.565294	8002..8804	Aminoglycoside resistance Alternate name; aph(3'')-Ib
aph(3'')-Ib	HUN24	NODE_50_length_9159_cov_88.565294	8002..8805	Aminoglycoside resistance Alternate name; aph(3'')-Ib
aph(3'')-Ib	CQ30	NODE_51_length_15147_cov_96.327671	8337..9140	Aminoglycoside resistance Alternate name; aph(3'')-Ib
aph(3'')-Ib	CQ34	NODE_51_length_15149_cov_85.009753	6008..6811	Aminoglycoside resistance Alternate name; aph(3'')-Ib
aph(3'')-Ib	LN35	NODE_51_length_2102_cov_118.675556	1194..1997	Aminoglycoside resistance Alternate name; aph(3'')-Ib
aph(3'')-Ib	HUN111	NODE_51_length_23949_cov_146.153485	1966..2768	Aminoglycoside resistance Alternate name; aph(3'')-Ib
aph(3'')-Ib	HUN111	NODE_51_length_23949_cov_146.153485	1965..2768	Aminoglycoside resistance Alternate name; aph(3'')-Ib
aph(3'')-Ib	CQ52	NODE_51_length_5438_cov_125.119754	1666..2469	Aminoglycoside resistance Alternate name; aph(3'')-Ib
aph(3'')-Ib	AH28	NODE_51_length_6723_cov_127.138429	994..1797	Aminoglycoside resistance Alternate name; aph(3'')-Ib
aph(3'')-Ib	FY246	NODE_52_length_11417_cov_104.346473	8616..9419	Aminoglycoside resistance Alternate name; aph(3'')-Ib
aph(3'')-Ib	CQ35	NODE_52_length_15147_cov_79.411944	8337..9140	Aminoglycoside resistance Alternate name; aph(3'')-Ib
aph(3'')-Ib	CQ22	NODE_52_length_15148_cov_92.680645	8338..9141	Aminoglycoside resistance Alternate name; aph(3'')-Ib
aph(3'')-Ib	NMG10	NODE_52_length_3299_cov_108.538796	2391..3194	Aminoglycoside resistance Alternate name; aph(3'')-Ib
aph(3'')-Ib	HUN107	NODE_52_length_8055_cov_114.125345	997..1800	Aminoglycoside resistance Alternate name; aph(3'')-Ib
aph(3'')-Ib	XD101	NODE_52_length_9159_cov_143.388351	8003..8805	Aminoglycoside resistance Alternate name; aph(3'')-Ib
aph(3'')-Ib	XD101	NODE_52_length_9159_cov_143.388351	8003..8806	Aminoglycoside resistance Alternate name; aph(3'')-Ib
aph(3'')-Ib	S147	NODE_53_length_23398_cov_174.180009	15332..16135	Aminoglycoside resistance Alternate name; aph(3'')-Ib
aph(3'')-Ib	QH13	NODE_53_length_4965_cov_79.441489	2969..3772	Aminoglycoside resistance Alternate name; aph(3'')-Ib
aph(3'')-Ib	HUN115	NODE_53_length_9159_cov_90.307311	356..1158	Aminoglycoside resistance Alternate name; aph(3'')-Ib
aph(3'')-Ib	HUN115	NODE_53_length_9159_cov_90.307311	355..1158	Aminoglycoside resistance Alternate name; aph(3'')-Ib
aph(3'')-Ib	CQ31	NODE_54_length_2119_cov_214.245837	138..941	Aminoglycoside resistance Alternate name; aph(3'')-Ib
aph(3'')-Ib	GS3	NODE_54_length_6528_cov_89.152379	1236..2039	Aminoglycoside resistance Alternate name; aph(3'')-Ib
aph(3'')-Ib	S87	NODE_55_length_16418_cov_127.841809	15067..15869	Aminoglycoside resistance Alternate name; aph(3'')-Ib
aph(3'')-Ib	S87	NODE_55_length_16418_cov_127.841809	15066..15869	Aminoglycoside resistance Alternate name; aph(3'')-Ib
aph(3'')-Ib	SC1	NODE_55_length_2183_cov_193.965337	1275..2078	Aminoglycoside resistance Alternate name; aph(3'')-Ib
aph(3'')-Ib	HUN9	NODE_55_length_4342_cov_80.665651	3186..3988	Aminoglycoside resistance Alternate name; aph(3'')-Ib
aph(3'')-Ib	HUN9	NODE_55_length_4342_cov_80.665651	3186..3989	Aminoglycoside resistance Alternate name; aph(3'')-Ib
aph(3'')-Ib	GS29	NODE_55_length_6568_cov_104.121861	1434..2237	Aminoglycoside resistance Alternate name; aph(3'')-Ib
aph(3'')-Ib	S89	NODE_56_length_10364_cov_155.264897	8003..8805	Aminoglycoside resistance Alternate name; aph(3'')-Ib
aph(3'')-Ib	S89	NODE_56_length_10364_cov_155.264897	8003..8806	Aminoglycoside resistance Alternate name; aph(3'')-Ib
aph(3'')-Ib	S98	NODE_56_length_16418_cov_109.810110	550..1352	Aminoglycoside resistance Alternate name; aph(3'')-Ib
aph(3'')-Ib	S98	NODE_56_length_16418_cov_109.810110	550..1353	Aminoglycoside resistance Alternate name; aph(3'')-Ib
aph(3'')-Ib	S88	NODE_56_length_16418_cov_122.768190	550..1352	Aminoglycoside resistance Alternate name; aph(3'')-Ib
aph(3'')-Ib	S88	NODE_56_length_16418_cov_122.768190	550..1353	Aminoglycoside resistance Alternate name; aph(3'')-Ib
aph(3'')-Ib	S51	NODE_56_length_2370_cov_104.932839	509..1311	Aminoglycoside resistance Alternate name; aph(3'')-Ib
aph(3'')-Ib	S51	NODE_56_length_2370_cov_104.932839	508..1311	Aminoglycoside resistance Alternate name; aph(3'')-Ib
aph(3'')-Ib	S49	NODE_56_length_9158_cov_151.995155	355..1157	Aminoglycoside resistance Alternate name; aph(3'')-Ib
aph(3'')-Ib	S49	NODE_56_length_9158_cov_151.995155	354..1157	Aminoglycoside resistance Alternate name; aph(3'')-Ib
aph(3'')-Ib	SH52	NODE_57_length_3335_cov_126.336710	1194..1997	Aminoglycoside resistance Alternate name; aph(3'')-Ib
aph(3'')-Ib	QH7	NODE_57_length_4538_cov_140.797579	2814..3617	Aminoglycoside resistance Alternate name; aph(3'')-Ib
aph(3'')-Ib	FY66	NODE_57_length_9158_cov_170.435194	8002..8804	Aminoglycoside resistance Alternate name; aph(3'')-Ib
aph(3'')-Ib	FY66	NODE_57_length_9158_cov_170.435194	8002..8805	Aminoglycoside resistance Alternate name; aph(3'')-Ib
aph(3'')-Ib	NMG24	NODE_58_length_20439_cov_72.424025	11756..12559	Aminoglycoside resistance Alternate name; aph(3'')-Ib
aph(3'')-Ib	BJ25	NODE_58_length_7505_cov_78.468228	2619..3422	Aminoglycoside resistance Alternate name; aph(3'')-Ib
aph(3'')-Ib	S205	NODE_58_length_9160_cov_134.493119	8003..8805	Aminoglycoside resistance Alternate name; aph(3'')-Ib
aph(3'')-Ib	S205	NODE_58_length_9160_cov_134.493119	8003..8806	Aminoglycoside resistance Alternate name; aph(3'')-Ib
aph(3'')-Ib	GS207	NODE_59_length_4538_cov_123.551446	922..1725	Aminoglycoside resistance Alternate name; aph(3'')-Ib
aph(3'')-Ib	QH2	NODE_59_length_4538_cov_138.000000	922..1725	Aminoglycoside resistance Alternate name; aph(3'')-Ib
aph(3'')-Ib	SH51	NODE_6_length_183453_cov_99.077464	10273..11076	Aminoglycoside resistance Alternate name; aph(3'')-Ib
aph(3'')-Ib	GS191	NODE_60_length_6741_cov_134.945378	5833..6636	Aminoglycoside resistance Alternate name; aph(3'')-Ib
aph(3'')-Ib	LN62	NODE_61_length_11388_cov_103.645301	950..1753	Aminoglycoside resistance Alternate name; aph(3'')-Ib
aph(3'')-Ib	FY48	NODE_61_length_11457_cov_109.286819	9859..10662	Aminoglycoside resistance Alternate name; aph(3'')-Ib
aph(3'')-Ib	HUBJ12	NODE_61_length_14928_cov_171.263349	9636..10439	Aminoglycoside resistance Alternate name; aph(3'')-Ib
aph(3'')-Ib	HUN19	NODE_61_length_1714_cov_353.982285	33..836	Aminoglycoside resistance Alternate name; aph(3'')-Ib
aph(3'')-Ib	HUN45	NODE_61_length_7644_cov_79.209462	2397..3200	Aminoglycoside resistance Alternate name; aph(3'')-Ib
aph(3'')-Ib	HUBJ28	NODE_62_length_10823_cov_53.690303	1376..2179	Aminoglycoside resistance Alternate name; aph(3'')-Ib
aph(3'')-Ib	XJ32	NODE_62_length_11988_cov_93.898245	1550..2353	Aminoglycoside resistance Alternate name; aph(3'')-Ib
aph(3'')-Ib	SH56	NODE_62_length_3335_cov_112.549110	1194..1997	Aminoglycoside resistance Alternate name; aph(3'')-Ib
aph(3'')-Ib	GZ43	NODE_62_length_3609_cov_63.075595	1532..2335	Aminoglycoside resistance Alternate name; aph(3'')-Ib
aph(3'')-Ib	JX25	NODE_62_length_6299_cov_127.369977	1175..1978	Aminoglycoside resistance Alternate name; aph(3'')-Ib
aph(3'')-Ib	HUN56	NODE_62_length_7644_cov_78.022862	4445..5248	Aminoglycoside resistance Alternate name; aph(3'')-Ib
aph(3'')-Ib	SD16	NODE_63_length_14017_cov_59.148494	7227..8029	Aminoglycoside resistance Alternate name; aph(3'')-Ib
aph(3'')-Ib	SD16	NODE_63_length_14017_cov_59.148494	7226..8029	Aminoglycoside resistance Alternate name; aph(3'')-Ib
aph(3'')-Ib	XD3	NODE_63_length_17702_cov_86.059234	7264..8067	Aminoglycoside resistance Alternate name; aph(3'')-Ib
aph(3'')-Ib	XJ40	NODE_63_length_1823_cov_237.172394	106..909	Aminoglycoside resistance Alternate name; aph(3'')-Ib
aph(3'')-Ib	CQ66	NODE_63_length_20967_cov_116.287458	16001..16804	Aminoglycoside resistance Alternate name; aph(3'')-Ib
aph(3'')-Ib	HB24	NODE_63_length_3299_cov_44.075109	106..909	Aminoglycoside resistance Alternate name; aph(3'')-Ib
aph(3'')-Ib	HUN38	NODE_64_length_6410_cov_409.044371, NODE_64_length_6410_cov_409.044371	115..643, 6040..6321	Aminoglycoside resistance Alternate name; aph(3'')-Ib
aph(3'')-Ib	NMG42	NODE_64_length_9422_cov_2535.665062	921..1724	Aminoglycoside resistance Alternate name; aph(3'')-Ib
aph(3'')-Ib	XJ33	NODE_65_length_1124_cov_181.429799	216..1019	Aminoglycoside resistance Alternate name; aph(3'')-Ib
aph(3'')-Ib	QH10	NODE_65_length_4536_cov_139.834268	920..1723	Aminoglycoside resistance Alternate name; aph(3'')-Ib
aph(3'')-Ib	XJ35	NODE_65_length_6370_cov_125.345622	3172..3975	Aminoglycoside resistance Alternate name; aph(3'')-Ib
aph(3'')-Ib	HUN14	NODE_65_length_9159_cov_82.462013	8003..8805	Aminoglycoside resistance Alternate name; aph(3'')-Ib
aph(3'')-Ib	HUN14	NODE_65_length_9159_cov_82.462013	8003..8806	Aminoglycoside resistance Alternate name; aph(3'')-Ib
aph(3'')-Ib	S91	NODE_65_length_9160_cov_164.787295	356..1158	Aminoglycoside resistance Alternate name; aph(3'')-Ib
aph(3'')-Ib	S91	NODE_65_length_9160_cov_164.787295	355..1158	Aminoglycoside resistance Alternate name; aph(3'')-Ib
aph(3'')-Ib	SH50	NODE_66_length_4480_cov_176.064956	1531..2334	Aminoglycoside resistance Alternate name; aph(3'')-Ib
aph(3'')-Ib	S70	NODE_66_length_9157_cov_160.501432	354..1156	Aminoglycoside resistance Alternate name; aph(3'')-Ib
aph(3'')-Ib	S70	NODE_66_length_9157_cov_160.501432	353..1156	Aminoglycoside resistance Alternate name; aph(3'')-Ib
aph(3'')-Ib	SH41	NODE_67_length_11405_cov_79.490907	9636..10439	Aminoglycoside resistance Alternate name; aph(3'')-Ib
aph(3'')-Ib	CQ92	NODE_67_length_11566_cov_97.772130	9636..10439	Aminoglycoside resistance Alternate name; aph(3'')-Ib
aph(3'')-Ib	NX28	NODE_67_length_11679_cov_58.947423	1166..1968	Aminoglycoside resistance Alternate name; aph(3'')-Ib
aph(3'')-Ib	NX28	NODE_67_length_11679_cov_58.947423	1165..1968	Aminoglycoside resistance Alternate name; aph(3'')-Ib
aph(3'')-Ib	HUNS33	NODE_67_length_12833_cov_104.090467	9635..10438	Aminoglycoside resistance Alternate name; aph(3'')-Ib
aph(3'')-Ib	QH6	NODE_67_length_4536_cov_149.427450	920..1723	Aminoglycoside resistance Alternate name; aph(3'')-Ib
aph(3'')-Ib	TJ	NODE_67_length_6310_cov_60.807155	4489..5292	Aminoglycoside resistance Alternate name; aph(3'')-Ib
aph(3'')-Ib	JX10	NODE_67_length_9158_cov_62.039533	8002..8804	Aminoglycoside resistance Alternate name; aph(3'')-Ib
aph(3'')-Ib	JX10	NODE_67_length_9158_cov_62.039533	8002..8805	Aminoglycoside resistance Alternate name; aph(3'')-Ib
aph(3'')-Ib	XJ36	NODE_68_length_1124_cov_190.406877	216..1019	Aminoglycoside resistance Alternate name; aph(3'')-Ib
aph(3'')-Ib	HB38	NODE_68_length_12429_cov_77.246519	965..1768	Aminoglycoside resistance Alternate name; aph(3'')-Ib
aph(3'')-Ib	ZJ29	NODE_69_length_11654_cov_150.702168	2391..3194	Aminoglycoside resistance Alternate name; aph(3'')-Ib
aph(3'')-Ib	HUBS24	NODE_69_length_12833_cov_75.456648	9635..10438	Aminoglycoside resistance Alternate name; aph(3'')-Ib
aph(3'')-Ib	XD26	NODE_69_length_3528_cov_160.882643	2071..2874	Aminoglycoside resistance Alternate name; aph(3'')-Ib
aph(3'')-Ib	JX16	NODE_70_length_7941_cov_146.609741	5110..5912	Aminoglycoside resistance Alternate name; aph(3'')-Ib
aph(3'')-Ib	JX16	NODE_70_length_7941_cov_146.609741	5110..5913	Aminoglycoside resistance Alternate name; aph(3'')-Ib
aph(3'')-Ib	XD25	NODE_71_length_3528_cov_154.392060	655..1458	Aminoglycoside resistance Alternate name; aph(3'')-Ib
aph(3'')-Ib	HUN72	NODE_71_length_6135_cov_181.958402	4413..5216	Aminoglycoside resistance Alternate name; aph(3'')-Ib
aph(3'')-Ib	S67	NODE_71_length_9159_cov_114.133671	8002..8804	Aminoglycoside resistance Alternate name; aph(3'')-Ib
aph(3'')-Ib	S67	NODE_71_length_9159_cov_114.133671	8002..8805	Aminoglycoside resistance Alternate name; aph(3'')-Ib
aph(3'')-Ib	HUN23	NODE_71_length_9159_cov_83.341445	355..1157	Aminoglycoside resistance Alternate name; aph(3'')-Ib
aph(3'')-Ib	HUN23	NODE_71_length_9159_cov_83.341445	354..1157	Aminoglycoside resistance Alternate name; aph(3'')-Ib
aph(3'')-Ib	HUNS32	NODE_72_length_6544_cov_74.107159	1434..2237	Aminoglycoside resistance Alternate name; aph(3'')-Ib
aph(3'')-Ib	JX12	NODE_72_length_6892_cov_116.157300	5906..6708	Aminoglycoside resistance Alternate name; aph(3'')-Ib
aph(3'')-Ib	JX12	NODE_72_length_6892_cov_116.157300	5905..6708	Aminoglycoside resistance Alternate name; aph(3'')-Ib
aph(3'')-Ib	JX13	NODE_72_length_7941_cov_171.042726	5110..5912	Aminoglycoside resistance Alternate name; aph(3'')-Ib
aph(3'')-Ib	JX13	NODE_72_length_7941_cov_171.042726	5110..5913	Aminoglycoside resistance Alternate name; aph(3'')-Ib
aph(3'')-Ib	HUN16	NODE_72_length_9157_cov_80.617181	353..1155	Aminoglycoside resistance Alternate name; aph(3'')-Ib
aph(3'')-Ib	HUN16	NODE_72_length_9157_cov_80.617181	352..1155	Aminoglycoside resistance Alternate name; aph(3'')-Ib
aph(3'')-Ib	LN44	NODE_73_length_11338_cov_74.326880	1790..2593	Aminoglycoside resistance Alternate name; aph(3'')-Ib
aph(3'')-Ib	AH84	NODE_73_length_7552_cov_87.398528	996..1799	Aminoglycoside resistance Alternate name; aph(3'')-Ib
aph(3'')-Ib	GS82	NODE_74_length_2924_cov_206.120126	1179..1982	Aminoglycoside resistance Alternate name; aph(3'')-Ib
aph(3'')-Ib	GZ98	NODE_74_length_4902_cov_142.829016	2816..3619	Aminoglycoside resistance Alternate name; aph(3'')-Ib
aph(3'')-Ib	JX39	NODE_74_length_6811_cov_73.069201	1435..2238	Aminoglycoside resistance Alternate name; aph(3'')-Ib
aph(3'')-Ib	SH60	NODE_75_length_13685_cov_134.970679	9612..10415	Aminoglycoside resistance Alternate name; aph(3'')-Ib
aph(3'')-Ib	FY257	NODE_75_length_1714_cov_500.868662	33..836	Aminoglycoside resistance Alternate name; aph(3'')-Ib
aph(3'')-Ib	SAX2	NODE_75_length_2373_cov_76.577526	163..966	Aminoglycoside resistance Alternate name; aph(3'')-Ib
aph(3'')-Ib	SH46	NODE_75_length_2634_cov_277.762612	912..1715	Aminoglycoside resistance Alternate name; aph(3'')-Ib
aph(3'')-Ib	SH48	NODE_76_length_13685_cov_65.658951	9612..10415	Aminoglycoside resistance Alternate name; aph(3'')-Ib
aph(3'')-Ib	NMG6	NODE_76_length_2944_cov_151.635856	920..1723	Aminoglycoside resistance Alternate name; aph(3'')-Ib
aph(3'')-Ib	SAX11	NODE_76_length_6723_cov_86.029943	6009..6647	Aminoglycoside resistance Alternate name; aph(3'')-Ib
aph(3'')-Ib	HUN11	NODE_76_length_9159_cov_101.048998	355..1157	Aminoglycoside resistance Alternate name; aph(3'')-Ib
aph(3'')-Ib	HUN11	NODE_76_length_9159_cov_101.048998	354..1157	Aminoglycoside resistance Alternate name; aph(3'')-Ib
aph(3'')-Ib	GZ34	NODE_76_length_9548_cov_64.654736	3492..4294	Aminoglycoside resistance Alternate name; aph(3'')-Ib
aph(3'')-Ib	GZ34	NODE_76_length_9548_cov_64.654736	3491..4294	Aminoglycoside resistance Alternate name; aph(3'')-Ib
aph(3'')-Ib	CQ10	NODE_77_length_1090_cov_69.961500	1..527	Aminoglycoside resistance Alternate name; aph(3'')-Ib
aph(3'')-Ib	HUN59	NODE_77_length_9159_cov_93.994715	355..1157	Aminoglycoside resistance Alternate name; aph(3'')-Ib
aph(3'')-Ib	HUN59	NODE_77_length_9159_cov_93.994715	354..1157	Aminoglycoside resistance Alternate name; aph(3'')-Ib
aph(3'')-Ib	GS100	NODE_78_length_4534_cov_55.530402	917..1720	Aminoglycoside resistance Alternate name; aph(3'')-Ib
aph(3'')-Ib	FY267	NODE_79_length_1478_cov_266.249108	1..600	Aminoglycoside resistance Alternate name; aph(3'')-Ib
aph(3'')-Ib	S47	NODE_79_length_6277_cov_717.431452	2405..3208	Aminoglycoside resistance Alternate name; aph(3'')-Ib
aph(3'')-Ib	S193	NODE_79_length_723_cov_305.701238	124..723	Aminoglycoside resistance Alternate name; aph(3'')-Ib
aph(3'')-Ib	HUN58	NODE_79_length_9159_cov_81.802026	355..1157	Aminoglycoside resistance Alternate name; aph(3'')-Ib
aph(3'')-Ib	HUN58	NODE_79_length_9159_cov_81.802026	354..1157	Aminoglycoside resistance Alternate name; aph(3'')-Ib
aph(3'')-Ib	XJ5	NODE_80_length_8180_cov_85.983586	5916..6719	Aminoglycoside resistance Alternate name; aph(3'')-Ib
aph(3'')-Ib	FY240	NODE_81_length_1116_cov_146.696824	124..926	Aminoglycoside resistance Alternate name; aph(3'')-Ib
aph(3'')-Ib	FY240	NODE_81_length_1116_cov_146.696824	124..927	Aminoglycoside resistance Alternate name; aph(3'')-Ib
aph(3'')-Ib	SD5	NODE_81_length_21384_cov_112.066786	3415..4218	Aminoglycoside resistance Alternate name; aph(3'')-Ib
aph(3'')-Ib	GX37	NODE_81_length_7071_cov_253.652130	1666..2469	Aminoglycoside resistance Alternate name; aph(3'')-Ib
aph(3'')-Ib	QH9	NODE_82_length_2944_cov_114.540984	920..1723	Aminoglycoside resistance Alternate name; aph(3'')-Ib
aph(3'')-Ib	HUBS28	NODE_82_length_4538_cov_104.292984	2815..3618	Aminoglycoside resistance Alternate name; aph(3'')-Ib
aph(3'')-Ib	GD40	NODE_82_length_4538_cov_81.585295	2814..3617	Aminoglycoside resistance Alternate name; aph(3'')-Ib
aph(3'')-Ib	GS123	NODE_82_length_6953_cov_107.285195	1462..2265	Aminoglycoside resistance Alternate name; aph(3'')-Ib
aph(3'')-Ib	S82	NODE_82_length_9155_cov_130.919696	8002..8804	Aminoglycoside resistance Alternate name; aph(3'')-Ib
aph(3'')-Ib	S82	NODE_82_length_9155_cov_130.919696	8002..8805	Aminoglycoside resistance Alternate name; aph(3'')-Ib
aph(3'')-Ib	FY44	NODE_82_length_9158_cov_132.769739	354..1156	Aminoglycoside resistance Alternate name; aph(3'')-Ib
aph(3'')-Ib	FY44	NODE_82_length_9158_cov_132.769739	353..1156	Aminoglycoside resistance Alternate name; aph(3'')-Ib
aph(3'')-Ib	HLJ64	NODE_83_length_1732_cov_232.660423	85..888	Aminoglycoside resistance Alternate name; aph(3'')-Ib
aph(3'')-Ib	FY227	NODE_83_length_4380_cov_89.937950	3415..4218	Aminoglycoside resistance Alternate name; aph(3'')-Ib
aph(3'')-Ib	FY219	NODE_83_length_4380_cov_95.839414	163..966	Aminoglycoside resistance Alternate name; aph(3'')-Ib
aph(3'')-Ib	SD7	NODE_83_length_7124_cov_122.853555	106..909	Aminoglycoside resistance Alternate name; aph(3'')-Ib
aph(3'')-Ib	XD2	NODE_83_length_723_cov_232.123839	124..723	Aminoglycoside resistance Alternate name; aph(3'')-Ib
aph(3'')-Ib	NMG29	NODE_83_length_969_cov_81.877803	443..969	Aminoglycoside resistance Alternate name; aph(3'')-Ib
aph(3'')-Ib	SD23	NODE_84_length_7910_cov_57.861228	1855..2658	Aminoglycoside resistance Alternate name; aph(3'')-Ib
aph(3'')-Ib	FY217	NODE_85_length_6277_cov_483.770000	4341..5144	Aminoglycoside resistance Alternate name; aph(3'')-Ib
aph(3'')-Ib	NMG25	NODE_86_length_1478_cov_202.290507	1..600	Aminoglycoside resistance Alternate name; aph(3'')-Ib
aph(3'')-Ib	HUBS21	NODE_86_length_1680_cov_258.706176	33..836	Aminoglycoside resistance Alternate name; aph(3'')-Ib
aph(3'')-Ib	CQ48	NODE_86_length_2183_cov_132.244539	106..909	Aminoglycoside resistance Alternate name; aph(3'')-Ib
aph(3'')-Ib	XD86	NODE_86_length_4045_cov_111.464466	2694..3496	Aminoglycoside resistance Alternate name; aph(3'')-Ib
aph(3'')-Ib	XD86	NODE_86_length_4045_cov_111.464466	2693..3496	Aminoglycoside resistance Alternate name; aph(3'')-Ib
aph(3'')-Ib	HUN77	NODE_87_length_1732_cov_262.328097	845..1648	Aminoglycoside resistance Alternate name; aph(3'')-Ib
aph(3'')-Ib	QH8	NODE_87_length_2944_cov_106.857342	920..1723	Aminoglycoside resistance Alternate name; aph(3'')-Ib
aph(3'')-Ib	FY215	NODE_87_length_913_cov_176.985646	138..913	Aminoglycoside resistance Alternate name; aph(3'')-Ib
aph(3'')-Ib	HUN80	NODE_87_length_913_cov_257.816986	138..913	Aminoglycoside resistance Alternate name; aph(3'')-Ib
aph(3'')-Ib	GS93	NODE_88_length_4537_cov_146.147309	2815..3618	Aminoglycoside resistance Alternate name; aph(3'')-Ib
aph(3'')-Ib	GZ9	NODE_88_length_9156_cov_77.197599	354..1156	Aminoglycoside resistance Alternate name; aph(3'')-Ib
aph(3'')-Ib	GZ9	NODE_88_length_9156_cov_77.197599	353..1156	Aminoglycoside resistance Alternate name; aph(3'')-Ib
aph(3'')-Ib	GZ29	NODE_89_length_9156_cov_122.478467	354..1156	Aminoglycoside resistance Alternate name; aph(3'')-Ib
aph(3'')-Ib	GZ29	NODE_89_length_9156_cov_122.478467	353..1156	Aminoglycoside resistance Alternate name; aph(3'')-Ib
aph(3'')-Ib	SC10	NODE_90_length_1732_cov_346.804834	845..1648	Aminoglycoside resistance Alternate name; aph(3'')-Ib
aph(3'')-Ib	FY261	NODE_91_length_723_cov_285.928793	1..600	Aminoglycoside resistance Alternate name; aph(3'')-Ib
aph(3'')-Ib	SD30	NODE_92_length_913_cov_203.885167	1..776	Aminoglycoside resistance Alternate name; aph(3'')-Ib
aph(3'')-Ib	HUN8	NODE_92_length_9152_cov_114.038347	8002..8804	Aminoglycoside resistance Alternate name; aph(3'')-Ib
aph(3'')-Ib	HUN8	NODE_92_length_9152_cov_114.038347	8002..8805	Aminoglycoside resistance Alternate name; aph(3'')-Ib
aph(3'')-Ib	S201	NODE_93_length_1680_cov_299.853400	845..1648	Aminoglycoside resistance Alternate name; aph(3'')-Ib
aph(3'')-Ib	SD36	NODE_93_length_913_cov_139.898325	1..776	Aminoglycoside resistance Alternate name; aph(3'')-Ib
aph(3'')-Ib	HUN15	NODE_94_length_1116_cov_186.319538	191..993	Aminoglycoside resistance Alternate name; aph(3'')-Ib
aph(3'')-Ib	HUN15	NODE_94_length_1116_cov_186.319538	190..993	Aminoglycoside resistance Alternate name; aph(3'')-Ib
aph(3'')-Ib	CQ42	NODE_94_length_2183_cov_71.519468	1275..2078	Aminoglycoside resistance Alternate name; aph(3'')-Ib
aph(3'')-Ib	GZ10	NODE_94_length_4287_cov_126.777435	356..1158	Aminoglycoside resistance Alternate name; aph(3'')-Ib
aph(3'')-Ib	GZ10	NODE_94_length_4287_cov_126.777435	355..1158	Aminoglycoside resistance Alternate name; aph(3'')-Ib
aph(3'')-Ib	SD28	NODE_94_length_737_cov_294.689394	138..737	Aminoglycoside resistance Alternate name; aph(3'')-Ib
aph(3'')-Ib	S192	NODE_95_length_1542_cov_260.604096	943..1542	Aminoglycoside resistance Alternate name; aph(3'')-Ib
aph(3'')-Ib	SC3	NODE_95_length_1732_cov_235.162538	85..888	Aminoglycoside resistance Alternate name; aph(3'')-Ib
aph(3'')-Ib	FY256	NODE_95_length_9158_cov_115.303050	8002..8804	Aminoglycoside resistance Alternate name; aph(3'')-Ib
aph(3'')-Ib	FY256	NODE_95_length_9158_cov_115.303050	8002..8805	Aminoglycoside resistance Alternate name; aph(3'')-Ib
aph(3'')-Ib	S208	NODE_96_length_1542_cov_294.319454	1..600	Aminoglycoside resistance Alternate name; aph(3'')-Ib
aph(3'')-Ib	HB28	NODE_96_length_1620_cov_137.217110	1..776	Aminoglycoside resistance Alternate name; aph(3'')-Ib
aph(3'')-Ib	S56	NODE_96_length_3413_cov_139.263189	2395..3198	Aminoglycoside resistance Alternate name; aph(3'')-Ib
aph(3'')-Ib	GZ31	NODE_96_length_5314_cov_146.887722	356..1158	Aminoglycoside resistance Alternate name; aph(3'')-Ib
aph(3'')-Ib	GZ31	NODE_96_length_5314_cov_146.887722	355..1158	Aminoglycoside resistance Alternate name; aph(3'')-Ib
aph(3'')-Ib	FY187	NODE_96_length_6486_cov_89.588547	1194..1997	Aminoglycoside resistance Alternate name; aph(3'')-Ib
aph(3'')-Ib	SD38	NODE_96_length_913_cov_136.288278	138..913	Aminoglycoside resistance Alternate name; aph(3'')-Ib
aph(3'')-Ib	AH19	NODE_97_length_6811_cov_119.678497	1435..2238	Aminoglycoside resistance Alternate name; aph(3'')-Ib
aph(3'')-Ib	SD11	NODE_98_length_1328_cov_217.355715	138..941	Aminoglycoside resistance Alternate name; aph(3'')-Ib
aph(3'')-Ib	FY229	NODE_98_length_1542_cov_124.597952	943..1542	Aminoglycoside resistance Alternate name; aph(3'')-Ib
aph(3'')-Ib	AH9	NODE_99_length_1328_cov_253.625899	138..941	Aminoglycoside resistance Alternate name; aph(3'')-Ib
aph(3'')-Ib	S198	NODE_99_length_1542_cov_316.521502	1..600	Aminoglycoside resistance Alternate name; aph(3'')-Ib
aph(3'')-Ib	FY241	NODE_99_length_1927_cov_111.344865	1019..1822	Aminoglycoside resistance Alternate name; aph(3'')-Ib
aph(3')-IIa	SAX4	NODE_101_length_3669_cov_76.404965	240..1034	Aminoglycoside resistance
aph(3')-IIa	LN32	NODE_104_length_2648_cov_76.088292	1535..2329	Aminoglycoside resistance
aph(3')-IIa	GS99	NODE_104_length_6285_cov_169.169137	319..1113	Aminoglycoside resistance
aph(3')-IIa	LN10	NODE_108_length_2648_cov_68.675613	1535..2329	Aminoglycoside resistance
aph(3')-IIa	GS105	NODE_110_length_4337_cov_189.852347	3225..4019	Aminoglycoside resistance
aph(3')-IIa	AH19	NODE_110_length_4338_cov_90.042244	320..1114	Aminoglycoside resistance
aph(3')-IIa	FY45	NODE_111_length_2649_cov_150.962286	319..1113	Aminoglycoside resistance
aph(3')-IIa	NMG7	NODE_116_length_2650_cov_103.031092	320..1114	Aminoglycoside resistance
aph(3')-IIa	S199	NODE_153_length_2648_cov_58.749125	1535..2329	Aminoglycoside resistance
aph(3')-IIa	SD15	NODE_28_length_14507_cov_86.664172	320..1114	Aminoglycoside resistance
aph(3')-IIa	AH36	NODE_29_length_14507_cov_130.992585	320..1114	Aminoglycoside resistance
aph(3')-IIa	S47	NODE_31_length_49395_cov_73.832414	321..1115	Aminoglycoside resistance
aph(3')-IIa	FY241	NODE_34_length_41487_cov_240.338638	40362..41156	Aminoglycoside resistance
aph(3')-IIa	GS100	NODE_37_length_45931_cov_60.517076	321..1115	Aminoglycoside resistance
aph(3')-IIa	HUN19	NODE_38_length_14732_cov_110.716274	320..1114	Aminoglycoside resistance
aph(3')-IIa	CQ17	NODE_41_length_14891_cov_102.313622	1537..2331	Aminoglycoside resistance
aph(3')-IIa	CQ20	NODE_44_length_19574_cov_118.697851	3974..4768	Aminoglycoside resistance
aph(3')-IIa	GZ43	NODE_46_length_16232_cov_66.318353	15119..15913	Aminoglycoside resistance
aph(3')-IIa	AH12	NODE_46_length_2649_cov_88.043546	320..1114	Aminoglycoside resistance
aph(3')-IIa	CQ15	NODE_50_length_4689_cov_96.782524	2360..3154	Aminoglycoside resistance
aph(3')-IIa	GS207	NODE_51_length_10765_cov_113.645210	321..1115	Aminoglycoside resistance
aph(3')-IIa	FY230	NODE_52_length_22178_cov_129.096240	21065..21859	Aminoglycoside resistance
aph(3')-IIa	HUN45	NODE_54_length_15872_cov_88.340044	14758..15552	Aminoglycoside resistance
aph(3')-IIa	CQ4	NODE_54_length_7090_cov_109.960502	2323..3117	Aminoglycoside resistance
aph(3')-IIa	CQ9	NODE_55_length_7127_cov_149.497730	3974..4768	Aminoglycoside resistance
aph(3')-IIa	CQ3	NODE_56_length_16678_cov_195.646166	12561..13355	Aminoglycoside resistance
aph(3')-IIa	S87	NODE_57_length_13634_cov_251.393524	12521..13315	Aminoglycoside resistance
aph(3')-IIa	AH28	NODE_57_length_4338_cov_57.387468	3225..4019	Aminoglycoside resistance
aph(3')-IIa	NMG22	NODE_58_length_5444_cov_93.945966	4331..5125	Aminoglycoside resistance
aph(3')-IIa	SH52	NODE_60_length_2650_cov_131.562767	1537..2331	Aminoglycoside resistance
aph(3')-IIa	SH56	NODE_65_length_2650_cov_123.697241	320..1114	Aminoglycoside resistance
aph(3')-IIa	NMG25	NODE_65_length_4223_cov_62.793054	319..1113	Aminoglycoside resistance
aph(3')-IIa	S56	NODE_67_length_14732_cov_194.400068	320..1114	Aminoglycoside resistance
aph(3')-IIa	CQ27	NODE_67_length_6886_cov_110.046262	2047..2841	Aminoglycoside resistance
aph(3')-IIa	NMG6	NODE_68_length_5443_cov_152.193999	320..1114	Aminoglycoside resistance
aph(3')-IIa	NMG42	NODE_69_length_5443_cov_97.781960	320..1114	Aminoglycoside resistance
aph(3')-IIa	SD37	NODE_73_length_2649_cov_159.115863	319..1113	Aminoglycoside resistance
aph(3')-IIa	ZJ20	NODE_75_length_18393_cov_97.560111	2323..3117	Aminoglycoside resistance
aph(3')-IIa	CQ74	NODE_76_length_2650_cov_118.563545	1536..2330	Aminoglycoside resistance
aph(3')-IIa	SD28	NODE_76_length_2650_cov_84.229693	1537..2331	Aminoglycoside resistance
aph(3')-IIa	FY228	NODE_79_length_4223_cov_65.829233	320..1114	Aminoglycoside resistance
aph(3')-IIa	XJ32	NODE_83_length_2650_cov_87.329965	320..1114	Aminoglycoside resistance
aph(3')-IIa	CQ8	NODE_83_length_6378_cov_103.015077	1611..2405	Aminoglycoside resistance
aph(3')-IIa	S147	NODE_84_length_2650_cov_156.912553	320..1114	Aminoglycoside resistance
aph(3')-IIa	CQ73	NODE_85_length_2647_cov_96.087549	320..1114	Aminoglycoside resistance
aph(3')-IIa	CQ75	NODE_86_length_2647_cov_210.110506	1534..2328	Aminoglycoside resistance
aph(3')-IIa	S195	NODE_86_length_2649_cov_85.376750	320..1114	Aminoglycoside resistance
aph(3')-IIa	S82	NODE_86_length_7342_cov_7201.782519	319..1113	Aminoglycoside resistance
aph(3')-IIa	HUN56	NODE_88_length_2651_cov_71.890054	1537..2331	Aminoglycoside resistance
aph(3')-IIa	NMG48	NODE_89_length_5443_cov_131.199217	320..1114	Aminoglycoside resistance
aph(3')-IIa	CQ80	NODE_90_length_2647_cov_200.996498	320..1114	Aminoglycoside resistance
aph(3')-IIa	CQ92	NODE_91_length_2659_cov_91.971727	332..1126	Aminoglycoside resistance
aph(3')-IIa	NMG12	NODE_91_length_5443_cov_93.517331	4330..5124	Aminoglycoside resistance
aph(3')-IIa	FY183	NODE_92_length_2648_cov_81.593154	1535..2329	Aminoglycoside resistance
aph(3')-IIa	HUBJ12	NODE_92_length_2650_cov_171.499417	320..1114	Aminoglycoside resistance
aph(3')-IIa	XD3	NODE_94_length_2650_cov_89.931597	1537..2331	Aminoglycoside resistance
aph(3')-IIa	ZJ1	NODE_98_length_3766_cov_58.740851	2653..3447	Aminoglycoside resistance
aph(3')-VI	XD35	5 length=85891 depth=1.19x circular=true	13966..14745	Aminoglycoside resistance
aph(3')-VI	E_coli_RXD10	E_coli_RXD10_ctg0064 Escherichia coli ATCC 25922	6831..7610	Aminoglycoside resistance
aph(3')-VI	XD100	E_coli_RXD100_ctg0072 Escherichia coli ATCC 25922	8979..9758	Aminoglycoside resistance
aph(3')-VI	XD11	E_coli_RXD11_ctg0080 Escherichia coli ATCC 25922	6788..7567	Aminoglycoside resistance
aph(3')-VI	XD115	E_coli_RXD115_ctg0064 Escherichia coli ATCC 25922	2318..3097	Aminoglycoside resistance
aph(3')-VI	XD33	E_coli_RXD33_ctg0083 Escherichia coli ATCC 25922	6788..7567	Aminoglycoside resistance
aph(3')-VI	XD36	E_coli_RXD36_ctg0079 Escherichia coli ATCC 25922	6788..7567	Aminoglycoside resistance
aph(3')-VI	E_coli_RXD5	E_coli_RXD5_ctg0066	6831..7610	Aminoglycoside resistance
aph(3')-VI	XD97	E_coli_RXD97_ctg0041 Escherichia coli ATCC 25922	6618..7397	Aminoglycoside resistance
aph(3')-VI	XD38	NODE_33_length_9372_cov_58.904680	6318..7097	Aminoglycoside resistance
aph(3')-VI	S99	NODE_33_length_9801_cov_132.184698	2277..3056	Aminoglycoside resistance
aph(3')-VI	S104	NODE_40_length_6700_cov_95.867281	3648..4427	Aminoglycoside resistance
aph(3')-VI	S103	NODE_46_length_9546_cov_112.799979	6491..7270	Aminoglycoside resistance
aph(3')-VI	XD39	NODE_54_length_9372_cov_64.455083	2276..3055	Aminoglycoside resistance
aph(3')-VI	S95	NODE_55_length_9829_cov_79.759742	6775..7554	Aminoglycoside resistance
aph(3')-VI	XD40	NODE_56_length_9372_cov_87.826358	2276..3055	Aminoglycoside resistance
aph(3')-VI	XD101	NODE_58_length_6701_cov_62.444143	3649..4428	Aminoglycoside resistance
aph(3')-VI	XD34	NODE_58_length_9372_cov_98.086068	2276..3055	Aminoglycoside resistance
aph(3')-VI	S89	NODE_58_length_9829_cov_101.480927	6775..7554	Aminoglycoside resistance
aph(3')-VI	XD23	NODE_63_length_9517_cov_77.801377	6462..7241	Aminoglycoside resistance
aph(3')-VI	S91	NODE_64_length_9518_cov_109.841119	2277..3056	Aminoglycoside resistance
aph(3')-VI	XD37	NODE_66_length_9515_cov_69.138271	6461..7240	Aminoglycoside resistance
aph(3')-VI	S73	NODE_89_length_1242_cov_1.809442	1..481	Aminoglycoside resistance
aph(4)-Ia	XD35	2 length=244138 depth=1.09x circular=true	107436..108461	Aminoglycoside resistance
aph(4)-Ia	XD35	3 length=119611 depth=1.19x	96382..97407	Aminoglycoside resistance
aph(4)-Ia	E_coli_RXD10	E_coli_RXD10_ctg0065 Escherichia coli ATCC 25922	7044..8069	Aminoglycoside resistance
aph(4)-Ia	XD11	E_coli_RXD11_ctg0083 Escherichia coli ATCC 25922	7051..8076	Aminoglycoside resistance
aph(4)-Ia	XD33	E_coli_RXD33_ctg0085 Escherichia coli ATCC 25922	7051..8076	Aminoglycoside resistance
aph(4)-Ia	XD36	E_coli_RXD36_ctg0081 Escherichia coli ATCC 25922	7136..8161	Aminoglycoside resistance
aph(4)-Ia	E_coli_RXD5	E_coli_RXD5_ctg0068	7044..8069	Aminoglycoside resistance
aph(4)-Ia	S79	NODE_105_length_3491_cov_147.375513	1132..2157	Aminoglycoside resistance
aph(4)-Ia	S61	NODE_106_length_3491_cov_136.848858	1335..2360	Aminoglycoside resistance
aph(4)-Ia	GZ31	NODE_109_length_3842_cov_137.882869	1130..2155	Aminoglycoside resistance
aph(4)-Ia	CQ72	NODE_110_length_3489_cov_95.340270	1130..2155	Aminoglycoside resistance
aph(4)-Ia	S194	NODE_118_length_3489_cov_98.866940	1130..2155	Aminoglycoside resistance
aph(4)-Ia	AH96	NODE_35_length_41760_cov_167.084183	1133..2158	Aminoglycoside resistance
aph(4)-Ia	S95	NODE_35_length_52634_cov_92.072797	1133..2158	Aminoglycoside resistance
aph(4)-Ia	HB42	NODE_36_length_32295_cov_65.553045	30138..31163	Aminoglycoside resistance
aph(4)-Ia	HUN20	NODE_37_length_9156_cov_93.790946	7000..8025	Aminoglycoside resistance
aph(4)-Ia	S104	NODE_38_length_9159_cov_144.092160	7003..8028	Aminoglycoside resistance
aph(4)-Ia	GZ40	NODE_42_length_10665_cov_106.756233	1133..2158	Aminoglycoside resistance
aph(4)-Ia	SC1	NODE_42_length_7063_cov_84.310335	1133..2158	Aminoglycoside resistance
aph(4)-Ia	HUN29	NODE_44_length_8226_cov_88.954350	1133..2158	Aminoglycoside resistance
aph(4)-Ia	HUN27	NODE_44_length_8226_cov_91.911155	6069..7094	Aminoglycoside resistance
aph(4)-Ia	HUN4	NODE_47_length_9159_cov_91.422814	1133..2158	Aminoglycoside resistance
aph(4)-Ia	HUBJ8	NODE_50_length_8100_cov_103.186589	6176..6969	Aminoglycoside resistance
aph(4)-Ia	HUN24	NODE_50_length_9159_cov_88.565294	1132..2157	Aminoglycoside resistance
aph(4)-Ia	XD1	NODE_51_length_5759_cov_114.643435	3602..4627	Aminoglycoside resistance
aph(4)-Ia	XD2	NODE_51_length_7201_cov_105.569483	5044..6069	Aminoglycoside resistance
aph(4)-Ia	XD101	NODE_52_length_9159_cov_143.388351	1133..2158	Aminoglycoside resistance
aph(4)-Ia	HUN115	NODE_53_length_9159_cov_90.307311	7003..8028	Aminoglycoside resistance
aph(4)-Ia	FY261	NODE_54_length_7200_cov_90.455566	5044..6069	Aminoglycoside resistance
aph(4)-Ia	FY257	NODE_55_length_7200_cov_164.222097	5044..6069	Aminoglycoside resistance
aph(4)-Ia	S89	NODE_56_length_10364_cov_155.264897	1133..2158	Aminoglycoside resistance
aph(4)-Ia	FY240	NODE_56_length_7014_cov_63.405074	4858..5883	Aminoglycoside resistance
aph(4)-Ia	S49	NODE_56_length_9158_cov_151.995155	7002..8027	Aminoglycoside resistance
aph(4)-Ia	FY267	NODE_57_length_7200_cov_89.637512	5044..6069	Aminoglycoside resistance
aph(4)-Ia	FY66	NODE_57_length_9158_cov_170.435194	1132..2157	Aminoglycoside resistance
aph(4)-Ia	NMG24	NODE_58_length_20439_cov_72.424025	18282..19307	Aminoglycoside resistance
aph(4)-Ia	SAX2	NODE_58_length_7278_cov_78.739619	1133..2158	Aminoglycoside resistance
aph(4)-Ia	S205	NODE_58_length_9160_cov_134.493119	1133..2158	Aminoglycoside resistance
aph(4)-Ia	HUN15	NODE_59_length_7134_cov_94.295876	4980..6005	Aminoglycoside resistance
aph(4)-Ia	AH28	NODE_60_length_3489_cov_93.107855	1130..2155	Aminoglycoside resistance
aph(4)-Ia	SD1	NODE_61_length_15052_cov_76.365275	12898..13923	Aminoglycoside resistance
aph(4)-Ia	XJ12	NODE_61_length_8101_cov_106.220962	1133..1926	Aminoglycoside resistance
aph(4)-Ia	XJ13	NODE_61_length_8101_cov_106.354811	6176..6969	Aminoglycoside resistance
aph(4)-Ia	XJ9	NODE_62_length_8101_cov_97.888709	1133..1926	Aminoglycoside resistance
aph(4)-Ia	XJ4	NODE_63_length_8101_cov_92.070289	1133..1926	Aminoglycoside resistance
aph(4)-Ia	HUN14	NODE_65_length_9159_cov_82.462013	1133..2158	Aminoglycoside resistance
aph(4)-Ia	S91	NODE_65_length_9160_cov_164.787295	7003..8028	Aminoglycoside resistance
aph(4)-Ia	S70	NODE_66_length_9157_cov_160.501432	7001..8026	Aminoglycoside resistance
aph(4)-Ia	SHB15	NODE_67_length_8226_cov_207.718861	6069..7094	Aminoglycoside resistance
aph(4)-Ia	JX10	NODE_67_length_9158_cov_62.039533	1132..2157	Aminoglycoside resistance
aph(4)-Ia	CQ78	NODE_68_length_8100_cov_75.135859	6176..6969	Aminoglycoside resistance
aph(4)-Ia	YN13	NODE_69_length_8226_cov_120.005890	1133..2158	Aminoglycoside resistance
aph(4)-Ia	SAX15	NODE_70_length_3492_cov_92.483748	1133..2158	Aminoglycoside resistance
aph(4)-Ia	S67	NODE_71_length_9159_cov_114.133671	1132..2157	Aminoglycoside resistance
aph(4)-Ia	HUN23	NODE_71_length_9159_cov_83.341445	7002..8027	Aminoglycoside resistance
aph(4)-Ia	SHB6	NODE_72_length_7063_cov_70.924279	1133..2158	Aminoglycoside resistance
aph(4)-Ia	HUN16	NODE_72_length_9157_cov_80.617181	7000..8025	Aminoglycoside resistance
aph(4)-Ia	LN42	NODE_73_length_7014_cov_106.763298	4858..5883	Aminoglycoside resistance
aph(4)-Ia	SAX16	NODE_74_length_3392_cov_102.453997	1131..1924	Aminoglycoside resistance
aph(4)-Ia	S192	NODE_75_length_3489_cov_273.375733	1335..2360	Aminoglycoside resistance
aph(4)-Ia	FY183	NODE_75_length_5685_cov_153.792796	1..828	Aminoglycoside resistance
aph(4)-Ia	S196	NODE_76_length_6913_cov_184.172908	1130..2155	Aminoglycoside resistance
aph(4)-Ia	XJ15	NODE_76_length_7201_cov_168.568080	5044..6069	Aminoglycoside resistance
aph(4)-Ia	CQ79	NODE_76_length_8100_cov_112.452449	6176..6969	Aminoglycoside resistance
aph(4)-Ia	HUN11	NODE_76_length_9159_cov_101.048998	7002..8027	Aminoglycoside resistance
aph(4)-Ia	HUN59	NODE_77_length_9159_cov_93.994715	7002..8027	Aminoglycoside resistance
aph(4)-Ia	S208	NODE_78_length_3489_cov_260.960141	1335..2360	Aminoglycoside resistance
aph(4)-Ia	S206	NODE_78_length_7015_cov_162.848948	4858..5883	Aminoglycoside resistance
aph(4)-Ia	XJ17	NODE_79_length_8226_cov_97.710271	6069..7094	Aminoglycoside resistance
aph(4)-Ia	HUN58	NODE_79_length_9159_cov_81.802026	7002..8027	Aminoglycoside resistance
aph(4)-Ia	FY229	NODE_81_length_3489_cov_149.230363	1130..2155	Aminoglycoside resistance
aph(4)-Ia	SAX4	NODE_81_length_8224_cov_126.684546	6069..7094	Aminoglycoside resistance
aph(4)-Ia	FY74	NODE_81_length_9570_cov_107.040135	7392..8417	Aminoglycoside resistance
aph(4)-Ia	S198	NODE_82_length_3489_cov_305.202227	1130..2155	Aminoglycoside resistance
aph(4)-Ia	S82	NODE_82_length_9155_cov_130.919696	1132..2157	Aminoglycoside resistance
aph(4)-Ia	FY44	NODE_82_length_9158_cov_132.769739	7001..8026	Aminoglycoside resistance
aph(4)-Ia	S191	NODE_83_length_3839_cov_188.838650	1130..2155	Aminoglycoside resistance
aph(4)-Ia	FY268	NODE_84_length_3489_cov_91.592321	1335..2360	Aminoglycoside resistance
aph(4)-Ia	SD7	NODE_84_length_6938_cov_88.528203	1133..1926	Aminoglycoside resistance
aph(4)-Ia	S195	NODE_88_length_2560_cov_125.064438	1130..2155	Aminoglycoside resistance
aph(4)-Ia	FY241	NODE_88_length_3489_cov_113.598769	1335..2360	Aminoglycoside resistance
aph(4)-Ia	GZ9	NODE_88_length_9156_cov_77.197599	7001..8026	Aminoglycoside resistance
aph(4)-Ia	GZ29	NODE_89_length_9156_cov_122.478467	7001..8026	Aminoglycoside resistance
aph(4)-Ia	HB33	NODE_91_length_3489_cov_167.504396	1335..2360	Aminoglycoside resistance
aph(4)-Ia	HB36	NODE_91_length_3489_cov_167.504396	1335..2360	Aminoglycoside resistance
aph(4)-Ia	FY253	NODE_92_length_3489_cov_59.840563	1335..2360	Aminoglycoside resistance
aph(4)-Ia	HUN8	NODE_92_length_9152_cov_114.038347	1132..2157	Aminoglycoside resistance
aph(4)-Ia	GS61	NODE_93_length_3489_cov_133.622802	1335..2360	Aminoglycoside resistance
aph(4)-Ia	HLJ34	NODE_93_length_8400_cov_105.020786	1131..2156	Aminoglycoside resistance
aph(4)-Ia	FY256	NODE_95_length_9158_cov_115.303050	1132..2157	Aminoglycoside resistance
aph(4)-Ia	GZ10	NODE_98_length_3920_cov_131.022118	1766..2791	Aminoglycoside resistance
aph(6)-Id	XD35	2 length=244138 depth=1.09x circular=true	101591..102427	Aminoglycoside resistance Alternate name; aph(6)-Id
aph(6)-Id	E_coli_RXD10	E_coli_RXD10_ctg0065 Escherichia coli ATCC 25922	1199..2035	Aminoglycoside resistance Alternate name; aph(6)-Id
aph(6)-Id	XD11	E_coli_RXD11_ctg0083 Escherichia coli ATCC 25922	1206..2042	Aminoglycoside resistance Alternate name; aph(6)-Id
aph(6)-Id	XD12	E_coli_RXD12_ctg0070 Escherichia coli ATCC 25922	4774..5610	Aminoglycoside resistance Alternate name; aph(6)-Id
aph(6)-Id	XD20	E_coli_RXD20_ctg0069 Escherichia coli ATCC 25922	4774..5610	Aminoglycoside resistance Alternate name; aph(6)-Id
aph(6)-Id	XD24	E_coli_RXD24_ctg0072 Escherichia coli ATCC 25922	4774..5610	Aminoglycoside resistance Alternate name; aph(6)-Id
aph(6)-Id	XD33	E_coli_RXD33_ctg0085 Escherichia coli ATCC 25922	1206..2042	Aminoglycoside resistance Alternate name; aph(6)-Id
aph(6)-Id	XD36	E_coli_RXD36_ctg0081 Escherichia coli ATCC 25922	1291..2127	Aminoglycoside resistance Alternate name; aph(6)-Id
aph(6)-Id	E_coli_RXD5	E_coli_RXD5_ctg0068	1199..2035	Aminoglycoside resistance Alternate name; aph(6)-Id
aph(6)-Id	SH22	NODE_10_length_164767_cov_107.578790	163749..164585	Aminoglycoside resistance Alternate name; aph(6)-Id
aph(6)-Id	AH90	NODE_10_length_192098_cov_109.725290	129384..130220	Aminoglycoside resistance Alternate name; aph(6)-Id
aph(6)-Id	SD38	NODE_100_length_781_cov_141.558239	84..781	Aminoglycoside resistance Alternate name; aph(6)-Id
aph(6)-Id	YN34	NODE_101_length_1626_cov_189.232408	889..1551	Aminoglycoside resistance Alternate name; aph(6)-Id
aph(6)-Id	HB84	NODE_102_length_2552_cov_198.252525	183..1019	Aminoglycoside resistance Alternate name; aph(6)-Id
aph(6)-Id	GS105	NODE_102_length_6183_cov_173.214543	1554..2390	Aminoglycoside resistance Alternate name; aph(6)-Id
aph(6)-Id	S191	NODE_103_length_1718_cov_322.632541	107..943	Aminoglycoside resistance Alternate name; aph(6)-Id
aph(6)-Id	GS138	NODE_103_length_3113_cov_134.532609	1388..2224	Aminoglycoside resistance Alternate name; aph(6)-Id
aph(6)-Id	HUN15	NODE_103_length_818_cov_197.268556	1..712	Aminoglycoside resistance Alternate name; aph(6)-Id
aph(6)-Id	HUN7	NODE_104_length_4341_cov_130.648452	1156..1992	Aminoglycoside resistance Alternate name; aph(6)-Id
aph(6)-Id	ZJ1	NODE_105_length_2688_cov_115.456147	755..1591	Aminoglycoside resistance Alternate name; aph(6)-Id
aph(6)-Id	GS99	NODE_105_length_6183_cov_130.774648	3794..4630	Aminoglycoside resistance Alternate name; aph(6)-Id
aph(6)-Id	HLJ5	NODE_105_length_754_cov_534.062038	43..754	Aminoglycoside resistance Alternate name; aph(6)-Id
aph(6)-Id	CQ72	NODE_106_length_4285_cov_96.046578	1156..1992	Aminoglycoside resistance Alternate name; aph(6)-Id
aph(6)-Id	FY183	NODE_107_length_1478_cov_286.201999	43..879	Aminoglycoside resistance Alternate name; aph(6)-Id
aph(6)-Id	YN39	NODE_107_length_1626_cov_120.052292	76..738	Aminoglycoside resistance Alternate name; aph(6)-Id
aph(6)-Id	FY45	NODE_107_length_3299_cov_299.160459	1555..2391	Aminoglycoside resistance Alternate name; aph(6)-Id
aph(6)-Id	XD37	NODE_112_length_1198_cov_351.510259	354..1190	Aminoglycoside resistance Alternate name; aph(6)-Id
aph(6)-Id	XJ15	NODE_112_length_754_cov_318.456425	1..712	Aminoglycoside resistance Alternate name; aph(6)-Id
aph(6)-Id	SD11	NODE_112_length_804_cov_221.312242	107..804	Aminoglycoside resistance Alternate name; aph(6)-Id
aph(6)-Id	S196	NODE_113_length_1283_cov_350.801824	600..1283	Aminoglycoside resistance Alternate name; aph(6)-Id
aph(6)-Id	FY251	NODE_113_length_5539_cov_79.088612	1346..2176	Aminoglycoside resistance Alternate name; aph(6)-Id
aph(6)-Id	S206	NODE_114_length_754_cov_313.016248	1..712	Aminoglycoside resistance Alternate name; aph(6)-Id
aph(6)-Id	FY74	NODE_115_length_1927_cov_75.952973	909..1745	Aminoglycoside resistance Alternate name; aph(6)-Id
aph(6)-Id	SD35	NODE_115_length_781_cov_157.799716	84..781	Aminoglycoside resistance Alternate name; aph(6)-Id
aph(6)-Id	NMG7	NODE_117_length_2573_cov_208.471554	1191..2027	Aminoglycoside resistance Alternate name; aph(6)-Id
aph(6)-Id	S195	NODE_117_length_754_cov_254.861152	1..712	Aminoglycoside resistance Alternate name; aph(6)-Id
aph(6)-Id	LN42	NODE_118_length_1478_cov_294.904354	600..1436	Aminoglycoside resistance Alternate name; aph(6)-Id
aph(6)-Id	GZ86	NODE_12_length_191815_cov_128.849513	129383..130219	Aminoglycoside resistance Alternate name; aph(6)-Id
aph(6)-Id	CQ77	NODE_120_length_6673_cov_70.580200	3624..4454	Aminoglycoside resistance Alternate name; aph(6)-Id
aph(6)-Id	S75	NODE_121_length_720_cov_237.374806	1..712	Aminoglycoside resistance Alternate name; aph(6)-Id
aph(6)-Id	CQ7	NODE_123_length_2039_cov_95.765545	430..1266	Aminoglycoside resistance Alternate name; aph(6)-Id
aph(6)-Id	S56	NODE_124_length_740_cov_294.800905	1..698	Aminoglycoside resistance Alternate name; aph(6)-Id
aph(6)-Id	NMG39	NODE_125_length_836_cov_175.204216	1..729	Aminoglycoside resistance Alternate name; aph(6)-Id
aph(6)-Id	SD12	NODE_127_length_2102_cov_119.095802	358..1194	Aminoglycoside resistance Alternate name; aph(6)-Id
aph(6)-Id	NMG32	NODE_131_length_1232_cov_284.039827	354..1190	Aminoglycoside resistance Alternate name; aph(6)-Id
aph(6)-Id	XJ48	NODE_136_length_730_cov_201.413476	2..730	Aminoglycoside resistance Alternate name; aph(6)-Id
aph(6)-Id	GS61	NODE_137_length_754_cov_240.778434	43..754	Aminoglycoside resistance Alternate name; aph(6)-Id
aph(6)-Id	CQ16	NODE_138_length_2030_cov_99.613660	430..1266	Aminoglycoside resistance Alternate name; aph(6)-Id
aph(6)-Id	CQ1	NODE_138_length_2040_cov_142.242995	431..1267	Aminoglycoside resistance Alternate name; aph(6)-Id
aph(6)-Id	SH43	NODE_14_length_106303_cov_98.312965	28650..29480	Aminoglycoside resistance Alternate name; aph(6)-Id
aph(6)-Id	JX23	NODE_14_length_111141_cov_125.561118	107576..108412	Aminoglycoside resistance Alternate name; aph(6)-Id
aph(6)-Id	FY268	NODE_140_length_627_cov_238.352727	1..627	Aminoglycoside resistance Alternate name; aph(6)-Id
aph(6)-Id	NMG48	NODE_142_length_1232_cov_225.347186	354..1190	Aminoglycoside resistance Alternate name; aph(6)-Id
aph(6)-Id	FY197	NODE_142_length_1718_cov_218.914686	107..943	Aminoglycoside resistance Alternate name; aph(6)-Id
aph(6)-Id	CQ14	NODE_142_length_2039_cov_98.852701	430..1266	Aminoglycoside resistance Alternate name; aph(6)-Id
aph(6)-Id	S61	NODE_142_length_823_cov_293.628686	1..712	Aminoglycoside resistance Alternate name; aph(6)-Id
aph(6)-Id	S79	NODE_143_length_823_cov_307.335121	1..712	Aminoglycoside resistance Alternate name; aph(6)-Id
aph(6)-Id	JX18	NODE_148_length_1547_cov_270.015646	358..1194	Aminoglycoside resistance Alternate name; aph(6)-Id
aph(6)-Id	AH47	NODE_15_length_133509_cov_114.651111	3291..4127	Aminoglycoside resistance Alternate name; aph(6)-Id
aph(6)-Id	FY237	NODE_150_length_2409_cov_118.700686	140..976	Aminoglycoside resistance Alternate name; aph(6)-Id
aph(6)-Id	FY253	NODE_158_length_627_cov_241.450909	1..627	Aminoglycoside resistance Alternate name; aph(6)-Id
aph(6)-Id	SH7	NODE_16_length_106303_cov_79.795436	76824..77654	Aminoglycoside resistance Alternate name; aph(6)-Id
aph(6)-Id	NMG46	NODE_175_length_1232_cov_206.971429	354..1190	Aminoglycoside resistance Alternate name; aph(6)-Id
aph(6)-Id	FY249	NODE_184_length_1478_cov_318.006424	600..1436	Aminoglycoside resistance Alternate name; aph(6)-Id
aph(6)-Id	S199	NODE_2_length_169301_cov_134.730749	118636..119472	Aminoglycoside resistance Alternate name; aph(6)-Id
aph(6)-Id	HUN127	NODE_2_length_264008_cov_72.488207	17620..18450	Aminoglycoside resistance Alternate name; aph(6)-Id
aph(6)-Id	SH36	NODE_21_length_88154_cov_121.752308	58675..59505	Aminoglycoside resistance Alternate name; aph(6)-Id
aph(6)-Id	S158	NODE_22_length_72772_cov_149.823028	69842..70678	Aminoglycoside resistance Alternate name; aph(6)-Id
aph(6)-Id	XD171	NODE_22_length_72772_cov_89.223138	69842..70678	Aminoglycoside resistance Alternate name; aph(6)-Id
aph(6)-Id	GZ12	NODE_23_length_48639_cov_87.296199	358..1194	Aminoglycoside resistance Alternate name; aph(6)-Id
aph(6)-Id	HUNS46	NODE_23_length_71552_cov_65.439412	3468..4304	Aminoglycoside resistance Alternate name; aph(6)-Id
aph(6)-Id	LN69	NODE_24_length_61400_cov_101.233273	26427..27257	Aminoglycoside resistance Alternate name; aph(6)-Id
aph(6)-Id	SH30	NODE_24_length_68502_cov_87.865955	33527..34357	Aminoglycoside resistance Alternate name; aph(6)-Id
[truncated: 5,909 more rows]
