# Supplementary material for: Antimicrobial resistance and population genomics of extensively drug resistant Escherichia coli in pig farms in mainland China: a national wide epidemiological and microbiological study
Source: Research Square preprint supplement (doi:10.21203/rs.3.rs-502741/v1), 2021-05-14
Supplement: Supplementary file 6 [file 81905998a292ea89c2673245.xlsx]

## Sheet: Sheet1
Strain	Provinces of isolation	O-serogroup	H-Serotype	Sequence type	GenBank accession number
AH1	Anhui	O173	H28	1196	JAEOBM000000000
AH10	Anhui	O9a	H30	361	JAEOBN000000000
AH11	Anhui	-	H10	1258	JAEOBO000000000
AH12	Anhui	O18ac	H45	224	JAEOBP000000000
AH13	Anhui	-	H45	155	JAEOBQ000000000
AH15	Anhui	-	H12	-	JAEOBR000000000
AH16	Anhui	O9a	H30	361	JAEOBS000000000
AH19	Anhui	O98	H12	10	JAEOBT000000000
AH20	Anhui	-	H10	1258	JAEOBU000000000
AH22	Anhui	-	H10	1258	JAEOBV000000000
AH24	Anhui	O98	H49	20	JAEOBW000000000
AH27	Anhui	O9a	H30	361	JAEOBX000000000
AH28	Anhui	O28ab	H21	101	JAEOBY000000000
AH29	Anhui	O86	H32	5133	JAEOBZ000000000
AH36	Anhui	O18ac	H45	224	JAEOCA000000000
AH37	Anhui	O9a	H30	361	JAEOCB000000000
AH4	Anhui	O9a	H30	361	JAEOCC000000000
AH40	Anhui	O9a	H30	361	JAEOCD000000000
AH41	Anhui	O98	H49	20	JAEOCE000000000
AH47	Anhui	O153	H40	1081	JAEOCF000000000
AH48	Anhui	O89	H38	-	JAEOCG000000000
AH8	Anhui	O9a	H30	361	JAEOCH000000000
AH84	Anhui	O153	H21	101	JAEOCI000000000
AH88	Anhui	O180	H14	1081	JAEOCJ000000000
AH9	Anhui	O101	H9	10	JAEOCK000000000
AH90	Anhui	O136	H40	1081	JAEOCL000000000
AH91	Anhui	O163	H16	336	JAEOCM000000000
AH96	Anhui	O6	H10	-	JAEOCN000000000
BJ21	Beijing	-	H37	48	JAEOCO000000000
BJ25	Beijing	O161	H4	117	JAEOCP000000000
BJ32	Beijing	O6	H10	43	JAEOCQ000000000
CQ1	Chongqing	-	H5	206	JAEOCR000000000
CQ10	Chongqing	O173	H28	1196	JAEOCS000000000
CQ12	Chongqing	O73	H31	-	JAEOCT000000000
CQ14	Chongqing	-	H5	206	JAEOCU000000000
CQ15	Chongqing	O100	H28	101	JAEOCV000000000
CQ16	Chongqing	-	H5	206	JAEOCW000000000
CQ17	Chongqing	O100	H28	101	JAEOCX000000000
CQ2	Chongqing	O73	H31	-	JAEOCY000000000
CQ20	Chongqing	O48	H34	5229	JAEOCZ000000000
CQ21	Chongqing	O9a	H9	10	JAEODA000000000
CQ22	Chongqing	O9a	H9	10	JAEODB000000000
CQ25	Chongqing	O9a	H9	10	JAEODC000000000
CQ26	Chongqing	O9a	H9	10	JAEODD000000000
CQ27	Chongqing	O28ac/O42	H32	10	JAEODE000000000
CQ28	Chongqing	O9a	H9	10	JAEODF000000000
CQ29	Chongqing	O9a	H9	10	JAEODG000000000
CQ3	Chongqing	O101	H9	744	JAEODH000000000
CQ30	Chongqing	O9a	H9	10	JAEODI000000000
CQ31	Chongqing	O8	H7	1642	JAEODJ000000000
CQ32	Chongqing	O9a	H9	10	JAEODK000000000
CQ33	Chongqing	O9a	H9	10	JAEODL000000000
CQ34	Chongqing	O9a	H9	10	JAEODM000000000
CQ35	Chongqing	O9a	H9	10	JAEODN000000000
CQ36	Chongqing	O21	H21	101	JAEODO000000000
CQ4	Chongqing	O48	H34	5229	JAEODP000000000
CQ42	Chongqing	O178	H7	5415	JAEODQ000000000
CQ46	Chongqing	O9a	H4	3014	JAEODR000000000
CQ48	Chongqing	O178	H7	5415	JAEODS000000000
CQ51	Chongqing	O9a	H4	3014	JAEODT000000000
CQ52	Chongqing	O8	H19	162	JAEODU000000000
CQ59	Chongqing	O101	H9	744	JAEODV000000000
CQ63	Chongqing	-	H32	10	JAEODW000000000
CQ66	Chongqing	O96	H5	206	JAEODX000000000
CQ67	Chongqing	-	H20	6778	JAEODY000000000
CQ69	Chongqing	O10	H5	10	JAEODZ000000000
CQ7	Chongqing	-	H32	10	JAEOEA000000000
CQ72	Chongqing	O50	H32	10	JAEOEB000000000
CQ73	Chongqing	O9a	H30	361	JAEOEC000000000
CQ74	Chongqing	-	H42	-	JAEOED000000000
CQ75	Chongqing	O9a	H30	361	JAEOEE000000000
CQ77	Chongqing	O107	H47	10	JAEOEF000000000
CQ78	Chongqing	-	H4	101	JAEOEG000000000
CQ79	Chongqing	O81	H27	7111	JAEOEH000000000
CQ8	Chongqing	O8	H11	8622	JAEOEI000000000
CQ80	Chongqing	O9a	H30	361	JAEOEJ000000000
CQ9	Chongqing	O48	H34	5229	JAEOEK000000000
CQ92	Chongqing	O159	H51	8128	JAEOEL000000000
E_coli_RXD10	Henan	O101	H10	617	JAEOEM000000000
E_coli_RXD5	Henan	O101	H10	617	JAEOEN000000000
FJ26	Fujian	O101	H9	10	JAEOEO000000000
FJ38	Fujian	O101	H9	10	JAEOEP000000000
FY119	Henan	-	H20	6778	JAEOEQ000000000
FY183	Henan	-	H4	209	JAEOER000000000
FY187	Henan	O125ab	H32	-	JAEOES000000000
FY197	Henan	-	H9	746	JAEOET000000000
FY207	Henan	O8	H12	10	JAEOEU000000000
FY209	Henan	O88	H33	34	JAEOEV000000000
FY213	Henan	O21	H51	5229	JAEOEW000000000
FY215	Henan	O153	H42	648	JAEOEX000000000
FY216	Henan	-	H51	5229	JAEOEY000000000
FY217	Henan	O33	H26	6910	JAEOEZ000000000
FY219	Henan	-	H4	10	JAEOFA000000000
FY227	Henan	-	H4	10	JAEOFB000000000
FY228	Henan	-	H32	10	JAEOFC000000000
FY229	Henan	O154	H19	156	JAEOFD000000000
FY230	Henan	O8	H7	3580	JAEOFE000000000
FY237	Henan	-	H11	48	JAEOFF000000000
FY239	Henan	O45	H10	877	JAEOFG000000000
FY240	Henan	O169	H14	7167	JAEOFH000000000
FY241	Henan	O130	H45	156	JAEOFI000000000
FY246	Henan	O8	H12	10	JAEOFJ000000000
FY248	Henan	O36	H20	871	JAEOFK000000000
FY249	Henan	O130	H45	4214	JAEOFL000000000
FY251	Henan	O116	H11	29	JAEOFM000000000
FY252	Henan	O84	H45	4214	JAEOFN000000000
FY253	Henan	O8	H11	48	JAEOFO000000000
FY256	Henan	O145	H11	6727	JAEOFP000000000
FY257	Henan	-	H38	101	JAEOFQ000000000
FY261	Henan	-	H38	101	JAEOFR000000000
FY262	Henan	O136	H5	1684	JAEOFS000000000
FY267	Henan	-	H38	101	JAEOFT000000000
FY268	Henan	O8	H11	48	JAEOFU000000000
FY44	Henan	O9a	H4	3014	JAEOFV000000000
FY45	Henan	O8	H18	48	JAEOFW000000000
FY48	Henan	O101	H10	617	JAEOFX000000000
FY66	Henan	O16	H32	1286	JAEOFY000000000
FY74	Henan	O36	H4	746	JAEOFZ000000000
GD40	Guangdong	O11	H18	69	JAEOGA000000000
GS100	Gansu	O128ac	H5	-	JAEOGB000000000
GS105	Gansu	-	H11	48	JAEOGC000000000
GS123	Gansu	O81	H27	10	JAEOGD000000000
GS128	Gansu	O70	H11	48	JAEOGE000000000
GS133	Gansu	O15	H11	542	JAEOGF000000000
GS138	Gansu	O45	H45	641	JAEOGG000000000
GS16	Gansu	O9a	H30	540	JAEOGH000000000
GS191	Gansu	O125ab	H21	359	JAEOGI000000000
GS207	Gansu	-	H31	354	JAEOGJ000000000
GS208	Gansu	O11	H25	457	JAEOGK000000000
GS29	Gansu	O23	H16	453	JAEOGL000000000
GS3	Gansu	O8	H21	101	JAEOGM000000000
GS33	Gansu	O10	H21	101	JAEOGN000000000
GS34	Gansu	O10	H21	101	JAEOGO000000000
GS35	Gansu	O10	H21	101	JAEOGP000000000
GS4	Gansu	O101	H9	10	JAEOGQ000000000
GS47	Gansu	O116	H40	101	JAEOGR000000000
GS58	Gansu	O8	-	155	JAEOGS000000000
GS59	Gansu	O9a	H4	46	JAEOGT000000000
GS6	Gansu	-	H29	8168	JAEOGU000000000
GS61	Gansu	O170	H5	-	JAEOGV000000000
GS62	Gansu	O8	-	155	JAEOGW000000000
GS72	Gansu	O8	-	155	JAEOGX000000000
GS78	Gansu	O8	-	155	JAEOGY000000000
GS8	Gansu	O101	H9	617	JAEOGZ000000000
GS82	Gansu	O25	H19	4385	JAEOHA000000000
GS84	Gansu	-	H11	48	JAEOHB000000000
GS85	Gansu	O5	H11	48	JAEOHC000000000
GS86	Gansu	O101	H10	617	JAEOHD000000000
GS93	Gansu	O101	H10	744	JAEOHE000000000
GS99	Gansu	-	H11	48	JAEOHF000000000
GX18	Guangxi	-	H19	6290	JAEOHG000000000
GX29	Guangxi	O8	H7	3580	JAEOHH000000000
GX37	Guangxi	O5	H4	93	JAEOHI000000000
GX38	Guangxi	O88	H31	101	JAEOHJ000000000
GZ10	Guizhou	O150	H26	1112	JAEOHK000000000
GZ12	Guizhou	O149	H9	410	JAEOHL000000000
GZ16	Guizhou	-	H7	2766	JAEOHM000000000
GZ18	Guizhou	O8	H25	58	JAEOHN000000000
GZ29	Guizhou	O98	H26	5871	JAEOHO000000000
GZ31	Guizhou	O150	H26	1112	JAEOHP000000000
GZ34	Guizhou	O8	H45	542	JAEOHQ000000000
GZ40	Guizhou	O45	H10	-	JAEOHR000000000
GZ43	Guizhou	O161	H32	10	JAEOHS000000000
GZ51	Guizhou	O103	H43	48	JAEOHT000000000
GZ55	Guizhou	-	H38	101	JAEOHU000000000
GZ64	Guizhou	O9a	H4	3014	JAEOHV000000000
GZ86	Guizhou	O136	H40	1081	JAEOHW000000000
GZ89	Guizhou	O140	-	7852	JAEOHX000000000
GZ9	Guizhou	O98	H26	5871	JAEOHY000000000
GZ98	Guizhou	O9a	H25	5878	JAEOHZ000000000
HB11	Hebei	O130	H18	746	JAEOIA000000000
HB13	Hebei	O78	H4	23	JAEOIB000000000
HB17	Hebei	O130	H18	746	JAEOIC000000000
HB22	Hebei	O9a	H4	46	JAEPWK000000000
HB23	Hebei	O8	-	155	JAEOID000000000
HB24	Hebei	O83	H42	648	JAEOIE000000000
HB27	Hebei	O115	H10	641	JAEOIF000000000
HB28	Hebei	O8	H30	58	JAEOIG000000000
HB29	Hebei	O182	H19	10	JAEOIH000000000
HB3	Hebei	O162	H10	101	JAEOII000000000
HB30	Hebei	O9a	H4	46	JAEOIJ000000000
HB33	Hebei	O115	H10	641	JAEOIK000000000
HB36	Hebei	O81	H27	3339	JAEOIL000000000
HB37	Hebei	O182	H19	10	JAEOIM000000000
HB38	Hebei	O45	H45	641	JAEOIN000000000
HB4	Hebei	O9a	H4	46	JAEPWL000000000
HB42	Hebei	O162	H10	101	JAEOIO000000000
HB44	Hebei	O157	H19	4379	JAEOIP000000000
HB45	Hebei	O5	H32	10	JAEOIQ000000000
HB50	Hebei	O13/O135	-	10	JAEOIR000000000
HB53	Hebei	O149	H12	10	JAEOIS000000000
HB55	Hebei	O70	H10	641	JAEOIT000000000
HB6	Hebei	O177	H11	29	JAEOIU000000000
HB61	Hebei	O125ab	H32	-	JAEOIV000000000
HB64	Hebei	O28ac/O42	H20	871	JAEOIW000000000
HB84	Hebei	O65	H40	542	JAEOIX000000000
HLJ34	Heilongjiang	O103	H2	20	JAEOIY000000000
HLJ5	Heilongjiang	O9a	H30	540	JAEOIZ000000000
HLJ64	Heilongjiang	O101	H9	744	JAEOJA000000000
HN15	Hainan	O81	H23	2509	JAEOJB000000000
HUBJ12	Hubei	O143	H4	117	JAEOJC000000000
HUBJ16	Hubei	O101	H4	44	JAEOJD000000000
HUBJ20	Hubei	O101	H4	44	JAEOJE000000000
HUBJ22	Hubei	O9	H4	6354	JAEOJF000000000
HUBJ24	Hubei	O101	H4	44	JAEOJG000000000
HUBJ25	Hubei	O128ac	H12	515	JAEOJH000000000
HUBJ28	Hubei	-	H19	746	JAEOJI000000000
HUBJ30	Hubei	O128ac	H12	515	JAEOJJ000000000
HUBJ8	Hubei	O18ac	H49	212	JAEOJK000000000
HUBS21	Hubei	O28ac/O42	H28	156	JAEOJL000000000
HUBS24	Hubei	O174	H9	910	JAEOJM000000000
HUBS28	Hubei	O101	H9	744	JAEOJN000000000
HUBS36	Hubei	O11	H25	1674	JAEOJO000000000
HUBS37	Hubei	O11	H25	1674	JAEOJP000000000
HUBS5	Hubei	O11	H25	457	JAEOJQ000000000
HUN101	Hunan	O28ac/O42	H25	58	JAEOJR000000000
HUN103	Hunan	O8	H25	58	JAEOJS000000000
HUN105	Hunan	O9a	H4	3014	JAEOJT000000000
HUN107	Hunan	O15	H18	69	JAEOJU000000000
HUN108	Hunan	O36	H51	5229	JAEOJV000000000
HUN109	Hunan	O8	H4	88	JAEOJW000000000
HUN11	Hunan	O108	H9	799	JAEOJX000000000
HUN111	Hunan	O128ac	H12	515	JAEOJY000000000
HUN112	Hunan	O147	H5	1244	JAEOJZ000000000
HUN113	Hunan	O8	H18	48	JAEOKA000000000
HUN115	Hunan	O28ac/O42	H32	1397	JAEOKB000000000
HUN127	Hunan	O154	H21	101	JAEOKC000000000
HUN128	Hunan	-	H30	-	JAEOKD000000000
HUN129	Hunan	-	H51	5229	JAEOKE000000000
HUN13	Hunan	O116	H38	-	JAEOKF000000000
HUN14	Hunan	O28ac/O42	H32	10	JAEOKG000000000
HUN15	Hunan	O148	H30	-	JAEOKH000000000
HUN16	Hunan	O9a	H30	-	JAEOKI000000000
HUN18	Hunan	O7	H23	5171	JAEOKJ000000000
HUN19	Hunan	O83	H42	648	JAEOKK000000000
HUN20	Hunan	O81	H31	101	JAEOKL000000000
HUN23	Hunan	O101	H10	10	JAEOKM000000000
HUN24	Hunan	O128ac	H35	1147	JAEOKN000000000
HUN26	Hunan	O15	H45	101	JAEOKO000000000
HUN27	Hunan	-	H16	2973	JAEOKP000000000
HUN29	Hunan	-	H16	2973	JAEOKQ000000000
HUN38	Hunan	O38	H26	1634	JAEOKR000000000
HUN39	Hunan	O8	-	155	JAEOKS000000000
HUN4	Hunan	-	H20	6778	JAEOKT000000000
HUN45	Hunan	O178	H7	5415	JAEOKU000000000
HUN49	Hunan	-	H32	10	JAEOKV000000000
HUN50	Hunan	O7	H23	5171	JAEOKW000000000
HUN56	Hunan	O178	H7	5415	JAEOKX000000000
HUN58	Hunan	O108	H9	799	JAEOKY000000000
HUN59	Hunan	O108	H9	799	JAEOKZ000000000
HUN7	Hunan	O1	H27	10	JAEOLA000000000
HUN71	Hunan	O36	H51	5229	JAEOLB000000000
HUN72	Hunan	O9a	H9	58	JAEOLC000000000
HUN75	Hunan	-	H30	-	JAEOLD000000000
HUN77	Hunan	O101	H9	744	JAEOLE000000000
HUN78	Hunan	O82	H8	101	JAEOLF000000000
HUN8	Hunan	O8	H11	-	JAEOLG000000000
HUN80	Hunan	O130	H26	1716	JAEOLH000000000
HUN82	Hunan	O9a	H10	34	JAEOLI000000000
HUN83	Hunan	O9a	H4	3014	JAEOLJ000000000
HUN84	Hunan	O60	H5	206	JAEOLK000000000
HUN89	Hunan	O101	H10	617	JAEOLL000000000
HUN9	Hunan	O166	H15	70	JAEOLM000000000
HUN92	Hunan	O130	H45	5229	JAEOLN000000000
HUN94	Hunan	O35	H12	10	JAEOLO000000000
HUNJ27	Hubei	O101	H9	744	JAEOLP000000000
HUNS32	Hubei	O101	H4	215	JAEOLQ000000000
HUNS33	Hubei	O174	H9	910	JAEOLR000000000
HUNS34	Hubei	O76	H51	5229	JAEOLS000000000
HUNS46	Hubei	-	H7	278	JAEOLT000000000
HUNS48	Hubei	-	H19	3856	JAEOLU000000000
JL33	Jilin	O9a	H9	602	JAEOLV000000000
JS77	Jiangsu	O175	H16	603	JAEOLW000000000
JX10	Jiangxi	O101	H10	617	JAEOLX000000000
JX12	Jiangxi	O87	H7	4578	JAEOLY000000000
JX13	Jiangxi	O101	H9	744	JAEOLZ000000000
JX16	Jiangxi	O101	H9	744	JAEOMA000000000
JX18	Jiangxi	-	H18	746	JAEOMB000000000
JX21	Jiangxi	O159	H51	5229	JAEOMC000000000
JX23	Jiangxi	O128ac	H12	515	JAEOMD000000000
JX25	Jiangxi	O1	H8	75	JAEOME000000000
JX26	Jiangxi	O7	H51	101	JAEOMF000000000
JX38	Jiangxi	O10	H21	101	JAEOMG000000000
JX39	Jiangxi	O101	H9	617	JAEOMH000000000
JX4	Jiangxi	-	H11	48	JAEOMI000000000
JX40	Jiangxi	O28ac/O42	H32	877	JAEOMJ000000000
JX42	Jiangxi	-	H11	48	JAEOMK000000000
JX45	Jiangxi	O9	H9	410	JAEOML000000000
LN10	Liaoning	O9a	H4	3014	JAEOMM000000000
LN13	Liaoning	O98	H10	641	JAEOMN000000000
LN32	Liaoning	O9a	H4	3014	JAEOMO000000000
LN35	Liaoning	-	H16	2973	JAEOMP000000000
LN36	Liaoning	O9	H18	345	JAEOMQ000000000
LN42	Liaoning	-	H25	156	JAEOMR000000000
LN43	Liaoning	O153	H34	354	JAEOMS000000000
LN44	Liaoning	-	H4	746	JAEOMT000000000
LN59	Liaoning	O98	H10	641	JAEOMU000000000
LN62	Liaoning	O125ab	H25	101	JAEOMV000000000
LN64	Liaoning	O8	H28	162	JAEOMW000000000
LN69	Liaoning	O88	H31	101	JAEOMX000000000
LN73	Liaoning	O76	H32	2935	JAEOMY000000000
LN74	Liaoning	O11	H32	10	JAEOMZ000000000
LN75	Liaoning	O11	H32	10	JAEONA000000000
NMG10	Inner Mongolia	O83	H42	648	JAEONB000000000
NMG12	Inner Mongolia	-	H45	155	JAEONC000000000
NMG22	Inner Mongolia	O91	H10	-	JAEOND000000000
NMG24	Inner Mongolia	O75	H21	101	JAEONE000000000
NMG25	Inner Mongolia	O23	H16	453	JAEONF000000000
NMG29	Inner Mongolia	O8	H21	1725	JAEONG000000000
NMG3	Inner Mongolia	O136	H40	-	JAEONH000000000
NMG32	Inner Mongolia	-	-	-	JAEONI000000000
NMG39	Inner Mongolia	O10	H5	5945	JAEONJ000000000
NMG42	Inner Mongolia	O101	H10	744	JAEONK000000000
NMG46	Inner Mongolia	O9a	H4	3014	JAEONL000000000
NMG47	Inner Mongolia	O101	H10	617	JAEONM000000000
NMG48	Inner Mongolia	O60	H5	206	JAEONN000000000
NMG49	Inner Mongolia	O101	H10	617	JAEONO000000000
NMG5	Inner Mongolia	O136	H40	-	JAEONP000000000
NMG50	Inner Mongolia	O101	H10	617	JAEONQ000000000
NMG6	Inner Mongolia	O101	H10	744	JAEONR000000000
NMG7	Inner Mongolia	O149	H10	410	JAEONS000000000
NMG8	Inner Mongolia	O136	H40	-	JAEONT000000000
NMG9	Inner Mongolia	O136	H40	-	JAEONU000000000
NX2	Ningxia	O98	H26	1114	JAEONV000000000
NX28	Ningxia	-	H21	189	JAEONW000000000
QH1	Qinghai	-	H51	5229	JAEONX000000000
QH10	Qinghai	O8	H45	542	JAEONY000000000
QH12	Qinghai	O9a	H4	2608	JAEONZ000000000
QH13	Qinghai	O88	H31	4014	JAEOOA000000000
QH17	Qinghai	-	H51	5229	JAEOOB000000000
QH18	Qinghai	O151	H21	101	JAEOOC000000000
QH2	Qinghai	O82	H8	101	JAEOOD000000000
QH3	Qinghai	O23	H16	453	JAEOOE000000000
QH4	Qinghai	O9a	H4	2608	JAEOOF000000000
QH5	Qinghai	O9a	H4	2608	JAEOOG000000000
QH6	Qinghai	O8	H45	542	JAEOOH000000000
QH7	Qinghai	O82	H8	101	JAEOOI000000000
QH8	Qinghai	O8	H45	542	JAEOOJ000000000
QH9	Qinghai	O8	H45	542	JAEOOK000000000
S103	Henan	-	H34	5229	JAEOOL000000000
S104	Henan	O15	H18	69	JAEOOM000000000
S147	Henan	-	H9	-	JAEOON000000000
S158	Henan	O8	H45	542	JAEOOO000000000
S180	Henan	O21	H51	5229	JAEOOP000000000
S181	Henan	-	H20	-	JAEOOQ000000000
S182	Henan	-	H11	48	JAEOOR000000000
S191	Henan	O120	H32	7050	JAEOOS000000000
S192	Henan	O154	H19	156	JAEOOT000000000
S193	Henan	O1	H19	8318	JAEOOU000000000
S194	Henan	O110	H5	206	JAEOOV000000000
S195	Henan	O16	H32	1286	JAEOOW000000000
S196	Henan	O101	H9	744	JAEOOX000000000
S198	Henan	O154	H19	156	JAEOOY000000000
S199	Henan	O184	H11	29	JAEOOZ000000000
S200	Henan	-	H11	48	JAEOPA000000000
S201	Henan	O66	H25	2325	JAEOPB000000000
S203	Henan	O181	H11	48	JAEOPC000000000
S204	Henan	O149	H46	710	JAEOPD000000000
S205	Henan	O115	H51	641	JAEOPE000000000
S206	Henan	O18ab	H32	10	JAEOPF000000000
S208	Henan	O154	H19	156	JAEOPG000000000
S210	Henan	-	H11	48	JAEOPH000000000
S211	Henan	O19	H19	871	JAEOPI000000000
S212	Henan	O90	H51	10	JAEOPJ000000000
S47	Henan	O33	H26	6910	JAEOPK000000000
S49	Henan	O16	H32	1286	JAEOPL000000000
S51	Henan	O1	H19	8318	JAEOPM000000000
S52	Henan	O102	H6	-	JAEOPN000000000
S56	Henan	O170	H5	48	JAEOPO000000000
S57	Henan	O12	H11	48	JAEOPP000000000
S61	Henan	O149	H11	-	JAEOPQ000000000
S67	Henan	O5	H32	10	JAEOPR000000000
S70	Henan	O38	H26	-	JAEOPS000000000
S72	Henan	O1	H19	8318	JAEOPT000000000
S73	Henan	O29	H10	711	JAEOPU000000000
S75	Henan	O101	H10	744	JAEOPV000000000
S77	Henan	O7	H23	5171	JAEOPW000000000
S78	Henan	O1	H19	8318	JAEOPX000000000
S79	Henan	O149	H11	-	JAEOPY000000000
S82	Henan	O60	H5	206	JAEOPZ000000000
S87	Henan	O87	H7	4578	JAEOQA000000000
S88	Henan	O87	H7	4578	JAEOQB000000000
S89	Henan	O23	H16	453	JAEOQC000000000
S91	Henan	O109	H45	542	JAEOQD000000000
S95	Henan	O23	H16	453	JAEOQE000000000
S98	Henan	O87	H7	4578	JAEOQF000000000
S99	Henan	-	H14	1081	JAEOQG000000000
SAX11	Shaanxi	O9	H37	3997	JAEOQH000000000
SAX15	Shaanxi	O154	H19	156	JAEOQI000000000
SAX16	Shaanxi	O101	H9	744	JAEOQJ000000000
SAX2	Shaanxi	O15	H40	1788	JAEOQK000000000
SAX21	Shaanxi	O9a	H30	-	JAEOQL000000000
SAX22	Shaanxi	O101	H9	617	JAEOQM000000000
SAX32	Shaanxi	O175	H16	603	JAEOQN000000000
SAX35	Shaanxi	O167	H34	1266	JAEOQO000000000
SAX4	Shaanxi	O101	H10	744	JAEOQP000000000
SAX40	Shaanxi	O7	H18	3052	JAEOQQ000000000
SAX6	Shaanxi	O60	H5	206	JAEOQR000000000
SC1	Sichuan	O81	H23	2509	JAENBN000000000
SC10	Sichuan	O101	H9	744	JAENBM000000000
SC3	Sichuan	O101	H9	744	JAENBL000000000
SC4	Sichuan	O9a	H9	10	JAENBK000000000
SD1	Shandong	O170	H5	-	JAENBJ000000000
SD10	Shandong	O10	H21	101	JAENBI000000000
SD11	Shandong	O101	H9	617	JAENBH000000000
SD12	Shandong	O76	H32	2935	JAENBG000000000
SD15	Shandong	O18ac	H45	224	JAENBF000000000
SD16	Shandong	O70	H10	641	JAENBE000000000
SD2	Shandong	O76	H51	5229	JAENBD000000000
SD21	Shandong	O153	H25	1684	JAENBC000000000
SD23	Shandong	-	H11	48	JAENBB000000000
SD26	Shandong	-	H11	48	JAENBA000000000
SD28	Shandong	O64	H19	-	JAENAZ000000000
SD30	Shandong	O33	H21	101	JAENAY000000000
SD35	Shandong	O33	H21	101	JAENAX000000000
SD36	Shandong	O33	H21	101	JAENAW000000000
SD37	Shandong	O29	H31	101	JAENAV000000000
SD38	Shandong	O33	H21	101	JAENAU000000000
SD40	Shandong	O81	H27	3339	JAENAT000000000
SD5	Shandong	-	H12	-	JAENHE000000000
SD58	Shandong	O73	H19	846	JAENAS000000000
SD7	Shandong	-	H45	6831	JAENAR000000000
SH22	Shanghai	O136	H5	1684	JAENAQ000000000
SH30	Shanghai	O88	H31	101	JAENAP000000000
SH36	Shanghai	O9a	H25	58	JAENAO000000000
SH40	Shanghai	O155	H45	542	JAENAN000000000
SH41	Shanghai	-	H32	10	JAENAM000000000
SH43	Shanghai	O9a	H25	58	JAENAL000000000
SH44	Shanghai	O155	H45	542	JAENAK000000000
SH46	Shanghai	O26	H32	10	JAENAJ000000000
SH47	Shanghai	O128ac	H49	7197	JAENAI000000000
SH48	Shanghai	O160	H30	-	JAENAH000000000
SH50	Shanghai	O26	H32	10	JAENAG000000000
SH51	Shanghai	O54	H5	2913	JAENAF000000000
SH52	Shanghai	O11	H25	457	JAENAE000000000
SH53	Shanghai	O128ac	H49	7197	JAENAD000000000
SH55	Shanghai	O128ac	H49	7197	JAENAC000000000
SH56	Shanghai	O11	H25	457	JAENAB000000000
SH57	Shanghai	O128ac	H49	7197	JAENAA000000000
SH59	Shanghai	O128ac	H49	7197	JAEMZZ000000000
SH60	Shanghai	O160	H30	-	JAEMZY000000000
SH63	Shanghai	O45	H10	641	JAEMZX000000000
SH68	Shanghai	O88	H31	4014	JAEMZW000000000
SH7	Shanghai	O9a	H25	58	JAEMZV000000000
SH71	Shanghai	O155	H32	-	JAEMZU000000000
SH77	Shanghai	O88	H31	4014	JAEMZT000000000
SH79	Shanghai	O88	H31	4014	JAEMZS000000000
SH90	Shanghai	-	H48	1121	JAEMZR000000000
SHB15	Hubei	-	H30	361	JAEMZQ000000000
SHB6	Hubei	O100	H32	10	JAEMZP000000000
SX52	Shanxi	O70	H10	641	JAEMZO000000000
SX54	Shanxi	-	H10	1684	JAEMZN000000000
TJ	Tianjin	O101	H4	10	JAEMZM000000000
TJ1	Tianjin	O23	H45	772	JAEMZL000000000
TJ10	Tianjin	O23	H45	772	JAEMZK000000000
TJ12	Tianjin	O23	H45	772	JAEMZJ000000000
TJ15	Tianjin	O23	H45	772	JAEMZI000000000
TJ17	Tianjin	O23	H45	772	JAEMZH000000000
TJ3	Tianjin	O23	H45	772	JAEMZG000000000
TJ5	Tianjin	O23	H45	772	JAEMZF000000000
TJ50	Tianjin	O163	H7	1148	JAEMZE000000000
TJ8	Tianjin	O23	H45	772	JAEMZD000000000
XD1	Henan	O7	H23	5171	JAEMZC000000000
XD100	Henan	O99	H38	695	JAENHD000000000
XD101	Henan	O17/O77	H18	-	JAEMZB000000000
XD11	Henan	-	H37	746	JAENDQ000000000
XD115	Henan	O120	H32	7050	JAENHC000000000
XD116	Henan	-	H20	6778	JAEMZA000000000
XD12	Henan	O101	H9	617	JAENDP000000000
XD171	Henan	O8	H45	542	JAEMYZ000000000
XD2	Henan	O66	H45	101	JAEMYY000000000
XD20	Henan	O101	H9	617	JAENDO000000000
XD23	Henan	O154	H16	165	JAEMYX000000000
XD24	Henan	O101	H9	617	JAENDN000000000
XD25	Henan	O8	H21	359	JAEMYW000000000
XD26	Henan	O8	H21	359	JAEMYV000000000
XD3	Henan	O101	H10	617	JAEMYU000000000
XD33	Henan	-	H37	746	JAENDM000000000
XD34	Henan	O36	H51	5229	JAEMYT000000000
XD35	Henan	-	H37	746	JAENHG000000000
XD36	Henan	O101	H37	746	JAENHB000000000
XD37	Henan	-	H25	744	JAEMYS000000000
XD38	Henan	-	H14	2526	JAENHA000000000
XD39	Henan	O36	H51	5229	JAEMYR000000000
XD40	Henan	O36	H51	5229	JAEMYQ000000000
XD86	Henan	O87	H7	4578	JAEMYP000000000
XD97	Henan	-	H34	5229	JAENDL000000000
XJ12	Xinjiang	O8	H30	58	JAEMYO000000000
XJ13	Xinjiang	O8	H30	58	JAEMYN000000000
XJ15	Xinjiang	O69	H32	10	JAEMYM000000000
XJ17	Xinjiang	-	H11	88	JAEMYL000000000
XJ26	Xinjiang	O100	H12	205	JAEMYK000000000
XJ32	Xinjiang	O101	H10	617	JAEMYJ000000000
XJ33	Xinjiang	O100	H12	205	JAEMYI000000000
XJ35	Xinjiang	O25	H19	4385	JAEMYH000000000
XJ36	Xinjiang	O100	H12	205	JAEMYG000000000
XJ39	Xinjiang	O163	H7	1148	JAEMYF000000000
XJ4	Xinjiang	O8	H30	58	JAEMYE000000000
XJ40	Xinjiang	O83	H42	648	JAEMYD000000000
XJ48	Xinjiang	O23	H16	-	JAEMYC000000000
XJ49	Xinjiang	O9a	H4	-	JAEMYB000000000
XJ5	Xinjiang	O80	H12	4121	JAEMYA000000000
XJ50	Xinjiang	O163	H7	1148	JAEMXZ000000000
XJ9	Xinjiang	O8	H30	58	JAEMXY000000000
YN13	Yunan	O159	H4	10	JAEMXX000000000
YN17	Yunan	O103	H2	20	JAEMXW000000000
YN19	Yunan	O103	H2	20	JAEMXV000000000
YN20	Yunan	O103	H2	20	JAEMXU000000000
YN22	Yunan	O103	H2	20	JAEMXT000000000
YN33	Yunan	O151	H21	101	JAEMXS000000000
YN34	Yunan	O102	H6	5950	JAEMXR000000000
YN39	Yunan	O102	H6	5950	JAEMXQ000000000
ZJ1	Zhejiang	O13/O135	H19	-	JAEMXP000000000
ZJ20	Zhejiang	O1	H26	-	JAEMXO000000000
ZJ29	Zhejiang	O8	H45	4214	JAEMXN000000000
