# Supplementary material for: Antimicrobial resistance and population genomics of extensively drug resistant Escherichia coli in pig farms in mainland China: a national wide epidemiological and microbiological study
Source: Research Square preprint supplement (doi:10.21203/rs.3.rs-502741/v1), 2021-05-14
Supplement: Supplementary file 7 [file 98e3dee19479d51743d5a957.xlsx]

## Sheet: Sheet1
Classes	Aminoglycosides			Carbapenems			Cephalosporins						Aonobactams	β-lactam combination agents			Fluoroquinolones				Tetracyclines			Nitrofurantoin	Fosfomycin	Polymyxins	Phenicol	Sulfonamides
Antibiotics	Amikacin	Gentamicin	Tobramycin	Ertapenem	Imipenem	Mropenem	Cefazolin	Cefuroxime	Cefoxitin	Ceftazidime	Ceftriaxone	Cefepime	Aztreonam	Amoxicillin/clavulanate	Ampicillin/sulbactam	Piperacillin/tazobactam	Ciprofloxacin	Levofloxacin	Moxifloxacin	Norfloxacin	Minocycline	Tetracycline	Tigecycline	Nitrofurantoin	Fosfomycin	Colistin	Chloramphenicol	Trimethoprim/sulfamethoxazole
XD1c	≤8	>8	>8	≤0.25	0.5	≤0.13	>16	>16	≤4	≤1	>32	2	≤2	≤8/4	8/4	≤4/4	≤0.5	≤1	1	≤2	4	>8	≤1	≤16	>128	4	>16	>4/76
XD7c	≤8	≤2	≤2	≤0.25	0.5	≤0.13	4	16	8	≤1	≤1	≤1	≤2	≤8/4	8/4	≤4/4	≤0.5	≤1	≤0.5	≤2	≤1	≤2	≤1	≤16	≤16	4	≤4	≤1/19
XD20c	≤8	≤2	≤2	≤0.25	0.5	≤0.13	4	16	8	≤1	≤1	≤1	≤2	≤8/4	8/4	≤4/4	≤0.5	≤1	≤0.5	≤2	≤1	≤2	≤1	≤16	≤16	4	≤4	≤1/19
XD24c	≤8	≤2	≤2	≤0.25	0.5	≤0.13	4	16	8	≤1	≤1	≤1	≤2	≤8/4	8/4	≤4/4	≤0.5	≤1	≤0.5	≤2	≤1	≤2	≤1	≤16	≤16	4	≤4	≤1/19
XD33c	≤8	≤2	≤2	≤0.25	0.5	≤0.13	4	8	8	≤1	≤1	≤1	≤2	≤8/4	8/4	≤4/4	≤0.5	≤1	≤0.5	≤2	2	≤2	≤1	≤16	≤16	4	≤4	≤1/19
XD35c	≤8	≤2	≤2	≤0.25	0.5	≤0.13	4	8	8	≤1	≤1	≤1	≤2	≤8/4	8/4	≤4/4	≤0.5	≤1	≤0.5	≤2	2	≤2	≤1	≤16	≤16	4	≤4	≤1/19
115c	≤8	≤2	≤2	≤0.25	0.5	≤0.13	4	16	8	≤1	≤1	≤1	≤2	≤8/4	8/4	≤4/4	≤0.5	≤1	≤0.5	≤2	2	≤2	≤1	≤16	≤16	4	≤4	≤1/19
191c	>32	>8	>8	≤0.25	≤0.25	≤0.13	8	16	>16	≤1	≤1	≤1	≤2	32/16	16/8	≤4/4	1	2	>2	4	16	>8	≤1	>64	≤16	4	>16	>4/76
192c	>32	>8	>8	≤0.25	≤0.25	≤0.13	16	>16	>16	2	≤1	≤1	≤2	32/16	>16/8	≤4/4	>4	>8	>2	>8	8	>8	2	64	≤16	4	>16	>4/76
194c	>32	>8	>8	>2	≤0.25	1	>16	>16	8	≤1	>32	2	≤2	16/8	>16/8	≤4/4	4	2	>2	>8	4	>8	≤1	>64	≤16	4	>16	>4/76
195c	≤8	>8	>8	≤0.25	0.5	≤0.13	>16	>16	8	4	>32	4	>32	16/8	>16/8	≤4/4	≤0.5	≤1	≤0.5	≤2	8	>8	≤1	32	≤16	4	>16	≤1/19
198c	>32	>8	>8	≤0.25	≤0.25	≤0.13	8	>16	>16	≤1	≤1	≤1	≤2	32/16	>16/8	≤4/4	>4	>8	>2	>8	8	>8	2	64	≤16	4	>16	>4/76
199c	>32	>8	>8	≤0.25	0.5	≤0.13	>16	>16	8	32	>32	8	>32	16/8	>16/8	≤4/4	≤0.5	≤1	≤0.5	≤2	≤1	≤2	≤1	≤16	≤16	4	≤4	≤1/19
206c	≤8	>8	>8	≤0.25	0.5	≤0.13	8	8	8	≤1	≤1	≤1	≤2	>32/16	>16/8	16/4	≤0.5	≤1	≤0.5	≤2	8	>8	≤1	32	≤16	4	>16	≤1/19
208c	>32	>8	>8	≤0.25	≤0.25	≤0.13	4	16	16	2	≤1	≤1	≤2	16/8	16/8	≤4/4	>4	>8	>2	>8	16	>8	2	32	≤16	4	>16	>4/76
219c	≤8	>8	8	≤0.25	0.5	≤0.13	4	8	8	≤1	≤1	≤1	≤2	16/8	>16/8	≤4/4	≤0.5	≤1	≤0.5	≤2	8	≤2	≤1	≤16	≤16	4	>16	>4/76
227c	≤8	>8	8	≤0.25	0.5	≤0.13	4	8	8	≤1	≤1	≤1	≤2	16/8	16/8	≤4/4	≤0.5	≤1	≤0.5	≤2	8	≤2	≤1	≤16	≤16	4	>16	>4/76
228c	≤8	≤2	≤2	≤0.25	0.5	≤0.13	4	8	8	≤1	≤1	≤1	≤2	≤8/4	8/4	≤4/4	≤0.5	≤1	≤0.5	≤2	2	≤2	≤1	≤16	≤16	4	≤4	≤1/19
241c	>32	>8	>8	≤0.25	≤0.25	≤0.13	>16	>16	>16	>32	>32	>16	>32	32/16	>16/8	64/4	>4	>8	>2	>8	>16	>8	≤1	≤16	≤16	4	>16	>4/76
249c	≤8	≤2	≤2	≤0.25	0.5	≤0.13	≤2	8	8	≤1	≤1	≤1	≤2	≤8/4	≤4/2	≤4/4	≤0.5	≤1	≤0.5	≤2	2	≤2	≤1	≤16	≤16	4	≤4	≤1/19
252c	≤8	≤2	≤2	≤0.25	0.5	≤0.13	4	8	8	≤1	≤1	≤1	≤2	≤8/4	≤4/2	≤4/4	≤0.5	≤1	≤0.5	≤2	2	≤2	≤1	≤16	≤16	4	≤4	≤1/19
253c	≤8	>8	>8	≤0.25	0.5	≤0.13	>16	>16	8	≤1	32	4	4	16/8	16/8	≤4/4	≤0.5	≤1	≤0.5	≤2	2	≤2	≤1	≤16	>128	4	>16	>4/76
257c	>32	>8	>8	≤0.25	≤0.25	≤0.13	>16	>16	8	16	>32	>16	32	16/8	>16/8	≤4/4	>4	>8	>2	>8	8	>8	≤1	≤16	>128	4	>16	≤1/19
261c	>32	>8	>8	≤0.25	≤0.25	≤0.13	>16	>16	8	8	>32	8	32	16/8	>16/8	≤4/4	>4	>8	>2	>8	>16	>8	≤1	≤16	>128	4	>16	≤1/19
268c	>32	>8	>8	≤0.25	0.5	≤0.13	>16	>16	8	32	>32	16	>32	>32/16	>16/8	16/4	≤0.5	≤1	≤0.5	≤2	4	>8	≤1	≤16	>128	4	>16	>4/76
XD98c	≤8	≤2	≤2	≤0.25	1	≤0.13	4	8	8	≤1	≤1	≤1	≤2	≤8/4	8/4	≤4/4	≤0.5	≤1	≤0.5	≤2	≤1	≤2	≤1	≤16	≤16	4	≤4	≤1/19
b15c	≤8	>8	>8	≤0.25	0.5	≤0.13	>16	>16	8	32	>32	>16	>32	16/8	>16/8	≤4/4	≤0.5	≤1	≤0.5	≤2	≤1	≤2	≤1	≤16	>128	4	>16	>4/76
EC600	≤8	≤2	≤2	≤0.25	0.5	≤0.13	4	16	8	≤1	≤1	≤1	≤2	≤8/4	8/4	≤4/4	≤0.5	≤1	≤0.5	≤2	≤1	≤2	≤1	≤16	≤16	≤1	≤4	≤1/19
ATCC25922	≤8	≤2	≤2	≤0.25	≤0.25	≤0.13	≤2	≤4	≤4	≤1	≤1	≤1	≤2	≤8/4	≤4/2	≤4/4	≤0.5	≤1	≤0.5	≤2	≤1	≤2	≤1	≤16	≤16	≤1	≤4	≤1/19
