# Supplementary material for: Antimicrobial resistance and population genomics of extensively drug resistant Escherichia coli in pig farms in mainland China: a national wide epidemiological and microbiological study
Source: Research Square preprint supplement (doi:10.21203/rs.3.rs-502741/v1), 2021-05-14
Supplement: Supplementary file 8 [file 755df16d201bd623e1ece965.xlsx]

## Sheet: Sheet1
Strain	gyrA	gyrB	parC	parE	pmrA	pmrB	folP	23S	16S_rrsB	16S_rrsC	16S_rrsH	ampC	rpoB
AH1	S83L & D87N	None	S80I & E62K	S458A	None	D283G & Y358N	None	542_543insA & 544C>A & 545T>G & 546T>C & 548G>A & 549G>T & 550_551insT & 1171G>A & 1173delT & 1175A>G & 1178C>T & 1723G>A & 2794C>T & 2796T>C & 2799A>G & 2802G>A	79G>A & 80A>C & 89T>G & 90C>T & 93T>C	226A>G	79G>A & 80A>C & 89T>G & 90C>T & 93T>C & 1120T>C	None	None
AH10	S83L & D87N	None	A56T & S80I & E62K & A620V	None	None	None	None	1211C>T & 2794C>T & 2796T>C & 2799A>G & 2802G>A	76G>A & 80A>C & 89T>G & 250A>T & 253A>T & 273T>A	76G>A & 79A>G & 90T>C & 93C>T & 226A>G & 250A>T & 253A>T & 273T>A	76G>A & 80A>C & 89T>G & 250A>T & 253A>T & 273T>A & 1002A>G & 1006C>G & 1010C>T & 1018_1019insA & 1021T>A & 1023delG & 1038T>C & 1120T>C	None	None
AH11	None	H652R	E62K	G197A	G144S	D283G & Y358N	None	137T>A & 142A>T & 1723G>A & 1725T>C & 1726C>G & 1727C>A & 1730C>T & 1733G>T & 1734G>C & 1735A>G & 2203T>G & 2636C>T & 2794C>T & 2796T>C & 2799A>G & 2802G>A	76G>A & 80A>C & 89T>G	76G>A & 79A>G & 90T>C & 93C>T & 226A>G	76G>A & 80A>C & 89T>G & 1002A>G & 1006C>G & 1010C>T & 1018_1019insA & 1021T>A & 1023delG & 1038T>C & 1120T>C	None	None
AH12	S83L & D87N	None	S80I & E62K	S458A	G144S	D283G & Y358N	None	137T>A & 142A>T & 541A>C & 541_542insT & 543G>T & 546_547insT & 547_548insT & 550C>G & 552T>G & 1723G>A	80A>C & 89T>G & 93T>C & 1002G>A & 1006G>C & 1010T>C & 1019delA & 1022A>T & 1023_1024insG & 1038C>T	79A>G & 90T>C & 226A>G & 1002G>A & 1006G>C & 1010T>C & 1019delA & 1022A>T & 1023_1024insG & 1038C>T	80A>C & 89T>G & 93T>C & 1120T>C	None	None
AH13	P872S	None	E62K	None	None	D283G & Y358N	None	137T>A & 142A>T & 1506T>C & 1507C>T & 1723G>A & 2794C>T & 2796T>C & 2799A>G & 2802G>A	250A>T & 253A>T & 273T>A	79A>G & 80C>A & 89G>T & 90T>C & 93C>T & 226A>G & 250A>T & 253A>T & 273T>A	250A>T & 253A>T & 273T>A & 1002A>G & 1006C>G & 1010C>T & 1018_1019insA & 1021T>A & 1023delG & 1038T>C & 1120T>C	None	None
AH15	S83L & D678E & D860N	None	E62K	None	None	H2R & V351I	None	137T>A & 142A>T & 264C>G & 356G>A & 540_541insC & 541A>T & 543G>T & 544C>T & 548G>T & 550C>G & 552delT & 1174T>G & 1211C>T & 1506T>C & 1507C>T & 1723G>A & 1865T>C	1002G>A & 1006G>C & 1007T>C & 1008T>C & 1010T>G & 1011C>T & 1018G>A & 1019A>C & 1021A>G & 1022A>G & 1023T>G & 1036A>G & 1038C>T	79A>G & 80C>A & 89G>T & 90T>C & 93C>T & 226A>G & 1002G>A & 1006G>C & 1007T>C & 1008T>C & 1010T>G & 1011C>T & 1018G>A & 1019A>C & 1021A>G & 1022A>G & 1023T>G & 1036A>G & 1038C>T	1007T>C & 1008T>C & 1010C>G & 1011C>T & 1018G>A & 1019G>C & 1020A>G & 1021T>G & 1022T>G & 1036A>G & 1120T>C	L14_Y15delinsL & G16E & N17T & Q18R & T19P & L20Y & C21V & S22Q & K23N & R24D & R25A & S26L & A27R & P28L & Y29I	None
AH16	S83L & D87N	None	A56T & S80I & E62K & A620V	None	None	None	None	1211C>T & 2794C>T & 2796T>C & 2799A>G & 2802G>A	76G>A & 80A>C & 89T>G & 183C>T & 250A>T & 253A>T & 273T>A	76G>A & 79A>G & 90T>C & 93C>T & 183C>T & 226A>G & 250A>T & 253A>T & 273T>A	76G>A & 80A>C & 89T>G & 183C>T & 250A>T & 253A>T & 273T>A & 1002A>G & 1006C>G & 1010C>T & 1018_1019insA & 1021T>A & 1023delG & 1038T>C & 1120T>C	None	None
AH19	S83L	None	S80I & E62K	None	None	None	None	1232G>A & 1723G>A & 1868_1869insC & 1872_1873insG	80A>C & 89T>G & 90C>T & 93T>C	79A>G & 226A>G	80A>C & 89T>G & 90C>T & 93T>C & 1002A>G & 1006C>G & 1010C>T & 1018_1019insA & 1021T>A & 1023delG & 1038T>C & 1120T>C	None	None
AH20	None	H652R	E62K	G197A	G144S	D283G & Y358N	None	137T>A & 142A>T & 1723G>A & 1725T>C & 1726C>G & 1727C>A & 1730C>T & 1733G>T & 1734G>C & 1735A>G & 2203T>G & 2636C>T & 2794C>T & 2796T>C & 2799A>G & 2802G>A	76G>A & 80A>C & 89T>G	76G>A & 79A>G & 90T>C & 93C>T & 226A>G	76G>A & 80A>C & 89T>G & 1002A>G & 1006C>G & 1010C>T & 1018_1019insA & 1021T>A & 1023delG & 1038T>C & 1120T>C	None	None
AH22	None	H652R	E62K	G197A	G144S	D283G & Y358N	None	137T>A & 142A>T & 1723G>A & 1725T>C & 1726C>G & 1727C>A & 1730C>T & 1733G>T & 1734G>C & 1735A>G & 2203T>G & 2636C>T & 2794C>T & 2796T>C & 2799A>G & 2802G>A	76G>A & 80A>C & 89T>G	76G>A & 79A>G & 90T>C & 93C>T & 226A>G	76G>A & 80A>C & 89T>G & 1002A>G & 1006C>G & 1010C>T & 1018_1019insA & 1021T>A & 1023delG & 1038T>C & 1120T>C	None	None
AH24	None	None	E62K	None	None	Y358N	G231V	137T>A & 142A>T & 356G>A & 542_543insA & 544C>A & 545T>G & 546T>C & 548G>A & 549G>T & 550_551insT & 1171G>A & 1174T>G & 1175delA & 1178C>T & 1723G>A & 1865T>C & 2163A>G & 2794C>T & 2796T>C & 2799A>G & 2802G>A	79G>A & 80A>C & 89T>G & 90C>T & 93T>C & 474G>A & 1002G>A & 1006G>C & 1010T>C & 1019delA & 1022A>T & 1023_1024insG & 1038C>T	226A>G & 474G>A & 1002G>A & 1006G>C & 1010T>C & 1019delA & 1022A>T & 1023_1024insG & 1038C>T	79G>A & 80A>C & 89T>G & 90C>T & 93T>C & 474G>A & 1120T>C	None	None
AH27	S83L & D87N	None	A56T & S80I & E62K & A620V	None	None	None	None	1211C>T & 2794C>T & 2796T>C & 2799A>G & 2802G>A	76G>A & 80A>C & 89T>G & 183C>T & 250A>T & 253A>T & 273T>A	76G>A & 79A>G & 90T>C & 93C>T & 183C>T & 226A>G & 250A>T & 253A>T & 273T>A	76G>A & 80A>C & 89T>G & 183C>T & 250A>T & 253A>T & 273T>A & 1002A>G & 1006C>G & 1010C>T & 1018_1019insA & 1021T>A & 1023delG & 1038T>C & 1120T>C	None	None
AH28	S83L & D87N & V509I	None	S80I & E62K	None	None	P220S & D283G & Y358N	None	137T>A & 142A>T & 356G>A & 542_543insA & 544C>A & 545T>G & 546T>C & 548G>A & 549G>T & 550_551insT & 1723G>A & 1865T>C & 2794C>T & 2796T>C & 2799A>G & 2802G>A	None	79A>G & 80C>A & 89G>T & 90T>C & 93C>T & 226A>G	1002A>G & 1006C>G & 1010C>T & 1018_1019insA & 1021T>A & 1023delG & 1038T>C & 1120T>C	None	None
AH29	D678E	None	E62K	None	None	None	None	83A>G & 137T>A & 142A>T & 1174T>G & 1211C>T & 1529G>A & 1723G>A & 1730C>T & 1865T>C & 2132T>A & 2794C>T & 2796T>C & 2799A>G & 2802G>A	79G>A & 80A>C & 89T>G & 90C>T & 93T>C	226A>G	79G>A & 80A>C & 89T>G & 90C>T & 93T>C & 1120T>C	None	None
AH36	S83L & D87N	None	S80I & E62K	S458A	G144S	D283G & Y358N	None	137T>A & 142A>T & 1211C>T & 1723G>A & 2794C>T & 2796T>C & 2799A>G & 2802G>A	80A>C & 89T>G & 93T>C & 1002G>A & 1006G>C & 1010T>C & 1019delA & 1022A>T & 1023_1024insG & 1038C>T	79A>G & 90T>C & 226A>G & 1002G>A & 1006G>C & 1010T>C & 1019delA & 1022A>T & 1023_1024insG & 1038C>T	80A>C & 89T>G & 93T>C & 1120T>C	None	None
AH37	S83L & D87N	None	A56T & S80I & E62K & A620V	None	None	None	None	1211C>T & 2794C>T & 2796T>C & 2799A>G & 2802G>A	76G>A & 80A>C & 89T>G & 183C>T & 250A>T & 253A>T & 273T>A	76G>A & 79A>G & 90T>C & 93C>T & 183C>T & 226A>G & 250A>T & 253A>T & 273T>A	76G>A & 80A>C & 89T>G & 183C>T & 250A>T & 253A>T & 273T>A & 1002A>G & 1006C>G & 1010C>T & 1018_1019insA & 1021T>A & 1023delG & 1038T>C & 1120T>C	None	None
AH4	S83L & D87N	None	A56T & S80I & E62K & A620V	None	None	None	None	1211C>T & 2794C>T & 2796T>C & 2799A>G & 2802G>A	80A>C & 89T>G & 250A>T & 253A>T & 273T>A	79A>G & 90T>C & 93C>T & 226A>G & 250A>T & 253A>T & 273T>A	80A>C & 89T>G & 250A>T & 253A>T & 273T>A & 1002A>G & 1006C>G & 1010C>T & 1018_1019insA & 1021T>A & 1023delG & 1038T>C & 1120T>C	None	None
AH40	S83L & D87N	None	A56T & S80I & E62K & A620V	None	None	None	None	1211C>T & 2794C>T & 2796T>C & 2799A>G & 2802G>A	76G>A & 80A>C & 89T>G & 250A>T & 253A>T & 273T>A	76G>A & 79A>G & 90T>C & 93C>T & 226A>G & 250A>T & 253A>T & 273T>A	76G>A & 80A>C & 89T>G & 250A>T & 253A>T & 273T>A & 1002A>G & 1006C>G & 1010C>T & 1018_1019insA & 1021T>A & 1023delG & 1038T>C & 1120T>C	None	None
AH41	None	None	E62K	None	None	Y358N	G231V	137T>A & 142A>T & 356G>A & 542_543insA & 544C>A & 545T>G & 546T>C & 548G>A & 549G>T & 550_551insT & 1171G>A & 1174T>G & 1175delA & 1178C>T & 1723G>A & 1865T>C & 2163A>G & 2794C>T & 2796T>C & 2799A>G & 2802G>A	474G>A & 1002G>A & 1006G>C & 1010T>C & 1019delA & 1022A>T & 1023_1024insG & 1038C>T	79A>G & 80C>A & 89G>T & 90T>C & 93C>T & 226A>G & 474G>A & 1002G>A & 1006G>C & 1010T>C & 1019delA & 1022A>T & 1023_1024insG & 1038C>T	474G>A & 1120T>C	None	None
AH47	None	None	E62K	None	None	D283G & Y358N	None	137T>A & 142A>T & 188G>A & 316C>T & 356G>A & 1723G>A & 2794C>T & 2796T>C & 2799A>G & 2802G>A	79G>A & 80A>C & 89T>G & 90C>T & 93T>C	226A>G	79G>A & 80A>C & 89T>G & 90C>T & 93T>C & 1120T>C	None	None
AH48	None	None	E62K & L440R	None	None	D283G & Y358N	None	137T>A & 142A>T & 542_543insA & 544C>A & 545T>G & 546T>C & 548G>A & 549G>T & 550_551insT & 1723G>A & 1725T>C & 1726C>G & 1727C>A & 1730C>T & 1733G>T & 1734G>C & 1735A>G & 1865T>C	None	79A>G & 80C>A & 89G>T & 90T>C & 93C>T & 226A>G	1002A>G & 1006C>G & 1010C>T & 1018_1019insA & 1021T>A & 1023delG & 1038T>C & 1120T>C	None	None
AH8	S83L & D87N	None	A56T & S80I & E62K & A620V	None	None	None	None	1211C>T & 2794C>T & 2796T>C & 2799A>G & 2802G>A	76G>A & 80A>C & 89T>G & 250A>T & 253A>T & 273T>A	76G>A & 79A>G & 90T>C & 93C>T & 226A>G & 250A>T & 253A>T & 273T>A	76G>A & 80A>C & 89T>G & 250A>T & 253A>T & 273T>A & 1002A>G & 1006C>G & 1010C>T & 1018_1019insA & 1021T>A & 1023delG & 1038T>C & 1120T>C	None	None
AH84	None	None	E62K	None	None	D283G & Y358N	None	137T>A & 142A>T & 356G>A & 542_543insA & 544C>A & 545T>G & 546T>C & 548G>A & 549G>T & 550_551insT & 1723G>A & 2794C>T & 2796T>C & 2799A>G & 2802G>A	None	79A>G & 80C>A & 89G>T & 90T>C & 93C>T & 226A>G	1002A>G & 1006C>G & 1010C>T & 1018_1019insA & 1021T>A & 1023delG & 1038T>C & 1120T>C	None	None
AH88	None	None	E62K	None	None	D283G & Y358N	None	137T>A & 142A>T & 542_543insA & 544C>A & 545T>G & 546T>C & 548G>A & 549G>T & 550_551insT & 1722G>A & 2793C>T & 2795T>C & 2798A>G & 2801G>A	250A>T & 253A>T & 273T>A	79A>G & 80C>A & 89G>T & 90T>C & 93C>T & 226A>G & 250A>T & 253A>T & 273T>A	250A>T & 253A>T & 273T>A & 1120T>C	None	None
AH9	S83L	None	E62K	None	None	None	None	854C>T & 1366G>A & 1511_1512insC & 1515_1516insG & 1775T>A & 2437C>T & 2439T>C & 2442A>G & 2445G>A	None	79A>G & 80C>A & 89G>T & 90T>C & 93C>T & 226A>G	1002A>G & 1006C>G & 1010C>T & 1018_1019insA & 1021T>A & 1023delG & 1038T>C & 1120T>C	None	None
AH90	None	None	E62K	None	None	D283G & Y358N	None	137T>A & 142A>T & 1506T>C & 1507C>T & 1723G>A & 2794C>T & 2796T>C & 2799A>G & 2802G>A	79G>A & 80A>C & 89T>G & 90C>T & 93T>C	226A>G	79G>A & 80A>C & 89T>G & 90C>T & 93T>C & 1120T>C	None	None
AH91	None	None	E62K	None	None	D283G & Y358N	None	542_543insA & 544C>A & 545T>G & 546T>C & 548G>A & 549G>T & 550_551insT & 1723G>A & 2163A>G & 2794C>T & 2796T>C & 2799A>G & 2802G>A	250A>T & 253A>T & 273T>A & 1002G>A & 1006G>C & 1010T>C & 1019delA & 1022A>T & 1023_1024insG & 1038C>T	79A>G & 80C>A & 89G>T & 90T>C & 93C>T & 226A>G & 250A>T & 253A>T & 273T>A & 1002G>A & 1006G>C & 1010T>C & 1019delA & 1022A>T & 1023_1024insG & 1038C>T	250A>T & 253A>T & 273T>A & 1120T>C	None	None
AH96	S83L & D87N & D678E	None	S80I & E62K	S458A	None	None	F4Y	285G>A & 1723G>A & 1725T>C & 1726C>G & 1727C>A & 1730C>T & 1733G>T & 1734G>C & 1735A>G	79G>A & 80A>C & 89T>G & 90C>T & 93T>C	226A>G	79G>A & 80A>C & 89T>G & 90C>T & 93T>C & 1120T>C	None	None
BJ21	None	None	E62K	None	None	H2R	None	137T>A & 142A>T & 264C>G & 1211C>T & 1723G>A & 1730C>T & 1865T>C	79G>A & 80A>C & 89T>G & 90C>T & 93T>C	226A>G	79G>A & 80A>C & 89T>G & 90C>T & 93T>C & 1002A>G & 1006C>G & 1010C>T & 1018_1019insA & 1021T>A & 1023delG & 1038T>C & 1120T>C	None	None
BJ25	S83L & D87E & D678E	S492N	S80I & E62K	None	None	H2R & D283G & A360V	None	264C>G & 356G>A & 540_541insC & 541A>T & 543G>T & 544C>T & 548G>T & 550C>G & 552delT & 1723G>A & 1725T>C & 1726C>G & 1727C>A & 1730C>T & 1733G>T & 1734G>C & 1735A>G & 1869_1870insG & 1870C>T & 1872_1873insC & 2205A>G & 2209G>C & 2211A>G & 2215C>G & 2793C>G & 2794C>A & 2802G>T & 2803G>C	79G>T & 80A>C & 89T>G & 90C>A & 183C>T & 474G>A & 1002G>A & 1006G>C & 1007T>C & 1010T>G & 1011C>T & 1018G>A & 1019A>C & 1022A>G & 1023T>G & 1038C>T	79A>T & 90T>A & 93C>T & 183C>T & 226A>G & 474G>A & 1002G>A & 1006G>C & 1007T>C & 1010T>G & 1011C>T & 1018G>A & 1019A>C & 1022A>G & 1023T>G & 1038C>T	79G>T & 80A>C & 89T>G & 90C>A & 183C>T & 474G>A & 1007T>C & 1010C>G & 1011C>T & 1017_1018insA & 1018G>C & 1021delT & 1022T>G & 1120T>C	R24*	None
BJ32	S83L	None	E62K	None	None	None	None	1174T>G & 1723G>A & 1730C>T & 2132T>A	None	79A>G & 80C>A & 89G>T & 90T>C & 93C>T & 226A>G	1002A>G & 1006C>G & 1010C>T & 1018_1019insA & 1021T>A & 1023delG & 1038T>C & 1120T>C	None	None
CQ1	None	None	A56T & E62K & A620V	I300F	None	D283G & Y358N	None	1211C>T & 1865T>C & 2794C>T & 2796T>C & 2799A>G & 2802G>A	250A>T & 253A>T & 273T>A & 1002G>A & 1006G>C & 1010T>C & 1019delA & 1022A>T & 1023_1024insG & 1038C>T	79A>G & 80C>A & 89G>T & 90T>C & 93C>T & 226A>G & 250A>T & 253A>T & 273T>A & 1002G>A & 1006G>C & 1010T>C & 1019delA & 1022A>T & 1023_1024insG & 1038C>T	250A>T & 253A>T & 273T>A & 1120T>C	None	None
CQ10	S83L & D87N	None	S80I & E62K	S458A	None	D283G & Y358N	None	137T>A & 142A>T & 542_543insA & 544C>A & 545T>G & 546T>C & 548G>A & 549G>T & 550_551insT & 1723G>A & 2211A>G & 2794C>T & 2796T>C & 2799A>G & 2802G>A	79G>A & 80A>C & 89T>G & 90C>T & 93T>C & 250A>T & 253A>T & 273T>A	226A>G & 250A>T & 253A>T & 273T>A	79G>A & 80A>C & 89T>G & 90C>T & 93T>C & 250A>T & 253A>T & 273T>A & 1120T>C	None	None
CQ12	None	None	E62K	None	None	None	A271V	356G>A & 357C>T & 547A>C & 1174T>G & 1865T>C & 2132T>G	155A>G	79A>G & 80C>A & 89G>T & 90T>C & 93C>T & 155A>G & 226A>G	155A>G & 1002A>G & 1006C>G & 1010C>T & 1018_1019insA & 1021T>A & 1023delG & 1038T>C & 1120T>C	None	None
CQ14	None	None	A56T & E62K & A620V	I300F	None	D283G & Y358N	None	1211C>T & 1865T>C & 2794C>T & 2796T>C & 2799A>G & 2802G>A	250A>T & 253A>T & 273T>A & 1002G>A & 1006G>C & 1010T>C & 1019delA & 1022A>T & 1023_1024insG & 1038C>T	79A>G & 80C>A & 89G>T & 90T>C & 93C>T & 226A>G & 250A>T & 253A>T & 273T>A & 1002G>A & 1006G>C & 1010T>C & 1019delA & 1022A>T & 1023_1024insG & 1038C>T	250A>T & 253A>T & 273T>A & 1120T>C	None	None
CQ15	S83L & D87N	None	S80I & E62K	None	None	P220S & D283G & Y358N	None	137T>A & 142A>T & 356G>A & 542_543insA & 544C>A & 545T>G & 546T>C & 548G>A & 549G>T & 550_551insT & 1723G>A & 1865T>C & 2132T>A & 2794C>T & 2796T>C & 2799A>G & 2802G>A	None	79A>G & 80C>A & 89G>T & 90T>C & 93C>T & 226A>G	1002A>G & 1006C>G & 1010C>T & 1018_1019insA & 1021T>A & 1023delG & 1038T>C & 1120T>C	None	None
CQ16	None	None	A56T & E62K & A620V	I300F	None	D283G & Y358N	None	1211C>T & 1723G>A & 1865T>C & 2794C>T & 2796T>C & 2799A>G & 2802G>A	250A>T & 253A>T & 273T>A & 1002G>A & 1006G>C & 1010T>C & 1019delA & 1022A>T & 1023_1024insG & 1038C>T	79A>G & 80C>A & 89G>T & 90T>C & 93C>T & 226A>G & 250A>T & 253A>T & 273T>A & 1002G>A & 1006G>C & 1010T>C & 1019delA & 1022A>T & 1023_1024insG & 1038C>T	250A>T & 253A>T & 273T>A & 1120T>C	None	None
CQ17	S83L & D87N	None	S80I & E62K	None	None	P220S & D283G & Y358N	None	137T>A & 142A>T & 356G>A & 542_543insA & 544C>A & 545T>G & 546T>C & 548G>A & 549G>T & 550_551insT & 1211C>T & 1723G>A & 1865T>C & 2132T>A & 2794C>T & 2796T>C & 2799A>G & 2802G>A	250A>T & 253A>T & 273T>A	79A>G & 80C>A & 89G>T & 90T>C & 93C>T & 226A>G & 250A>T & 253A>T & 273T>A	250A>T & 253A>T & 273T>A & 1002A>G & 1006C>G & 1010C>T & 1018_1019insA & 1021T>A & 1023delG & 1038T>C & 1120T>C	None	None
CQ2	None	None	E62K	None	None	None	A271V	264C>G & 356G>A & 357C>T & 547A>C & 1174T>G & 1865T>C & 2132T>G	79G>A & 80A>C & 89T>G & 90C>T & 93T>C	226A>G	79G>A & 80A>C & 89T>G & 90C>T & 93T>C & 1002A>G & 1006C>G & 1010C>T & 1018_1019insA & 1021T>A & 1023delG & 1038T>C & 1120T>C	None	None
CQ20	S83L & D87N	None	S80I & E62K	None	None	P220S & D283G & Y358N	None	137T>A & 142A>T & 356G>A & 542_543insA & 544C>A & 545T>G & 546T>C & 548G>A & 549G>T & 550_551insT & 1723G>A & 1865T>C & 2794C>T & 2796T>C & 2799A>G & 2802G>A	79G>A & 90C>T	80C>A & 89G>T & 93C>T & 226A>G	79G>A & 90C>T & 1002A>G & 1006C>G & 1010C>T & 1018_1019insA & 1021T>A & 1023delG & 1038T>C & 1120T>C	None	None
CQ21	S83L & D87N	None	S80I & E62K	L416F	None	None	None	285G>A & 356G>A & 357C>T & 1171G>A & 1173delT & 1178C>T & 1211C>T & 1723G>A & 1868_1869insC & 1872_1873insG & 2794C>T & 2796T>C & 2799A>G & 2802G>A	None	79A>G & 80C>A & 89G>T & 90T>C & 93C>T & 226A>G	1002A>G & 1006C>G & 1010C>T & 1018_1019insA & 1021T>A & 1023delG & 1038T>C & 1120T>C	None	None
CQ22	S83L & D87N	None	S80I & E62K	L416F	None	None	None	285G>A & 356G>A & 357C>T & 1171G>A & 1173delT & 1178C>T & 1211C>T & 1723G>A & 1868_1869insC & 1872_1873insG & 2794C>T & 2796T>C & 2799A>G & 2802G>A	None	79A>G & 80C>A & 89G>T & 90T>C & 93C>T & 226A>G	1002A>G & 1006C>G & 1010C>T & 1018_1019insA & 1021T>A & 1023delG & 1038T>C & 1120T>C	None	None
CQ25	S83L & D87N	None	S80I & E62K	L416F	None	None	None	285G>A & 356G>A & 357C>T & 1171G>A & 1173delT & 1178C>T & 1211C>T & 1723G>A & 1868_1869insC & 1872_1873insG & 2794C>T & 2796T>C & 2799A>G & 2802G>A	None	79A>G & 80C>A & 89G>T & 90T>C & 93C>T & 226A>G	1002A>G & 1006C>G & 1010C>T & 1018_1019insA & 1021T>A & 1023delG & 1038T>C & 1120T>C	None	None
CQ26	S83L & D87N	None	S80I & E62K	L416F	None	None	None	285G>A & 356G>A & 357C>T & 1171G>A & 1173delT & 1178C>T & 1211C>T & 1723G>A & 1868_1869insC & 1872_1873insG & 2794C>T & 2796T>C & 2799A>G & 2802G>A	None	79A>G & 80C>A & 89G>T & 90T>C & 93C>T & 226A>G	1002A>G & 1006C>G & 1010C>T & 1018_1019insA & 1021T>A & 1023delG & 1038T>C & 1120T>C	None	None
CQ27	None	None	E62K	None	None	None	None	137T>A & 142A>T	80A>C & 89T>G & 93T>C	79A>G & 90T>C & 226A>G	80A>C & 89T>G & 93T>C & 1002A>G & 1006C>G & 1010C>T & 1018_1019insA & 1021T>A & 1023delG & 1038T>C & 1120T>C	None	None
CQ28	S83L & D87N	None	S80I & E62K	L416F	None	None	None	285G>A & 356G>A & 357C>T & 1171G>A & 1173delT & 1178C>T & 1211C>T & 1723G>A & 1868_1869insC & 1872_1873insG & 2794C>T & 2796T>C & 2799A>G & 2802G>A	None	79A>G & 80C>A & 89G>T & 90T>C & 93C>T & 226A>G	1002A>G & 1006C>G & 1010C>T & 1018_1019insA & 1021T>A & 1023delG & 1038T>C & 1120T>C	None	None
CQ29	S83L & D87N	None	S80I & E62K	L416F	None	None	None	285G>A & 356G>A & 357C>T & 1171G>A & 1173delT & 1178C>T & 1211C>T & 1723G>A & 1868_1869insC & 1872_1873insG & 2794C>T & 2796T>C & 2799A>G & 2802G>A	None	79A>G & 80C>A & 89G>T & 90T>C & 93C>T & 226A>G	1002A>G & 1006C>G & 1010C>T & 1018_1019insA & 1021T>A & 1023delG & 1038T>C & 1120T>C	None	None
CQ3	S83L & D87N	E219K	A56T & S80I & E62K & A620V	None	None	None	None	None	79G>A & 80A>C & 89T>G & 90C>T & 93T>C	226A>G	79G>A & 80A>C & 89T>G & 90C>T & 93T>C & 1002A>G & 1006C>G & 1010C>T & 1018_1019insA & 1021T>A & 1023delG & 1038T>C & 1120T>C	None	None
CQ30	S83L & D87N	None	S80I & E62K	L416F	None	None	None	285G>A & 356G>A & 357C>T & 1171G>A & 1173delT & 1178C>T & 1211C>T & 1723G>A & 1868_1869insC & 1872_1873insG & 2794C>T & 2796T>C & 2799A>G & 2802G>A	None	79A>G & 80C>A & 89G>T & 90T>C & 93C>T & 226A>G	1002A>G & 1006C>G & 1010C>T & 1018_1019insA & 1021T>A & 1023delG & 1038T>C & 1120T>C	None	None
CQ31	S83L & D87N	None	S80I & E62K	None	None	D283G & Y358N	None	137T>A & 142A>T & 1723G>A & 2794C>T & 2796T>C & 2799A>G & 2802G>A	80A>C & 89T>G & 93T>C & 1002G>A & 1006G>C & 1010T>C & 1019delA & 1022A>T & 1023_1024insG & 1038C>T	79A>G & 90T>C & 226A>G & 1002G>A & 1006G>C & 1010T>C & 1019delA & 1022A>T & 1023_1024insG & 1038C>T	80A>C & 89T>G & 93T>C & 1120T>C	None	None
CQ32	S83L & D87N	None	S80I & E62K	L416F	None	None	None	285G>A & 356G>A & 357C>T & 1171G>A & 1173delT & 1178C>T & 1211C>T & 1723G>A & 1868_1869insC & 1872_1873insG & 2794C>T & 2796T>C & 2799A>G & 2802G>A	None	79A>G & 80C>A & 89G>T & 90T>C & 93C>T & 226A>G	1002A>G & 1006C>G & 1010C>T & 1018_1019insA & 1021T>A & 1023delG & 1038T>C & 1120T>C	None	None
CQ33	S83L & D87N	None	S80I & E62K	L416F	None	None	None	285G>A & 356G>A & 357C>T & 1171G>A & 1173delT & 1178C>T & 1211C>T & 1723G>A & 1868_1869insC & 1872_1873insG & 2794C>T & 2796T>C & 2799A>G & 2802G>A	79G>A & 80A>C & 89T>G & 90C>T & 93T>C	226A>G	79G>A & 80A>C & 89T>G & 90C>T & 93T>C & 1002A>G & 1006C>G & 1010C>T & 1018_1019insA & 1021T>A & 1023delG & 1038T>C & 1120T>C	None	None
CQ34	S83L & D87N	None	S80I & E62K	L416F	None	None	None	285G>A & 356G>A & 357C>T & 1171G>A & 1173delT & 1178C>T & 1211C>T & 1723G>A & 1868_1869insC & 1872_1873insG & 2794C>T & 2796T>C & 2799A>G & 2802G>A	79G>A & 80A>C & 89T>G & 90C>T & 93T>C	226A>G	79G>A & 80A>C & 89T>G & 90C>T & 93T>C & 1002A>G & 1006C>G & 1010C>T & 1018_1019insA & 1021T>A & 1023delG & 1038T>C & 1120T>C	None	None
CQ35	S83L & D87N	None	S80I & E62K	L416F	None	None	None	285G>A & 356G>A & 357C>T & 1171G>A & 1173delT & 1178C>T & 1211C>T & 1723G>A & 1868_1869insC & 1872_1873insG & 2794C>T & 2796T>C & 2799A>G & 2802G>A	None	79A>G & 80C>A & 89G>T & 90T>C & 93C>T & 226A>G	1002A>G & 1006C>G & 1010C>T & 1018_1019insA & 1021T>A & 1023delG & 1038T>C & 1120T>C	None	None
CQ36	None	None	E62K	None	None	D283G & Y358N	None	285G>A & 1743G>A & 2231A>G & 2814C>T & 2816T>C & 2819A>G & 2822G>A	None	79A>G & 80C>A & 89G>T & 90T>C & 93C>T & 226A>G	1002A>G & 1006C>G & 1010C>T & 1018_1019insA & 1021T>A & 1023delG & 1038T>C & 1120T>C	None	R694C
CQ4	S83L & D87N	None	S80I & E62K	None	None	P220S & D283G & Y358N	None	137T>A & 142A>T & 356G>A & 542_543insA & 544C>A & 545T>G & 546T>C & 548G>A & 549G>T & 550_551insT & 1723G>A & 1865T>C & 2794C>T & 2796T>C & 2799A>G & 2802G>A	79G>A & 90C>T	80C>A & 89G>T & 93C>T & 226A>G	79G>A & 90C>T & 1002A>G & 1006C>G & 1010C>T & 1018_1019insA & 1021T>A & 1023delG & 1038T>C & 1120T>C	None	None
CQ42	None	None	E62K	V136L	None	D283G & Y358N	None	137T>A & 142A>T & 542_543insA & 544C>A & 545T>G & 546T>C & 548G>A & 549G>T & 550_551insT & 1723G>A & 2203T>G & 2636C>T & 2794C>T & 2796T>C & 2799A>G & 2802G>A	None	79A>G & 80C>A & 89G>T & 90T>C & 93C>T & 226A>G	1002A>G & 1006C>G & 1010C>T & 1018_1019insA & 1021T>A & 1023delG & 1038T>C & 1120T>C	None	None
CQ46	S83L & D87N	V651I	S80I & E62K	None	None	H2R	None	1723G>A & 1730C>T & 1865T>C & 2132T>A & 2794C>T & 2796T>C & 2799A>G & 2802G>A	80A>C & 89T>G & 90C>T & 93T>C & 1002G>A & 1006G>C & 1010T>C & 1019delA & 1022A>T & 1023_1024insG & 1038C>T	79A>G & 226A>G & 1002G>A & 1006G>C & 1010T>C & 1019delA & 1022A>T & 1023_1024insG & 1038C>T	80A>C & 89T>G & 90C>T & 93T>C & 1120T>C	None	None
CQ48	None	None	E62K	V136L	None	D283G & Y358N	None	542_543insA & 544C>A & 545T>G & 546T>C & 548G>A & 549G>T & 550_551insT & 1723G>A & 2203T>G & 2636C>T & 2794C>T & 2796T>C & 2799A>G & 2802G>A	None	79A>G & 80C>A & 89G>T & 90T>C & 93C>T & 226A>G	1002A>G & 1006C>G & 1010C>T & 1018_1019insA & 1021T>A & 1023delG & 1038T>C & 1120T>C	None	None
CQ51	S83L & D87N	V651I	S80I & E62K	None	None	H2R	None	1723G>A & 1730C>T & 1865T>C & 2132T>A & 2794C>T & 2796T>C & 2799A>G & 2802G>A	80A>C & 89T>G & 1002G>A & 1006G>C & 1010T>C & 1019delA & 1022A>T & 1023_1024insG & 1038C>T	79A>G & 90T>C & 93C>T & 226A>G & 1002G>A & 1006G>C & 1010T>C & 1019delA & 1022A>T & 1023_1024insG & 1038C>T	80A>C & 89T>G & 1120T>C	None	None
CQ52	S83L	None	E62K & R681H	None	None	D283G & Y358N	None	137T>A & 142A>T & 264C>G & 1723G>A & 1725T>C & 1726C>G & 1727C>A & 1730C>T & 1733G>T & 1734G>C & 1735A>G & 2794C>T & 2796T>C & 2799A>G & 2802G>A	None	79A>G & 80C>A & 89G>T & 90T>C & 93C>T & 226A>G	1120T>C	None	None
CQ59	S83L & D87N	E219K & A576V	A56T & S80I & E62K & A620V	None	None	None	None	1723G>A & 2794C>T & 2796T>C & 2799A>G & 2802G>A	None	79A>G & 80C>A & 89G>T & 90T>C & 93C>T & 226A>G	1002A>G & 1006C>G & 1010C>T & 1018_1019insA & 1021T>A & 1023delG & 1038T>C & 1120T>C	None	None
CQ63	None	None	E62K	None	None	None	None	356G>A & 2132T>A & 2794C>T & 2796T>C & 2799A>G & 2802G>A	80A>C & 89T>G & 213G>A	79A>G & 90T>C & 93C>T & 213G>A & 226A>G	80A>C & 89T>G & 213G>A & 1002A>G & 1006C>G & 1010C>T & 1018_1019insA & 1021T>A & 1023delG & 1038T>C & 1120T>C	None	None
CQ66	None	None	A56T & E62K & A620V	I300F	None	D283G & Y358N	None	1723G>A & 1730C>T & 1870C>G & 1870_1871insT & 1872_1873insC & 2794C>T & 2796T>C & 2799A>G & 2802G>A	79G>T & 80A>C & 89T>G & 90C>A & 93T>C	79A>T & 90T>A & 226A>G	79G>T & 80A>C & 89T>G & 90C>A & 93T>C & 1120T>C	None	None
CQ67	None	None	E62K	None	None	D283G & Y358N	None	285G>A & 1723G>A & 2794C>T & 2796T>C & 2799A>G & 2802G>A	80A>G	79A>G & 80C>G & 89G>T & 90T>C & 93C>T & 226A>G	80A>G & 1120T>C	None	None
CQ69	S83L & D87N	None	A56T & S80I & E62K & R365H & A620V	None	None	None	None	1723G>A & 1869_1870insG & 1872_1873insG	None	79A>G & 80C>A & 89G>T & 90T>C & 93C>T & 226A>G	1002A>G & 1006C>G & 1010C>T & 1018_1019insA & 1021T>A & 1023delG & 1038T>C & 1120T>C	None	E106D
CQ7	S83L	None	S57T & S80I & E62K & D197E & K200N & D309E & L344R & D475E	None	None	None	None	1723G>A & 1725T>C & 1726C>G & 1727C>A & 1730C>T & 1733G>T & 1734G>C & 1735A>G & 2794C>T & 2796T>C & 2799A>G & 2802G>A	80A>C & 89T>G & 93T>C	79A>G & 90T>C & 226A>G	80A>C & 89T>G & 93T>C & 1002A>G & 1006C>G & 1010C>T & 1018_1019insA & 1021T>A & 1023delG & 1038T>C & 1120T>C	None	None
CQ72	None	None	E62K	None	None	None	None	1366G>A & 1373C>T & 1508T>C & 2437C>T & 2439T>C & 2442A>G & 2445G>A	80A>C & 89T>G & 93T>C	79A>G & 90T>C & 226A>G	80A>C & 89T>G & 93T>C & 1002A>G & 1006C>G & 1010C>T & 1018_1019insA & 1021T>A & 1023delG & 1038T>C & 1120T>C	None	None
CQ73	S83L & D87N	None	A56T & S80I & E62K & A620V	None	None	None	None	1211C>T & 2794C>T & 2796T>C & 2799A>G & 2802G>A	76G>A & 80A>C & 89T>G & 183C>T & 250A>T & 253A>T & 273T>A	76G>A & 79A>G & 90T>C & 93C>T & 183C>T & 226A>G & 250A>T & 253A>T & 273T>A	76G>A & 80A>C & 89T>G & 183C>T & 250A>T & 253A>T & 273T>A & 1002A>G & 1006C>G & 1010C>T & 1018_1019insA & 1021T>A & 1023delG & 1038T>C & 1120T>C	None	None
CQ74	None	None	E62K	R54H	None	D283G & Y358N	None	137T>A & 142A>T & 542_543insA & 544C>A & 545T>G & 546T>C & 548G>A & 549G>T & 550_551insT & 1723G>A & 1730C>T & 1865T>C & 2794C>T & 2796T>C & 2799A>G & 2802G>A	76G>A & 80A>C & 89T>G & 250A>T & 253A>T & 273T>A	76G>A & 79A>G & 90T>C & 93C>T & 226A>G & 250A>T & 253A>T & 273T>A	76G>A & 80A>C & 89T>G & 250A>T & 253A>T & 273T>A & 1002A>G & 1006C>G & 1010C>T & 1018_1019insA & 1021T>A & 1023delG & 1038T>C & 1120T>C	None	None
CQ75	S83L & D87N	None	A56T & S80I & E62K & A620V	None	None	None	None	1211C>T & 2794C>T & 2796T>C & 2799A>G & 2802G>A	76G>A & 80A>C & 89T>G & 183C>T & 250A>T & 253A>T & 273T>A	76G>A & 79A>G & 90T>C & 93C>T & 183C>T & 226A>G & 250A>T & 253A>T & 273T>A	76G>A & 80A>C & 89T>G & 183C>T & 250A>T & 253A>T & 273T>A & 1002A>G & 1006C>G & 1010C>T & 1018_1019insA & 1021T>A & 1023delG & 1038T>C & 1120T>C	None	None
CQ77	None	None	E62K & R724L	None	None	None	None	1174T>G	79G>A & 80A>C & 89T>G & 90C>T & 93T>C	226A>G	79G>A & 80A>C & 89T>G & 90C>T & 93T>C & 1002A>G & 1006C>G & 1010C>T & 1018_1019insA & 1021T>A & 1023delG & 1038T>C & 1120T>C	None	None
CQ78	None	None	E62K	None	None	D283G & Y358N	None	137T>A & 142A>T & 356G>A & 542_543insA & 544C>A & 545T>G & 546T>C & 548G>A & 549G>T & 550_551insT & 1174T>G & 1211C>T & 2636C>T	None	79A>G & 80C>A & 89G>T & 90T>C & 93C>T & 226A>G	1002A>G & 1006C>G & 1010C>T & 1018_1019insA & 1021T>A & 1023delG & 1038T>C & 1120T>C	None	None
CQ79	S83L	None	E62K	None	None	None	None	1174T>G & 2132T>A	226G>A	79A>G & 80C>A & 89G>T & 90T>C & 93C>T	226G>A & 1002A>G & 1006C>G & 1010C>T & 1018_1019insA & 1021T>A & 1023delG & 1038T>C & 1120T>C	None	None
CQ8	S83L & D87N	None	A56T & S80I & E62K	S458A	None	H2R	None	547A>C & 1723G>A & 1868_1869insC & 1872_1873insG	None	79A>G & 80C>A & 89G>T & 90T>C & 93C>T & 226A>G	1002A>G & 1006C>G & 1010C>T & 1018_1019insA & 1021T>A & 1023delG & 1038T>C & 1120T>C	None	None
CQ80	S83L & D87N	None	A56T & S80I & E62K & A620V	None	None	None	None	1211C>T & 2794C>T & 2796T>C & 2799A>G & 2802G>A	76G>A & 80A>C & 89T>G & 183C>T & 250A>T & 253A>T & 273T>A	76G>A & 79A>G & 90T>C & 93C>T & 183C>T & 226A>G & 250A>T & 253A>T & 273T>A	76G>A & 80A>C & 89T>G & 183C>T & 250A>T & 253A>T & 273T>A & 1002A>G & 1006C>G & 1010C>T & 1018_1019insA & 1021T>A & 1023delG & 1038T>C & 1120T>C	None	None
CQ9	S83L & D87N	None	S80I & E62K	None	None	P220S & D283G & Y358N	None	137T>A & 142A>T & 356G>A & 542_543insA & 544C>A & 545T>G & 546T>C & 548G>A & 549G>T & 550_551insT & 1723G>A & 1865T>C & 2794C>T & 2796T>C & 2799A>G & 2802G>A	79G>A & 90C>T	80C>A & 89G>T & 93C>T & 226A>G	79G>A & 90C>T & 1002A>G & 1006C>G & 1010C>T & 1018_1019insA & 1021T>A & 1023delG & 1038T>C & 1120T>C	None	None
CQ92	S83L & D87N	None	S80I & E62K	S458A	G144S	D283G & Y358N	None	137T>A & 142A>T & 316C>T & 1171G>A & 1173delT & 1178C>T & 1211C>T & 1220G>A & 1229C>T & 1723G>A & 1865T>C & 2211A>G & 2794C>T & 2796T>C & 2799A>G & 2802G>A	None	79A>G & 80C>A & 89G>T & 90T>C & 93C>T & 226A>G	1120T>C	None	None
E_coli_RXD10	S83L & D87N & D678E & G835C	None	S80I & E62K	S458A	None	None	F4Y	1211C>T & 1723G>A & 1868_1869insC & 1872_1873insG & 2132T>A & 2794C>T & 2796T>C & 2799A>G & 2802G>A	None	79A>G & 80C>A & 89G>T & 90T>C & 93C>T & 226A>G	1002A>G & 1006C>G & 1010C>T & 1018_1019insA & 1021T>A & 1023delG & 1038T>C & 1120T>C	None	None
E_coli_RXD5	S83L & D87N & D678E & G835C	None	S80I & E62K	S458A	None	None	F4Y	285G>A & 356G>A & 357C>T & 1211C>T & 1723G>A & 1868_1869insC & 1872_1873insG & 2132T>A & 2794C>T & 2796T>C & 2799A>G & 2802G>A	None	79A>G & 80C>A & 89G>T & 90T>C & 93C>T & 226A>G	1002A>G & 1006C>G & 1010C>T & 1018_1019insA & 1021T>A & 1023delG & 1038T>C & 1120T>C	None	None
FJ26	None	None	E62K	None	None	None	None	1171G>A & 1173delT & 1178C>T & 1211C>T & 1723G>A & 1868_1869insC & 1872_1873insG	None	79A>G & 80C>A & 89G>T & 90T>C & 93C>T & 226A>G	1002A>G & 1006C>G & 1010C>T & 1018_1019insA & 1021T>A & 1023delG & 1038T>C & 1120T>C	None	None
FJ38	None	None	E62K	None	None	None	None	285G>A & 1171G>A & 1173delT & 1178C>T & 1211C>T & 1723G>A & 1868_1869insC & 1872_1873insG	79G>A & 90C>T	80C>A & 89G>T & 93C>T & 226A>G	79G>A & 90C>T & 1002A>G & 1006C>G & 1010C>T & 1018_1019insA & 1021T>A & 1023delG & 1038T>C & 1120T>C	None	None
FY119	None	None	E62K	None	None	D283G & Y358N	None	137T>A & 142A>T & 1723G>A & 1865T>C & 2636C>T & 2794C>T & 2796T>C & 2799A>G & 2802G>A	None	79A>G & 80C>A & 89G>T & 90T>C & 93C>T & 226A>G	1120T>C	None	None
FY183	S83L & D87N & T611S & D678E	None	S80I & E62K	D420N	None	None	None	316C>T & 1174T>G & 2794C>T & 2796T>C & 2799A>G & 2802G>A	None	79A>G & 80C>A & 89G>T & 90T>C & 93C>T & 226A>G	1002A>G & 1006C>G & 1010C>T & 1018_1019insA & 1021T>A & 1023delG & 1038T>C & 1120T>C	None	None
FY187	None	None	E62K	None	None	None	None	356G>A & 1174T>G & 1723G>A & 1868_1869insC & 1872_1873insG	None	79A>G & 80C>A & 89G>T & 90T>C & 93C>T & 226A>G	1120T>C	None	None
FY197	S83L & D87N & V758I	None	S80I & E62K	None	None	None	None	264C>G & 1171G>A & 1173delT & 1178C>T & 1211C>T & 1723G>A & 1865T>C & 2132T>G & 2794C>T & 2796T>C & 2799A>G & 2802G>A	None	79A>G & 80C>A & 89G>T & 90T>C & 93C>T & 226A>G	1002A>G & 1006C>G & 1010C>T & 1018_1019insA & 1021T>A & 1023delG & 1038T>C & 1120T>C	None	None
FY207	S83L & D87N & D678E	None	S57T & S80I & E62K & D197E & K200N & D309E & L344R & D475E	None	None	None	None	1171G>A & 1173delT & 1178C>T & 1211C>T & 1723G>A & 1725T>C & 1726C>G & 1727C>A & 1730C>T & 1733G>T & 1734G>C & 1735A>G & 1865T>C & 2794C>T & 2796T>C & 2799A>G & 2802G>A	None	79A>G & 80C>A & 89G>T & 90T>C & 93C>T & 226A>G	1002A>G & 1006C>G & 1010C>T & 1018_1019insA & 1021T>A & 1023delG & 1038T>C & 1120T>C	None	None
FY209	S83L	None	E62K	None	None	None	None	1174T>G & 1723G>A & 1730C>T & 1865T>C & 2132T>A & 2203T>G & 2794C>T & 2796T>C & 2799A>G & 2802G>A	None	79A>G & 80C>A & 89G>T & 90T>C & 93C>T & 226A>G	1002A>G & 1006C>G & 1010C>T & 1018_1019insA & 1021T>A & 1023delG & 1038T>C & 1120T>C	None	None
FY213	S83L & D87N	None	S80I & E62K	None	None	P220S & D283G & Y358N	None	137T>A & 142A>T & 356G>A & 542_543insA & 544C>A & 545T>G & 546T>C & 548G>A & 549G>T & 550_551insT & 1723G>A & 1865T>C & 2794C>T & 2796T>C & 2799A>G & 2802G>A	79G>A & 90C>T	80C>A & 89G>T & 93C>T & 226A>G	79G>A & 90C>T & 1002A>G & 1006C>G & 1010C>T & 1018_1019insA & 1021T>A & 1023delG & 1038T>C & 1120T>C	None	None
FY215	S83L & D678E & A828S	S492N & A618T & E656D	E62K & D475E	T172A	None	H2R & D283G & A360V	None	356G>A & 541delA & 543G>T & 546_547insA & 548G>T & 550C>G & 552delT & 1220G>A & 1229C>T & 1723G>A & 1870C>G & 1870_1871insT & 1872_1873insC & 2163A>G & 2205A>G & 2209G>C & 2211A>G & 2215C>G & 2794C>T	264C>A & 1002G>A & 1006G>C & 1010T>C & 1019delA & 1022A>T & 1023_1024insG & 1038C>T	79A>G & 80C>A & 89G>T & 90T>C & 93C>T & 226A>G & 264C>A & 1002G>A & 1006G>C & 1010T>C & 1019delA & 1022A>T & 1023_1024insG & 1038C>T	264C>A & 1120T>C	None	None
FY216	S83L & D87N	None	S80I & E62K	None	None	P220S & D283G & Y358N	None	137T>A & 142A>T & 356G>A & 542_543insA & 544C>A & 545T>G & 546T>C & 548G>A & 549G>T & 550_551insT & 1723G>A & 1865T>C & 2794C>T & 2796T>C & 2799A>G & 2802G>A	None	None	729A>G & 733C>G & 737C>T & 745_746insA & 748T>A & 750delG & 765T>C & 847T>C	None	None
FY217	S83L & D87N	None	S80I & E62K	None	None	None	None	541delA & 543G>T & 544_545insT & 548G>T & 550C>G & 552delT & 1211C>T & 1723G>A & 1865T>C & 2132T>A	1002G>A & 1006G>C & 1010T>C & 1019delA & 1022A>T & 1023_1024insG & 1038C>T	79A>G & 80C>A & 89G>T & 90T>C & 93C>T & 226A>G & 1002G>A & 1006G>C & 1010T>C & 1019delA & 1022A>T & 1023_1024insG & 1038C>T	1120T>C	None	None
FY219	S83L & T661I	None	S80I & E62K	None	None	None	None	1174T>G & 1723G>A & 1730C>T & 1865T>C	80A>C & 89T>G & 93T>C	79A>G & 90T>C & 226A>G	80A>C & 89T>G & 93T>C & 1002A>G & 1006C>G & 1010C>T & 1018_1019insA & 1021T>A & 1023delG & 1038T>C & 1120T>C	None	None
FY227	S83L & T661I	None	S80I & E62K	None	None	None	None	1174T>G & 1723G>A & 1730C>T & 1865T>C	80A>C & 89T>G & 90C>T & 93T>C	79A>G & 226A>G	80A>C & 89T>G & 90C>T & 93T>C & 1002A>G & 1006C>G & 1010C>T & 1018_1019insA & 1021T>A & 1023delG & 1038T>C & 1120T>C	None	None
FY228	S83L	None	E62K	L416F	None	None	None	285G>A & 547A>C & 1723G>A & 1725T>C & 1726C>G & 1727C>A & 1730C>T & 1733G>T & 1734G>C & 1735A>G & 1865T>C & 2132T>G	250A>T & 253A>T & 273T>A	79A>G & 80C>A & 89G>T & 90T>C & 93C>T & 226A>G & 250A>T & 253A>T & 273T>A	250A>T & 253A>T & 273T>A & 1002A>G & 1006C>G & 1010C>T & 1018_1019insA & 1021T>A & 1023delG & 1038T>C & 1120T>C	None	None
FY229	S83L & D87Y	None	S80I & E62K	S458A	G144S	D283G & Y358N	None	137T>A & 142A>T & 316C>T & 1174T>G & 2794C>T & 2796T>C & 2799A>G & 2802G>A	80A>C & 89T>G & 93T>C & 1002G>A & 1006G>C & 1010T>C & 1019delA & 1022A>T & 1023_1024insG & 1038C>T	79A>G & 90T>C & 226A>G & 1002G>A & 1006G>C & 1010T>C & 1019delA & 1022A>T & 1023_1024insG & 1038C>T	80A>C & 89T>G & 93T>C & 1120T>C	None	None
FY230	None	V201I	E62K & R681H	None	None	D283G & Y358N	None	137T>A & 142A>T & 264C>G & 1723G>A & 2203T>G & 2794C>T & 2796T>C & 2799A>G & 2802G>A	250A>T & 253A>T & 273T>A	79A>G & 80C>A & 89G>T & 90T>C & 93C>T & 226A>G & 250A>T & 253A>T & 273T>A	250A>T & 253A>T & 273T>A & 1120T>C	None	None
FY237	None	None	E62K	None	None	H2R & T344A	None	1174T>G & 1723G>A & 1730C>T & 2209G>C	1136C>T	79A>G & 80C>A & 89G>T & 90T>C & 93C>T & 226A>G & 1136C>T	1002A>G & 1006C>G & 1010C>T & 1018_1019insA & 1021T>A & 1023delG & 1038T>C & 1120T>C & 1136C>T	None	None
FY239	None	None	E62K	None	None	D283G & Y358N	None	137T>A & 142A>T & 1211C>T & 1231C>T & 1240G>A & 1743G>A & 2814C>T & 2816T>C & 2819A>G & 2822G>A	250A>T & 253A>T & 273T>A & 1002G>A & 1006G>C & 1010T>C & 1019delA & 1022A>T & 1023_1024insG & 1038C>T	79A>G & 80C>A & 89G>T & 90T>C & 93C>T & 226A>G & 250A>T & 253A>T & 273T>A & 1002G>A & 1006G>C & 1010T>C & 1019delA & 1022A>T & 1023_1024insG & 1038C>T	250A>T & 253A>T & 273T>A & 1120T>C	None	None
FY240	S83L & D678E	E185D	E62K & D475E	None	None	H2R & D283G	None	356G>A & 541delA & 543G>T & 544_545insT & 548G>T & 550C>G & 552delT & 1171G>A & 1174T>G & 1175delA & 1178C>T & 1211C>T & 1220G>A & 1229C>T & 1483G>A & 1714T>C & 1723G>A & 1869_1870insG & 1870C>T & 1872_1873insC & 2205A>G & 2209G>C & 2211A>G & 2215C>G & 2775G>A & 2793C>G & 2794C>A & 2802G>T & 2803G>C	79G>A & 80A>C & 89T>G & 90C>T & 93T>C & 1002G>A & 1006G>C & 1010T>C & 1019delA & 1022A>T & 1023_1024insG & 1038C>T	226A>G & 1002G>A & 1006G>C & 1010T>C & 1019delA & 1022A>T & 1023_1024insG & 1038C>T	79G>A & 80A>C & 89T>G & 90C>T & 93T>C & 1120T>C	R8C & L9R & R11Q & R24*	None
FY241	S83L & D87N	None	S80I & E84A & E62K	None	G144S	D283G & Y358N	None	137T>A & 142A>T & 1174T>G & 1211C>T & 1220G>A & 1229C>T & 1723G>A & 1865T>C & 2794C>T & 2796T>C & 2799A>G & 2802G>A	80A>C & 89T>G & 93T>C	79A>G & 90T>C & 226A>G	80A>C & 89T>G & 93T>C & 1120T>C	None	None
FY246	S83L & D87N & D678E	None	S57T & S80I & E62K & D197E & K200N & D309E & L344R & D475E	None	None	None	None	1171G>A & 1173delT & 1178C>T & 1211C>T & 1723G>A & 1725T>C & 1726C>G & 1727C>A & 1730C>T & 1733G>T & 1734G>C & 1735A>G & 1865T>C & 2794C>T & 2796T>C & 2799A>G & 2802G>A	None	79A>G & 80C>A & 89G>T & 90T>C & 93C>T & 226A>G	1002A>G & 1006C>G & 1010C>T & 1018_1019insA & 1021T>A & 1023delG & 1038T>C & 1120T>C	None	None
FY248	S83L	None	E62K & E84Q	None	None	H2R	None	356G>A & 357C>T & 1723G>A	None	79A>G & 80C>A & 89G>T & 90T>C & 93C>T & 226A>G	1002A>G & 1006C>G & 1010C>T & 1018_1019insA & 1021T>A & 1023delG & 1038T>C & 1120T>C	None	None
FY249	S83L & D87H & P872S	None	S80I & E62K	L416F	None	V161G	None	264C>G & 1174T>G & 1211C>T & 1220G>A & 1229C>T & 1723G>A	None	79A>G & 80C>A & 89G>T & 90T>C & 93C>T & 226A>G	1120T>C	None	None
FY251	S83L	None	G78C & E62K	None	None	D283G & Y358N	A40E	285G>A & 541A>T & 1723G>A & 2794C>T & 2796T>C & 2799A>G & 2802G>A	250A>T & 253A>T & 273T>A	79A>G & 80C>A & 89G>T & 90T>C & 93C>T & 226A>G & 250A>T & 253A>T & 273T>A	250A>T & 253A>T & 273T>A & 1002A>G & 1006C>G & 1010C>T & 1018_1019insA & 1021T>A & 1023delG & 1038T>C & 1120T>C	None	None
FY252	S83L & D87H & P872S	None	S80I & E62K	L416F	None	V161G	None	264C>G & 1174T>G & 1211C>T & 1220G>A & 1229C>T & 1723G>A	None	79A>G & 80C>A & 89G>T & 90T>C & 93C>T & 226A>G	1120T>C	None	None
FY253	S83L	None	E62K	L416F	V141I	H2R	None	547A>C & 713G>C & 1865T>C	80A>C & 89T>G & 93T>C	79A>G & 90T>C & 226A>G	80A>C & 89T>G & 93T>C & 1002A>G & 1006C>G & 1010C>T & 1018_1019insA & 1021T>A & 1023delG & 1038T>C & 1120T>C	None	None
FY256	S83L & D87N	None	S80I & E62K	None	None	H2R	None	1174T>G & 1723G>A & 1730C>T & 1865T>C & 2132T>G & 2211A>G & 2794C>T & 2796T>C & 2799A>G & 2802G>A	None	79A>G & 80C>A & 89G>T & 90T>C & 93C>T & 226A>G	1002A>G & 1006C>G & 1010C>T & 1018_1019insA & 1021T>A & 1023delG & 1038T>C & 1120T>C	None	None
FY257	S83L & D87N	None	S80I & E62K	None	None	P220S & D283G & Y358N	T62M	137T>A & 142A>T & 356G>A & 542_543insA & 544C>A & 545T>G & 546T>C & 548G>A & 549G>T & 550_551insT & 1723G>A & 1865T>C & 2794C>T & 2796T>C & 2799A>G & 2802G>A	250A>T & 253A>T & 273T>A	79A>G & 80C>A & 89G>T & 90T>C & 93C>T & 226A>G & 250A>T & 253A>T & 273T>A	250A>T & 253A>T & 273T>A & 1002A>G & 1006C>G & 1010C>T & 1018_1019insA & 1021T>A & 1023delG & 1038T>C & 1120T>C	None	None
FY261	S83L & D87N	None	S80I & E62K	None	None	P220S & D283G & Y358N	T62M	137T>A & 142A>T & 356G>A & 542_543insA & 544C>A & 545T>G & 546T>C & 548G>A & 549G>T & 550_551insT & 1723G>A & 1865T>C & 2794C>T & 2796T>C & 2799A>G & 2802G>A	250A>T & 253A>T & 273T>A	79A>G & 80C>A & 89G>T & 90T>C & 93C>T & 226A>G & 250A>T & 253A>T & 273T>A	250A>T & 253A>T & 273T>A & 1002A>G & 1006C>G & 1010C>T & 1018_1019insA & 1021T>A & 1023delG & 1038T>C & 1120T>C	None	None
FY262	D678E & D741E	None	E62K	A402T	None	None	None	547A>C & 1174T>G & 1723G>A & 1730C>T & 1865T>C & 2794C>T & 2796T>C & 2799A>G & 2802G>A	79G>A & 80A>C & 89T>G & 90C>T & 93T>C	226A>G	79G>A & 80A>C & 89T>G & 90C>T & 93T>C & 1002A>G & 1006C>G & 1010C>T & 1018_1019insA & 1021T>A & 1023delG & 1038T>C & 1120T>C	None	None
FY267	S83L & D87N	None	S80I & E62K	None	None	P220S & D283G & Y358N	T62M	137T>A & 142A>T & 356G>A & 542_543insA & 544C>A & 545T>G & 546T>C & 548G>A & 549G>T & 550_551insT & 1723G>A & 1865T>C & 2794C>T & 2796T>C & 2799A>G & 2802G>A	250A>T & 253A>T & 273T>A	79A>G & 80C>A & 89G>T & 90T>C & 93C>T & 226A>G & 250A>T & 253A>T & 273T>A	250A>T & 253A>T & 273T>A & 1002A>G & 1006C>G & 1010C>T & 1018_1019insA & 1021T>A & 1023delG & 1038T>C & 1120T>C	None	None
FY268	S83L	None	E62K	L416F	V141I	H2R	None	547A>C & 713G>C & 1723G>A & 1730C>T	80A>C & 89T>G & 93T>C	79A>G & 90T>C & 226A>G	80A>C & 89T>G & 93T>C & 1002A>G & 1006C>G & 1010C>T & 1018_1019insA & 1021T>A & 1023delG & 1038T>C & 1120T>C	None	None
FY44	S83L & D87N	None	S80I & E62K	None	E23K	H2R	None	1211C>T & 1723G>A & 1730C>T & 1865T>C & 2132T>A & 2794C>T & 2796T>C & 2799A>G & 2802G>A	80A>C & 89T>G & 90C>T & 93T>C & 1002G>A & 1006G>C & 1010T>C & 1019delA & 1022A>T & 1023_1024insG & 1038C>T	79A>G & 226A>G & 1002G>A & 1006G>C & 1010T>C & 1019delA & 1022A>T & 1023_1024insG & 1038C>T	80A>C & 89T>G & 90C>T & 93T>C & 1120T>C	None	None
FY45	S83L & D87N	None	S80I & E62K	L416F	None	H2R	None	1865T>C	80A>C & 89T>G & 93T>C & 183C>T & 250A>T & 253A>T & 273T>A	79A>G & 90T>C & 183C>T & 226A>G & 250A>T & 253A>T & 273T>A	80A>C & 89T>G & 93T>C & 183C>T & 250A>T & 253A>T & 273T>A & 1002A>G & 1006C>G & 1010C>T & 1018_1019insA & 1021T>A & 1023delG & 1038T>C & 1120T>C	None	None
FY48	S83L & D87N & D678E	None	S80I & E62K	S458A	None	None	F4Y	1211C>T & 1723G>A & 2132T>A & 2794C>T & 2796T>C & 2799A>G & 2802G>A	None	79A>G & 80C>A & 89G>T & 90T>C & 93C>T & 226A>G	1002A>G & 1006C>G & 1010C>T & 1018_1019insA & 1021T>A & 1023delG & 1038T>C & 1120T>C	None	None
FY66	None	None	E62K	None	None	None	None	1097T>C	None	79A>G & 80C>A & 89G>T & 90T>C & 93C>T & 226A>G	1002A>G & 1006C>G & 1010C>T & 1018_1019insA & 1021T>A & 1023delG & 1038T>C & 1120T>C	None	None
FY74	S83L	None	S80I & E62K & R406W	None	None	None	None	264C>G & 846T>C & 1171G>A & 1173delT & 1178C>T & 1211C>T & 1723G>A & 1725T>C & 1726C>G & 1727C>A & 1730C>T & 1733G>T & 1734G>C & 1735A>G & 2132T>G & 2794C>T & 2796T>C & 2799A>G & 2802G>A	79G>A & 80A>C & 89T>G & 90C>T & 93T>C	226A>G	79G>A & 80A>C & 89T>G & 90C>T & 93T>C & 1002A>G & 1006C>G & 1010C>T & 1018_1019insA & 1021T>A & 1023delG & 1038T>C & 1120T>C	None	None
GD40	S83L & D678E	E703D	E62K	L416F	None	H2R & S138N & D283G	None	137T>A & 142A>T & 264C>G & 541delA & 543G>T & 544_545insT & 548G>T & 550C>G & 552delT & 2794C>T & 2796T>C & 2797T>C & 2799A>G & 2802G>A	None	79A>G & 80C>A & 89G>T & 90T>C & 93C>T & 226A>G	1120T>C	R24*	None
GS100	S83L & D87N	None	A56T & S80I & E62K	S458A	None	None	None	547A>C & 1211C>T & 1723G>A	80A>C & 89T>G & 93T>C	79A>G & 90T>C & 226A>G	80A>C & 89T>G & 93T>C & 1120T>C	None	None
GS105	S83L & D87Y	None	S80I & E62K	None	None	H2R	None	547A>C & 1174T>G & 1723G>A & 1730C>T & 1868_1869insC & 1872_1873insG & 2209G>C & 2215C>G	80A>C & 89T>G & 93T>C & 1136C>T	79A>G & 90T>C & 226A>G & 1136C>T	80A>C & 89T>G & 93T>C & 1002A>G & 1006C>G & 1010C>T & 1018_1019insA & 1021T>A & 1023delG & 1038T>C & 1120T>C & 1136C>T	None	None
GS123	S83L	None	E62K	None	None	D50N	None	1723G>A & 2794C>T & 2796T>C & 2799A>G & 2802G>A	None	79A>G & 80C>A & 89G>T & 90T>C & 93C>T & 226A>G	1002A>G & 1006C>G & 1010C>T & 1018_1019insA & 1021T>A & 1023delG & 1038T>C & 1120T>C	None	None
GS128	None	None	E62K	None	None	H2R	None	137T>A & 142A>T & 264C>G & 356G>A & 357C>T & 1211C>T & 1723G>A & 1725T>C & 1726C>G & 1727C>A & 1730C>T & 1733G>T & 1734G>C & 1735A>G & 1865T>C & 2794C>T & 2796T>C & 2799A>G & 2802G>A	None	79A>G & 80C>A & 89G>T & 90T>C & 93C>T & 226A>G	1002A>G & 1006C>G & 1010C>T & 1018_1019insA & 1021T>A & 1023delG & 1038T>C & 1120T>C	None	None
GS133	P872S	None	E62K	None	None	None	None	264C>G & 312G>A & 1171G>A & 1173delT & 1178C>T & 1211C>T & 1723G>A & 1725T>C & 1726C>G & 1727C>A & 1730C>T & 1733G>T & 1734G>C & 1735A>G & 2794C>T & 2796T>C & 2799A>G & 2802G>A	None	79A>G & 80C>A & 89G>T & 90T>C & 93C>T & 226A>G	1002A>G & 1006C>G & 1010C>T & 1018_1019insA & 1021T>A & 1023delG & 1038T>C & 1120T>C	None	None
GS138	None	None	E62K	None	None	D283G & Y358N	None	137T>A & 142A>T & 542_543insA & 544C>A & 545T>G & 546T>C & 548G>A & 549G>T & 550_551insT & 1211C>T & 1723G>A & 2794C>T & 2796T>C & 2799A>G & 2802G>A	None	79A>G & 80C>A & 89G>T & 90T>C & 93C>T & 226A>G	1120T>C	None	None
GS16	S83L	None	E62K	None	None	H2R	None	137T>A & 142A>T & 350G>A & 356G>A & 357C>T & 1211C>T & 1723G>A & 1865T>C & 2132T>G & 2794C>T & 2796T>C & 2799A>G & 2802G>A	80A>C & 89T>G	79A>G & 90T>C & 93C>T & 226A>G	80A>C & 89T>G & 1002A>G & 1006C>G & 1010C>T & 1018_1019insA & 1021T>A & 1023delG & 1038T>C & 1120T>C	None	None
GS191	S83L & D87N	None	S80I & E62K & A620T	None	None	D283G & Y358N	None	137T>A & 142A>T & 356G>A & 542_543insA & 544C>A & 545T>G & 546T>C & 548G>A & 549G>T & 550_551insT & 1723G>A & 2636C>T & 2794C>T & 2796T>C & 2799A>G & 2802G>A	None	79A>G & 80C>A & 89G>T & 90T>C & 93C>T & 226A>G	1002A>G & 1006C>G & 1010C>T & 1018_1019insA & 1021T>A & 1023delG & 1038T>C & 1120T>C	None	None
GS207	S83L & D87N	E185D & S492N & A618T	S80I & E84G & E62K & R236L & D475E	I355T & V136I & V153I	None	H2R & D283G & A360V	None	137T>A & 142A>T & 356G>A & 541delA & 543G>T & 546_547insT & 548G>T & 550C>G & 552delT & 1171G>A & 1173delT & 1178C>T & 1211C>T & 1220G>A & 1229C>T & 1723G>A & 1725T>C & 1726C>G & 1727C>A & 1730C>T & 1733G>T & 1734G>C & 1735A>G & 1869_1870insG & 1870C>T & 1872_1873insC & 2163A>G & 2205A>G & 2794C>T & 2796T>C & 2799A>G & 2802G>A	76G>A & 80A>C & 89T>G & 149A>G & 183C>T & 1002G>A & 1006G>C & 1010T>C & 1019delA & 1022A>T & 1023_1024insG & 1038C>T	76G>A & 79A>G & 90T>C & 93C>T & 149A>G & 183C>T & 226A>G & 1002G>A & 1006G>C & 1010T>C & 1019delA & 1022A>T & 1023_1024insG & 1038C>T	76G>A & 80A>C & 89T>G & 149A>G & 183C>T & 1120T>C	None	None
GS208	S83L & D87Y & A863V	S492N & A618T	S80I & E84G & E62K & D475E	I355T & V136I & V153I	None	H2R & D283G	None	277delA & 279G>T & 282_283insA & 284G>T & 286C>G & 288delT & 907G>A & 909delT & 914C>T & 947C>T & 956G>A & 965C>T & 1242T>C & 1243C>T & 1459G>A & 1605_1606insG & 1606C>T & 1608_1609insC & 1899A>G & 1941A>G & 1945G>C & 1947A>G & 1951C>G & 2530C>T & 2532T>C & 2535A>G & 2538G>A	None	79A>G & 80C>A & 89G>T & 90T>C & 93C>T & 226A>G	1002A>G & 1006C>G & 1010C>T & 1018_1019insA & 1021T>A & 1023delG & 1038T>C & 1120T>C	R24*	None
GS29	S83L & D87N & A828T	None	S80I & E62K	None	None	D283G & Y358N	None	137T>A & 142A>T & 542_543insA & 544C>A & 545T>G & 546T>C & 548G>A & 549G>T & 550_551insT & 1211C>T & 2211A>G & 2794C>T & 2796T>C & 2799A>G & 2802G>A	250A>T & 253A>T & 273T>A	79A>G & 80C>A & 89G>T & 90T>C & 93C>T & 226A>G & 250A>T & 253A>T & 273T>A	250A>T & 253A>T & 273T>A & 1120T>C	None	None
GS3	None	None	E62K	None	None	D283G & Y358N	A125T	137T>A & 142A>T & 356G>A & 542_543insA & 544C>A & 545T>G & 546T>C & 548G>A & 549G>T & 550_551insT & 1231C>T & 1240G>A & 1249C>T & 1743G>A & 1745T>C & 1746C>G & 1747C>A & 1750C>T & 1753G>T & 1754G>C & 1755A>G & 1885T>C	None	79A>G & 80C>A & 89G>T & 90T>C & 93C>T & 226A>G	1002A>G & 1006C>G & 1010C>T & 1018_1019insA & 1021T>A & 1023delG & 1038T>C & 1120T>C	None	None
GS33	S83L & D87N	None	S80I & E62K	None	None	P220S & D283G & Y358N	None	137T>A & 142A>T & 356G>A & 542_543insA & 544C>A & 545T>G & 546T>C & 548G>A & 549G>T & 550_551insT & 1723G>A & 1865T>C & 2794C>T & 2796T>C & 2799A>G & 2802G>A	250A>T & 253A>T & 273T>A	79A>G & 80C>A & 89G>T & 90T>C & 93C>T & 226A>G & 250A>T & 253A>T & 273T>A	250A>T & 253A>T & 273T>A & 1002A>G & 1006C>G & 1010C>T & 1018_1019insA & 1021T>A & 1023delG & 1038T>C & 1120T>C	None	None
GS34	S83L & D87N	None	S80I & E62K	None	None	P220S & D283G & Y358N	None	137T>A & 142A>T & 356G>A & 542_543insA & 544C>A & 545T>G & 546T>C & 548G>A & 549G>T & 550_551insT & 1723G>A & 1865T>C & 2794C>T & 2796T>C & 2799A>G & 2802G>A	76G>A & 250A>T & 253A>T & 273T>A	76G>A & 79A>G & 80C>A & 89G>T & 90T>C & 93C>T & 226A>G & 250A>T & 253A>T & 273T>A	76G>A & 250A>T & 253A>T & 273T>A & 1002A>G & 1006C>G & 1010C>T & 1018_1019insA & 1021T>A & 1023delG & 1038T>C & 1120T>C	None	None
GS35	S83L & D87N	None	S80I & E62K	None	None	P220S & D283G & Y358N	None	137T>A & 142A>T & 356G>A & 542_543insA & 544C>A & 545T>G & 546T>C & 548G>A & 549G>T & 550_551insT & 1723G>A & 1865T>C & 2794C>T & 2796T>C & 2799A>G & 2802G>A	250A>T & 253A>T & 273T>A	79A>G & 80C>A & 89G>T & 90T>C & 93C>T & 226A>G & 250A>T & 253A>T & 273T>A	250A>T & 253A>T & 273T>A & 1002A>G & 1006C>G & 1010C>T & 1018_1019insA & 1021T>A & 1023delG & 1038T>C & 1120T>C	None	None
GS4	S83L	None	S80R & E62K	None	None	None	None	1171G>A & 1173delT & 1178C>T & 1211C>T & 1723G>A & 1868_1869insC & 1872_1873insG & 2794C>T & 2796T>C & 2799A>G & 2802G>A	None	79A>G & 80C>A & 89G>T & 90T>C & 93C>T & 226A>G	1002A>G & 1006C>G & 1010C>T & 1018_1019insA & 1021T>A & 1023delG & 1038T>C & 1120T>C	None	None
GS47	None	None	E62K	None	None	D283G & Y358N	None	137T>A & 142A>T & 356G>A & 562_563insA & 564C>A & 565T>G & 566T>C & 568G>A & 569G>T & 570_571insT & 1194T>G & 2814C>T & 2816T>C & 2819A>G & 2822G>A	80A>C & 89T>G & 90C>T & 93T>C & 250A>T & 253A>T & 273T>A	79A>G & 226A>G & 250A>T & 253A>T & 273T>A	80A>C & 89T>G & 90C>T & 93T>C & 250A>T & 253A>T & 273T>A & 1002A>G & 1006C>G & 1010C>T & 1018_1019insA & 1021T>A & 1023delG & 1038T>C & 1120T>C	None	None
GS58	None	None	E62K	None	D58N	D283G & Y358N	None	316C>T & 2794C>T & 2796T>C & 2799A>G & 2802G>A	76G>A & 80A>C & 89T>G & 250A>T & 253A>T & 273T>A	76G>A & 79A>G & 90T>C & 93C>T & 226A>G & 250A>T & 253A>T & 273T>A	76G>A & 80A>C & 89T>G & 250A>T & 253A>T & 273T>A & 1120T>C	None	None
GS59	S83L & T611S & D678E	None	E62K & T623I	None	None	H2R	None	1211C>T & 1723G>A & 1865T>C & 2132T>A & 2794C>T & 2796T>C & 2799A>G & 2802G>A	80A>C & 89T>G & 250A>T & 253A>T & 273T>A & 1002G>A & 1006G>C & 1010T>C & 1019delA & 1022A>T & 1023_1024insG & 1038C>T	79A>G & 90T>C & 93C>T & 226A>G & 250A>T & 253A>T & 273T>A & 1002G>A & 1006G>C & 1010T>C & 1019delA & 1022A>T & 1023_1024insG & 1038C>T	80A>C & 89T>G & 250A>T & 253A>T & 273T>A & 1120T>C	None	None
GS6	D678E	None	E62K	None	T10A	H2R	None	137T>A & 142A>T & 540_541insC & 541A>T & 543G>T & 544C>T & 548G>T & 550C>G & 552delT & 1723G>A & 1725T>C & 1726C>G & 1727C>A & 1730C>T & 1733G>T & 1734G>C & 1735A>G & 1865T>C & 2211A>G & 2794C>T & 2796T>C & 2799A>G & 2802G>A	1002G>A & 1006G>C & 1007T>C & 1010T>G & 1011C>T & 1018G>A & 1019A>C & 1022A>G & 1023T>G & 1038C>T	79A>G & 80C>A & 89G>T & 90T>C & 93C>T & 226A>G & 1002G>A & 1006G>C & 1007T>C & 1010T>G & 1011C>T & 1018G>A & 1019A>C & 1022A>G & 1023T>G & 1038C>T	1007T>C & 1010C>G & 1011C>T & 1017_1018insA & 1018G>C & 1021delT & 1022T>G & 1120T>C	N5Y	N235S
GS61	S83L & D87N & D678E	None	S57T & S80I & E62K & D197E & K200N & D309E & L344R & D475E	None	None	None	None	137T>A & 142A>T & 547A>C & 1211C>T & 1723G>A & 1870C>G & 1870_1871insT & 1872_1873insC & 2794C>T & 2796T>C & 2799A>G & 2802G>A	48C>T & 80A>C & 89T>G & 93T>C & 1002G>A & 1006G>C & 1010T>C & 1019delA & 1022A>T & 1023_1024insG & 1038C>T	48C>T & 79A>G & 90T>C & 226A>G & 1002G>A & 1006G>C & 1010T>C & 1019delA & 1022A>T & 1023_1024insG & 1038C>T	48C>T & 80A>C & 89T>G & 93T>C & 1120T>C	None	None
GS62	None	None	E62K	None	None	D283G & Y358N	None	316C>T & 1723G>A & 1865T>C & 2794C>T & 2796T>C & 2799A>G & 2802G>A	80A>C & 89T>G & 250A>T & 253A>T & 273T>A	79A>G & 90T>C & 93C>T & 226A>G & 250A>T & 253A>T & 273T>A	80A>C & 89T>G & 250A>T & 253A>T & 273T>A & 1120T>C	None	None
GS72	None	None	E62K	None	None	D283G & Y358N	None	316C>T & 1723G>A & 1865T>C & 2794C>T & 2796T>C & 2799A>G & 2802G>A	80A>C & 89T>G & 250A>T & 253A>T & 273T>A	79A>G & 90T>C & 93C>T & 226A>G & 250A>T & 253A>T & 273T>A	80A>C & 89T>G & 250A>T & 253A>T & 273T>A & 1120T>C	None	None
GS78	None	None	E62K	None	D58N	D283G & Y358N	None	316C>T & 1723G>A & 1865T>C & 2794C>T & 2796T>C & 2799A>G & 2802G>A	76G>A & 80A>C & 89T>G & 250A>T & 253A>T & 273T>A	76G>A & 79A>G & 90T>C & 93C>T & 226A>G & 250A>T & 253A>T & 273T>A	76G>A & 80A>C & 89T>G & 250A>T & 253A>T & 273T>A & 1120T>C	None	None
GS8	S83L & D87N & D678E	None	S80I & E62K	S458A	None	None	F4Y	1171G>A & 1173delT & 1178C>T & 1211C>T & 1723G>A & 2132T>A & 2794C>T & 2796T>C & 2799A>G & 2802G>A	None	79A>G & 80C>A & 89G>T & 90T>C & 93C>T & 226A>G	1002A>G & 1006C>G & 1010C>T & 1018_1019insA & 1021T>A & 1023delG & 1038T>C & 1120T>C	None	None
GS82	S83L & D87N & D678E	None	S80I & E62K	S458A	None	D283G & Y358N	None	137T>A & 142A>T & 542_543insA & 544C>A & 545T>G & 546T>C & 548G>A & 549G>T & 550_551insT & 1211C>T & 1723G>A & 1865T>C & 2636C>T & 2794C>T & 2796T>C & 2799A>G & 2802G>A	80A>C & 89T>G & 90C>T & 93T>C	79A>G & 226A>G	80A>C & 89T>G & 90C>T & 93T>C & 1120T>C	None	None
GS84	S83L & D87Y	None	S80I & E62K	None	None	H2R	None	547A>C & 1174T>G & 1723G>A & 1730C>T & 1868_1869insC & 1872_1873insG & 2209G>C & 2215C>G	80A>C & 89T>G & 93T>C & 1136C>T	79A>G & 90T>C & 226A>G & 1136C>T	80A>C & 89T>G & 93T>C & 1002A>G & 1006C>G & 1010C>T & 1018_1019insA & 1021T>A & 1023delG & 1038T>C & 1120T>C & 1136C>T	None	None
GS85	S83L	None	E62K	None	None	H2R	None	356G>A & 357C>T & 1745G>A & 2797G>A & 2816C>T & 2818T>C & 2821A>G & 2824G>A	79G>A & 80A>C & 89T>G & 90C>T & 93T>C & 1136C>T	226A>G & 1136C>T	79G>A & 80A>C & 89T>G & 90C>T & 93T>C & 1002A>G & 1006C>G & 1010C>T & 1018_1019insA & 1021T>A & 1023delG & 1038T>C & 1120T>C & 1136C>T	None	None
GS86	S83L & D87N & D678E	None	S80I & E62K	S458A	None	None	F4Y	1211C>T & 1723G>A & 2132T>A & 2794C>T & 2796T>C & 2799A>G & 2802G>A	None	79A>G & 80C>A & 89G>T & 90T>C & 93C>T & 226A>G	1002A>G & 1006C>G & 1010C>T & 1018_1019insA & 1021T>A & 1023delG & 1038T>C & 1120T>C	None	None
GS93	S83L & D87N	E219K	A56T & S80I & E62K & A620V	None	None	None	None	1723G>A & 1868_1869insC & 1872_1873insG & 2794C>T & 2796T>C & 2799A>G & 2802G>A	None	79A>G & 80C>A & 89G>T & 90T>C & 93C>T & 226A>G	1002A>G & 1006C>G & 1010C>T & 1018_1019insA & 1021T>A & 1023delG & 1038T>C & 1120T>C	None	None
GS99	S83L & D87Y	None	S80I & E62K	None	None	H2R	None	547A>C & 1174T>G & 1723G>A & 1730C>T & 1868_1869insC & 1872_1873insG & 2209G>C & 2215C>G	1136C>T	79A>G & 80C>A & 89G>T & 90T>C & 93C>T & 226A>G & 1136C>T	1002A>G & 1006C>G & 1010C>T & 1018_1019insA & 1021T>A & 1023delG & 1038T>C & 1120T>C & 1136C>T	None	None
GX18	R371G	None	E62K	None	None	None	None	547A>C & 1171G>A & 1174T>G & 1175delA & 1178C>T & 1211C>T & 1220G>A & 1229C>T & 1723G>A & 1869_1870insG & 1870C>T & 1872_1873insC & 2794C>T & 2796T>C & 2799A>G & 2802G>A	79G>A & 80A>C & 89T>G & 90C>T & 93T>C	226A>G	79G>A & 80A>C & 89T>G & 90C>T & 93T>C & 1002A>G & 1006C>G & 1010C>T & 1018_1019insA & 1021T>A & 1023delG & 1038T>C & 1120T>C	None	None
GX29	None	V201I	E62K & R681H	None	None	D283G & Y358N	None	137T>A & 142A>T & 264C>G & 1723G>A & 2203T>G & 2794C>T & 2796T>C & 2799A>G & 2802G>A	250A>T & 253A>T & 273T>A	79A>G & 80C>A & 89G>T & 90T>C & 93C>T & 226A>G & 250A>T & 253A>T & 273T>A	250A>T & 253A>T & 273T>A & 1120T>C	None	None
GX37	D678E & D741E	None	E62K	None	None	None	None	542_543insA & 544C>A & 545T>G & 546T>C & 548G>A & 549G>T & 550_551insT & 1869_1870insG & 1870C>T & 1872_1873insC & 2132T>A & 2794C>T & 2796T>C & 2799A>G & 2802G>A	79G>A & 80A>C & 89T>G & 90C>T & 93T>C	226A>G	79G>A & 80A>C & 89T>G & 90C>T & 93T>C & 1002A>G & 1006C>G & 1010C>T & 1018_1019insA & 1021T>A & 1023delG & 1038T>C & 1120T>C	None	None
GX38	None	None	E62K	None	None	D283G & P294L & Y358N	None	137T>A & 142A>T & 356G>A & 542_543insA & 544C>A & 545T>G & 546T>C & 548G>A & 549G>T & 550_551insT & 1723G>A & 1865T>C & 2794C>T & 2796T>C & 2799A>G & 2802G>A	250A>T & 253A>T & 273T>A	79A>G & 80C>A & 89G>T & 90T>C & 93C>T & 226A>G & 250A>T & 253A>T & 273T>A	250A>T & 253A>T & 273T>A & 1120T>C	None	None
GZ10	D678E & D741E	None	E62K	None	None	None	E167K	83A>G & 137T>A & 142A>T & 846T>C & 1211C>T & 1220G>A & 1229C>T & 1723G>A & 1725T>C & 1726C>G & 1727C>A & 1730C>T & 1733G>T & 1734G>C & 1735A>G & 2132T>A & 2794C>T & 2796T>C & 2799A>G & 2802G>A	41G>A	41G>A & 79A>G & 80C>A & 89G>T & 90T>C & 93C>T & 226A>G	41G>A & 1120T>C	None	None
GZ12	None	None	E62K	None	G144S	D283G & Y358N	None	137T>A & 142A>T & 264C>G & 1174T>G & 1211C>T & 1723G>A & 1865T>C & 2132T>A & 2794C>T & 2796T>C & 2799A>G & 2802G>A	80A>C & 89T>G & 93T>C & 1002G>A & 1006G>C & 1010T>C & 1019delA & 1022A>T & 1023_1024insG & 1038C>T	79A>G & 90T>C & 226A>G & 1002G>A & 1006G>C & 1010T>C & 1019delA & 1022A>T & 1023_1024insG & 1038C>T	80A>C & 89T>G & 93T>C & 1120T>C	None	None
GZ16	None	None	E62K	None	None	D283G & Y358N	None	1723G>A & 2794C>T & 2796T>C & 2799A>G & 2802G>A	79G>A & 80A>C & 89T>G & 90C>T & 93T>C & 250A>T & 253A>T & 273T>A & 1002G>A & 1006G>C & 1010T>C & 1019delA & 1022A>T & 1023_1024insG & 1038C>T	226A>G & 250A>T & 253A>T & 273T>A & 1002G>A & 1006G>C & 1010T>C & 1019delA & 1022A>T & 1023_1024insG & 1038C>T	79G>A & 80A>C & 89T>G & 90C>T & 93T>C & 250A>T & 253A>T & 273T>A & 1120T>C	None	None
GZ18	None	H652R & E794D	E62K	None	None	D283G & Y358N	None	137T>A & 142A>T & 316C>T & 1723G>A & 1865T>C & 2794C>T & 2796T>C & 2799A>G & 2802G>A	76G>A & 80A>C & 89T>G & 250A>T & 253A>T & 273T>A	76G>A & 79A>G & 90T>C & 93C>T & 226A>G & 250A>T & 253A>T & 273T>A	76G>A & 80A>C & 89T>G & 250A>T & 253A>T & 273T>A & 1120T>C	None	None
GZ29	S83L	None	E62K	None	None	None	None	264C>G & 356G>A & 1174T>G & 1211C>T & 1723G>A & 1725T>C & 1726C>G & 1727C>A & 1730C>T & 1733G>T & 1734G>C & 1735A>G & 1869_1870insG & 1870C>T & 1872_1873insC & 2636C>T & 2794C>T & 2796T>C & 2799A>G & 2802G>A	250A>T & 253A>T & 273T>A	79A>G & 80C>A & 89G>T & 90T>C & 93C>T & 226A>G & 250A>T & 253A>T & 273T>A	250A>T & 253A>T & 273T>A & 1120T>C	None	None
GZ31	D678E & D741E	None	E62K	None	None	None	E167K	83A>G & 137T>A & 142A>T & 846T>C & 1211C>T & 1220G>A & 1229C>T & 1723G>A & 1725T>C & 1726C>G & 1727C>A & 1730C>T & 1733G>T & 1734G>C & 1735A>G & 2132T>A & 2794C>T & 2796T>C & 2799A>G & 2802G>A	41G>A	41G>A & 79A>G & 80C>A & 89G>T & 90T>C & 93C>T & 226A>G	41G>A & 1120T>C	None	None
GZ34	None	None	E62K	None	None	None	None	1723G>A & 2636C>T & 2794C>T & 2796T>C & 2799A>G & 2802G>A	None	79A>G & 80C>A & 89G>T & 90T>C & 93C>T & 226A>G	1120T>C	None	None
GZ40	None	None	E62K	None	None	D283G & Y358N	None	137T>A & 142A>T & 1211C>T & 1723G>A & 2794C>T & 2796T>C & 2799A>G & 2802G>A	250A>T & 253A>T & 273T>A & 1002G>A & 1006G>C & 1010T>C & 1019delA & 1022A>T & 1023_1024insG & 1038C>T	79A>G & 80C>A & 89G>T & 90T>C & 93C>T & 226A>G & 250A>T & 253A>T & 273T>A & 1002G>A & 1006G>C & 1010T>C & 1019delA & 1022A>T & 1023_1024insG & 1038C>T	250A>T & 253A>T & 273T>A & 1120T>C	None	None
GZ43	None	None	E62K	None	None	None	None	1174T>G	None	79A>G & 80C>A & 89G>T & 90T>C & 93C>T & 226A>G	1002A>G & 1006C>G & 1010C>T & 1018_1019insA & 1021T>A & 1023delG & 1038T>C & 1120T>C	None	R827H
GZ51	T611S & D678E	None	E62K	T392I	None	None	None	1211C>T & 1723G>A & 1725T>C & 1726C>G & 1727C>A & 1730C>T & 1733G>T & 1734G>C & 1735A>G & 1868_1869insC & 1872_1873insG & 2794C>T & 2796T>C & 2799A>G & 2802G>A	79G>A & 80A>C & 89T>G & 90C>T & 93T>C & 264C>T	226A>G & 264C>T	79G>A & 80A>C & 89T>G & 90C>T & 93T>C & 264C>T & 1002A>G & 1006C>G & 1010C>T & 1018_1019insA & 1021T>A & 1023delG & 1038T>C & 1120T>C	None	None
GZ55	S83L & D87N	None	S80I & E62K	None	None	P220S & D283G & Y358N	T62M	137T>A & 142A>T & 356G>A & 542_543insA & 544C>A & 545T>G & 546T>C & 548G>A & 549G>T & 550_551insT & 1723G>A & 2794C>T & 2796T>C & 2799A>G & 2802G>A	79G>A & 80A>C & 89T>G & 90C>T & 93T>C & 250A>T & 253A>T & 273T>A	226A>G & 250A>T & 253A>T & 273T>A	79G>A & 80A>C & 89T>G & 90C>T & 93T>C & 250A>T & 253A>T & 273T>A & 1002A>G & 1006C>G & 1010C>T & 1018_1019insA & 1021T>A & 1023delG & 1038T>C & 1120T>C	None	None
GZ64	S83L & D87N	V651I	S80I & E62K	None	None	H2R	None	1211C>T & 1221C>T & 1723G>A & 1730C>T & 1865T>C & 2132T>A & 2794C>T & 2796T>C & 2799A>G & 2802G>A	80A>C & 89T>G & 90C>T & 93T>C & 1002G>A & 1006G>C & 1010T>C & 1019delA & 1022A>T & 1023_1024insG & 1038C>T	79A>G & 226A>G & 1002G>A & 1006G>C & 1010T>C & 1019delA & 1022A>T & 1023_1024insG & 1038C>T	80A>C & 89T>G & 90C>T & 93T>C & 1120T>C	None	None
GZ86	None	None	E62K	None	None	D283G & Y358N	None	1150T>C & 1151C>T & 1367G>A & 2438C>T & 2440T>C & 2443A>G & 2446G>A	79G>A & 80A>C & 89T>G & 90C>T & 93T>C	226A>G	79G>A & 80A>C & 89T>G & 90C>T & 93T>C & 1120T>C	None	None
GZ89	None	E185D & E656D	None	A243S & D245E & I355S & A512T	None	None	None	264C>A & 356G>A & 541delA & 543G>T & 544_545insT & 548G>T & 550C>G & 552delT & 1211C>T & 1221C>T & 1723G>A & 1725T>C & 1726C>G & 1727C>A & 1730C>T & 1733G>T & 1734G>C & 1735A>G & 2163A>G & 2203T>A & 2205A>G & 2209G>C & 2211A>T & 2215C>G	79G>T & 80A>C & 89T>G & 90C>A & 93T>C	79A>T & 90T>A & 226A>G	79G>T & 80A>C & 89T>G & 90C>A & 93T>C & 1002A>G & 1006C>G & 1010C>T & 1018_1019insA & 1021T>A & 1023delG & 1038T>C & 1120T>C	None	E412D & T595I
GZ9	S83L	None	E62K	None	None	None	None	137T>A & 142A>T & 264C>G & 1174T>G & 1211C>T & 1723G>A & 1725T>C & 1726C>G & 1727C>A & 1730C>T & 1733G>T & 1734G>C & 1735A>G & 1869_1870insG & 1870C>T & 1872_1873insC	80A>C & 89T>G & 93T>C & 250A>T & 253A>T & 273T>A	79A>G & 90T>C & 226A>G & 250A>T & 253A>T & 273T>A	80A>C & 89T>G & 93T>C & 250A>T & 253A>T & 273T>A & 1120T>C	None	None
GZ98	S83L	H652R	E62K	None	None	T235P & D283G & Y358N	None	137T>A & 142A>T & 316C>T & 1723G>A & 1725T>C & 1726C>G & 1727C>A & 1730C>T & 1733G>T & 1734G>C & 1735A>G & 1865T>C & 2794C>T & 2796T>C & 2799A>G & 2802G>A	76G>A & 80A>C & 89T>G & 250A>T & 253A>T & 273T>A	76G>A & 79A>G & 90T>C & 93C>T & 226A>G & 250A>T & 253A>T & 273T>A	76G>A & 80A>C & 89T>G & 250A>T & 253A>T & 273T>A & 1120T>C	None	None
HB11	S83L	None	E62K & R406W	V152I	None	None	None	547A>C & 846T>C & 849A>G & 2132T>A	80A>C & 89T>G & 93T>C	79A>G & 90T>C & 226A>G	80A>C & 89T>G & 93T>C & 1120T>C	None	None
HB13	None	None	E62K	None	L47M & G144S	D283G & Y358N	None	137T>A & 142A>T & 1211C>T & 1723G>A & 1865T>C & 2132T>A	80A>C & 89T>G & 93T>C & 1002G>A & 1006G>C & 1010T>C & 1019delA & 1022A>T & 1023_1024insG & 1038C>T	79A>G & 90T>C & 226A>G & 1002G>A & 1006G>C & 1010T>C & 1019delA & 1022A>T & 1023_1024insG & 1038C>T	80A>C & 89T>G & 93T>C & 1120T>C	None	None
HB17	S83L	None	E62K & R406W	V152I	None	None	None	547A>C & 1211C>T & 2132T>A	80A>C & 89T>G & 93T>C	79A>G & 90T>C & 226A>G	80A>C & 89T>G & 93T>C & 1120T>C	None	None
HB22	T611S & D678E	None	E62K	None	None	H2R	None	1211C>T & 1723G>A & 1865T>C & 2132T>A & 2794C>T & 2796T>C & 2799A>G & 2802G>A	80A>C & 89T>G & 1002G>A & 1006G>C & 1010T>C & 1019delA & 1022A>T & 1023_1024insG & 1038C>T	79A>G & 90T>C & 93C>T & 226A>G & 1002G>A & 1006G>C & 1010T>C & 1019delA & 1022A>T & 1023_1024insG & 1038C>T	80A>C & 89T>G & 1120T>C	None	None
HB23	None	None	E62K	None	None	D283G & Y358N	None	1723G>A & 1865T>C & 2794C>T & 2796T>C & 2799A>G & 2802G>A	80A>C & 89T>G & 250A>T & 253A>T & 273T>A	79A>G & 90T>C & 93C>T & 226A>G & 250A>T & 253A>T & 273T>A	80A>C & 89T>G & 250A>T & 253A>T & 273T>A & 1120T>C	None	None
HB24	S83L & D87N & D678E & A863V	S492N & A618T	S80I & E62K & D475E	S458A & T172A	None	H2R & D283G	None	356G>A & 541delA & 543G>T & 547_548insA & 548G>T & 550C>G & 552delT & 1723G>A & 1870C>G & 1870_1871insT & 1872_1873insC & 2205A>G & 2209G>C & 2211A>T & 2213T>C & 2215C>G & 2794C>T	1002G>A & 1006G>C & 1010T>C & 1019delA & 1022A>T & 1023_1024insG & 1038C>T	79A>G & 80C>A & 89G>T & 90T>C & 93C>T & 226A>G & 1002G>A & 1006G>C & 1010T>C & 1019delA & 1022A>T & 1023_1024insG & 1038C>T	1120T>C	None	None
HB27	None	None	E62K	None	None	D283G & Y358N	None	137T>A & 142A>T & 1211C>T & 1723G>A & 1865T>C & 2132T>A & 2636C>T & 2794C>T & 2796T>C & 2799A>G & 2802G>A	250A>T & 253A>T & 273T>A & 1002G>A & 1006G>C & 1010T>C & 1019delA & 1022A>T & 1023_1024insG & 1038C>T	79A>G & 80C>A & 89G>T & 90T>C & 93C>T & 226A>G & 250A>T & 253A>T & 273T>A & 1002G>A & 1006G>C & 1010T>C & 1019delA & 1022A>T & 1023_1024insG & 1038C>T	250A>T & 253A>T & 273T>A & 1120T>C	None	None
HB28	None	H652R	E62K	None	None	D283G & Y358N	None	137T>A & 142A>T & 1723G>A & 1865T>C & 2794C>T & 2796T>C & 2799A>G & 2802G>A	80A>C & 89T>G & 93T>C	79A>G & 90T>C & 226A>G	80A>C & 89T>G & 93T>C & 1120T>C	None	None
HB29	S83L	None	E62K	I464F	None	None	None	858T>G & 1407G>A & 1552_1553insC & 1556_1557insG	None	79A>G & 80C>A & 89G>T & 90T>C & 93C>T & 226A>G	1002A>G & 1006C>G & 1010C>T & 1018_1019insA & 1021T>A & 1023delG & 1038T>C & 1120T>C	None	None
HB3	None	None	E62K	None	None	D283G & Y358N	None	137T>A & 142A>T & 356G>A & 542_543insA & 544C>A & 545T>G & 546T>C & 548G>A & 549G>T & 550_551insT & 1723G>A & 1865T>C & 2794C>T & 2796T>C & 2799A>G & 2802G>A	79G>A & 80A>C & 89T>G & 90C>T & 93T>C & 250A>T & 253A>T & 273T>A	226A>G & 250A>T & 253A>T & 273T>A	79G>A & 80A>C & 89T>G & 90C>T & 93T>C & 250A>T & 253A>T & 273T>A & 1002A>G & 1006C>G & 1010C>T & 1018_1019insA & 1021T>A & 1023delG & 1038T>C & 1120T>C	None	None
HB30	T611S & D678E	None	E62K	None	None	H2R	None	1211C>T & 1723G>A & 1865T>C & 2132T>A & 2794C>T & 2796T>C & 2799A>G & 2802G>A	80A>C & 89T>G & 1002G>A & 1006G>C & 1010T>C & 1019delA & 1022A>T & 1023_1024insG & 1038C>T	79A>G & 90T>C & 93C>T & 226A>G & 1002G>A & 1006G>C & 1010T>C & 1019delA & 1022A>T & 1023_1024insG & 1038C>T	80A>C & 89T>G & 1120T>C	None	None
HB33	None	None	E62K	None	None	D283G & Y358N	None	137T>A & 142A>T & 1211C>T & 1723G>A & 1865T>C & 2132T>A & 2794C>T & 2796T>C & 2799A>G & 2802G>A	250A>T & 253A>T & 273T>A & 1002G>A & 1006G>C & 1010T>C & 1019delA & 1022A>T & 1023_1024insG & 1038C>T	79A>G & 80C>A & 89G>T & 90T>C & 93C>T & 226A>G & 250A>T & 253A>T & 273T>A & 1002G>A & 1006G>C & 1010T>C & 1019delA & 1022A>T & 1023_1024insG & 1038C>T	250A>T & 253A>T & 273T>A & 1120T>C	None	None
HB36	S83L	None	E62K	None	None	None	None	1723G>A & 2794C>T & 2796T>C & 2799A>G & 2802G>A	1036A>G	79A>G & 80C>A & 89G>T & 90T>C & 93C>T & 226A>G & 1036A>G	1002A>G & 1006C>G & 1010C>T & 1018_1019insA & 1021T>A & 1023delG & 1036A>G & 1038T>C & 1120T>C	None	L998V
HB37	S83L	None	E62K	I464F	None	None	None	858T>G & 1407G>A & 1552_1553insC & 1556_1557insG	None	79A>G & 80C>A & 89G>T & 90T>C & 93C>T & 226A>G	1002A>G & 1006C>G & 1010C>T & 1018_1019insA & 1021T>A & 1023delG & 1038T>C & 1120T>C	None	None
HB38	D87Y	None	E62K	None	None	D283G & Y358N	None	137T>A & 142A>T & 542_543insA & 544C>A & 545T>G & 546T>C & 548G>A & 549G>T & 550_551insT & 1211C>T & 1220G>A & 1229C>T & 1723G>A	None	79A>G & 80C>A & 89G>T & 90T>C & 93C>T & 226A>G	1120T>C	None	None
HB4	T611S & D678E	None	E62K	None	None	H2R	None	1211C>T & 1723G>A & 1865T>C & 2132T>A & 2794C>T & 2796T>C & 2799A>G & 2802G>A	80A>C & 89T>G & 1002G>A & 1006G>C & 1010T>C & 1019delA & 1022A>T & 1023_1024insG & 1038C>T	79A>G & 90T>C & 93C>T & 226A>G & 1002G>A & 1006G>C & 1010T>C & 1019delA & 1022A>T & 1023_1024insG & 1038C>T	80A>C & 89T>G & 1120T>C	None	None
HB42	None	None	E62K	None	None	D283G & Y358N	None	137T>A & 142A>T & 356G>A & 542_543insA & 544C>A & 545T>G & 546T>C & 548G>A & 549G>T & 550_551insT & 1723G>A & 1865T>C & 2794C>T & 2796T>C & 2799A>G & 2802G>A	None	79A>G & 80C>A & 89G>T & 90T>C & 93C>T & 226A>G	1002A>G & 1006C>G & 1010C>T & 1018_1019insA & 1021T>A & 1023delG & 1038T>C & 1120T>C	None	None
HB44	None	None	E62K	None	None	D283G & Y358N	None	137T>A & 142A>T & 264C>G & 1174T>G & 1723G>A & 2794C>T & 2796T>C & 2799A>G & 2802G>A	250A>T & 253A>T & 273T>A	79A>G & 80C>A & 89G>T & 90T>C & 93C>T & 226A>G & 250A>T & 253A>T & 273T>A	250A>T & 253A>T & 273T>A & 1002A>G & 1006C>G & 1010C>T & 1018_1019insA & 1021T>A & 1023delG & 1038T>C & 1120T>C	None	None
HB45	None	None	E62K	R378C	None	None	A271V	356G>A & 357C>T & 547A>C & 846T>C & 1171G>A & 1173delT & 1178C>T & 1211C>T & 1723G>A & 1865T>C	79G>A & 80A>C & 89T>G & 90C>T & 93T>C	226A>G	79G>A & 80A>C & 89T>G & 90C>T & 93T>C & 1002A>G & 1006C>G & 1010C>T & 1018_1019insA & 1021T>A & 1023delG & 1038T>C & 1120T>C	None	None
HB50	S83L	None	E62K	None	None	None	None	1723G>A & 2203T>G & 2211A>G	None	79A>G & 80C>A & 89G>T & 90T>C & 93C>T & 226A>G	1002A>G & 1006C>G & 1010C>T & 1018_1019insA & 1021T>A & 1023delG & 1038T>C & 1120T>C	None	None
HB53	None	None	E62K	None	None	None	None	846T>C & 1232G>A & 1723G>A & 1868_1869insC & 1872_1873insG	None	79A>G & 80C>A & 89G>T & 90T>C & 93C>T & 226A>G	1002A>G & 1006C>G & 1010C>T & 1018_1019insA & 1021T>A & 1023delG & 1038T>C & 1120T>C	None	None
HB55	S83L & D87N	None	S80I & E62K	None	None	D283G & Y358N	None	137T>A & 142A>T & 542_543insA & 544C>A & 545T>G & 546T>C & 548G>A & 549G>T & 550_551insT & 1211C>T & 1231C>T & 1240G>A & 1249C>T & 1743G>A	76G>A	76G>A & 79A>G & 80C>A & 89G>T & 90T>C & 93C>T & 226A>G	76G>A & 1120T>C	None	None
HB6	S83L & D87G	None	S80I & E62K	None	None	D283G & Y358N	None	285G>A & 541A>T & 1723G>A & 2794C>T & 2796T>C & 2799A>G & 2802G>A & 2844G>A	80A>C & 89T>G & 250A>T & 253A>T & 273T>A	79A>G & 90T>C & 93C>T & 226A>G & 250A>T & 253A>T & 273T>A	80A>C & 89T>G & 250A>T & 253A>T & 273T>A & 1002A>G & 1006C>G & 1010C>T & 1018_1019insA & 1021T>A & 1023delG & 1038T>C & 1120T>C	None	None
HB61	None	None	E62K	None	None	None	None	356G>A & 1174T>G & 1723G>A	79G>A & 80A>C & 89T>G & 90C>T & 93T>C	226A>G	79G>A & 80A>C & 89T>G & 90C>T & 93T>C & 1002A>G & 1006C>G & 1010C>T & 1018_1019insA & 1021T>A & 1023delG & 1038T>C & 1120T>C	None	None
HB64	None	None	E62K	None	None	H2R	None	1211C>T & 1723G>A & 2132T>A	None	79A>G & 80C>A & 89G>T & 90T>C & 93C>T & 226A>G	1002A>G & 1006C>G & 1010C>T & 1018_1019insA & 1021T>A & 1023delG & 1038T>C & 1120T>C	None	L129I
HB84	None	None	E62K	None	None	None	None	1723G>A & 1725T>C & 1726C>G & 1727C>A & 1730C>T & 1733G>T & 1734G>C & 1735A>G	80A>C & 89T>G & 93T>C	79A>G & 90T>C & 226A>G	80A>C & 89T>G & 93T>C & 1120T>C	None	None
HLJ34	None	None	E62K	None	None	Y358N	G231V	994C>T & 1367G>A & 1509T>C & 1855A>G & 2438C>T & 2440T>C & 2443A>G & 2446G>A	10A>G & 1002G>A & 1006G>C & 1010T>C & 1019delA & 1022A>T & 1023_1024insG & 1038C>T	10A>G & 79A>G & 80C>A & 89G>T & 90T>C & 93C>T & 226A>G & 1002G>A & 1006G>C & 1010T>C & 1019delA & 1022A>T & 1023_1024insG & 1038C>T	10A>G & 1120T>C	None	None
HLJ5	None	None	E62K	None	None	H2R	None	137T>A & 142A>T & 1211C>T & 1723G>A & 1730C>T & 1865T>C & 2132T>G & 2794C>T & 2796T>C & 2799A>G & 2802G>A	80A>C & 89T>G	79A>G & 90T>C & 93C>T & 226A>G	80A>C & 89T>G & 1002A>G & 1006C>G & 1010C>T & 1018_1019insA & 1021T>A & 1023delG & 1038T>C & 1120T>C	None	None
HLJ64	S83L & D87N	E219K	A56T & S80I & E62K & A620V	None	None	None	None	1723G>A & 2794C>T & 2796T>C & 2799A>G & 2802G>A	None	79A>G & 80C>A & 89G>T & 90T>C & 93C>T & 226A>G	1002A>G & 1006C>G & 1010C>T & 1018_1019insA & 1021T>A & 1023delG & 1038T>C & 1120T>C	None	None
HN15	S83L & D87N	None	S80I & E62K	S458A	G144S	D283G & Y358N	None	137T>A & 142A>T & 1211C>T & 1723G>A & 1865T>C & 2794C>T & 2796T>C & 2799A>G & 2802G>A	None	79A>G & 80C>A & 89G>T & 90T>C & 93C>T & 226A>G	1120T>C	None	None
HUBJ12	S83L & D678E	S492N	E62K & M241I & D475E	None	None	H2R & D283G & A360V	None	264C>G & 356G>A & 1211C>T & 1220G>A & 1229C>T & 1723G>A & 1725T>C & 1726C>G & 1727C>A & 1730C>T & 1733G>T & 1734G>C & 1735A>G & 1870C>G & 1870_1871insT & 1872_1873insC & 2205A>G & 2209G>C & 2211A>G & 2215C>G & 2793C>G & 2794C>A & 2802G>T & 2803G>C	79G>A & 80A>C & 89T>G & 90C>T & 93T>C & 1002G>A & 1006G>C & 1007T>C & 1010T>G & 1011C>T & 1018G>A & 1019A>C & 1022A>G & 1023T>G & 1038C>T	226A>G & 1002G>A & 1006G>C & 1007T>C & 1010T>G & 1011C>T & 1018G>A & 1019A>C & 1022A>G & 1023T>G & 1038C>T	79G>A & 80A>C & 89T>G & 90C>T & 93T>C & 1007T>C & 1010C>G & 1011C>T & 1017_1018insA & 1018G>C & 1021delT & 1022T>G & 1120T>C	R24*	None
HUBJ16	S83L & D87N	None	S80I & E62K & L440R	S458T	A64T	None	None	285G>A & 1171G>A & 1173delT & 1178C>T & 1211C>T & 1723G>A & 2794C>T & 2796T>C & 2799A>G & 2802G>A	79G>A & 80A>C & 89T>G & 90C>T & 93T>C	226A>G	79G>A & 80A>C & 89T>G & 90C>T & 93T>C & 1002A>G & 1006C>G & 1010C>T & 1018_1019insA & 1021T>A & 1023delG & 1038T>C & 1120T>C	None	None
HUBJ20	S83L & D87N	None	S80I & E62K & L440R	S458T	A64T	None	None	1171G>A & 1173delT & 1178C>T & 1211C>T & 1723G>A & 2794C>T & 2796T>C & 2799A>G & 2802G>A	79G>A & 80A>C & 89T>G & 90C>T & 93T>C	226A>G	79G>A & 80A>C & 89T>G & 90C>T & 93T>C & 1002A>G & 1006C>G & 1010C>T & 1018_1019insA & 1021T>A & 1023delG & 1038T>C & 1120T>C	None	None
HUBJ22	S83L & T611S & D678E	None	E62K	None	None	H2R	None	1211C>T & 1723G>A & 1869_1870insG & 1870C>T & 1872_1873insC & 2132T>A & 2794C>T & 2796T>C & 2799A>G & 2802G>A	80A>C & 89T>G & 93T>C & 1002G>A & 1006G>C & 1010T>C & 1019delA & 1022A>T & 1023_1024insG & 1038C>T	79A>G & 90T>C & 226A>G & 1002G>A & 1006G>C & 1010T>C & 1019delA & 1022A>T & 1023_1024insG & 1038C>T	80A>C & 89T>G & 93T>C & 1120T>C	None	None
HUBJ24	S83L & D87N	None	S80I & E62K & L440R	S458T	A64T	None	None	1171G>A & 1173delT & 1178C>T & 1211C>T & 1723G>A & 2132T>A & 2794C>T & 2796T>C & 2799A>G & 2802G>A	None	79A>G & 80C>A & 89G>T & 90T>C & 93C>T & 226A>G	1002A>G & 1006C>G & 1010C>T & 1018_1019insA & 1021T>A & 1023delG & 1038T>C & 1120T>C	None	None
HUBJ25	S83L & D678E	None	E62K	V136I	None	H2R	None	2479C>T	250A>T	79A>G & 80C>A & 89G>T & 90T>C & 93C>T & 226A>G & 250A>T	250A>T & 1120T>C	None	None
HUBJ28	S83L	None	E62K & R406W	None	None	None	None	1323C>G & 1323_1324insT & 1325_1326insC & 2247C>T & 2249T>C & 2252A>G & 2255G>A	None	79A>G & 80C>A & 89G>T & 90T>C & 93C>T & 226A>G	1120T>C	None	None
HUBJ30	S83L & D678E	None	E62K	V136I	None	H2R	None	2438C>T	250A>T	79A>G & 80C>A & 89G>T & 90T>C & 93C>T & 226A>G & 250A>T	250A>T & 1120T>C	None	None
HUBJ8	S83L	H652R	E62K & L206M	E545D	None	D283G & Y358N	None	137T>A & 142A>T & 1723G>A & 1865T>C & 2203T>G	80A>C & 89T>G & 250A>T & 253A>T & 273T>A & 1002G>A & 1006G>C & 1010T>C & 1019delA & 1022A>T & 1023_1024insG & 1038C>T	79A>G & 90T>C & 93C>T & 226A>G & 250A>T & 253A>T & 273T>A & 1002G>A & 1006G>C & 1010T>C & 1019delA & 1022A>T & 1023_1024insG & 1038C>T	80A>C & 89T>G & 250A>T & 253A>T & 273T>A & 1120T>C	None	None
HUBS21	S83L & D87N	None	S80I & E84G & E62K	None	G144S	D283G & Y358N	None	137T>A & 142A>T & 1174T>G & 2794C>T & 2796T>C & 2799A>G & 2802G>A	79G>A & 80A>C & 89T>G & 90C>T & 93T>C	226A>G	79G>A & 80A>C & 89T>G & 90C>T & 93T>C & 1120T>C	None	None
HUBS24	S83L & R234C & A291V	E708K & R713H	S80I & E62K	V128I	None	D283G & Y358N	None	137T>A & 142A>T & 356G>A & 357C>T & 1174T>G & 1723G>A & 1725T>C & 1726C>G & 1727C>A & 1730C>T & 1733G>T & 1734G>C & 1735A>G & 1865T>C & 2794C>T & 2796T>C & 2799A>G & 2802G>A	80A>C & 89T>G & 250A>T & 253A>T & 273T>A	79A>G & 90T>C & 93C>T & 226A>G & 250A>T & 253A>T & 273T>A	80A>C & 89T>G & 250A>T & 253A>T & 273T>A & 1002A>G & 1006C>G & 1010C>T & 1018_1019insA & 1021T>A & 1023delG & 1038T>C & 1120T>C	None	R1156C
HUBS28	S83L & D87N	E219K	A56T & S80I & E62K & A620V	None	None	None	None	1723G>A & 2132T>A & 2794C>T & 2796T>C & 2799A>G & 2802G>A	None	79A>G & 80C>A & 89G>T & 90T>C & 93C>T & 226A>G	1002A>G & 1006C>G & 1010C>T & 1018_1019insA & 1021T>A & 1023delG & 1038T>C & 1120T>C	None	None
HUBS36	None	S492N & A618T	E62K & D475E & T718I	None	None	D283G & Y358N	None	1723G>A & 1869_1870insG & 1870C>T & 1872_1873insC & 2163A>G & 2205A>G & 2209G>C & 2211A>G & 2215C>G & 2794C>T & 2796T>C & 2799A>G & 2802G>A	None	79A>G & 80C>A & 89G>T & 90T>C & 93C>T & 226A>G	1120T>C	None	None
HUBS37	None	S492N & A618T	E62K & D475E & T718I	None	None	D283G & Y358N	None	None	None	79A>G & 80C>A & 89G>T & 90T>C & 93C>T & 226A>G	1120T>C	None	None
HUBS5	S83L & D87Y & A863V	S492N & A618T	S80I & E62K	S458A	None	H2R & D283G	None	277delA & 279G>T & 282_283insA & 284G>T & 286C>G & 288delT & 907G>A & 909delT & 914C>T & 947C>T & 956G>A & 965C>T & 1242T>C & 1243C>T & 1605_1606insG & 1606C>T & 1608_1609insC & 1899A>G & 1941A>G & 1945G>C & 1947A>G & 1951C>G & 2530C>T & 2532T>C & 2535A>G & 2538G>A	80A>C & 89T>G	79A>G & 90T>C & 93C>T & 226A>G	80A>C & 89T>G & 1120T>C	R24*	None
HUN101	None	H652R	E62K	None	None	D283G & Y358N	None	137T>A & 142A>T & 316C>T & 542_543insA & 544C>A & 545T>G & 546T>C & 548G>A & 549G>T & 550_551insT & 1723G>A & 2794C>T & 2796T>C & 2799A>G & 2802G>A	80A>C & 89T>G & 250A>T & 253A>T & 273T>A	79A>G & 90T>C & 93C>T & 226A>G & 250A>T & 253A>T & 273T>A	80A>C & 89T>G & 250A>T & 253A>T & 273T>A & 1002A>G & 1006C>G & 1010C>T & 1018_1019insA & 1021T>A & 1023delG & 1038T>C & 1120T>C	None	None
HUN103	None	H652R	E62K	None	None	D283G & Y358N	None	137T>A & 142A>T & 316C>T & 1723G>A & 1725T>C & 1726C>G & 1727C>A & 1730C>T & 1733G>T & 1734G>C & 1735A>G & 2794C>T & 2796T>C & 2799A>G & 2802G>A	76G>A & 80A>C & 89T>G & 250A>T & 253A>T & 273T>A	76G>A & 79A>G & 90T>C & 93C>T & 226A>G & 250A>T & 253A>T & 273T>A	76G>A & 80A>C & 89T>G & 250A>T & 253A>T & 273T>A & 1120T>C	None	None
HUN105	S83L & D87N	None	S80I & E62K	None	None	H2R	None	1211C>T & 1221C>T & 1723G>A & 1730C>T & 1865T>C & 2132T>A & 2794C>T & 2796T>C & 2799A>G & 2802G>A	80A>C & 89T>G & 90C>T & 93T>C & 1002G>A & 1006G>C & 1010T>C & 1019delA & 1022A>T & 1023_1024insG & 1038C>T	79A>G & 226A>G & 1002G>A & 1006G>C & 1010T>C & 1019delA & 1022A>T & 1023_1024insG & 1038C>T	80A>C & 89T>G & 90C>T & 93T>C & 1120T>C	None	None
HUN107	D678E	E703D	S80I & E62K & D475E	None	None	H2R & S138N & D283G	None	137T>A & 142A>T & 1220G>A & 1229C>T & 2205A>G & 2209G>C & 2215C>G & 2794C>T & 2796T>C & 2797T>C & 2799A>G & 2802G>A	None	79A>G & 80C>A & 89G>T & 90T>C & 93C>T & 226A>G	1002A>G & 1006C>G & 1010C>T & 1018_1019insA & 1021T>A & 1023delG & 1038T>C & 1120T>C	R24*	None
HUN108	S83L & D87N	None	S80I & E62K	None	None	P220S & D283G & Y358N	None	137T>A & 142A>T & 356G>A & 542_543insA & 544C>A & 545T>G & 546T>C & 548G>A & 549G>T & 550_551insT & 1743G>A & 2814C>T & 2816T>C & 2819A>G & 2822G>A	None	79A>G & 80C>A & 89G>T & 90T>C & 93C>T & 226A>G	1002A>G & 1006C>G & 1010C>T & 1018_1019insA & 1021T>A & 1023delG & 1038T>C & 1120T>C	None	None
HUN109	None	None	E62K	None	None	D283G & Y358N	K279*	264C>G & 1211C>T & 1723G>A & 1865T>C & 2794C>T & 2796T>C & 2799A>G & 2802G>A	79G>A & 80A>C & 89T>G & 90C>T & 93T>C & 1002G>A & 1006G>C & 1010T>C & 1019delA & 1022A>T & 1023_1024insG & 1038C>T	226A>G & 1002G>A & 1006G>C & 1010T>C & 1019delA & 1022A>T & 1023_1024insG & 1038C>T	79G>A & 80A>C & 89T>G & 90C>T & 93T>C & 1120T>C	None	None
HUN11	H211Y & D678E	None	E62K	None	None	H2R & V351I	None	356G>A & 357C>T & 540_541insC & 541A>T & 543G>T & 544C>T & 548G>T & 550C>G & 552delT & 1171G>A & 1173delT & 1178C>T & 1211C>T & 1723G>A & 1865T>C & 2132T>A & 2203T>G & 2211A>G	1002G>A & 1006G>C & 1010T>C & 1019delA & 1022A>T & 1023_1024insG & 1038C>T	79A>G & 80C>A & 89G>T & 90T>C & 93C>T & 226A>G & 1002G>A & 1006G>C & 1010T>C & 1019delA & 1022A>T & 1023_1024insG & 1038C>T	1120T>C	None	None
HUN111	S83L & D678E	None	E62K	V136I	None	H2R	None	2438C>T	250A>T	79A>G & 80C>A & 89G>T & 90T>C & 93C>T & 226A>G & 250A>T	250A>T & 1120T>C	None	None
HUN112	None	None	A56T & E62K & A620V	None	E126K	D283G & Y358N	None	1743G>A & 1889_1890insG & 1890C>T & 1892_1893insC & 2656C>T & 2814C>T & 2816T>C & 2819A>G	79G>T & 80A>C & 89T>G & 90C>A & 93T>C	79A>T & 90T>A & 226A>G	79G>T & 80A>C & 89T>G & 90C>A & 93T>C & 1120T>C	None	None
HUN113	None	None	E62K	None	None	H2R	None	1865T>C & 2794C>T & 2796T>C & 2799A>G & 2802G>A	80A>C & 89T>G & 93T>C & 183C>T & 250A>T & 253A>T & 273T>A	79A>G & 90T>C & 183C>T & 226A>G & 250A>T & 253A>T & 273T>A	80A>C & 89T>G & 93T>C & 183C>T & 250A>T & 253A>T & 273T>A & 1002A>G & 1006C>G & 1010C>T & 1018_1019insA & 1021T>A & 1023delG & 1038T>C & 1120T>C	None	None
HUN115	S83L	None	S80R & E62K	None	None	None	None	1174T>G & 1211C>T & 1865T>C & 2211A>G	79G>A & 80A>C & 89T>G & 90C>T & 93T>C	226A>G	79G>A & 80A>C & 89T>G & 90C>T & 93T>C & 1002A>G & 1006C>G & 1010C>T & 1018_1019insA & 1021T>A & 1023delG & 1038T>C & 1120T>C	None	K1178T
HUN127	D87Y	None	E62K	None	None	D283G & Y358N	None	137T>A & 142A>T & 356G>A & 542_543insA & 544C>A & 545T>G & 546T>C & 548G>A & 549G>T & 550_551insT & 1723G>A & 1725T>C & 1726C>G & 1727C>A & 1730C>T & 1733G>T & 1734G>C & 1735A>G & 2794C>T & 2796T>C & 2799A>G & 2802G>A	None	79A>G & 80C>A & 89G>T & 90T>C & 93C>T & 226A>G	1002A>G & 1006C>G & 1010C>T & 1018_1019insA & 1021T>A & 1023delG & 1038T>C & 1120T>C	None	None
HUN128	S83L	None	E62K	None	None	H2R	None	285G>A & 356G>A & 357C>T & 550C>T & 1171G>A & 1173delT & 1175A>G & 1178C>T & 1211C>T & 1220G>A & 1229C>T & 1723G>A & 1725T>C & 1726C>G & 1727C>A & 1730C>T & 1733G>T & 1734G>C & 1735A>G & 1865T>C & 2794C>T & 2796T>C & 2799A>G & 2802G>A	None	79A>G & 80C>A & 89G>T & 90T>C & 93C>T & 226A>G	1002A>G & 1006C>G & 1010C>T & 1018_1019insA & 1021T>A & 1023delG & 1038T>C & 1120T>C	None	None
HUN129	S83L & D87N	None	S80I & E62K	None	None	P220S & D283G & Y358N	None	137T>A & 142A>T & 356G>A & 542_543insA & 544C>A & 545T>G & 546T>C & 548G>A & 549G>T & 550_551insT & 1723G>A & 1865T>C & 2794C>T & 2796T>C & 2799A>G & 2802G>A	80A>C & 89T>G & 93T>C	79A>G & 90T>C & 226A>G	80A>C & 89T>G & 93T>C & 1002A>G & 1006C>G & 1010C>T & 1018_1019insA & 1021T>A & 1023delG & 1038T>C & 1120T>C	None	None
HUN13	None	None	E62K	None	None	None	None	264C>G & 1211C>T & 1723G>A & 1868_1869insC & 1872_1873insG & 2794C>T & 2796T>C & 2799A>G & 2802G>A	80A>C & 89T>G & 93T>C	79A>G & 90T>C & 226A>G	80A>C & 89T>G & 93T>C & 1002A>G & 1006C>G & 1010C>T & 1018_1019insA & 1021T>A & 1023delG & 1038T>C & 1120T>C	None	E226D
HUN14	None	None	E62K	None	None	None	None	None	80A>C & 89T>G & 93T>C	79A>G & 90T>C & 226A>G	80A>C & 89T>G & 93T>C & 1002A>G & 1006C>G & 1010C>T & 1018_1019insA & 1021T>A & 1023delG & 1038T>C & 1120T>C	None	None
HUN15	S83L	None	E62K	None	None	H2R	None	1174T>G & 1211C>T & 1723G>A & 1868_1869insC & 1872_1873insG & 2794C>T & 2796T>C & 2799A>G & 2802G>A	183C>T & 250A>T & 253A>T & 273T>A	79A>G & 80C>A & 89G>T & 90T>C & 93C>T & 183C>T & 226A>G & 250A>T & 253A>T & 273T>A	183C>T & 250A>T & 253A>T & 273T>A & 1120T>C	None	None
HUN16	None	None	E62K	None	None	H2R	None	137T>A & 142A>T & 1211C>T & 1723G>A & 1730C>T & 1865T>C & 2132T>G & 2794C>T & 2796T>C & 2799A>G & 2802G>A	80A>C & 89T>G	79A>G & 90T>C & 93C>T & 226A>G	80A>C & 89T>G & 1002A>G & 1006C>G & 1010C>T & 1018_1019insA & 1021T>A & 1023delG & 1038T>C & 1120T>C	None	None
HUN18	S83L	E185D & A618T & E703D	E62K & N385D & P401S	None	None	H2R & T246I & D282N & D283G	None	137T>A & 142A>T & 356G>A & 547A>C & 1171G>A & 1173delT & 1178C>T & 1211C>T & 1229C>T & 1723G>A & 1730C>T & 1870C>G & 1870_1871insT & 1872_1873insC & 2205A>G & 2209G>C & 2211A>G & 2215C>G	80A>C & 89T>G	79A>G & 90T>C & 93C>T & 226A>G	80A>C & 89T>G & 1002A>G & 1006C>G & 1010C>T & 1018_1019insA & 1021T>A & 1023delG & 1038T>C & 1120T>C	V13F & R24*	None
HUN19	S83L & D87N & D678E & A863V	S492N & A618T	S80I & E62K & D475E	S458A & T172A	None	H2R & D283G	None	356G>A & 541delA & 543G>T & 546_547insA & 548G>T & 550C>G & 552delT & 1172C>T & 1211C>T & 1220G>A & 1229C>T & 1483G>A & 1723G>A & 1869_1870insG & 1870C>T & 1872_1873insC & 2794C>T	1002G>A & 1006G>C & 1010T>C & 1019delA & 1022A>T & 1023_1024insG & 1038C>T	79A>G & 80C>A & 89G>T & 90T>C & 93C>T & 226A>G & 1002G>A & 1006G>C & 1010T>C & 1019delA & 1022A>T & 1023_1024insG & 1038C>T	1120T>C	None	None
HUN20	S83L	None	E62K	None	None	D283G & Y358N	None	137T>A & 142A>T & 356G>A & 542_543insA & 544C>A & 545T>G & 546T>C & 548G>A & 549G>T & 550_551insT & 1743G>A & 2814C>T & 2816T>C & 2819A>G & 2822G>A	79G>A & 80A>C & 89T>G & 90C>T & 93T>C & 250A>T & 253A>T & 273T>A	226A>G & 250A>T & 253A>T & 273T>A	79G>A & 80A>C & 89T>G & 90C>T & 93T>C & 250A>T & 253A>T & 273T>A & 1002A>G & 1006C>G & 1010C>T & 1018_1019insA & 1021T>A & 1023delG & 1038T>C & 1120T>C	None	None
HUN23	S83L	None	E62K	None	None	None	None	1723G>A & 2132T>A & 2794C>T & 2796T>C & 2799A>G & 2802G>A	79G>A & 80A>C & 89T>G & 90C>T & 93T>C	226A>G	79G>A & 80A>C & 89T>G & 90C>T & 93T>C & 1002A>G & 1006C>G & 1010C>T & 1018_1019insA & 1021T>A & 1023delG & 1038T>C & 1120T>C	None	None
HUN24	None	R628H	E62K	None	None	D283G & Y358N	None	137T>A & 142A>T & 542_543insA & 544C>A & 545T>G & 546T>C & 548G>A & 549G>T & 550_551insT & 1174T>G & 1723G>A & 1725T>C & 1726C>G & 1727C>A & 1730C>T & 1733G>T & 1734G>C & 1735A>G & 1865T>C & 2211A>G & 2636C>T & 2794C>T & 2796T>C & 2799A>G & 2802G>A	79G>A & 80A>C & 89T>G & 90C>T & 93T>C & 250A>T & 253A>T & 273T>A & 1002G>A & 1006G>C & 1010T>C & 1019delA & 1022A>T & 1023_1024insG & 1038C>T	226A>G & 250A>T & 253A>T & 273T>A & 1002G>A & 1006G>C & 1010T>C & 1019delA & 1022A>T & 1023_1024insG & 1038C>T	79G>A & 80A>C & 89T>G & 90C>T & 93T>C & 250A>T & 253A>T & 273T>A & 1120T>C	None	None
HUN26	S83L & D87Y	None	S80I & E62K	None	None	D283G & Y358N	None	137T>A & 142A>T & 356G>A & 542_543insA & 544C>A & 545T>G & 546T>C & 548G>A & 549G>T & 550_551insT & 1723G>A & 2794C>T & 2796T>C & 2799A>G & 2802G>A	None	79A>G & 80C>A & 89G>T & 90T>C & 93C>T & 226A>G	1002A>G & 1006C>G & 1010C>T & 1018_1019insA & 1021T>A & 1023delG & 1038T>C & 1120T>C	None	None
HUN27	S83L & D87N	None	S80I & E62K & G473A	None	None	D283G & Y358N	None	137T>A & 142A>T & 1723G>A & 1865T>C & 2794C>T & 2796T>C & 2799A>G & 2802G>A	80A>C & 89T>G & 93T>C & 1002G>A & 1006G>C & 1010T>C & 1019delA & 1022A>T & 1023_1024insG & 1038C>T	79A>G & 90T>C & 226A>G & 1002G>A & 1006G>C & 1010T>C & 1019delA & 1022A>T & 1023_1024insG & 1038C>T	80A>C & 89T>G & 93T>C & 1120T>C	None	None
HUN29	S83L & D87N	None	S80I & E62K & G473A	None	None	D283G & Y358N	None	137T>A & 142A>T & 1723G>A & 1865T>C & 2794C>T & 2796T>C & 2799A>G & 2802G>A	80A>C & 89T>G	79A>G & 90T>C & 93C>T & 226A>G	80A>C & 89T>G & 1120T>C	None	None
HUN38	None	None	E62K	None	None	V211L	None	1723G>A & 1868_1869insC & 1872_1873insG	None	79A>G & 80C>A & 89G>T & 90T>C & 93C>T & 226A>G	1002A>G & 1006C>G & 1010C>T & 1018_1019insA & 1021T>A & 1023delG & 1038T>C & 1120T>C	None	None
HUN39	None	None	E62K	None	None	D283G & Y358N	None	316C>T & 356G>A & 1723G>A & 1865T>C & 2794C>T & 2796T>C & 2799A>G & 2802G>A	80A>C & 89T>G & 250A>T & 253A>T & 273T>A	79A>G & 90T>C & 93C>T & 226A>G & 250A>T & 253A>T & 273T>A	80A>C & 89T>G & 250A>T & 253A>T & 273T>A & 1120T>C	None	None
HUN4	None	None	E62K	None	None	D283G & Y358N	None	137T>A & 142A>T & 1723G>A & 1865T>C & 2794C>T & 2796T>C & 2799A>G & 2802G>A	None	79A>G & 80C>A & 89G>T & 90T>C & 93C>T & 226A>G	1120T>C	None	None
HUN45	None	None	E62K	V136L	None	D283G & Y358N	None	137T>A & 142A>T & 562_563insA & 564C>A & 565T>G & 566T>C & 568G>A & 569G>T & 570_571insT & 1743G>A & 2223T>G & 2656C>T & 2814C>T & 2816T>C & 2819A>G & 2822G>A	None	None	729A>G & 733C>G & 737C>T & 745_746insA & 748T>A & 750delG & 765T>C & 847T>C	None	None
HUN49	None	None	E62K	None	None	None	None	1723G>A	79G>A & 80A>C & 89T>G & 90C>T & 93T>C	226A>G	79G>A & 80A>C & 89T>G & 90C>T & 93T>C & 1002A>G & 1006C>G & 1010C>T & 1018_1019insA & 1021T>A & 1023delG & 1038T>C & 1120T>C	None	None
HUN50	S83L	E185D & A618T & E703D	E62K & N385D & P401S	None	None	H2R & T246I & D282N & D283G	None	137T>A & 142A>T & 356G>A & 1171G>A & 1173delT & 1178C>T & 1211C>T & 1229C>T & 1723G>A & 1730C>T & 1870C>G & 1870_1871insT & 1872_1873insC & 2205A>G & 2209G>C & 2211A>G & 2215C>G & 2794C>T & 2796T>C & 2799A>G & 2802G>A	80A>C & 89T>G	79A>G & 90T>C & 93C>T & 226A>G	80A>C & 89T>G & 1002A>G & 1006C>G & 1010C>T & 1018_1019insA & 1021T>A & 1023delG & 1038T>C & 1120T>C	V13F & R24*	None
HUN56	None	None	E62K	V136L	None	D283G & Y358N	None	137T>A & 142A>T & 542_543insA & 544C>A & 545T>G & 546T>C & 548G>A & 549G>T & 550_551insT & 1723G>A & 2203T>G & 2636C>T & 2794C>T & 2796T>C & 2799A>G & 2802G>A	76G>A & 80A>C & 89T>G & 250A>T & 253A>T & 273T>A & 285C>T	76G>A & 79A>G & 90T>C & 93C>T & 226A>G & 250A>T & 253A>T & 273T>A & 285C>T	76G>A & 80A>C & 89T>G & 250A>T & 253A>T & 273T>A & 285C>T & 1002A>G & 1006C>G & 1010C>T & 1018_1019insA & 1021T>A & 1023delG & 1038T>C & 1120T>C	None	None
HUN58	H211Y & D678E	None	E62K	None	None	H2R & V351I	None	356G>A & 357C>T & 540_541insC & 541A>T & 543G>T & 544C>T & 548G>T & 550C>G & 552delT & 1171G>A & 1173delT & 1178C>T & 1211C>T & 1723G>A & 1865T>C & 2132T>A & 2203T>G & 2211A>G	1002G>A & 1006G>C & 1010T>C & 1019delA & 1022A>T & 1023_1024insG & 1038C>T	79A>G & 80C>A & 89G>T & 90T>C & 93C>T & 226A>G & 1002G>A & 1006G>C & 1010T>C & 1019delA & 1022A>T & 1023_1024insG & 1038C>T	1120T>C	None	None
HUN59	H211Y & D678E	None	E62K	None	None	H2R & V351I	None	356G>A & 357C>T & 540_541insC & 541A>T & 543G>T & 544C>T & 548G>T & 550C>G & 552delT & 1171G>A & 1173delT & 1178C>T & 1211C>T & 1723G>A & 1865T>C & 2132T>A & 2203T>G & 2211A>G	1002G>A & 1006G>C & 1010T>C & 1019delA & 1022A>T & 1023_1024insG & 1038C>T	79A>G & 80C>A & 89G>T & 90T>C & 93C>T & 226A>G & 1002G>A & 1006G>C & 1010T>C & 1019delA & 1022A>T & 1023_1024insG & 1038C>T	1120T>C	None	None
HUN7	None	None	E62K	None	None	None	None	1174T>G & 1723G>A & 1865T>C & 2132T>G	None	79A>G & 80C>A & 89G>T & 90T>C & 93C>T & 226A>G	1002A>G & 1006C>G & 1010C>T & 1018_1019insA & 1021T>A & 1023delG & 1038T>C & 1120T>C	None	None
HUN71	S83L & D87N	None	S80I & E62K	None	None	P220S & D283G & Y358N	None	137T>A & 142A>T & 356G>A & 542_543insA & 544C>A & 545T>G & 546T>C & 548G>A & 549G>T & 550_551insT & 1211C>T & 1220G>A & 1229C>T & 1723G>A & 2794C>T & 2796T>C & 2799A>G & 2802G>A	None	79A>G & 80C>A & 89G>T & 90T>C & 93C>T & 226A>G	1002A>G & 1006C>G & 1010C>T & 1018_1019insA & 1021T>A & 1023delG & 1038T>C & 1120T>C	None	None
HUN72	S83L	H652R	E62K	None	None	D283G & Y358N	None	137T>A & 142A>T & 316C>T & 1723G>A & 2211A>G & 2794C>T & 2796T>C & 2799A>G & 2802G>A	79G>A & 80A>C & 89T>G & 90C>T & 93T>C & 250A>T & 253A>T & 273T>A	226A>G & 250A>T & 253A>T & 273T>A	79G>A & 80A>C & 89T>G & 90C>T & 93T>C & 250A>T & 253A>T & 273T>A & 1002A>G & 1006C>G & 1010C>T & 1018_1019insA & 1021T>A & 1023delG & 1038T>C & 1120T>C	None	None
HUN75	S83L	None	E62K	None	None	H2R	None	285G>A & 356G>A & 357C>T & 550C>T & 1171G>A & 1173delT & 1175A>G & 1178C>T & 1211C>T & 1220G>A & 1229C>T & 1723G>A & 1725T>C & 1726C>G & 1727C>A & 1730C>T & 1733G>T & 1734G>C & 1735A>G & 1865T>C & 2794C>T & 2796T>C & 2799A>G & 2802G>A	80A>C & 89T>G & 93T>C	79A>G & 90T>C & 226A>G	80A>C & 89T>G & 93T>C & 1002A>G & 1006C>G & 1010C>T & 1018_1019insA & 1021T>A & 1023delG & 1038T>C & 1120T>C	None	None
HUN77	S83L & D87N	E219K	A56T & S80I & E62K & A620V	None	None	None	None	1723G>A & 2794C>T & 2796T>C & 2799A>G & 2802G>A	None	79A>G & 80C>A & 89G>T & 90T>C & 93C>T & 226A>G	1002A>G & 1006C>G & 1010C>T & 1018_1019insA & 1021T>A & 1023delG & 1038T>C & 1120T>C	None	None
HUN78	None	None	E62K	None	None	D283G & Y358N	None	137T>A & 142A>T & 356G>A & 542_543insA & 544C>A & 545T>G & 546T>C & 548G>A & 549G>T & 550_551insT & 1174T>G & 1211C>T & 1723G>A & 1865T>C & 2794C>T & 2796T>C & 2799A>G & 2802G>A	250A>T & 253A>T & 273T>A	79A>G & 80C>A & 89G>T & 90T>C & 93C>T & 226A>G & 250A>T & 253A>T & 273T>A	250A>T & 253A>T & 273T>A & 1002A>G & 1006C>G & 1010C>T & 1018_1019insA & 1021T>A & 1023delG & 1038T>C & 1120T>C	None	None
HUN8	V268I	None	E62K	None	None	H2R	None	547A>C & 1174T>G & 1723G>A & 1868_1869insC & 1872_1873insG & 2794C>T & 2796T>C & 2799A>G & 2802G>A	None	79A>G & 80C>A & 89G>T & 90T>C & 93C>T & 226A>G	1002A>G & 1006C>G & 1010C>T & 1018_1019insA & 1021T>A & 1023delG & 1038T>C & 1120T>C	None	None
HUN80	None	None	E62K	None	None	None	None	1174T>G & 1723G>A & 1872_1873insG & 2203T>G & 2211A>G & 2794C>T & 2796T>C & 2799A>G & 2802G>A	None	79A>G & 80C>A & 89G>T & 90T>C & 93C>T & 226A>G	1002A>G & 1006C>G & 1010C>T & 1018_1019insA & 1021T>A & 1023delG & 1038T>C & 1120T>C	None	None
HUN82	N652H	None	E62K	None	None	None	None	1723G>A & 2794C>T & 2796T>C & 2799A>G & 2802G>A	79G>A & 80A>C & 89T>G & 90C>T & 93T>C	226A>G	79G>A & 80A>C & 89T>G & 90C>T & 93T>C & 1002A>G & 1006C>G & 1010C>T & 1018_1019insA & 1021T>A & 1023delG & 1038T>C & 1120T>C	None	None
HUN83	S83L & D87N	None	S80I & E62K	None	None	H2R	None	1211C>T & 1221C>T & 1723G>A & 1730C>T & 1865T>C & 2132T>A & 2794C>T & 2796T>C & 2799A>G & 2802G>A	80A>C & 89T>G & 90C>T & 93T>C & 1002G>A & 1006G>C & 1010T>C & 1019delA & 1022A>T & 1023_1024insG & 1038C>T	79A>G & 226A>G & 1002G>A & 1006G>C & 1010T>C & 1019delA & 1022A>T & 1023_1024insG & 1038C>T	80A>C & 89T>G & 90C>T & 93T>C & 1120T>C	None	None
HUN84	S83L & D87N	None	A56T & S80I & E62K & R365H & A620V	None	None	D283G & Y358N	None	1211C>T & 1743G>A & 1750C>T & 1890C>G & 1891A>T & 2231A>G & 2656C>T	1002G>A & 1006G>C & 1010T>C & 1019delA & 1022A>T & 1023_1024insG & 1038C>T	79A>G & 80C>A & 89G>T & 90T>C & 93C>T & 226A>G & 1002G>A & 1006G>C & 1010T>C & 1019delA & 1022A>T & 1023_1024insG & 1038C>T	1120T>C	None	None
HUN89	S83L & D87N & D678E	None	S80I & E62K	S458A	None	None	F4Y	1211C>T & 1723G>A & 2794C>T & 2796T>C & 2799A>G & 2802G>A	None	79A>G & 80C>A & 89G>T & 90T>C & 93C>T & 226A>G	1002A>G & 1006C>G & 1010C>T & 1018_1019insA & 1021T>A & 1023delG & 1038T>C & 1120T>C	None	None
HUN9	D678E	None	E62K & N385D & P401S	None	None	H2R & T246I & D282N & D283G	None	356G>A & 541delA & 543G>T & 544_545insT & 548G>T & 550C>G & 552delT & 1171G>A & 1173delT & 1178C>T & 1211C>T & 1229C>T & 1723G>A & 1870C>G & 1870_1871insT & 1872_1873insC & 2205A>G & 2209G>C & 2211A>G & 2215C>G	None	79A>G & 80C>A & 89G>T & 90T>C & 93C>T & 226A>G	1120T>C	V13F & R24*	None
HUN92	S83L & D87N	None	S80I & E62K	None	None	P220S & D283G & Y358N	None	137T>A & 142A>T & 356G>A & 542_543insA & 544C>A & 545T>G & 546T>C & 548G>A & 549G>T & 550_551insT & 1723G>A & 1865T>C & 2794C>T & 2796T>C & 2799A>G & 2802G>A	80A>C & 89T>G & 93T>C & 250A>T & 253A>T & 273T>A	79A>G & 90T>C & 226A>G & 250A>T & 253A>T & 273T>A	80A>C & 89T>G & 93T>C & 250A>T & 253A>T & 273T>A & 1002A>G & 1006C>G & 1010C>T & 1018_1019insA & 1021T>A & 1023delG & 1038T>C & 1120T>C	None	None
HUN94	S83L & D87N & D678E	None	S57T & S80I & E62K & D197E & K200N & D309E & L344R & D475E	None	None	None	None	1171G>A & 1173delT & 1178C>T & 1211C>T & 1723G>A & 1725T>C & 1726C>G & 1727C>A & 1730C>T & 1733G>T & 1734G>C & 1735A>G & 1865T>C & 2794C>T & 2796T>C & 2799A>G & 2802G>A	79G>A & 80A>C & 89T>G & 90C>T & 93T>C	226A>G	79G>A & 80A>C & 89T>G & 90C>T & 93T>C & 1002A>G & 1006C>G & 1010C>T & 1018_1019insA & 1021T>A & 1023delG & 1038T>C & 1120T>C	None	None
HUNJ27	S83L & D87N & L581V	E219K	A56T & S80I & E62K & A620V	None	None	None	None	1171G>A & 1173delT & 1178C>T & 1211C>T & 1723G>A & 1868_1869insC & 1872_1873insG & 2794C>T & 2796T>C & 2799A>G & 2802G>A	None	79A>G & 80C>A & 89G>T & 90T>C & 93C>T & 226A>G	1002A>G & 1006C>G & 1010C>T & 1018_1019insA & 1021T>A & 1023delG & 1038T>C & 1120T>C	None	None
HUNS32	S83L & D87N	None	S80I & E62K	None	None	None	None	1723G>A & 1868_1869insC & 1872_1873insG & 2794C>T & 2796T>C & 2799A>G & 2802G>A	None	79A>G & 80C>A & 89G>T & 90T>C & 93C>T & 226A>G	1002A>G & 1006C>G & 1010C>T & 1018_1019insA & 1021T>A & 1023delG & 1038T>C & 1120T>C	None	None
HUNS33	S83L & R234C & A291V	E708K & R713H	S80I & E62K	V128I	None	D283G & Y358N	None	137T>A & 142A>T & 356G>A & 357C>T & 1174T>G & 1723G>A & 1725T>C & 1726C>G & 1727C>A & 1730C>T & 1733G>T & 1734G>C & 1735A>G & 1865T>C & 2794C>T & 2796T>C & 2799A>G & 2802G>A	80A>C & 89T>G & 183C>T & 250A>T & 253A>T & 273T>A	79A>G & 90T>C & 93C>T & 183C>T & 226A>G & 250A>T & 253A>T & 273T>A	80A>C & 89T>G & 183C>T & 250A>T & 253A>T & 273T>A & 1002A>G & 1006C>G & 1010C>T & 1018_1019insA & 1021T>A & 1023delG & 1038T>C & 1120T>C	None	R1156C
HUNS34	S83L & D87N	None	S80I & E62K	None	None	P220S & D283G & Y358N	None	137T>A & 142A>T & 356G>A & 542_543insA & 544C>A & 545T>G & 546T>C & 548G>A & 549G>T & 550_551insT & 1723G>A & 1865T>C & 2794C>T & 2796T>C & 2799A>G & 2802G>A	None	79A>G & 80C>A & 89G>T & 90T>C & 93C>T & 226A>G	1002A>G & 1006C>G & 1010C>T & 1018_1019insA & 1021T>A & 1023delG & 1038T>C & 1120T>C	None	None
HUNS46	S83L	None	E62K	None	None	D283G & Y358N	None	137T>A & 542_543insA & 544C>A & 545T>G & 546T>C & 548G>A & 549G>T & 550_551insT & 1723G>A & 1865T>C & 2203T>G & 2636C>T & 2794C>T & 2796T>C & 2799A>G & 2802G>A	None	79A>G & 80C>A & 89G>T & 90T>C & 93C>T & 226A>G	1002A>G & 1006C>G & 1010C>T & 1018_1019insA & 1021T>A & 1023delG & 1038T>C & 1120T>C	None	None
HUNS48	R371G	None	E62K	None	None	None	None	11C>A & 274C>T & 1211C>T & 1723G>A & 1730C>T	79G>A & 80A>C & 89T>G & 90C>T & 93T>C	226A>G	79G>A & 80A>C & 89T>G & 90C>T & 93T>C & 1002A>G & 1006C>G & 1010C>T & 1018_1019insA & 1021T>A & 1023delG & 1038T>C & 1120T>C	None	None
JL33	S83L & D87N	None	S80I & E62K	None	None	D283G & Y358N	None	137T>A & 142A>T & 542_543insA & 544C>A & 545T>G & 546T>C & 548G>A & 549G>T & 550_551insT & 1723G>A & 1725T>C & 1726C>G & 1727C>A & 1730C>T & 1733G>T & 1734G>C & 1735A>G & 1865T>C & 2794C>T & 2796T>C & 2799A>G & 2802G>A	79G>A & 80A>C & 89T>G & 90C>T & 93T>C & 250A>T & 253A>T & 273T>A	226A>G & 250A>T & 253A>T & 273T>A	79G>A & 80A>C & 89T>G & 90C>T & 93T>C & 250A>T & 253A>T & 273T>A & 1002A>G & 1006C>G & 1010C>T & 1018_1019insA & 1021T>A & 1023delG & 1038T>C & 1120T>C	None	None
JS77	S83L & D87N	None	E84K & E62K	None	V75I	D283G & Y358N	None	1171G>A & 1173delT & 1178C>T & 1506T>C & 1507C>T & 1723G>A & 1725T>C & 1726C>G & 1727C>A & 1730C>T & 1733G>T & 1734G>C & 1735A>G & 1865T>C & 2132T>G & 2794C>T & 2796T>C & 2799A>G & 2802G>A	76G>A & 250A>T & 253A>T & 273T>A	76G>A & 79A>G & 80C>A & 89G>T & 90T>C & 93C>T & 226A>G & 250A>T & 253A>T & 273T>A	76G>A & 250A>T & 253A>T & 273T>A & 1002A>G & 1006C>G & 1010C>T & 1018_1019insA & 1021T>A & 1023delG & 1038T>C & 1120T>C	None	None
JX10	S83L & D87N & D678E	None	S80I & E62K	S458A	None	None	F4Y	1723G>A & 2794C>T & 2796T>C & 2799A>G & 2802G>A	None	79A>G & 80C>A & 89G>T & 90T>C & 93C>T & 226A>G	1002A>G & 1006C>G & 1010C>T & 1018_1019insA & 1021T>A & 1023delG & 1038T>C & 1120T>C	None	None
JX12	None	E85D	E62K & G449S & G579R	None	None	H2R & P220S & D283G & Y358N	None	137T>A & 142A>T & 1171G>A & 1173delT & 1178C>T & 1211C>T & 1220G>A & 1229C>T & 1723G>A & 1725T>C & 1726C>G & 1727C>A & 1730C>T & 1733G>T & 1734G>C & 1735A>G & 1865T>C & 2203T>G & 2794C>T & 2796T>C & 2799A>G & 2802G>A & 2844G>A	250A>T & 253A>T & 273T>A	79A>G & 80C>A & 89G>T & 90T>C & 93C>T & 226A>G & 250A>T & 253A>T & 273T>A	250A>T & 253A>T & 273T>A & 1002A>G & 1006C>G & 1010C>T & 1018_1019insA & 1021T>A & 1023delG & 1038T>C & 1120T>C	None	None
JX13	S83L & D87N	E219K	A56T & S80I & E62K & A620V	None	None	None	None	1723G>A & 2794C>T & 2796T>C & 2799A>G & 2802G>A	None	79A>G & 80C>A & 89G>T & 90T>C & 93C>T & 226A>G	1002A>G & 1006C>G & 1010C>T & 1018_1019insA & 1021T>A & 1023delG & 1038T>C & 1120T>C	None	None
JX16	S83L & D87N	E219K	A56T & S80I & E62K & A620V	None	None	None	None	1723G>A & 2794C>T & 2796T>C & 2799A>G & 2802G>A	79G>A & 80A>C & 89T>G & 90C>T & 93T>C	226A>G	79G>A & 80A>C & 89T>G & 90C>T & 93T>C & 1002A>G & 1006C>G & 1010C>T & 1018_1019insA & 1021T>A & 1023delG & 1038T>C & 1120T>C	None	None
JX18	None	None	E62K & R406W	V152I	None	None	None	547A>C & 846T>C & 849A>G & 1174T>G & 1723G>A & 1725T>C & 1726C>G & 1727C>A & 1730C>T & 1733G>T & 1734G>C & 1735A>G & 2132T>A	None	79A>G & 80C>A & 89G>T & 90T>C & 93C>T & 226A>G	1002A>G & 1006C>G & 1010C>T & 1018_1019insA & 1021T>A & 1023delG & 1038T>C & 1120T>C	None	None
JX21	S83L & D87N	None	S80I & E62K	None	None	P220S & D283G & Y358N	None	137T>A & 142A>T & 356G>A & 542_543insA & 544C>A & 545T>G & 546T>C & 548G>A & 549G>T & 550_551insT & 1723G>A & 1865T>C & 2794C>T & 2796T>C & 2799A>G & 2802G>A	80A>C & 89T>G & 93T>C & 250A>T & 253A>T & 273T>A	79A>G & 90T>C & 226A>G & 250A>T & 253A>T & 273T>A	80A>C & 89T>G & 93T>C & 250A>T & 253A>T & 273T>A & 1002A>G & 1006C>G & 1010C>T & 1018_1019insA & 1021T>A & 1023delG & 1038T>C & 1120T>C	None	None
JX23	S83L & D678E	None	E62K	V136I	None	H2R	None	282T>C & 1459G>A & 1464C>A & 2530C>T & 2532T>C & 2535A>G & 2538G>A	250A>T	79A>G & 80C>A & 89G>T & 90T>C & 93C>T & 226A>G & 250A>T	250A>T & 1002A>G & 1006C>G & 1010C>T & 1018_1019insA & 1021T>A & 1023delG & 1038T>C & 1120T>C	None	None
JX25	S83L	None	E62K	None	None	D283G & Y358N	None	137T>A & 142A>T & 1723G>A & 1725T>C & 1726C>G & 1727C>A & 1730C>T & 1733G>T & 1734G>C & 1735A>G & 2203T>G & 2636C>T & 2794C>T & 2796T>C & 2799A>G & 2802G>A	None	79A>G & 80C>A & 89G>T & 90T>C & 93C>T & 226A>G	1120T>C	None	None
JX26	None	None	E62K	None	None	D283G & Y358N	None	137T>A & 142A>T & 1723G>A & 2211A>G & 2636C>T & 2794C>T & 2796T>C & 2799A>G & 2802G>A	None	79A>G & 80C>A & 89G>T & 90T>C & 93C>T & 226A>G	1002A>G & 1006C>G & 1010C>T & 1018_1019insA & 1021T>A & 1023delG & 1038T>C & 1120T>C	None	V1169I
JX38	S83L & D87N	None	S80I & E62K	None	None	P220S & D283G & Y358N	None	137T>A & 142A>T & 356G>A & 542_543insA & 544C>A & 545T>G & 546T>C & 548G>A & 549G>T & 550_551insT & 1723G>A & 1865T>C & 2794C>T & 2796T>C & 2799A>G & 2802G>A	76G>A & 79G>A & 80A>C & 89T>G & 90C>T & 93T>C & 250A>T & 253A>T & 273T>A	76G>A & 226A>G & 250A>T & 253A>T & 273T>A	76G>A & 79G>A & 80A>C & 89T>G & 90C>T & 93T>C & 250A>T & 253A>T & 273T>A & 1002A>G & 1006C>G & 1010C>T & 1018_1019insA & 1021T>A & 1023delG & 1038T>C & 1120T>C	None	None
JX39	S83L & D87N & D678E	None	S80I & E62K	S458A	None	None	F4Y	1211C>T & 1723G>A & 1868_1869insC & 1872_1873insG & 2132T>A & 2794C>T & 2796T>C & 2799A>G & 2802G>A	None	79A>G & 80C>A & 89G>T & 90T>C & 93C>T & 226A>G	1002A>G & 1006C>G & 1010C>T & 1018_1019insA & 1021T>A & 1023delG & 1038T>C & 1120T>C	None	None
JX4	S83L & D87N	None	A56T & S80I & E62K & A620V	None	None	None	None	143C>T & 316C>T & 356G>A & 1211C>T & 2794C>T & 2796T>C & 2799A>G & 2802G>A	None	79A>G & 80C>A & 89G>T & 90T>C & 93C>T & 226A>G	1002A>G & 1006C>G & 1010C>T & 1018_1019insA & 1021T>A & 1023delG & 1038T>C & 1120T>C	None	None
JX40	S83L & V839I	None	E62K	None	None	D283G & Y358N	None	137T>A & 142A>T & 1211C>T & 1723G>A & 2636C>T & 2794C>T & 2796T>C & 2799A>G & 2802G>A	76G>A	76G>A & 79A>G & 80C>A & 89G>T & 90T>C & 93C>T & 226A>G	76G>A & 1120T>C	None	None
JX42	S83L & D87N	None	A56T & S80I & E62K & A620V	None	None	None	None	143C>T & 316C>T & 356G>A & 1723G>A & 2794C>T & 2796T>C & 2799A>G & 2802G>A	None	79A>G & 80C>A & 89G>T & 90T>C & 93C>T & 226A>G	1002A>G & 1006C>G & 1010C>T & 1018_1019insA & 1021T>A & 1023delG & 1038T>C & 1120T>C	None	None
JX45	S83L & D87N	None	S80I & E62K	S458A	G144S	D283G & Y358N	None	137T>A & 142A>T & 1211C>T & 1723G>A & 1865T>C & 2132T>A & 2794C>T & 2796T>C & 2799A>G & 2802G>A	80A>C & 89T>G & 93T>C & 1002G>A & 1006G>C & 1010T>C & 1019delA & 1022A>T & 1023_1024insG & 1038C>T	79A>G & 90T>C & 226A>G & 1002G>A & 1006G>C & 1010T>C & 1019delA & 1022A>T & 1023_1024insG & 1038C>T	80A>C & 89T>G & 93T>C & 1120T>C	None	None
LN10	S83L & D87N	None	S80I & E62K	None	None	H2R	None	1211C>T & 1723G>A & 1730C>T & 1865T>C & 2132T>A & 2794C>T & 2796T>C & 2799A>G & 2802G>A	80A>C & 89T>G & 1002G>A & 1006G>C & 1010T>C & 1019delA & 1022A>T & 1023_1024insG & 1038C>T	79A>G & 90T>C & 93C>T & 226A>G & 1002G>A & 1006G>C & 1010T>C & 1019delA & 1022A>T & 1023_1024insG & 1038C>T	80A>C & 89T>G & 1120T>C	None	None
LN13	None	None	E62K	None	None	D283G & Y358N	None	137T>A & 142A>T & 1211C>T & 1723G>A & 2152T>A & 2231A>G	None	79A>G & 80C>A & 89G>T & 90T>C & 93C>T & 226A>G	1120T>C	None	None
LN32	S83L & D87N	None	S80I & E62K	None	None	H2R	None	1211C>T & 1723G>A & 1730C>T & 1865T>C & 2132T>A & 2794C>T & 2796T>C & 2799A>G & 2802G>A	80A>C & 89T>G & 90C>T & 93T>C & 1002G>A & 1006G>C & 1010T>C & 1019delA & 1022A>T & 1023_1024insG & 1038C>T	79A>G & 226A>G & 1002G>A & 1006G>C & 1010T>C & 1019delA & 1022A>T & 1023_1024insG & 1038C>T	80A>C & 89T>G & 90C>T & 93T>C & 1120T>C	None	None
LN35	S83L	None	S80I & E62K & G473A	None	None	D283G & Y358N	None	137T>A & 142A>T & 1723G>A & 1865T>C & 2794C>T & 2796T>C & 2799A>G & 2802G>A	80A>C	79A>G & 89G>T & 90T>C & 93C>T & 226A>G	80A>C & 1002A>G & 1006C>G & 1010C>T & 1018_1019insA & 1021T>A & 1023delG & 1038T>C & 1120T>C	None	None
LN36	S83L & D87N	None	E84K & E62K	L416F & V147M	None	D283G & Y358N	None	137T>A & 142A>T & 1171G>A & 1173delT & 1178C>T & 1211C>T & 1220G>A & 1229C>T & 1723G>A & 1865T>C & 2794C>T & 2796T>C & 2799A>G & 2802G>A	80A>C & 89T>G & 183C>T	79A>G & 90T>C & 93C>T & 183C>T & 226A>G	80A>C & 89T>G & 183C>T & 1002A>G & 1006C>G & 1010C>T & 1018_1019insA & 1021T>A & 1023delG & 1038T>C & 1120T>C	None	None
LN42	S83L & D87Y	None	S80I & E62K	S458A	G144S	D283G & Y358N	None	137T>A & 142A>T & 1174T>G & 2794C>T & 2796T>C & 2799A>G & 2802G>A	80A>C & 89T>G & 93T>C & 1002G>A & 1006G>C & 1010T>C & 1019delA & 1022A>T & 1023_1024insG & 1038C>T	79A>G & 90T>C & 226A>G & 1002G>A & 1006G>C & 1010T>C & 1019delA & 1022A>T & 1023_1024insG & 1038C>T	80A>C & 89T>G & 93T>C & 1120T>C	None	None
LN43	S83L & D87N	E185D & S492N & A618T	S80I & E84G & E62K & D475E	I355T & V136I & V153I	None	H2R & D283G & A360V	None	137T>A & 142A>T & 1171G>A & 1173delT & 1178C>T & 1211C>T & 1220G>A & 1229C>T & 1723G>A & 1725T>C & 1726C>G & 1727C>A & 1730C>T & 1733G>T & 1734G>C & 1735A>G & 1870C>G & 1870_1871insT & 1872_1873insC & 2163A>G & 2205A>G & 2209G>C & 2211A>G & 2213T>C & 2215C>G & 2794C>T & 2796T>C & 2799A>G & 2802G>A	80A>C & 89T>G & 183C>T & 1002G>A & 1006G>C & 1010T>C & 1019delA & 1022A>T & 1023_1024insG & 1038C>T	79A>G & 90T>C & 93C>T & 183C>T & 226A>G & 1002G>A & 1006G>C & 1010T>C & 1019delA & 1022A>T & 1023_1024insG & 1038C>T	80A>C & 89T>G & 183C>T & 1120T>C	None	None
LN44	S83L & D87N	None	S80I & E62K & R406W	None	None	None	None	264C>G & 846T>C & 1171G>A & 1173delT & 1178C>T & 1211C>T & 1723G>A & 1725T>C & 1726C>G & 1727C>A & 1730C>T & 1733G>T & 1734G>C & 1735A>G & 2132T>G & 2794C>T & 2796T>C & 2799A>G & 2802G>A	None	79A>G & 80C>A & 89G>T & 90T>C & 93C>T & 226A>G	1002A>G & 1006C>G & 1010C>T & 1018_1019insA & 1021T>A & 1023delG & 1038T>C & 1120T>C	None	None
LN59	None	None	E62K	None	None	D283G & Y358N	None	137T>A & 142A>T & 1211C>T & 1723G>A & 2152T>A & 2231A>G	None	79A>G & 80C>A & 89G>T & 90T>C & 93C>T & 226A>G	1120T>C	None	None
LN62	S83L & D87N	None	S80I & E62K	None	None	A169E & D283G & Y358N	None	137T>A & 142A>T & 356G>A & 542_543insA & 544C>A & 545T>G & 546T>C & 548G>A & 549G>T & 550_551insT & 1723G>A & 1865T>C & 2794C>T & 2796T>C & 2799A>G & 2802G>A	None	79A>G & 80C>A & 89G>T & 90T>C & 93C>T & 226A>G	1002A>G & 1006C>G & 1010C>T & 1018_1019insA & 1021T>A & 1023delG & 1038T>C & 1120T>C	None	None
LN64	None	None	E62K & R681H	None	None	D283G & Y358N	None	137T>A & 142A>T & 1174T>G & 1723G>A & 2794C>T & 2796T>C & 2799A>G & 2802G>A	80A>C & 89T>G & 93T>C	79A>G & 90T>C & 226A>G	80A>C & 89T>G & 93T>C & 1120T>C	None	None
LN69	None	None	E62K	None	None	D283G & P294L & Y358N	None	137T>A & 142A>T & 356G>A & 542_543insA & 544C>A & 545T>G & 546T>C & 548G>A & 549G>T & 550_551insT & 1723G>A & 2794C>T & 2796T>C & 2799A>G & 2802G>A	250A>T & 253A>T & 273T>A	79A>G & 80C>A & 89G>T & 90T>C & 93C>T & 226A>G & 250A>T & 253A>T & 273T>A	250A>T & 253A>T & 273T>A & 1120T>C	None	None
LN73	S83L & D87N	None	A56T & S80I & E62K & R365H & A620V	None	None	None	None	137T>A & 142A>T & 2794C>T & 2796T>C & 2799A>G & 2802G>A	None	79A>G & 80C>A & 89G>T & 90T>C & 93C>T & 226A>G	1002A>G & 1006C>G & 1010C>T & 1018_1019insA & 1021T>A & 1023delG & 1038T>C & 1120T>C	None	None
LN74	S83L & D87N	None	S80I & E62K	None	None	H2Y & E298G	None	1723G>A & 1725T>C & 1726C>G & 1727C>A & 1730C>T & 1733G>T & 1734G>C & 1735A>G & 1865T>C & 2794C>T & 2796T>C & 2799A>G & 2802G>A	None	79A>G & 80C>A & 89G>T & 90T>C & 93C>T & 226A>G	1002A>G & 1006C>G & 1010C>T & 1018_1019insA & 1021T>A & 1023delG & 1038T>C & 1120T>C	None	None
LN75	S83L & D87N	None	S80I & E62K	None	None	H2Y & E298G	None	1723G>A & 1725T>C & 1726C>G & 1727C>A & 1730C>T & 1733G>T & 1734G>C & 1735A>G & 1865T>C & 2794C>T & 2796T>C & 2799A>G & 2802G>A	None	79A>G & 80C>A & 89G>T & 90T>C & 93C>T & 226A>G	1002A>G & 1006C>G & 1010C>T & 1018_1019insA & 1021T>A & 1023delG & 1038T>C & 1120T>C	None	None
NMG10	S83L & D87N & D678E & A863V	S492N & A618T	S80I & E62K & D475E	S458A & T172A	None	H2R & D283G	None	356G>A & 541delA & 543G>T & 546_547insA & 548G>T & 550C>G & 552delT & 1723G>A & 1869_1870insG & 1870C>T & 1872_1873insC & 2794C>T	264C>A & 1002G>A & 1006G>C & 1010T>C & 1019delA & 1022A>T & 1023_1024insG & 1038C>T	79A>G & 80C>A & 89G>T & 90T>C & 93C>T & 226A>G & 264C>A & 1002G>A & 1006G>C & 1010T>C & 1019delA & 1022A>T & 1023_1024insG & 1038C>T	264C>A & 1120T>C	None	None
NMG12	P872S	None	E62K	None	None	D283G & Y358N	None	137T>A & 142A>T & 1506T>C & 1507C>T & 1723G>A & 2794C>T & 2796T>C & 2799A>G & 2802G>A	79G>A & 80A>C & 89T>G & 90C>T & 93T>C	226A>G	79G>A & 80A>C & 89T>G & 90C>T & 93T>C & 1002A>G & 1006C>G & 1010C>T & 1018_1019insA & 1021T>A & 1023delG & 1038T>C & 1120T>C	None	None
NMG22	None	None	E62K	None	None	D283G & Y358N	None	137T>A & 142A>T & 542_543insA & 544C>A & 545T>G & 546T>C & 548G>A & 549G>T & 550_551insT & 1211C>T & 1723G>A & 1725T>C & 1726C>G & 1727C>A & 1730C>T & 1733G>T & 1734G>C & 1735A>G	250A>T & 253A>T & 273T>A	79A>G & 80C>A & 89G>T & 90T>C & 93C>T & 226A>G & 250A>T & 253A>T & 273T>A	250A>T & 253A>T & 273T>A & 1120T>C	None	None
NMG24	S83L & D87N	None	S80I & E62K	None	None	D283G & Y358N	None	137T>A & 142A>T & 356G>A & 1723G>A & 2794C>T & 2796T>C & 2799A>G & 2802G>A	250A>T & 253A>T & 273T>A	79A>G & 80C>A & 89G>T & 90T>C & 93C>T & 226A>G & 250A>T & 253A>T & 273T>A	250A>T & 253A>T & 273T>A & 1002A>G & 1006C>G & 1010C>T & 1018_1019insA & 1021T>A & 1023delG & 1038T>C & 1120T>C	None	None
NMG25	S83L & D87N & A828T	None	S80I & E62K	None	L190V	D283G & Y358N	None	542_543insA & 544C>A & 545T>G & 546T>C & 548G>A & 549G>T & 550_551insT & 914G>A & 1211C>T & 1723G>A & 1865T>C & 2211A>G & 2794C>T & 2796T>C & 2799A>G & 2802G>A	250A>T & 253A>T & 273T>A	79A>G & 80C>A & 89G>T & 90T>C & 93C>T & 226A>G & 250A>T & 253A>T & 273T>A	250A>T & 253A>T & 273T>A & 1120T>C	None	None
NMG29	None	None	E62K	V147M	None	D283G & Y358N	None	137T>A & 142A>T & 1211C>T & 1220G>A & 1229C>T & 1723G>A & 1865T>C & 2794C>T & 2796T>C & 2799A>G & 2802G>A	80A>C & 89T>G & 183C>T	79A>G & 90T>C & 93C>T & 183C>T & 226A>G	80A>C & 89T>G & 183C>T & 1002A>G & 1006C>G & 1010C>T & 1018_1019insA & 1021T>A & 1023delG & 1038T>C & 1120T>C	None	None
NMG3	None	None	E62K	None	None	D283G & Y358N	G133D	137T>A & 142A>T & 313G>A & 542_543insA & 544C>A & 545T>G & 546T>C & 548G>A & 549G>T & 550_551insT & 1211C>T & 1220G>A & 1229C>T & 1723G>A & 2794C>T & 2796T>C & 2799A>G & 2802G>A	80A>C & 89T>G & 93T>C & 1002G>A & 1006G>C & 1010T>C & 1019delA & 1022A>T & 1023_1024insG & 1038C>T	79A>G & 90T>C & 226A>G & 1002G>A & 1006G>C & 1010T>C & 1019delA & 1022A>T & 1023_1024insG & 1038C>T	80A>C & 89T>G & 93T>C & 1120T>C	None	None
NMG32	None	None	E62K	None	E184D	None	None	None	None	79A>G & 80C>A & 89G>T & 90T>C & 93C>T & 226A>G	1002A>G & 1006C>G & 1010C>T & 1018_1019insA & 1021T>A & 1023delG & 1038T>C & 1120T>C	None	None
NMG39	None	None	E62K	None	None	D283G & Y358N	None	137T>A & 142A>T & 1211C>T & 1865T>C	250A>T & 253A>T & 273T>A	79A>G & 80C>A & 89G>T & 90T>C & 93C>T & 226A>G & 250A>T & 253A>T & 273T>A	250A>T & 253A>T & 273T>A & 1120T>C	None	K1027R
NMG42	S83L & D87N	E219K	A56T & S80I & E62K & A620V	None	None	None	None	1723G>A & 2794C>T & 2796T>C & 2799A>G & 2802G>A	79G>A & 80A>C & 89T>G & 90C>T & 93T>C	226A>G	79G>A & 80A>C & 89T>G & 90C>T & 93T>C & 1002A>G & 1006C>G & 1010C>T & 1018_1019insA & 1021T>A & 1023delG & 1038T>C & 1120T>C	None	None
NMG46	S83L & D87N	None	S80I & E62K	None	None	H2R	None	1211C>T & 1723G>A & 1730C>T & 1865T>C & 2132T>A & 2794C>T & 2796T>C & 2799A>G & 2802G>A	80A>C & 89T>G & 93T>C & 1002G>A & 1006G>C & 1010T>C & 1019delA & 1022A>T & 1023_1024insG & 1038C>T	79A>G & 90T>C & 226A>G & 1002G>A & 1006G>C & 1010T>C & 1019delA & 1022A>T & 1023_1024insG & 1038C>T	80A>C & 89T>G & 93T>C & 1120T>C	None	None
NMG47	S83L & D87N & D678E	None	S80I & E62K	S458A	None	None	F4Y	1211C>T & 1723G>A & 1868_1869insC & 1872_1873insG & 2794C>T & 2796T>C & 2797T>C & 2799A>G & 2802G>A	None	79A>G & 80C>A & 89G>T & 90T>C & 93C>T & 226A>G	1002A>G & 1006C>G & 1010C>T & 1018_1019insA & 1021T>A & 1023delG & 1038T>C & 1120T>C	None	None
NMG48	S83L & D87N	None	A56T & S80I & E62K & R365H & A620V	None	None	D283G & Y358N	None	1211C>T & 1723G>A & 1730C>T & 1870C>G & 1870_1871insT & 1872_1873insC & 2636C>T	80A>C & 1002G>A & 1006G>C & 1010T>C & 1019delA & 1022A>T & 1023_1024insG & 1038C>T	79A>G & 89G>T & 90T>C & 93C>T & 226A>G & 1002G>A & 1006G>C & 1010T>C & 1019delA & 1022A>T & 1023_1024insG & 1038C>T	80A>C & 1120T>C	None	None
NMG49	S83L & D87N & D678E	None	S80I & E62K	S458A	None	None	F4Y	1211C>T & 1723G>A & 2794C>T & 2796T>C & 2797T>C & 2799A>G & 2802G>A	None	79A>G & 80C>A & 89G>T & 90T>C & 93C>T & 226A>G	1002A>G & 1006C>G & 1010C>T & 1018_1019insA & 1021T>A & 1023delG & 1038T>C & 1120T>C	None	None
NMG5	None	None	E62K	None	None	D283G & Y358N	None	137T>A & 142A>T & 313G>A & 542_543insA & 544C>A & 545T>G & 546T>C & 548G>A & 549G>T & 550_551insT & 1211C>T & 1220G>A & 1229C>T & 1723G>A & 2794C>T & 2796T>C & 2799A>G & 2802G>A	80A>C & 89T>G & 93T>C & 1002G>A & 1006G>C & 1010T>C & 1019delA & 1022A>T & 1023_1024insG & 1038C>T	79A>G & 90T>C & 226A>G & 1002G>A & 1006G>C & 1010T>C & 1019delA & 1022A>T & 1023_1024insG & 1038C>T	80A>C & 89T>G & 93T>C & 1120T>C	None	None
NMG50	S83L & D87N & D678E	None	S80I & E62K	S458A	None	None	F4Y	1211C>T & 1723G>A & 2794C>T & 2796T>C & 2799A>G & 2802G>A	None	79A>G & 80C>A & 89G>T & 90T>C & 93C>T & 226A>G	1002A>G & 1006C>G & 1010C>T & 1018_1019insA & 1021T>A & 1023delG & 1038T>C & 1120T>C	None	None
NMG6	S83L & D87N	E219K	A56T & S80I & E62K & A620V	None	None	None	None	1723G>A & 2794C>T & 2796T>C & 2799A>G & 2802G>A	None	79A>G & 80C>A & 89G>T & 90T>C & 93C>T & 226A>G	1002A>G & 1006C>G & 1010C>T & 1018_1019insA & 1021T>A & 1023delG & 1038T>C & 1120T>C	None	None
NMG7	S83L	None	E62K & T501A	None	G144S	D283G & Y358N	None	541delA & 543G>T & 544_545insT & 548G>T & 550C>G & 552delT & 1174T>G & 1211C>T & 1723G>A & 1865T>C & 2132T>A & 2794C>T & 2796T>C & 2799A>G & 2802G>A	80A>C & 89T>G & 93T>C & 1002G>A & 1006G>C & 1010T>C & 1019delA & 1022A>T & 1023_1024insG & 1038C>T	79A>G & 90T>C & 226A>G & 1002G>A & 1006G>C & 1010T>C & 1019delA & 1022A>T & 1023_1024insG & 1038C>T	80A>C & 89T>G & 93T>C & 1120T>C	None	None
NMG8	None	None	E62K	None	None	D283G & Y358N	None	137T>A & 142A>T & 313G>A & 542_543insA & 544C>A & 545T>G & 546T>C & 548G>A & 549G>T & 550_551insT & 1211C>T & 1220G>A & 1229C>T & 1723G>A & 2794C>T & 2796T>C & 2799A>G & 2802G>A	80A>C & 89T>G & 93T>C & 1002G>A & 1006G>C & 1010T>C & 1019delA & 1022A>T & 1023_1024insG & 1038C>T	79A>G & 90T>C & 226A>G & 1002G>A & 1006G>C & 1010T>C & 1019delA & 1022A>T & 1023_1024insG & 1038C>T	80A>C & 89T>G & 93T>C & 1120T>C	None	None
NMG9	None	None	E62K	None	None	D283G & Y358N	G133D	137T>A & 142A>T & 313G>A & 542_543insA & 544C>A & 545T>G & 546T>C & 548G>A & 549G>T & 550_551insT & 1211C>T & 1220G>A & 1229C>T & 1723G>A & 2794C>T & 2796T>C & 2799A>G & 2802G>A	80A>C & 89T>G & 1002G>A & 1006G>C & 1010T>C & 1019delA & 1022A>T & 1023_1024insG & 1038C>T	79A>G & 90T>C & 93C>T & 226A>G & 1002G>A & 1006G>C & 1010T>C & 1019delA & 1022A>T & 1023_1024insG & 1038C>T	80A>C & 89T>G & 1120T>C	None	None
NX2	N12S	None	E62K	None	None	None	None	137T>A & 142A>T & 1723G>A & 1865T>C & 2794C>T & 2796T>C & 2799A>G & 2802G>A	80A>C & 89T>G & 93T>C & 1002G>A & 1006G>C & 1010T>C & 1019delA & 1022A>T & 1023_1024insG & 1038C>T	79A>G & 90T>C & 226A>G & 1002G>A & 1006G>C & 1010T>C & 1019delA & 1022A>T & 1023_1024insG & 1038C>T	80A>C & 89T>G & 93T>C & 1120T>C	None	None
NX28	S83L & N652H	None	E62K	None	None	None	None	137T>A & 142A>T & 547A>C & 1174T>G & 1211C>T & 1723G>A & 1865T>C	None	79A>G & 80C>A & 89G>T & 90T>C & 93C>T & 226A>G	1120T>C	None	None
QH1	S83L & D87N	None	S80I & E62K	None	None	P220S & D283G & Y358N	None	137T>A & 142A>T & 356G>A & 542_543insA & 544C>A & 545T>G & 546T>C & 548G>A & 549G>T & 550_551insT & 1723G>A & 2794C>T & 2796T>C & 2799A>G & 2802G>A	None	79A>G & 80C>A & 89G>T & 90T>C & 93C>T & 226A>G	1002A>G & 1006C>G & 1010C>T & 1018_1019insA & 1021T>A & 1023delG & 1038T>C & 1120T>C	None	None
QH10	S83L & D87N & D678E	None	S57T & S80I & E62K & D197E & K200N & D309E & L344R & D475E	None	None	None	None	1723G>A & 1725T>C & 1726C>G & 1727C>A & 1730C>T & 1733G>T & 1734G>C & 1735A>G & 2636C>T & 2794C>T & 2796T>C & 2799A>G & 2802G>A	None	79A>G & 80C>A & 89G>T & 90T>C & 93C>T & 226A>G	1002A>G & 1006C>G & 1010C>T & 1018_1019insA & 1021T>A & 1023delG & 1038T>C & 1120T>C	None	None
QH12	S83L & D87N	None	S80I & E62K	S458A	None	H2R	None	541delA & 543G>T & 544_545insT & 548G>T & 550C>G & 552delT & 1171G>A & 1173delT & 1178C>T & 1211C>T & 1220G>A & 1229C>T & 1723G>A & 1865T>C & 2132T>G & 2794C>T & 2796T>C & 2799A>G & 2802G>A	80A>C & 89T>G & 93T>C & 1002G>A & 1006G>C & 1010T>C & 1019delA & 1022A>T & 1023_1024insG & 1038C>T	79A>G & 90T>C & 226A>G & 1002G>A & 1006G>C & 1010T>C & 1019delA & 1022A>T & 1023_1024insG & 1038C>T	80A>C & 89T>G & 93T>C & 1120T>C	A7V	None
QH13	None	None	E62K	None	None	D283G & Y358N	None	297G>A & 1664G>A & 1806T>C & 2735C>T & 2737T>C & 2740A>G & 2743G>A	79G>A & 80A>C & 89T>G & 90C>T & 93T>C & 250A>T & 253A>T & 273T>A	226A>G & 250A>T & 253A>T & 273T>A	79G>A & 80A>C & 89T>G & 90C>T & 93T>C & 250A>T & 253A>T & 273T>A & 1120T>C	None	None
QH17	S83L & D87N	None	S80I & E62K	None	None	P220S & D283G & Y358N	None	137T>A & 142A>T & 356G>A & 542_543insA & 544C>A & 545T>G & 546T>C & 548G>A & 549G>T & 550_551insT & 1723G>A & 2794C>T & 2796T>C & 2799A>G & 2802G>A	None	79A>G & 80C>A & 89G>T & 90T>C & 93C>T & 226A>G	1002A>G & 1006C>G & 1010C>T & 1018_1019insA & 1021T>A & 1023delG & 1038T>C & 1120T>C	None	None
QH18	S83L & D87N	None	S80I & E62K	None	None	D283G & Y358N	None	137T>A & 142A>T & 356G>A & 1723G>A & 2794C>T & 2796T>C & 2799A>G & 2802G>A	250A>T & 253A>T & 273T>A	79A>G & 80C>A & 89G>T & 90T>C & 93C>T & 226A>G & 250A>T & 253A>T & 273T>A	250A>T & 253A>T & 273T>A & 1002A>G & 1006C>G & 1010C>T & 1018_1019insA & 1021T>A & 1023delG & 1038T>C & 1120T>C	None	T335M
QH2	None	None	E62K	None	None	D283G & Y358N	None	78T>A & 83A>T & 297G>A & 1664G>A & 2735C>T & 2737T>C & 2740A>G & 2743G>A	250A>T & 253A>T & 273T>A	79A>G & 80C>A & 89G>T & 90T>C & 93C>T & 226A>G & 250A>T & 253A>T & 273T>A	250A>T & 253A>T & 273T>A & 1002A>G & 1006C>G & 1010C>T & 1018_1019insA & 1021T>A & 1023delG & 1038T>C & 1120T>C	None	None
QH3	S83L & D87N & A828T	None	S80I & E62K	None	None	D283G & Y358N	None	137T>A & 142A>T & 914G>A & 1723G>A & 1865T>C & 2211A>G & 2794C>T & 2796T>C & 2799A>G & 2802G>A	80A>C & 250A>T & 253A>T & 273T>A & 1002G>A & 1006G>C & 1010T>C & 1019delA & 1022A>T & 1023_1024insG & 1038C>T	79A>G & 89G>T & 90T>C & 93C>T & 226A>G & 250A>T & 253A>T & 273T>A & 1002G>A & 1006G>C & 1010T>C & 1019delA & 1022A>T & 1023_1024insG & 1038C>T	80A>C & 250A>T & 253A>T & 273T>A & 1120T>C	None	None
QH4	S83L & D87N	None	S80I & E62K	S458A	None	H2R	None	541delA & 543G>T & 544_545insT & 548G>T & 550C>G & 552delT & 1171G>A & 1173delT & 1178C>T & 1211C>T & 1220G>A & 1229C>T & 1723G>A & 1865T>C & 2132T>G & 2794C>T & 2796T>C & 2799A>G & 2802G>A	80A>C & 89T>G & 93T>C & 1002G>A & 1006G>C & 1010T>C & 1019delA & 1022A>T & 1023_1024insG & 1038C>T	79A>G & 90T>C & 226A>G & 1002G>A & 1006G>C & 1010T>C & 1019delA & 1022A>T & 1023_1024insG & 1038C>T	80A>C & 89T>G & 93T>C & 1120T>C	A7V	None
QH5	S83L & D87N	None	S80I & E62K	S458A	None	H2R	None	541delA & 543G>T & 544_545insT & 548G>T & 550C>G & 552delT & 1171G>A & 1173delT & 1178C>T & 1211C>T & 1220G>A & 1229C>T & 1723G>A & 1865T>C & 2132T>G & 2794C>T & 2796T>C & 2799A>G & 2802G>A	76G>A & 80A>C & 89T>G & 1002G>A & 1006G>C & 1010T>C & 1019delA & 1022A>T & 1023_1024insG & 1038C>T	76G>A & 79A>G & 90T>C & 93C>T & 226A>G & 1002G>A & 1006G>C & 1010T>C & 1019delA & 1022A>T & 1023_1024insG & 1038C>T	76G>A & 80A>C & 89T>G & 1120T>C	A7V	None
QH6	S83L & D87N & D678E	None	S57T & S80I & E62K & D197E & K200N & D309E & L344R & D475E	None	None	None	None	1723G>A & 1725T>C & 1726C>G & 1727C>A & 1730C>T & 1733G>T & 1734G>C & 1735A>G & 2636C>T & 2794C>T & 2796T>C & 2799A>G & 2802G>A	80A>C	79A>G & 89G>T & 90T>C & 93C>T & 226A>G	80A>C & 1002A>G & 1006C>G & 1010C>T & 1018_1019insA & 1021T>A & 1023delG & 1038T>C & 1120T>C	None	None
QH7	None	None	E62K	None	None	D283G & Y358N	None	137T>A & 142A>T & 356G>A & 1723G>A & 2794C>T & 2796T>C & 2799A>G & 2802G>A	250A>T & 253A>T & 273T>A	79A>G & 80C>A & 89G>T & 90T>C & 93C>T & 226A>G & 250A>T & 253A>T & 273T>A	250A>T & 253A>T & 273T>A & 1002A>G & 1006C>G & 1010C>T & 1018_1019insA & 1021T>A & 1023delG & 1038T>C & 1120T>C	None	None
QH8	S83L & D87N & D678E	None	S57T & S80I & E62K & D197E & K200N & D309E & L344R & D475E	None	None	None	None	1723G>A & 1725T>C & 1726C>G & 1727C>A & 1730C>T & 1733G>T & 1734G>C & 1735A>G & 2636C>T & 2794C>T & 2796T>C & 2799A>G & 2802G>A	79G>T & 80A>C & 89T>G & 90C>A & 93T>C	79A>T & 90T>A & 226A>G	79G>T & 80A>C & 89T>G & 90C>A & 93T>C & 1002A>G & 1006C>G & 1010C>T & 1018_1019insA & 1021T>A & 1023delG & 1038T>C & 1120T>C	None	None
QH9	S83L & D87N & D678E	None	S57T & S80I & E62K & D197E & K200N & D309E & L344R & D475E	None	None	None	None	1211C>T & 1723G>A & 1725T>C & 1726C>G & 1727C>A & 1730C>T & 1733G>T & 1734G>C & 1735A>G & 2636C>T & 2794C>T & 2796T>C & 2799A>G & 2802G>A	80A>C & 89T>G	79A>G & 90T>C & 93C>T & 226A>G	80A>C & 89T>G & 1002A>G & 1006C>G & 1010C>T & 1018_1019insA & 1021T>A & 1023delG & 1038T>C & 1120T>C	None	None
S103	S83L & D87N	None	S80I & E62K	None	None	P220S & D283G & Y358N	None	137T>A & 142A>T & 356G>A & 542_543insA & 544C>A & 545T>G & 546T>C & 548G>A & 549G>T & 550_551insT & 1723G>A & 1865T>C & 2794C>T & 2796T>C & 2799A>G & 2802G>A	None	79A>G & 80C>A & 89G>T & 90T>C & 93C>T & 226A>G	1002A>G & 1006C>G & 1010C>T & 1018_1019insA & 1021T>A & 1023delG & 1038T>C & 1120T>C	None	None
S104	D678E	E703D	E62K	None	None	H2R & S138N & D283G	None	137T>A & 142A>T & 1220G>A & 1229C>T & 2205A>G & 2209G>C & 2215C>G & 2794C>T & 2796T>C & 2797T>C & 2799A>G & 2802G>A	None	79A>G & 80C>A & 89G>T & 90T>C & 93C>T & 226A>G	1120T>C	R24*	None
S147	None	None	E62K	None	None	None	None	541delA & 543G>T & 544_545insT & 548G>T & 550C>G & 552delT & 1211C>T & 1723G>A & 1865T>C & 2211A>G & 2794C>T & 2796T>C & 2799A>G & 2802G>A	80A>C & 89T>G & 93T>C & 1002G>A & 1006G>C & 1010T>C & 1019delA & 1022A>T & 1023_1024insG & 1038C>T	79A>G & 90T>C & 226A>G & 1002G>A & 1006G>C & 1010T>C & 1019delA & 1022A>T & 1023_1024insG & 1038C>T	80A>C & 89T>G & 93T>C & 1120T>C	None	None
S158	P872S	None	E62K & S589N	None	None	None	None	547A>C & 1211C>T	80A>C & 89T>G & 93T>C	79A>G & 90T>C & 226A>G	80A>C & 89T>G & 93T>C & 1120T>C	None	A1130V
S180	S83L & D87N	None	S80I & E62K	None	None	P220S & D283G & Y358N	None	137T>A & 142A>T & 356G>A & 542_543insA & 544C>A & 545T>G & 546T>C & 548G>A & 549G>T & 550_551insT & 1723G>A & 1865T>C & 2794C>T & 2796T>C & 2799A>G & 2802G>A	80A>C & 89T>G & 93T>C	79A>G & 90T>C & 226A>G	80A>C & 89T>G & 93T>C & 1002A>G & 1006C>G & 1010C>T & 1018_1019insA & 1021T>A & 1023delG & 1038T>C & 1120T>C	None	None
S181	S83L & D87N	None	S80I & E62K	None	None	H2R	None	1211C>T & 1723G>A & 1730C>T & 1865T>C & 2209G>C & 2215C>G	207C>T & 248C>T	79A>G & 80C>A & 89G>T & 90T>C & 93C>T & 207C>T & 226A>G & 248C>T	207C>T & 248C>T & 1002A>G & 1006C>G & 1010C>T & 1018_1019insA & 1021T>A & 1023delG & 1038T>C & 1120T>C	None	None
S182	None	None	E62K	None	None	H2R	None	264C>G & 356G>A & 357C>T & 1174T>G & 1723G>A & 1730C>T & 1865T>C & 2794C>T & 2796T>C & 2799A>G & 2802G>A	79G>A & 80A>C & 89T>G & 90C>T & 93T>C & 208T>C & 250A>T & 253A>T & 273T>A	208T>C & 226A>G & 250A>T & 253A>T & 273T>A	79G>A & 80A>C & 89T>G & 90C>T & 93T>C & 208T>C & 250A>T & 253A>T & 273T>A & 1002A>G & 1006C>G & 1010C>T & 1018_1019insA & 1021T>A & 1023delG & 1038T>C & 1120T>C	None	None
S191	None	None	E62K	None	None	None	None	1174T>G	79G>T & 80A>C & 89T>G & 90C>A & 93T>C	79A>T & 90T>A & 226A>G	79G>T & 80A>C & 89T>G & 90C>A & 93T>C & 1120T>C	None	None
S192	S83L & D87Y	None	S80I & E62K	S458A	G144S	D283G & Y358N	None	316C>T & 1174T>G & 2794C>T & 2796T>C & 2799A>G & 2802G>A	80A>C & 89T>G & 93T>C & 1002G>A & 1006G>C & 1010T>C & 1019delA & 1022A>T & 1023_1024insG & 1038C>T	79A>G & 90T>C & 226A>G & 1002G>A & 1006G>C & 1010T>C & 1019delA & 1022A>T & 1023_1024insG & 1038C>T	80A>C & 89T>G & 93T>C & 1120T>C	None	None
S193	D678E	None	E62K	None	None	H2R & D283G	None	137T>A & 142A>T & 356G>A & 357C>T & 540_541insC & 541A>T & 543G>T & 544C>T & 548G>T & 550C>G & 552delT & 1171G>A & 1173delT & 1178C>T & 1211C>T & 1220G>A & 1229C>T & 1723G>A & 1725T>C & 1726C>G & 1727C>A & 1730C>T & 1733G>T & 1734G>C & 1735A>G & 1865T>C & 2203T>G & 2211A>G	1002G>A & 1006G>C & 1010T>C & 1019delA & 1022A>T & 1023_1024insG & 1038C>T	79A>G & 80C>A & 89G>T & 90T>C & 93C>T & 226A>G & 1002G>A & 1006G>C & 1010T>C & 1019delA & 1022A>T & 1023_1024insG & 1038C>T	1120T>C	None	None
S194	None	None	A56T & E62K & A620V	None	None	D283G & Y358N	None	137T>A & 142A>T & 1743G>A & 1885T>C & 2814C>T & 2816T>C & 2819A>G & 2822G>A	79G>T & 80A>C & 89T>G & 90C>A & 93T>C	79A>T & 90T>A & 226A>G	79G>T & 80A>C & 89T>G & 90C>A & 93T>C & 1120T>C	None	None
S195	S83L	None	A56T & S80I & E62K & A414S & A620V	None	None	None	None	285G>A & 356G>A & 357C>T & 1174T>G & 1865T>C & 2794C>T & 2796T>C & 2799A>G & 2802G>A	None	79A>G & 80C>A & 89G>T & 90T>C & 93C>T & 226A>G	1002A>G & 1006C>G & 1010C>T & 1018_1019insA & 1021T>A & 1023delG & 1038T>C & 1120T>C	None	None
S196	S83L & D87N	E219K	A56T & S80I & E62K & A620V	None	None	None	G143E	1723G>A & 2794C>T & 2796T>C & 2799A>G & 2802G>A	None	79A>G & 80C>A & 89G>T & 90T>C & 93C>T & 226A>G	1002A>G & 1006C>G & 1010C>T & 1018_1019insA & 1021T>A & 1023delG & 1038T>C & 1120T>C	None	None
S198	S83L & D87Y	None	S80I & E62K	S458A	G144S	D283G & Y358N	None	316C>T & 1194T>G & 2814C>T & 2816T>C & 2819A>G & 2822G>A	80A>C & 89T>G & 93T>C & 1002G>A & 1006G>C & 1010T>C & 1019delA & 1022A>T & 1023_1024insG & 1038C>T	79A>G & 90T>C & 226A>G & 1002G>A & 1006G>C & 1010T>C & 1019delA & 1022A>T & 1023_1024insG & 1038C>T	80A>C & 89T>G & 93T>C & 1120T>C	None	None
S199	S83L	None	S80I & E62K	None	None	D283G & Y358N	None	285G>A & 541A>T & 1723G>A & 2794C>T & 2796T>C & 2799A>G & 2802G>A	76G>A & 80A>C & 89T>G & 250A>T & 253A>T & 273T>A	76G>A & 79A>G & 90T>C & 93C>T & 226A>G & 250A>T & 253A>T & 273T>A	76G>A & 80A>C & 89T>G & 250A>T & 253A>T & 273T>A & 1002A>G & 1006C>G & 1010C>T & 1018_1019insA & 1021T>A & 1023delG & 1038T>C & 1120T>C	None	None
S200	None	None	E62K	None	None	H2R	None	137T>A & 142A>T & 1174T>G & 1723G>A & 1730C>T & 1865T>C & 2794C>T & 2796T>C & 2799A>G & 2802G>A	79G>A & 80A>C & 89T>G & 90C>T & 93T>C & 208T>C & 250A>T & 253A>T & 273T>A	208T>C & 226A>G & 250A>T & 253A>T & 273T>A	79G>A & 80A>C & 89T>G & 90C>T & 93T>C & 208T>C & 250A>T & 253A>T & 273T>A & 1002A>G & 1006C>G & 1010C>T & 1018_1019insA & 1021T>A & 1023delG & 1038T>C & 1120T>C	None	None
S201	D678E & D741E	None	E62K	None	None	None	None	541delA & 543G>T & 544_545insT & 548G>T & 550C>G & 552delT & 1723G>A & 1725T>C & 1726C>G & 1727C>A & 1730C>T & 1733G>T & 1734G>C & 1735A>G & 1865T>C	80A>C & 89T>G & 93T>C	79A>G & 90T>C & 226A>G	80A>C & 89T>G & 93T>C & 1002A>G & 1006C>G & 1010C>T & 1018_1019insA & 1021T>A & 1023delG & 1038T>C & 1120T>C	None	None
S203	S83L	None	E62K	W168L	None	H2R	None	137T>A & 142A>T & 356G>A & 1211C>T & 1723G>A & 1730C>T & 1865T>C	None	79A>G & 80C>A & 89G>T & 90T>C & 93C>T & 226A>G	1002A>G & 1006C>G & 1010C>T & 1018_1019insA & 1021T>A & 1023delG & 1038T>C & 1120T>C	None	A981G
S204	None	None	E62K	None	None	H2R	None	1865T>C & 2794C>T & 2796T>C & 2799A>G & 2802G>A	80A>C & 89T>G & 93T>C	79A>G & 90T>C & 226A>G	80A>C & 89T>G & 93T>C & 1002A>G & 1006C>G & 1010C>T & 1018_1019insA & 1021T>A & 1023delG & 1038T>C & 1120T>C	None	None
S205	S83L	None	E62K	None	None	D283G & Y358N	None	137T>A & 142A>T & 1211C>T & 1723G>A & 1725T>C & 1726C>G & 1727C>A & 1730C>T & 1733G>T & 1734G>C & 1735A>G & 1865T>C & 2211A>G	76G>A & 250A>T & 253A>T & 273T>A	76G>A & 79A>G & 80C>A & 89G>T & 90T>C & 93C>T & 226A>G & 250A>T & 253A>T & 273T>A	76G>A & 250A>T & 253A>T & 273T>A & 1120T>C	None	None
S206	None	None	E62K	A243V	None	None	None	846T>C & 1171G>A & 1173delT & 1178C>T & 1211C>T & 1723G>A & 1730C>T & 1865T>C & 2132T>G	79G>A & 80A>C & 89T>G & 90C>T & 93T>C	226A>G	79G>A & 80A>C & 89T>G & 90C>T & 93T>C & 1002A>G & 1006C>G & 1010C>T & 1018_1019insA & 1021T>A & 1023delG & 1038T>C & 1120T>C	None	None
S208	S83L & D87Y	None	S80I & E62K	S458A	G144S	D283G & Y358N	None	316C>T & 1194T>G & 2814C>T & 2816T>C & 2819A>G & 2822G>A	80A>C & 89T>G & 93T>C & 1002G>A & 1006G>C & 1010T>C & 1019delA & 1022A>T & 1023_1024insG & 1038C>T	79A>G & 90T>C & 226A>G & 1002G>A & 1006G>C & 1010T>C & 1019delA & 1022A>T & 1023_1024insG & 1038C>T	80A>C & 89T>G & 93T>C & 1120T>C	None	None
S210	None	None	E62K	None	None	H2R	None	137T>A & 142A>T & 1174T>G & 1723G>A & 1730C>T & 1865T>C & 2794C>T & 2796T>C & 2799A>G & 2802G>A	79G>A & 80A>C & 89T>G & 90C>T & 93T>C & 208T>C & 250A>T & 253A>T & 273T>A	208T>C & 226A>G & 250A>T & 253A>T & 273T>A	79G>A & 80A>C & 89T>G & 90C>T & 93T>C & 208T>C & 250A>T & 253A>T & 273T>A & 1002A>G & 1006C>G & 1010C>T & 1018_1019insA & 1021T>A & 1023delG & 1038T>C & 1120T>C	None	None
S211	None	None	E62K	None	None	H2R & R198H	None	1211C>T & 1723G>A & 2132T>A & 2794C>T & 2796T>C & 2799A>G & 2802G>A	None	79A>G & 80C>A & 89G>T & 90T>C & 93C>T & 226A>G	1002A>G & 1006C>G & 1010C>T & 1018_1019insA & 1021T>A & 1023delG & 1038T>C & 1120T>C	None	None
S212	S83L	None	S57T & S80I & E62K & D197E & K200N & D309E & L344R & D475E	None	None	None	None	1723G>A & 1725T>C & 1726C>G & 1727C>A & 1730C>T & 1733G>T & 1734G>C & 1735A>G & 2794C>T & 2796T>C & 2799A>G & 2802G>A	None	79A>G & 80C>A & 89G>T & 90T>C & 93C>T & 226A>G	1002A>G & 1006C>G & 1010C>T & 1018_1019insA & 1021T>A & 1023delG & 1038T>C & 1120T>C	None	None
S47	S83L & D87N & A232V	None	S80I & E62K	None	None	None	None	541delA & 543G>T & 544_545insT & 548G>T & 550C>G & 552delT & 1211C>T & 1723G>A & 1865T>C & 2132T>A	1002G>A & 1006G>C & 1010T>C & 1019delA & 1022A>T & 1023_1024insG & 1038C>T	79A>G & 80C>A & 89G>T & 90T>C & 93C>T & 226A>G & 1002G>A & 1006G>C & 1010T>C & 1019delA & 1022A>T & 1023_1024insG & 1038C>T	1120T>C	None	None
S49	None	None	E62K	None	None	None	None	1097T>C	79G>A & 90C>T	80C>A & 89G>T & 93C>T & 226A>G	79G>A & 90C>T & 1002A>G & 1006C>G & 1010C>T & 1018_1019insA & 1021T>A & 1023delG & 1038T>C & 1120T>C	None	None
S51	S83L & D87N & D678E	None	S80I & E62K	None	None	H2R & D283G	None	815G>A & 817delT & 822C>T & 855C>T & 864G>A & 873C>T & 1367G>A & 1374C>T & 1509T>C & 1776T>A & 1847T>G & 1855A>G	1002G>A & 1006G>C & 1010T>C & 1019delA & 1022A>T & 1023_1024insG & 1038C>T	79A>G & 80C>A & 89G>T & 90T>C & 93C>T & 226A>G & 1002G>A & 1006G>C & 1010T>C & 1019delA & 1022A>T & 1023_1024insG & 1038C>T	1120T>C	None	None
S52	S83L & D87N & R237H & D678E	A618T & T653A & I663V	S80I & E62K	S458A	G144S	H2R & D283G	F4Y	137T>A & 142A>T & 264C>G & 356G>A & 547A>C & 1171G>A & 1173delT & 1178C>T & 1211C>T & 1483G>A & 1723G>A & 1725T>C & 1726C>G & 1727C>A & 1730C>T & 1733G>T & 1734G>C & 1735A>G & 1870C>G & 1870_1871insT & 1872_1873insC & 2205A>G & 2211A>T & 2794C>T & 2796T>C & 2799A>G & 2802G>A	76G>A & 79G>T & 80A>C & 89T>G & 90C>A	76G>A & 79A>T & 90T>A & 93C>T & 226A>G	76G>A & 79G>T & 80A>C & 89T>G & 90C>A & 1120T>C	R8C & L9R & R11Q & R24*	None
S56	None	None	E62K	None	None	H2R	None	1723G>A & 1730C>T	None	79A>G & 80C>A & 89G>T & 90T>C & 93C>T & 226A>G	1002A>G & 1006C>G & 1010C>T & 1018_1019insA & 1021T>A & 1023delG & 1038T>C & 1120T>C	None	None
S57	None	None	E62K	M324V	None	H2R	None	1508T>C & 2456A>G	None	79A>G & 80C>A & 89G>T & 90T>C & 93C>T & 226A>G	1002A>G & 1006C>G & 1010C>T & 1018_1019insA & 1021T>A & 1023delG & 1038T>C & 1120T>C	None	None
S61	S83L	None	E62K	None	None	H2R	None	None	80A>C & 89T>G & 93T>C	79A>G & 90T>C & 226A>G	80A>C & 89T>G & 93T>C & 1002A>G & 1006C>G & 1010C>T & 1018_1019insA & 1021T>A & 1023delG & 1038T>C & 1120T>C	None	None
S67	S83L & D678E & D741E	None	E62K	R378C	None	None	A271V	547A>C & 1723G>A & 1865T>C	80A>C & 89T>G & 93T>C & 213G>A	79A>G & 90T>C & 213G>A & 226A>G	80A>C & 89T>G & 93T>C & 213G>A & 1002A>G & 1006C>G & 1010C>T & 1018_1019insA & 1021T>A & 1023delG & 1038T>C & 1120T>C	None	None
S70	N652H	None	E62K	None	None	None	None	137T>A & 142A>T & 866T>C & 1191G>A & 1193delT & 1198C>T	None	79A>G & 80C>A & 89G>T & 90T>C & 93C>T & 226A>G	1120T>C	None	None
S72	D678E	None	E62K	None	None	H2R & D283G	None	356G>A & 540_541insC & 541A>T & 543G>T & 544C>T & 548G>T & 550C>G & 552delT & 1171G>A & 1173delT & 1178C>T & 1211C>T & 1220G>A & 1229C>T & 1723G>A & 2211A>G	1002G>A & 1006G>C & 1010T>C & 1019delA & 1022A>T & 1023_1024insG & 1038C>T	79A>G & 80C>A & 89G>T & 90T>C & 93C>T & 226A>G & 1002G>A & 1006G>C & 1010T>C & 1019delA & 1022A>T & 1023_1024insG & 1038C>T	1120T>C	None	None
S73	None	None	E62K	None	None	D283G & Y358N	None	1211C>T & 1220G>A & 1229C>T & 1723G>A & 1725T>C & 1726C>G & 1727C>A & 1730C>T & 1733G>T & 1734G>C & 1735A>G	80A>C & 89T>G & 250A>T & 253A>T & 273T>A	79A>G & 90T>C & 93C>T & 226A>G & 250A>T & 253A>T & 273T>A	80A>C & 89T>G & 250A>T & 253A>T & 273T>A & 1120T>C	None	None
S75	S83L & D87N	E219K	A56T & S80I & E62K & A620V	None	None	None	None	1171G>A & 1173delT & 1178C>T & 1211C>T & 1723G>A & 2132T>A & 2794C>T & 2796T>C & 2799A>G & 2802G>A	None	79A>G & 80C>A & 89G>T & 90T>C & 93C>T & 226A>G	1002A>G & 1006C>G & 1010C>T & 1018_1019insA & 1021T>A & 1023delG & 1038T>C & 1120T>C	None	None
S77	S83L	E185D & A618T & E703D	E62K & N385D & P401S	None	None	H2R & T246I & D282N & D283G	None	137T>A & 142A>T & 356G>A & 1171G>A & 1173delT & 1178C>T & 1211C>T & 1229C>T & 1723G>A & 1730C>T & 1870C>G & 1870_1871insT & 1872_1873insC & 2205A>G & 2209G>C & 2211A>G & 2215C>G	None	79A>G & 80C>A & 89G>T & 90T>C & 93C>T & 226A>G	1002A>G & 1006C>G & 1010C>T & 1018_1019insA & 1021T>A & 1023delG & 1038T>C & 1120T>C	V13F & R24*	None
S78	D678E	None	E62K	None	None	H2R & D283G	None	356G>A & 540_541insC & 541A>T & 543G>T & 544C>T & 548G>T & 550C>G & 552delT & 1171G>A & 1173delT & 1178C>T & 1211C>T & 1220G>A & 1229C>T & 1723G>A & 2211A>G	1002G>A & 1006G>C & 1010T>C & 1019delA & 1022A>T & 1023_1024insG & 1038C>T	79A>G & 80C>A & 89G>T & 90T>C & 93C>T & 226A>G & 1002G>A & 1006G>C & 1010T>C & 1019delA & 1022A>T & 1023_1024insG & 1038C>T	1120T>C	None	None
S79	S83L	None	E62K	None	None	H2R	None	None	80A>C & 89T>G & 93T>C	79A>G & 90T>C & 226A>G	80A>C & 89T>G & 93T>C & 1002A>G & 1006C>G & 1010C>T & 1018_1019insA & 1021T>A & 1023delG & 1038T>C & 1120T>C	None	None
S82	S83L & D87N	None	A56T & S80I & E62K & R365H & A620V	None	None	D283G & Y358N	None	1211C>T & 1723G>A & 1730C>T & 1870C>G & 1870_1871insT & 1872_1873insC & 2636C>T	1002G>A & 1006G>C & 1010T>C & 1019delA & 1022A>T & 1023_1024insG & 1038C>T	79A>G & 80C>A & 89G>T & 90T>C & 93C>T & 226A>G & 1002G>A & 1006G>C & 1010T>C & 1019delA & 1022A>T & 1023_1024insG & 1038C>T	1120T>C	None	None
S87	None	E85D	E62K & G449S & G579R	None	None	H2R & P220S & D283G & Y358N	None	137T>A & 142A>T & 1171G>A & 1173delT & 1178C>T & 1211C>T & 1220G>A & 1229C>T & 1723G>A & 1725T>C & 1726C>G & 1727C>A & 1730C>T & 1733G>T & 1734G>C & 1735A>G & 1865T>C & 2203T>G & 2794C>T & 2796T>C & 2799A>G & 2802G>A	250A>T & 253A>T & 273T>A	79A>G & 80C>A & 89G>T & 90T>C & 93C>T & 226A>G & 250A>T & 253A>T & 273T>A	250A>T & 253A>T & 273T>A & 1002A>G & 1006C>G & 1010C>T & 1018_1019insA & 1021T>A & 1023delG & 1038T>C & 1120T>C	None	None
S88	None	E85D	E62K & G449S & G579R	None	None	H2R & P220S & D283G & Y358N	None	137T>A & 142A>T & 1171G>A & 1173delT & 1178C>T & 1211C>T & 1220G>A & 1229C>T & 1723G>A & 1725T>C & 1726C>G & 1727C>A & 1730C>T & 1733G>T & 1734G>C & 1735A>G & 1865T>C & 2203T>G & 2794C>T & 2796T>C & 2799A>G & 2802G>A & 2844G>A	250A>T & 253A>T & 273T>A	79A>G & 80C>A & 89G>T & 90T>C & 93C>T & 226A>G & 250A>T & 253A>T & 273T>A	250A>T & 253A>T & 273T>A & 1002A>G & 1006C>G & 1010C>T & 1018_1019insA & 1021T>A & 1023delG & 1038T>C & 1120T>C	None	None
S89	S83L & D87N & R596C & A828T	None	S80I & E62K	None	L190V	D283G & Y358N	None	137T>A & 142A>T & 542_543insA & 544C>A & 545T>G & 546T>C & 548G>A & 549G>T & 550_551insT & 1211C>T & 1220G>A & 1229C>T & 1865T>C & 2211A>G & 2794C>T & 2796T>C & 2799A>G & 2802G>A	250A>T & 253A>T & 273T>A	79A>G & 80C>A & 89G>T & 90T>C & 93C>T & 226A>G & 250A>T & 253A>T & 273T>A	250A>T & 253A>T & 273T>A & 1120T>C	None	None
S91	None	None	E62K	None	None	None	None	547A>C & 1174T>G & 1723G>A & 1730C>T & 1869_1870insG & 1870C>T & 1872_1873insC & 2794C>T & 2796T>C & 2799A>G & 2802G>A	82G>A & 1002G>A & 1006G>C & 1010T>C & 1019delA & 1022A>T & 1023_1024insG & 1038C>T	79A>G & 80C>A & 82G>A & 89G>T & 90T>C & 93C>T & 226A>G & 1002G>A & 1006G>C & 1010T>C & 1019delA & 1022A>T & 1023_1024insG & 1038C>T	82G>A & 1120T>C	None	None
S95	S83L & D87N & R596C & A828T	None	S80I & E62K	None	L190V	D283G & Y358N	None	137T>A & 142A>T & 542_543insA & 544C>A & 545T>G & 546T>C & 548G>A & 549G>T & 550_551insT & 1211C>T & 1220G>A & 1229C>T & 1865T>C & 2211A>G & 2794C>T & 2796T>C & 2799A>G & 2802G>A	80A>C & 250A>T & 253A>T & 273T>A	79A>G & 89G>T & 90T>C & 93C>T & 226A>G & 250A>T & 253A>T & 273T>A	80A>C & 250A>T & 253A>T & 273T>A & 1120T>C	None	None
S98	None	E85D	E62K & G449S & G579R	None	None	H2R & P220S & D283G & Y358N	None	137T>A & 142A>T & 1171G>A & 1173delT & 1178C>T & 1211C>T & 1220G>A & 1229C>T & 1723G>A & 1725T>C & 1726C>G & 1727C>A & 1730C>T & 1733G>T & 1734G>C & 1735A>G & 1865T>C & 2203T>G & 2794C>T & 2796T>C & 2799A>G & 2802G>A & 2844G>A	250A>T & 253A>T & 273T>A	79A>G & 80C>A & 89G>T & 90T>C & 93C>T & 226A>G & 250A>T & 253A>T & 273T>A	250A>T & 253A>T & 273T>A & 1002A>G & 1006C>G & 1010C>T & 1018_1019insA & 1021T>A & 1023delG & 1038T>C & 1120T>C	None	None
S99	None	T683S	E62K	None	None	D283G & Y358N	None	137T>A & 142A>T & 313G>A & 542_543insA & 544C>A & 545T>G & 546T>C & 548G>A & 549G>T & 550_551insT & 1723G>A & 2794C>T & 2796T>C & 2799A>G & 2802G>A	1002G>A & 1006G>C & 1010T>C & 1019delA & 1022A>T & 1023_1024insG & 1038C>T	79A>G & 80C>A & 89G>T & 90T>C & 93C>T & 226A>G & 1002G>A & 1006G>C & 1010T>C & 1019delA & 1022A>T & 1023_1024insG & 1038C>T	1120T>C	None	None
SAX11	S83L & D87N	None	S80I & E62K	None	None	None	K279*	1211C>T & 1723G>A & 1868_1869insC & 1872_1873insG & 2794C>T & 2796T>C & 2799A>G & 2802G>A	None	79A>G & 80C>A & 89G>T & 90T>C & 93C>T & 226A>G	1120T>C	None	None
SAX15	S83L & D87Y	None	S80I & E62K	S458A	G144S	D283G & Y358N	None	137T>A & 142A>T & 1174T>G & 2794C>T & 2796T>C & 2799A>G & 2802G>A	80A>C & 89T>G & 93T>C & 1002G>A & 1006G>C & 1010T>C & 1019delA & 1022A>T & 1023_1024insG & 1038C>T	79A>G & 90T>C & 226A>G & 1002G>A & 1006G>C & 1010T>C & 1019delA & 1022A>T & 1023_1024insG & 1038C>T	80A>C & 89T>G & 93T>C & 1120T>C	None	None
SAX16	S83L & D87N	E219K	A56T & S80I & E62K & A620V	None	None	None	None	1723G>A & 2794C>T & 2796T>C & 2799A>G & 2802G>A	79G>A & 80A>C & 89T>G & 90C>T & 93T>C	226A>G	79G>A & 80A>C & 89T>G & 90C>T & 93T>C & 1002A>G & 1006C>G & 1010C>T & 1018_1019insA & 1021T>A & 1023delG & 1038T>C & 1120T>C	None	None
SAX2	S83L & D87N & A863T	None	S80I & E62K	L91F	None	D283G & Y358N	None	137T>A & 142A>T & 1211C>T & 1220G>A & 1723G>A & 1865T>C & 2211A>G	80A>C & 89T>G & 93T>C & 1002G>A & 1006G>C & 1010T>C & 1019delA & 1022A>T & 1023_1024insG & 1038C>T	79A>G & 90T>C & 226A>G & 1002G>A & 1006G>C & 1010T>C & 1019delA & 1022A>T & 1023_1024insG & 1038C>T	80A>C & 89T>G & 93T>C & 1120T>C	None	None
SAX21	None	None	E62K	T185A	None	H2R	None	137T>A & 142A>T & 350G>A & 356G>A & 357C>T & 1211C>T & 1723G>A & 1730C>T & 1865T>C & 2132T>G & 2794C>T & 2796T>C & 2799A>G & 2802G>A	80A>C & 89T>G & 93T>C & 183C>T	79A>G & 90T>C & 183C>T & 226A>G	80A>C & 89T>G & 93T>C & 183C>T & 1002A>G & 1006C>G & 1010C>T & 1018_1019insA & 1021T>A & 1023delG & 1038T>C & 1120T>C	None	None
SAX22	S83L & D87N & D678E	None	S80I & E62K	S458A	None	None	F4Y	1211C>T & 1723G>A & 2132T>A & 2794C>T & 2796T>C & 2799A>G & 2802G>A	None	79A>G & 80C>A & 89G>T & 90T>C & 93C>T & 226A>G	1002A>G & 1006C>G & 1010C>T & 1018_1019insA & 1021T>A & 1023delG & 1038T>C & 1120T>C	None	None
SAX32	S83L & D87N	None	E84K & E62K	None	V75I	D283G & Y358N	None	1171G>A & 1178C>T & 1506T>C & 1507C>T & 1723G>A & 1726C>T & 1727C>G & 1865T>C & 2132T>G & 2794C>T & 2796T>C & 2799A>G & 2802G>A	76G>A & 250A>T & 253A>T & 273T>A	76G>A & 79A>G & 80C>A & 89G>T & 90T>C & 93C>T & 226A>G & 250A>T & 253A>T & 273T>A	76G>A & 250A>T & 253A>T & 273T>A & 1002A>G & 1006C>G & 1010C>T & 1018_1019insA & 1021T>A & 1023delG & 1038T>C & 1120T>C	None	None
SAX35	S83L & D87N & D678E	D622N	S80I & E84G & E62K	None	None	H2R & D283G & Y358N	None	376G>A & 560_561insC & 561A>T & 563G>T & 564C>T & 568G>T & 570C>G & 572delT & 1191G>A & 1193delT & 1198C>T & 1231C>T & 1240G>A & 1249C>T & 1743G>A & 1745T>C & 1746C>G & 1747C>A & 1750C>T & 1753G>T & 1754G>C & 1755A>G & 1885T>C & 2152T>A & 2814C>T & 2816T>C & 2819A>G & 2822G>A	1002G>A & 1006G>C & 1010T>C & 1019delA & 1022A>T & 1023_1024insG & 1038C>T	79A>G & 80C>A & 89G>T & 90T>C & 93C>T & 226A>G & 1002G>A & 1006G>C & 1010T>C & 1019delA & 1022A>T & 1023_1024insG & 1038C>T	1120T>C	None	None
SAX4	S83L & D87N	E219K	A56T & S80I & E62K & A620V	None	None	None	None	1723G>A & 2794C>T & 2796T>C & 2799A>G & 2802G>A	None	79A>G & 80C>A & 89G>T & 90T>C & 93C>T & 226A>G	1002A>G & 1006C>G & 1010C>T & 1018_1019insA & 1021T>A & 1023delG & 1038T>C & 1120T>C	None	None
SAX40	D678E	None	E62K & D475E & Q695L	None	None	H2R & D283G	None	137T>A & 142A>T & 264C>G & 356G>A & 547A>C & 1171G>A & 1173delT & 1178C>T & 1211C>T & 1723G>A & 1725T>C & 1726C>G & 1727C>A & 1730C>T & 1733G>T & 1734G>C & 1735A>G & 2205A>G & 2211A>T & 2794C>T & 2796T>C & 2797T>C & 2799A>G & 2802G>A	79G>A & 80A>C & 89T>G & 90C>T & 93T>C & 1002G>A & 1006G>C & 1010T>C & 1019delA & 1022A>T & 1023_1024insG & 1038C>T	226A>G & 1002G>A & 1006G>C & 1010T>C & 1019delA & 1022A>T & 1023_1024insG & 1038C>T	79G>A & 80A>C & 89T>G & 90C>T & 93T>C & 1120T>C	R24*	None
SAX6	S83L & D87N	None	A56T & S80I & E62K & R365H & A620V	None	None	D283G & Y358N	None	1211C>T & 1723G>A & 1730C>T & 1870C>G & 1870_1871insT & 1872_1873insC & 2636C>T	1002G>A & 1006G>C & 1010T>C & 1019delA & 1022A>T & 1023_1024insG & 1038C>T	79A>G & 80C>A & 89G>T & 90T>C & 93C>T & 226A>G & 1002G>A & 1006G>C & 1010T>C & 1019delA & 1022A>T & 1023_1024insG & 1038C>T	1120T>C	None	None
SC1	S83L & D87N	None	S80I & E62K	S458A	G144S	D283G & Y358N	None	137T>A & 142A>T & 1211C>T & 1723G>A & 1726C>G & 1727C>A & 1728C>T & 1730C>T & 1731G>A & 1733G>T & 1734G>C & 2203T>G & 2794C>T & 2796T>C & 2799A>G & 2802G>A	1002G>A & 1006G>C & 1010T>C & 1019delA & 1022A>T & 1023_1024insG & 1038C>T	79A>G & 80C>A & 89G>T & 90T>C & 93C>T & 226A>G & 1002G>A & 1006G>C & 1010T>C & 1019delA & 1022A>T & 1023_1024insG & 1038C>T	1120T>C	None	None
SC10	S83L & D87N	E219K	A56T & S80I & E62K & A620V	None	None	None	None	1723G>A & 2794C>T & 2796T>C & 2799A>G & 2802G>A	None	79A>G & 80C>A & 89G>T & 90T>C & 93C>T & 226A>G	1002A>G & 1006C>G & 1010C>T & 1018_1019insA & 1021T>A & 1023delG & 1038T>C & 1120T>C	None	None
SC3	S83L & D87N	E219K	A56T & S80I & E62K & A620V	None	None	None	None	1723G>A & 2794C>T & 2796T>C & 2799A>G & 2802G>A	None	79A>G & 80C>A & 89G>T & 90T>C & 93C>T & 226A>G	1002A>G & 1006C>G & 1010C>T & 1018_1019insA & 1021T>A & 1023delG & 1038T>C & 1120T>C	None	None
SC4	S83L & D87N	None	S80I & E62K	L416F	None	None	None	1171G>A & 1173delT & 1178C>T & 1211C>T & 1723G>A & 1868_1869insC & 1872_1873insG & 2794C>T & 2796T>C & 2799A>G & 2802G>A	None	79A>G & 80C>A & 89G>T & 90T>C & 93C>T & 226A>G	1002A>G & 1006C>G & 1010C>T & 1018_1019insA & 1021T>A & 1023delG & 1038T>C & 1120T>C	None	None
SD1	S83L & D87N & D678E	None	S57T & S80I & E62K & D197E & K200N & D309E & L344R & D475E	None	None	None	None	137T>A & 142A>T & 547A>C & 1211C>T & 1723G>A & 1870C>G & 1870_1871insT & 1872_1873insC & 2794C>T & 2796T>C & 2799A>G & 2802G>A	48C>T & 80A>C & 89T>G & 93T>C & 1002G>A & 1006G>C & 1010T>C & 1019delA & 1022A>T & 1023_1024insG & 1038C>T	48C>T & 79A>G & 90T>C & 226A>G & 1002G>A & 1006G>C & 1010T>C & 1019delA & 1022A>T & 1023_1024insG & 1038C>T	48C>T & 80A>C & 89T>G & 93T>C & 1120T>C	None	None
SD10	S83L & D87N	None	S80I & E62K	None	None	P220S & D283G & Y358N	None	137T>A & 142A>T & 356G>A & 542_543insA & 544C>A & 545T>G & 546T>C & 548G>A & 549G>T & 550_551insT & 1723G>A & 2132T>A & 2794C>T & 2796T>C & 2799A>G & 2802G>A	76G>A & 250A>T & 253A>T & 273T>A	76G>A & 79A>G & 80C>A & 89G>T & 90T>C & 93C>T & 226A>G & 250A>T & 253A>T & 273T>A	76G>A & 250A>T & 253A>T & 273T>A & 1002A>G & 1006C>G & 1010C>T & 1018_1019insA & 1021T>A & 1023delG & 1038T>C & 1120T>C	None	None
SD11	S83L & D87N & D678E	None	S80I & E62K	S458A	None	None	F4Y	1211C>T & 1723G>A & 1868_1869insC & 1872_1873insG & 2132T>A & 2794C>T & 2796T>C & 2799A>G & 2802G>A	None	79A>G & 80C>A & 89G>T & 90T>C & 93C>T & 226A>G	1002A>G & 1006C>G & 1010C>T & 1018_1019insA & 1021T>A & 1023delG & 1038T>C & 1120T>C	None	None
SD12	S83L & D87N	None	A56T & S80I & E62K & R365H & A620V	None	None	None	None	1723G>A & 1730C>T & 2794C>T & 2796T>C & 2799A>G & 2802G>A	None	79A>G & 80C>A & 89G>T & 90T>C & 93C>T & 226A>G	1002A>G & 1006C>G & 1010C>T & 1018_1019insA & 1021T>A & 1023delG & 1038T>C & 1120T>C	None	None
SD15	S83L & D87N	None	S80I & E62K	S458A	G144S	D283G & Y358N	None	1723G>A	80A>C & 89T>G & 93T>C & 1002G>A & 1006G>C & 1010T>C & 1019delA & 1022A>T & 1023_1024insG & 1038C>T	79A>G & 90T>C & 226A>G & 1002G>A & 1006G>C & 1010T>C & 1019delA & 1022A>T & 1023_1024insG & 1038C>T	80A>C & 89T>G & 93T>C & 1120T>C	None	None
SD16	S83L & D87N	None	S80I & E62K	None	None	D283G & Y358N	None	137T>A & 142A>T & 542_543insA & 544C>A & 545T>G & 546T>C & 548G>A & 549G>T & 550_551insT & 1211C>T & 1231C>T & 1240G>A & 1249C>T & 1743G>A	76G>A	76G>A & 79A>G & 80C>A & 89G>T & 90T>C & 93C>T & 226A>G	76G>A & 1120T>C	None	None
SD2	S83L & D87N	None	S80I & E62K	None	None	P220S & D283G & Y358N	None	137T>A & 142A>T & 356G>A & 542_543insA & 544C>A & 545T>G & 546T>C & 548G>A & 549G>T & 550_551insT & 1723G>A & 1865T>C & 2794C>T & 2796T>C & 2799A>G & 2802G>A	80A>C & 89T>G & 93T>C & 250A>T & 253A>T & 273T>A	79A>G & 90T>C & 226A>G & 250A>T & 253A>T & 273T>A	80A>C & 89T>G & 93T>C & 250A>T & 253A>T & 273T>A & 1002A>G & 1006C>G & 1010C>T & 1018_1019insA & 1021T>A & 1023delG & 1038T>C & 1120T>C	None	None
SD21	D678E & D741E	None	E62K	A402T	None	None	None	547A>C & 1174T>G & 1723G>A & 1725T>C & 1726C>G & 1727C>A & 1730C>T & 1733G>T & 1734G>C & 1735A>G & 1865T>C & 2132T>A & 2794C>T & 2796T>C & 2799A>G & 2802G>A	80A>C & 89T>G & 90C>T & 93T>C	79A>G & 226A>G	80A>C & 89T>G & 90C>T & 93T>C & 1002A>G & 1006C>G & 1010C>T & 1018_1019insA & 1021T>A & 1023delG & 1038T>C & 1120T>C	None	None
SD23	None	None	E62K	None	None	H2R	None	1723G>A & 1730C>T & 1865T>C	None	133A>G	909A>G & 913C>G & 917C>T & 925_926insA & 928T>A & 930delG & 945T>C & 1027T>C	None	None
SD26	S83L	None	S80I & E62K	None	None	H2R	None	1723G>A & 1730C>T & 1865T>C & 2209G>C & 2215C>G & 2770G>T	80A>C & 89T>G & 93T>C	79A>G & 90T>C & 226A>G	80A>C & 89T>G & 93T>C & 1002A>G & 1006C>G & 1010C>T & 1018_1019insA & 1021T>A & 1023delG & 1038T>C & 1120T>C	None	None
SD28	S83L & D87Y & P872S	None	S80I & E62K	I464F	None	None	None	1322_1323insG & 1323C>T & 1325_1326insC & 1585T>A & 2247C>T & 2249T>C & 2252A>G & 2255G>A	None	79A>G & 80C>A & 89G>T & 90T>C & 93C>T & 226A>G	1002A>G & 1006C>G & 1010C>T & 1018_1019insA & 1021T>A & 1023delG & 1038T>C & 1120T>C	None	None
SD30	S83L & D87Y	None	S80I & E62K	None	None	D283G & Y358N	None	137T>A & 142A>T & 356G>A & 542_543insA & 544C>A & 545T>G & 546T>C & 548G>A & 549G>T & 550_551insT & 1723G>A & 2794C>T & 2796T>C & 2799A>G & 2802G>A	None	79A>G & 80C>A & 89G>T & 90T>C & 93C>T & 226A>G	1002A>G & 1006C>G & 1010C>T & 1018_1019insA & 1021T>A & 1023delG & 1038T>C & 1120T>C	None	None
SD35	S83L & D87Y	None	S80I & E62K	None	None	D283G & Y358N	None	137T>A & 142A>T & 356G>A & 542_543insA & 544C>A & 545T>G & 546T>C & 548G>A & 549G>T & 550_551insT & 1723G>A & 2794C>T & 2796T>C & 2799A>G & 2802G>A	None	79A>G & 80C>A & 89G>T & 90T>C & 93C>T & 226A>G	1002A>G & 1006C>G & 1010C>T & 1018_1019insA & 1021T>A & 1023delG & 1038T>C & 1120T>C	None	None
SD36	S83L & D87Y	None	S80I & E62K	None	None	D283G & Y358N	None	137T>A & 142A>T & 356G>A & 542_543insA & 544C>A & 545T>G & 546T>C & 548G>A & 549G>T & 550_551insT & 1723G>A & 2794C>T & 2796T>C & 2799A>G & 2802G>A	None	79A>G & 80C>A & 89G>T & 90T>C & 93C>T & 226A>G	1002A>G & 1006C>G & 1010C>T & 1018_1019insA & 1021T>A & 1023delG & 1038T>C & 1120T>C	None	None
SD37	S83L	None	S80I & E62K	None	None	D283G & Y358N	None	137T>A & 142A>T & 356G>A & 542_543insA & 544C>A & 545T>G & 546T>C & 548G>A & 549G>T & 550_551insT & 1723G>A & 2794C>T & 2796T>C & 2799A>G & 2802G>A	80A>C & 89T>G & 93T>C	79A>G & 90T>C & 226A>G	80A>C & 89T>G & 93T>C & 1002A>G & 1006C>G & 1010C>T & 1018_1019insA & 1021T>A & 1023delG & 1038T>C & 1120T>C	None	None
SD38	S83L & D87Y	None	S80I & E62K	None	None	D283G & Y358N	None	137T>A & 142A>T & 356G>A & 542_543insA & 544C>A & 545T>G & 546T>C & 548G>A & 549G>T & 550_551insT & 1723G>A & 2794C>T & 2796T>C & 2799A>G & 2802G>A	79G>A & 90C>T	80C>A & 89G>T & 93C>T & 226A>G	79G>A & 90C>T & 1002A>G & 1006C>G & 1010C>T & 1018_1019insA & 1021T>A & 1023delG & 1038T>C & 1120T>C	None	None
SD40	S83L	None	E62K	None	None	None	None	1723G>A & 1868_1869insC & 1872_1873insG & 2794C>T & 2796T>C & 2799A>G & 2802G>A	None	79A>G & 80C>A & 89G>T & 90T>C & 93C>T & 226A>G	1002A>G & 1006C>G & 1010C>T & 1018_1019insA & 1021T>A & 1023delG & 1038T>C & 1120T>C	None	None
SD5	S83L & D678E & D860N	None	E62K	None	None	H2R & V351I	None	137T>A & 142A>T & 264C>G & 356G>A & 540_541insC & 541A>T & 543G>T & 544C>T & 548G>T & 550C>G & 552delT & 1174T>G & 1211C>T & 1506T>C & 1507C>T & 1723G>A & 1865T>C	1002G>A & 1006G>C & 1007T>C & 1008T>C & 1010T>G & 1011C>T & 1018G>A & 1019A>C & 1021A>G & 1022A>G & 1023T>G & 1036A>G & 1038C>T	79A>G & 80C>A & 89G>T & 90T>C & 93C>T & 226A>G & 1002G>A & 1006G>C & 1007T>C & 1008T>C & 1010T>G & 1011C>T & 1018G>A & 1019A>C & 1021A>G & 1022A>G & 1023T>G & 1036A>G & 1038C>T	1007T>C & 1008T>C & 1010C>G & 1011C>T & 1018G>A & 1019G>C & 1020A>G & 1021T>G & 1022T>G & 1036A>G & 1120T>C	None	None
SD58	T611S & D678E	None	E62K & D387E & V500I	None	None	H2R & D283G & V351I	None	356G>A & 357C>T & 547A>C & 1171G>A & 1173delT & 1178C>T & 1211C>T & 1220G>A & 1229C>T & 1723G>A & 1865T>C & 2203T>G & 2211A>G	1002G>A & 1006G>C & 1010T>C & 1019delA & 1022A>T & 1023_1024insG & 1038C>T	79A>G & 80C>A & 89G>T & 90T>C & 93C>T & 226A>G & 1002G>A & 1006G>C & 1010T>C & 1019delA & 1022A>T & 1023_1024insG & 1038C>T	1120T>C	None	None
SD7	S83L & P872S	None	S80I & E62K	None	None	None	None	137T>A & 142A>T & 1723G>A & 2203T>G & 2211A>G	80A>C & 89T>G & 93T>C	79A>G & 90T>C & 226A>G	80A>C & 89T>G & 93T>C & 1120T>C	None	None
SH22	S83L & D678E & D741E	None	S80I & E62K	A402T	None	None	None	547A>C & 1174T>G & 2794C>T & 2796T>C & 2799A>G & 2802G>A	79G>A & 80A>C & 89T>G & 90C>T & 93T>C	226A>G	79G>A & 80A>C & 89T>G & 90C>T & 93T>C & 1002A>G & 1006C>G & 1010C>T & 1018_1019insA & 1021T>A & 1023delG & 1038T>C & 1120T>C	None	D116N
SH30	None	None	E62K	None	None	D283G & P294L & Y358N	None	137T>A & 142A>T & 356G>A & 542_543insA & 544C>A & 545T>G & 546T>C & 548G>A & 549G>T & 550_551insT & 1723G>A & 1865T>C & 2794C>T & 2796T>C & 2799A>G & 2802G>A	250A>T & 253A>T & 273T>A	79A>G & 80C>A & 89G>T & 90T>C & 93C>T & 226A>G & 250A>T & 253A>T & 273T>A	250A>T & 253A>T & 273T>A & 1120T>C	None	None
SH36	None	H652R	E62K	None	None	D283G & Y358N	None	1173G>A & 1175T>C & 1176C>G & 1177C>A & 1180C>T & 1183G>T & 1184G>C & 1185A>G & 1315T>C & 2244C>T & 2246T>C & 2249A>G & 2252G>A	76G>A & 80A>C & 89T>G & 250A>T & 253A>T & 273T>A	76G>A & 79A>G & 90T>C & 93C>T & 226A>G & 250A>T & 253A>T & 273T>A	76G>A & 80A>C & 89T>G & 250A>T & 253A>T & 273T>A & 1120T>C	None	None
SH40	D678E	None	E62K	None	None	None	None	859G>A & 861delT & 866C>T & 899C>T	80A>C & 89T>G & 93T>C	79A>G & 90T>C & 226A>G	80A>C & 89T>G & 93T>C & 1002A>G & 1006C>G & 1010C>T & 1018_1019insA & 1021T>A & 1023delG & 1038T>C & 1120T>C	None	None
SH41	None	None	E62K	None	None	None	None	1723G>A & 1868_1869insC & 1872_1873insG	79G>A & 80A>C & 89T>G & 90C>T & 93T>C	226A>G	79G>A & 80A>C & 89T>G & 90C>T & 93T>C & 1002A>G & 1006C>G & 1010C>T & 1018_1019insA & 1021T>A & 1023delG & 1038T>C & 1120T>C	None	None
SH43	None	H652R	E62K	None	None	D283G & Y358N	None	137T>A & 142A>T & 1171G>A & 1173delT & 1178C>T & 1723G>A & 1725T>C & 1726C>G & 1727C>A & 1730C>T & 1733G>T & 1734G>C & 1735A>G & 1865T>C & 2794C>T & 2796T>C & 2799A>G & 2802G>A	76G>A & 80A>C & 89T>G & 250A>T & 253A>T & 273T>A	76G>A & 79A>G & 90T>C & 93C>T & 226A>G & 250A>T & 253A>T & 273T>A	76G>A & 80A>C & 89T>G & 250A>T & 253A>T & 273T>A & 1120T>C	None	None
SH44	D678E	None	E62K	None	None	None	None	137T>A & 142A>T & 168G>A & 312G>A & 547A>C & 1211C>T	80A>C & 89T>G & 93T>C	79A>G & 90T>C & 226A>G	80A>C & 89T>G & 93T>C & 1002A>G & 1006C>G & 1010C>T & 1018_1019insA & 1021T>A & 1023delG & 1038T>C & 1120T>C	None	None
SH46	None	None	E62K	None	None	None	None	316C>T & 1171G>A & 1173delT & 1178C>T & 1211C>T & 1220G>A & 1229C>T & 1723G>A & 1725T>C & 1726C>G & 1727C>A & 1730C>T & 1733G>T & 1734G>C & 1735A>G & 1868_1869insC & 1872_1873insG & 2794C>T & 2796T>C & 2799A>G & 2802G>A	79G>A & 80A>C & 89T>G & 90C>T & 93T>C	226A>G	79G>A & 80A>C & 89T>G & 90C>T & 93T>C & 1002A>G & 1006C>G & 1010C>T & 1018_1019insA & 1021T>A & 1023delG & 1038T>C & 1120T>C	None	None
SH47	None	None	E62K	None	G144S	D283G & Y358N	None	137T>A & 142A>T & 1211C>T & 1220G>A & 1229C>T & 1723G>A & 2203T>G & 2794C>T & 2796T>C & 2799A>G & 2802G>A	250A>T & 253A>T & 273T>A	79A>G & 80C>A & 89G>T & 90T>C & 93C>T & 226A>G & 250A>T & 253A>T & 273T>A	250A>T & 253A>T & 273T>A & 1002A>G & 1006C>G & 1010C>T & 1018_1019insA & 1021T>A & 1023delG & 1038T>C & 1120T>C	None	None
SH48	T611S & D678E	None	E62K	None	None	None	None	1211C>T & 1723G>A & 1725T>C & 1726C>G & 1727C>A & 1730C>T & 1733G>T & 1734G>C & 1735A>G & 1865T>C	None	79A>G & 80C>A & 89G>T & 90T>C & 93C>T & 226A>G	1002A>G & 1006C>G & 1010C>T & 1018_1019insA & 1021T>A & 1023delG & 1038T>C & 1120T>C	None	None
SH50	None	None	E62K	None	None	None	None	316C>T & 1171G>A & 1173delT & 1178C>T & 1211C>T & 1220G>A & 1229C>T & 1723G>A & 1725T>C & 1726C>G & 1727C>A & 1730C>T & 1733G>T & 1734G>C & 1735A>G & 1868_1869insC & 1872_1873insG & 2794C>T & 2796T>C & 2799A>G & 2802G>A	None	79A>G & 80C>A & 89G>T & 90T>C & 93C>T & 226A>G	1002A>G & 1006C>G & 1010C>T & 1018_1019insA & 1021T>A & 1023delG & 1038T>C & 1120T>C	None	None
SH51	S83L & D87N	None	A56T & S80I & E62K	S458A	None	D283G & Y358N	None	1723G>A & 1865T>C & 2211A>G & 2794C>T & 2796T>C & 2799A>G & 2802G>A	1002G>A & 1006G>C & 1010T>C & 1019delA & 1022A>T & 1023_1024insG & 1038C>T	79A>G & 80C>A & 89G>T & 90T>C & 93C>T & 226A>G & 1002G>A & 1006G>C & 1010T>C & 1019delA & 1022A>T & 1023_1024insG & 1038C>T	1120T>C	None	None
SH52	S83L & D87N & A863V	S492N & A618T	S80I & E62K	S458A	None	H2R & D283G	None	277delA & 279G>T & 282_283insA & 284G>T & 286C>G & 288delT & 907G>A & 914C>T & 947C>T & 956G>A & 965C>T & 1242T>C & 1243C>T & 1459G>A & 1461T>C & 1462C>G & 1463C>A & 1466C>T & 1469G>T & 1470G>C & 1471A>G & 2530C>T & 2532T>C & 2535A>G & 2538G>A	80A>C & 89T>G & 183C>T & 1002G>A & 1006G>C & 1010T>C & 1019delA & 1022A>T & 1023_1024insG & 1038C>T	79A>G & 90T>C & 93C>T & 183C>T & 226A>G & 1002G>A & 1006G>C & 1010T>C & 1019delA & 1022A>T & 1023_1024insG & 1038C>T	80A>C & 89T>G & 183C>T & 1120T>C	R24*	None
SH53	None	None	E62K	None	G144S	D283G & Y358N	None	137T>A & 142A>T & 1211C>T & 1220G>A & 1229C>T & 1723G>A & 2203T>G & 2794C>T & 2796T>C & 2799A>G & 2802G>A	250A>T & 253A>T & 273T>A	79A>G & 80C>A & 89G>T & 90T>C & 93C>T & 226A>G & 250A>T & 253A>T & 273T>A	250A>T & 253A>T & 273T>A & 1002A>G & 1006C>G & 1010C>T & 1018_1019insA & 1021T>A & 1023delG & 1038T>C & 1120T>C	None	None
SH55	None	None	E62K	None	G144S	D283G & Y358N	None	137T>A & 142A>T & 1211C>T & 1220G>A & 1229C>T & 1723G>A & 2203T>G & 2794C>T & 2796T>C & 2799A>G & 2802G>A	250A>T & 253A>T & 273T>A	79A>G & 80C>A & 89G>T & 90T>C & 93C>T & 226A>G & 250A>T & 253A>T & 273T>A	250A>T & 253A>T & 273T>A & 1002A>G & 1006C>G & 1010C>T & 1018_1019insA & 1021T>A & 1023delG & 1038T>C & 1120T>C	None	None
SH56	S83L & D87N & A863V	S492N & A618T	S80I & E62K	S458A	None	H2R & D283G	None	137T>A & 142A>T & 316C>T & 356G>A & 541delA & 543G>T & 546_547insA & 548G>T & 550C>G & 552delT & 1211C>T & 1220G>A & 1229C>T & 1506T>C & 1507C>T & 1723G>A & 1725T>C & 1726C>G & 1727C>A & 1730C>T & 1733G>T & 1734G>C & 1735A>G & 2794C>T & 2796T>C & 2799A>G & 2802G>A	183C>T	79A>G & 80C>A & 89G>T & 90T>C & 93C>T & 183C>T & 226A>G	183C>T & 1120T>C	R24*	None
SH57	None	None	E62K	None	G144S	D283G & Y358N	None	137T>A & 142A>T & 1211C>T & 1220G>A & 1229C>T & 1723G>A & 2203T>G & 2794C>T & 2796T>C & 2799A>G & 2802G>A	250A>T & 253A>T & 273T>A	79A>G & 80C>A & 89G>T & 90T>C & 93C>T & 226A>G & 250A>T & 253A>T & 273T>A	250A>T & 253A>T & 273T>A & 1002A>G & 1006C>G & 1010C>T & 1018_1019insA & 1021T>A & 1023delG & 1038T>C & 1120T>C	None	None
SH59	None	None	E62K	None	G144S	D283G & Y358N	None	137T>A & 142A>T & 1211C>T & 1220G>A & 1229C>T & 1723G>A & 2203T>G & 2794C>T & 2796T>C & 2799A>G & 2802G>A	250A>T & 253A>T & 273T>A	79A>G & 80C>A & 89G>T & 90T>C & 93C>T & 226A>G & 250A>T & 253A>T & 273T>A	250A>T & 253A>T & 273T>A & 1002A>G & 1006C>G & 1010C>T & 1018_1019insA & 1021T>A & 1023delG & 1038T>C & 1120T>C	None	None
SH60	T611S & D678E	None	E62K	None	None	None	None	1211C>T & 1723G>A & 1725T>C & 1726C>G & 1727C>A & 1730C>T & 1733G>T & 1734G>C & 1735A>G & 1865T>C	79G>A & 80A>C & 89T>G & 90C>T & 93T>C & 250A>T & 253A>T & 273T>A	226A>G & 250A>T & 253A>T & 273T>A	79G>A & 80A>C & 89T>G & 90C>T & 93T>C & 250A>T & 253A>T & 273T>A & 1002A>G & 1006C>G & 1010C>T & 1018_1019insA & 1021T>A & 1023delG & 1038T>C & 1120T>C	None	None
SH63	None	None	E62K	None	None	D283G & Y358N	A67V	137T>A & 142A>T & 542_543insA & 544C>A & 545T>G & 546T>C & 548G>A & 549G>T & 550_551insT & 1211C>T & 1723G>A & 2794C>T & 2796T>C & 2799A>G & 2802G>A	None	79A>G & 80C>A & 89G>T & 90T>C & 93C>T & 226A>G	1120T>C	None	None
SH68	None	None	E62K	None	None	D283G & Y358N	None	137T>A & 142A>T & 356G>A & 1174T>G & 1211C>T & 1723G>A & 1865T>C & 2794C>T & 2796T>C & 2799A>G & 2802G>A	250A>T & 253A>T & 273T>A	79A>G & 80C>A & 89G>T & 90T>C & 93C>T & 226A>G & 250A>T & 253A>T & 273T>A	250A>T & 253A>T & 273T>A & 1120T>C	None	None
SH7	None	H652R	E62K	None	None	D283G & Y358N	None	137T>A & 142A>T & 316C>T & 1723G>A & 1725T>C & 1726C>G & 1727C>A & 1730C>T & 1733G>T & 1734G>C & 1735A>G & 1865T>C & 2794C>T & 2796T>C & 2799A>G & 2802G>A	76G>A & 80A>C & 89T>G & 250A>T & 253A>T & 273T>A	76G>A & 79A>G & 90T>C & 93C>T & 226A>G & 250A>T & 253A>T & 273T>A	76G>A & 80A>C & 89T>G & 250A>T & 253A>T & 273T>A & 1120T>C	None	None
SH71	None	None	E62K	None	None	P294L	None	137T>A & 142A>T & 264C>G & 356G>A & 357C>T & 1174T>G & 1723G>A & 1730C>T	None	79A>G & 80C>A & 89G>T & 90T>C & 93C>T & 226A>G	1002A>G & 1006C>G & 1010C>T & 1018_1019insA & 1021T>A & 1023delG & 1038T>C & 1120T>C	None	None
SH77	None	None	E62K	None	None	D283G & Y358N	None	137T>A & 142A>T & 356G>A & 542_543insA & 544C>A & 545T>G & 546T>C & 548G>A & 549G>T & 550_551insT & 1174T>G & 1211C>T & 1723G>A & 1730C>T & 1865T>C & 2794C>T & 2796T>C & 2799A>G & 2802G>A	250A>T & 253A>T & 273T>A	79A>G & 80C>A & 89G>T & 90T>C & 93C>T & 226A>G & 250A>T & 253A>T & 273T>A	250A>T & 253A>T & 273T>A & 1120T>C	None	None
SH79	None	None	E62K	None	None	D283G & Y358N	None	137T>A & 142A>T & 356G>A & 542_543insA & 544C>A & 545T>G & 546T>C & 548G>A & 549G>T & 550_551insT & 1174T>G & 1211C>T & 1723G>A & 2794C>T & 2796T>C & 2799A>G & 2802G>A	250A>T & 253A>T & 273T>A	79A>G & 80C>A & 89G>T & 90T>C & 93C>T & 226A>G & 250A>T & 253A>T & 273T>A	250A>T & 253A>T & 273T>A & 1120T>C	None	None
SH90	None	None	E62K	None	None	D283G & Y358N	None	137T>A & 142A>T & 542_543insA & 544C>A & 545T>G & 546T>C & 548G>A & 549G>T & 550_551insT & 1723G>A & 1725T>C & 1726C>G & 1727C>A & 1730C>T & 1733G>T & 1734G>C & 1735A>G & 1865T>C & 2132T>G & 2203T>G & 2211A>G & 2794C>T & 2796T>C & 2799A>G & 2802G>A	80A>C & 89T>G & 1002G>A & 1006G>C & 1010T>C & 1019delA & 1022A>T & 1023_1024insG & 1038C>T	79A>G & 90T>C & 93C>T & 226A>G & 1002G>A & 1006G>C & 1010T>C & 1019delA & 1022A>T & 1023_1024insG & 1038C>T	80A>C & 89T>G & 1120T>C	None	None
SHB15	S83L & D87N	None	A56T & S80I & E62K & A620V	None	None	None	None	1211C>T & 2794C>T & 2796T>C & 2799A>G & 2802G>A	76G>A & 80A>C & 89T>G & 250A>T & 253A>T & 273T>A	76G>A & 79A>G & 90T>C & 93C>T & 226A>G & 250A>T & 253A>T & 273T>A	76G>A & 80A>C & 89T>G & 250A>T & 253A>T & 273T>A & 1002A>G & 1006C>G & 1010C>T & 1018_1019insA & 1021T>A & 1023delG & 1038T>C & 1120T>C	None	None
SHB6	None	None	E62K	None	None	None	None	137T>A & 142A>T & 264C>G & 356G>A & 357C>T & 1723G>A & 1730C>T & 1865T>C	79G>A & 80A>C & 89T>G & 90C>T & 93T>C	226A>G	79G>A & 80A>C & 89T>G & 90C>T & 93T>C & 1002A>G & 1006C>G & 1010C>T & 1018_1019insA & 1021T>A & 1023delG & 1038T>C & 1120T>C	None	None
SX52	S83L & D87N	None	S80I & E62K	None	None	D283G & Y358N	None	137T>A & 142A>T & 542_543insA & 544C>A & 545T>G & 546T>C & 548G>A & 549G>T & 550_551insT & 1211C>T & 1723G>A & 2636C>T	None	79A>G & 80C>A & 89G>T & 90T>C & 93C>T & 226A>G	1120T>C	None	None
SX54	D678E & D741E	S309N	E62K	A402T	None	None	None	547A>C & 1174T>G & 1723G>A & 1725T>C & 1726C>G & 1727C>A & 1730C>T & 1733G>T & 1734G>C & 1735A>G & 1865T>C & 2132T>A & 2794C>T & 2796T>C & 2799A>G & 2802G>A	79G>A & 80A>C & 89T>G & 90C>T & 93T>C	226A>G	79G>A & 80A>C & 89T>G & 90C>T & 93T>C & 1002A>G & 1006C>G & 1010C>T & 1018_1019insA & 1021T>A & 1023delG & 1038T>C & 1120T>C	None	None
TJ	None	None	E62K	None	None	None	None	1723G>A & 1868_1869insC & 1872_1873insG & 2132T>A & 2794C>T & 2796T>C & 2799A>G & 2802G>A	None	79A>G & 80C>A & 89G>T & 90T>C & 93C>T & 226A>G	1002A>G & 1006C>G & 1010C>T & 1018_1019insA & 1021T>A & 1023delG & 1038T>C & 1120T>C	None	None
TJ1	None	V765I	E62K	None	None	H2R	None	356G>A & 357C>T & 1174T>G	79G>A & 80A>C & 89T>G & 90C>T & 93T>C	226A>G	79G>A & 80A>C & 89T>G & 90C>T & 93T>C & 1002A>G & 1006C>G & 1010C>T & 1018_1019insA & 1021T>A & 1023delG & 1038T>C & 1120T>C	None	None
TJ10	None	V765I	E62K	None	None	H2R	None	264C>G & 356G>A & 357C>T & 1174T>G	79G>A & 80A>C & 89T>G & 90C>T & 93T>C	226A>G	79G>A & 80A>C & 89T>G & 90C>T & 93T>C & 1002A>G & 1006C>G & 1010C>T & 1018_1019insA & 1021T>A & 1023delG & 1038T>C & 1120T>C	None	None
TJ12	None	V765I	E62K	None	None	H2R	None	264C>G & 356G>A & 357C>T & 1174T>G	79G>A & 80A>C & 89T>G & 90C>T & 93T>C	226A>G	79G>A & 80A>C & 89T>G & 90C>T & 93T>C & 1002A>G & 1006C>G & 1010C>T & 1018_1019insA & 1021T>A & 1023delG & 1038T>C & 1120T>C	None	None
TJ15	None	V765I	E62K	None	None	H2R	None	1174T>G	79G>A & 80A>C & 89T>G & 90C>T & 93T>C	226A>G	79G>A & 80A>C & 89T>G & 90C>T & 93T>C & 1002A>G & 1006C>G & 1010C>T & 1018_1019insA & 1021T>A & 1023delG & 1038T>C & 1120T>C	None	None
TJ17	None	V765I	E62K	None	None	H2R	None	1174T>G	80A>C & 89T>G & 93T>C	79A>G & 90T>C & 226A>G	80A>C & 89T>G & 93T>C & 1002A>G & 1006C>G & 1010C>T & 1018_1019insA & 1021T>A & 1023delG & 1038T>C & 1120T>C	None	None
TJ3	None	V765I	E62K	None	None	H2R	None	264C>G & 356G>A & 357C>T & 1174T>G	80A>C & 89T>G & 93T>C	79A>G & 90T>C & 226A>G	80A>C & 89T>G & 93T>C & 1002A>G & 1006C>G & 1010C>T & 1018_1019insA & 1021T>A & 1023delG & 1038T>C & 1120T>C	None	None
TJ5	None	V765I	E62K	None	None	H2R	None	356G>A & 357C>T & 1174T>G	80A>C & 89T>G & 93T>C	79A>G & 90T>C & 226A>G	80A>C & 89T>G & 93T>C & 1002A>G & 1006C>G & 1010C>T & 1018_1019insA & 1021T>A & 1023delG & 1038T>C & 1120T>C	None	None
TJ50	S83L & D87N & D678E	None	S80I & E84G & E62K & D475E	None	G144S	D283G & Y358N	N49K	264C>G & 356G>A & 1723G>A & 2211A>G & 2794C>T & 2796T>C & 2799A>G & 2802G>A	80A>C & 89T>G & 93T>C	79A>G & 90T>C & 226A>G	80A>C & 89T>G & 93T>C & 1002A>G & 1006C>G & 1010C>T & 1018_1019insA & 1021T>A & 1023delG & 1038T>C & 1120T>C	None	None
TJ8	None	V765I	E62K	None	None	H2R	None	137T>A & 142A>T & 264C>G & 1174T>G & 1211C>T	79G>A & 80A>C & 89T>G & 90C>T & 93T>C	226A>G	79G>A & 80A>C & 89T>G & 90C>T & 93T>C & 1002A>G & 1006C>G & 1010C>T & 1018_1019insA & 1021T>A & 1023delG & 1038T>C & 1120T>C	None	None
XD1	S83L	E185D & A618T & E703D	E62K & N385D & P401S	None	None	H2R & T246I & D282N & D283G	None	137T>A & 142A>T & 356G>A & 1171G>A & 1173delT & 1178C>T & 1211C>T & 1229C>T & 1723G>A & 1730C>T & 1870C>G & 1870_1871insT & 1872_1873insC & 2205A>G & 2209G>C & 2211A>G & 2215C>G & 2794C>T & 2796T>C & 2799A>G & 2802G>A	None	79A>G & 80C>A & 89G>T & 90T>C & 93C>T & 226A>G	1002A>G & 1006C>G & 1010C>T & 1018_1019insA & 1021T>A & 1023delG & 1038T>C & 1120T>C	V13F & R24*	None
XD100	None	None	E62K	None	None	None	None	None	80A>C & 89T>G & 93T>C & 1002G>A & 1006G>C & 1010T>C & 1022A>T & 1038C>T	79A>G & 90T>C & 226A>G & 1002G>A & 1006G>C & 1010T>C & 1022A>T & 1038C>T	80A>C & 89T>G & 93T>C & 1018_1019insA & 1023delG & 1120T>C	None	None
XD101	D678E	E703D	E62K	None	None	H2R & S138N & D283G	None	137T>A & 142A>T & 264C>G & 541delA & 543G>T & 544_545insT & 548G>T & 550C>G & 552delT & 2215C>G & 2794C>T & 2796T>C & 2797T>C & 2799A>G & 2802G>A	80A>C & 89T>G & 93T>C	79A>G & 90T>C & 226A>G	80A>C & 89T>G & 93T>C & 1120T>C	R24*	None
XD11	S83L & D87N	None	S80I & E62K	L416F	None	None	None	None	79G>A & 80A>C & 89T>G & 90C>T & 93T>C & 208T>C & 250A>T & 253A>T & 273T>A	208T>C & 226A>G & 250A>T & 253A>T & 273T>A	79G>A & 80A>C & 89T>G & 90C>T & 93T>C & 208T>C & 250A>T & 253A>T & 273T>A & 1002A>G & 1006C>G & 1010C>T & 1018_1019insA & 1021T>A & 1023delG & 1038T>C & 1120T>C	None	None
XD115	None	None	E62K	None	None	None	None	None	79G>T & 80A>C & 89T>G & 90C>A & 93T>C	79A>T & 90T>A & 226A>G	79G>T & 80A>C & 89T>G & 90C>A & 93T>C & 1002A>G & 1006C>G & 1010C>T & 1018_1019insA & 1021T>A & 1023delG & 1038T>C & 1120T>C	None	None
XD116	None	None	E62K	None	None	D283G & Y358N	None	1723G>A & 2794C>T & 2796T>C & 2799A>G & 2802G>A	None	79A>G & 80C>A & 89G>T & 90T>C & 93C>T & 226A>G	1120T>C	None	None
XD12	S83L & D87N & D678E	None	S80I & E62K	S458A	None	None	F4Y	None	None	79A>G & 80C>A & 89G>T & 90T>C & 93C>T & 226A>G	1002A>G & 1006C>G & 1010C>T & 1018_1019insA & 1021T>A & 1023delG & 1038T>C & 1120T>C	None	None
XD171	P872S	None	E62K & S589N	None	None	None	None	547A>C & 1211C>T & 2794C>T & 2796T>C & 2799A>G & 2802G>A	80A>C & 89T>G & 93T>C	79A>G & 90T>C & 226A>G	80A>C & 89T>G & 93T>C & 1120T>C	None	A1130V
XD2	S83L	None	S80I & E62K	None	None	D283G & Y358N	None	137T>A & 142A>T & 356G>A & 542_543insA & 544C>A & 545T>G & 546T>C & 548G>A & 549G>T & 550_551insT & 1723G>A & 2794C>T & 2796T>C & 2799A>G & 2802G>A	None	79A>G & 80C>A & 89G>T & 90T>C & 93C>T & 226A>G	1002A>G & 1006C>G & 1010C>T & 1018_1019insA & 1021T>A & 1023delG & 1038T>C & 1120T>C	None	None
XD20	S83L & D87N & D678E	None	S80I & E62K	S458A	None	None	F4Y	None	None	79A>G & 80C>A & 89G>T & 90T>C & 93C>T & 226A>G	1002A>G & 1006C>G & 1010C>T & 1018_1019insA & 1021T>A & 1023delG & 1038T>C & 1120T>C	None	None
XD23	N652H	None	E62K & R444S	None	None	None	None	541delA & 543G>T & 544_545insT & 548G>T & 550C>G & 552delT & 1211C>T & 1865T>C & 2794C>T & 2796T>C & 2799A>G & 2802G>A	80A>C & 89T>G & 93T>C	79A>G & 90T>C & 226A>G	80A>C & 89T>G & 93T>C & 1002A>G & 1006C>G & 1010C>T & 1018_1019insA & 1021T>A & 1023delG & 1038T>C & 1120T>C	None	None
XD24	S83L & D87N & D678E	None	S80I & E62K	S458A	None	None	F4Y	None	None	79A>G & 80C>A & 89G>T & 90T>C & 93C>T & 226A>G	1002A>G & 1006C>G & 1010C>T & 1018_1019insA & 1021T>A & 1023delG & 1038T>C & 1120T>C	None	None
XD25	S83L & D87N	None	S80I & E62K	None	None	D283G & Y358N	None	137T>A & 142A>T & 356G>A & 542_543insA & 544C>A & 545T>G & 546T>C & 548G>A & 549G>T & 550_551insT & 1722G>A & 1864T>C & 2210A>G & 2793C>T & 2795T>C & 2798A>G & 2801G>A	79G>A & 80A>C & 89T>G & 90C>T & 93T>C & 250A>T & 253A>T & 273T>A	226A>G & 250A>T & 253A>T & 273T>A	79G>A & 80A>C & 89T>G & 90C>T & 93T>C & 250A>T & 253A>T & 273T>A & 1002A>G & 1006C>G & 1010C>T & 1018_1019insA & 1021T>A & 1023delG & 1038T>C & 1120T>C	None	None
XD26	S83L & D87N	None	S80I & E62K	None	None	D283G & Y358N	None	137T>A & 142A>T & 356G>A & 542_543insA & 544C>A & 545T>G & 546T>C & 548G>A & 549G>T & 550_551insT & 1722G>A & 1864T>C & 2210A>G & 2793C>T & 2795T>C & 2798A>G & 2801G>A	79G>A & 80A>C & 89T>G & 90C>T & 93T>C & 250A>T & 253A>T & 273T>A	226A>G & 250A>T & 253A>T & 273T>A	79G>A & 80A>C & 89T>G & 90C>T & 93T>C & 250A>T & 253A>T & 273T>A & 1002A>G & 1006C>G & 1010C>T & 1018_1019insA & 1021T>A & 1023delG & 1038T>C & 1120T>C	None	None
XD3	S83L & D87N & D678E	None	S80I & E62K	S458A	None	None	F4Y	1191G>A & 1193delT & 1198C>T & 1231C>T & 1743G>A & 2814C>T & 2816T>C & 2817T>C & 2819A>G & 2822G>A	None	79A>G & 80C>A & 89G>T & 90T>C & 93C>T & 226A>G	1002A>G & 1006C>G & 1010C>T & 1018_1019insA & 1021T>A & 1023delG & 1038T>C & 1120T>C	None	None
XD33	S83L & D87N	None	S80I & E62K	L416F	None	None	None	None	None	79A>G & 80C>A & 89G>T & 90T>C & 93C>T & 226A>G	1002A>G & 1006C>G & 1010C>T & 1018_1019insA & 1021T>A & 1023delG & 1038T>C & 1120T>C	None	None
XD34	S83L & D87N	None	S80I & E62K	None	None	P220S & D283G & Y358N	None	137T>A & 142A>T & 356G>A & 542_543insA & 544C>A & 545T>G & 546T>C & 548G>A & 549G>T & 550_551insT & 1723G>A & 2794C>T & 2796T>C & 2799A>G & 2802G>A	79G>A & 90C>T	80C>A & 89G>T & 93C>T & 226A>G	79G>A & 90C>T & 1002A>G & 1006C>G & 1010C>T & 1018_1019insA & 1021T>A & 1023delG & 1038T>C & 1120T>C	None	None
XD35	S83L & D87N	None	S80I & E62K	L416F	None	None	None	264C>G & 541delA & 543G>T & 544_545insT & 548G>T & 550C>G & 552delT & 846T>C & 1171G>A & 1173delT & 1178C>T & 1211C>T & 1723G>A & 1865T>C & 2132T>G & 2794C>T & 2796T>C & 2799A>G & 2802G>A	None	79A>G & 80C>A & 89G>T & 90T>C & 93C>T & 226A>G	1002A>G & 1006C>G & 1010C>T & 1018_1019insA & 1021T>A & 1023delG & 1038T>C & 1120T>C	None	None
XD36	S83L & D87N	None	S80I & E62K	L416F	None	None	None	None	None	79A>G & 80C>A & 89G>T & 90T>C & 93C>T & 226A>G	1002A>G & 1006C>G & 1010C>T & 1018_1019insA & 1021T>A & 1023delG & 1038T>C & 1120T>C	None	None
XD37	S83L & D87N	E219K	A56T & S80I & E62K & A620V	None	None	None	None	1723G>A & 2132T>A & 2794C>T & 2796T>C & 2799A>G & 2802G>A	None	79A>G & 80C>A & 89G>T & 90T>C & 93C>T & 226A>G	1002A>G & 1006C>G & 1010C>T & 1018_1019insA & 1021T>A & 1023delG & 1038T>C & 1120T>C	None	None
XD38	None	None	E62K	None	None	D283G & Y358N	None	137T>A & 142A>T & 316C>T & 1171G>A & 1173delT & 1178C>T & 1211C>T & 1220G>A & 1229C>T & 1723G>A & 2794C>T & 2796T>C & 2799A>G & 2802G>A	None	79A>G & 80C>A & 89G>T & 90T>C & 93C>T & 226A>G	1120T>C	None	None
XD39	S83L & D87N	None	S80I & E62K	None	None	P220S & D283G & Y358N	None	137T>A & 142A>T & 356G>A & 542_543insA & 544C>A & 545T>G & 546T>C & 548G>A & 549G>T & 550_551insT & 1723G>A & 2794C>T & 2796T>C & 2799A>G & 2802G>A	None	79A>G & 80C>A & 89G>T & 90T>C & 93C>T & 226A>G	1002A>G & 1006C>G & 1010C>T & 1018_1019insA & 1021T>A & 1023delG & 1038T>C & 1120T>C	None	None
XD40	S83L & D87N	None	S80I & E62K	None	None	P220S & D283G & Y358N	None	137T>A & 142A>T & 356G>A & 542_543insA & 544C>A & 545T>G & 546T>C & 548G>A & 549G>T & 550_551insT & 1723G>A & 2794C>T & 2796T>C & 2799A>G & 2802G>A	79G>A & 90C>T	80C>A & 89G>T & 93C>T & 226A>G	79G>A & 90C>T & 1002A>G & 1006C>G & 1010C>T & 1018_1019insA & 1021T>A & 1023delG & 1038T>C & 1120T>C	None	None
XD86	None	E85D	E62K & G449S & G579R	None	None	H2R & P220S & D283G & Y358N	None	137T>A & 142A>T & 1171G>A & 1173delT & 1178C>T & 1211C>T & 1220G>A & 1229C>T & 1723G>A & 1725T>C & 1726C>G & 1727C>A & 1730C>T & 1733G>T & 1734G>C & 1735A>G & 1865T>C & 2203T>G & 2794C>T & 2796T>C & 2799A>G & 2802G>A	250A>T & 253A>T & 273T>A	79A>G & 80C>A & 89G>T & 90T>C & 93C>T & 226A>G & 250A>T & 253A>T & 273T>A	250A>T & 253A>T & 273T>A & 1002A>G & 1006C>G & 1010C>T & 1018_1019insA & 1021T>A & 1023delG & 1038T>C & 1120T>C	None	None
XD97	S83L & D87N	None	S80I & E62K	None	None	P220S & D283G & Y358N	None	None	None	79A>G & 80C>A & 89G>T & 90T>C & 93C>T & 226A>G	1002A>G & 1006C>G & 1010C>T & 1018_1019insA & 1021T>A & 1023delG & 1038T>C & 1120T>C	None	None
XJ12	None	H652R	E62K	None	None	D283G & Y358N	None	137T>A & 142A>T & 1723G>A & 1865T>C & 2794C>T & 2796T>C & 2799A>G & 2802G>A	76G>A & 80A>C & 89T>G & 250A>T & 253A>T & 273T>A	76G>A & 79A>G & 90T>C & 93C>T & 226A>G & 250A>T & 253A>T & 273T>A	76G>A & 80A>C & 89T>G & 250A>T & 253A>T & 273T>A & 1120T>C	None	None
XJ13	None	H652R	E62K	None	None	D283G & Y358N	None	137T>A & 142A>T & 1723G>A & 1865T>C & 2794C>T & 2796T>C & 2799A>G & 2802G>A	76G>A & 80A>C & 89T>G & 250A>T & 253A>T & 273T>A	76G>A & 79A>G & 90T>C & 93C>T & 226A>G & 250A>T & 253A>T & 273T>A	76G>A & 80A>C & 89T>G & 250A>T & 253A>T & 273T>A & 1120T>C	None	None
XJ15	None	None	E62K	None	None	None	None	None	None	79A>G & 80C>A & 89G>T & 90T>C & 93C>T & 226A>G	1002A>G & 1006C>G & 1010C>T & 1018_1019insA & 1021T>A & 1023delG & 1038T>C & 1120T>C	None	None
XJ17	S83L & D87N	None	S80R & E62K	S458T	None	E121K & Q234R & D283G & Y358N	P25L & K221Q & K279*	264C>G & 356G>A & 357C>T & 567delA & 569G>T & 570_571insT & 574G>T & 578delT & 1237C>T & 1749G>A & 1767C>T & 1891T>C & 2820C>T & 2822T>C & 2825A>G & 2828G>A	1002G>A & 1006G>C & 1010T>C & 1019delA & 1022A>T & 1023_1024insG & 1038C>T	79A>G & 80C>A & 89G>T & 90T>C & 93C>T & 226A>G & 1002G>A & 1006G>C & 1010T>C & 1019delA & 1022A>T & 1023_1024insG & 1038C>T	1120T>C	None	None
XJ26	S83L & D87N	None	S80I & E62K	S458A	None	D283G & Y358N	None	137T>A & 142A>T & 914G>A & 1723G>A & 2203T>G & 2794C>T & 2796T>C & 2799A>G & 2802G>A	80A>C & 250A>T & 253A>T & 273T>A & 1002G>A & 1006G>C & 1010T>C & 1019delA & 1022A>T & 1023_1024insG & 1038C>T	79A>G & 89G>T & 90T>C & 93C>T & 226A>G & 250A>T & 253A>T & 273T>A & 1002G>A & 1006G>C & 1010T>C & 1019delA & 1022A>T & 1023_1024insG & 1038C>T	80A>C & 250A>T & 253A>T & 273T>A & 1120T>C	None	E626K
XJ32	S83L & D87N & D678E	None	S80I & E62K	S458A	None	None	F4Y	1211C>T & 1723G>A & 1868_1869insC & 1872_1873insG & 2794C>T & 2796T>C & 2799A>G & 2802G>A	None	79A>G & 80C>A & 89G>T & 90T>C & 93C>T & 226A>G	1002A>G & 1006C>G & 1010C>T & 1018_1019insA & 1021T>A & 1023delG & 1038T>C & 1120T>C	None	None
XJ33	S83L & D87N	None	S80I & E62K	S458A	None	D283G & Y358N	None	137T>A & 142A>T & 914G>A & 1723G>A & 2203T>G & 2794C>T & 2796T>C & 2799A>G & 2802G>A	80A>C & 89T>G & 90C>T & 93T>C & 250A>T & 253A>T & 273T>A & 1002G>A & 1006G>C & 1010T>C & 1019delA & 1022A>T & 1023_1024insG & 1038C>T	79A>G & 226A>G & 250A>T & 253A>T & 273T>A & 1002G>A & 1006G>C & 1010T>C & 1019delA & 1022A>T & 1023_1024insG & 1038C>T	80A>C & 89T>G & 90C>T & 93T>C & 250A>T & 253A>T & 273T>A & 1120T>C	None	E626K
XJ35	S83L & D87N & D678E	None	S80I & E62K	S458A	None	D283G & Y358N	None	137T>A & 142A>T & 542_543insA & 544C>A & 545T>G & 546T>C & 548G>A & 549G>T & 550_551insT & 1211C>T & 1723G>A & 1865T>C & 2636C>T & 2794C>T & 2796T>C & 2799A>G & 2802G>A	80A>C & 89T>G & 90C>T & 93T>C	79A>G & 226A>G	80A>C & 89T>G & 90C>T & 93T>C & 1120T>C	None	None
XJ36	S83L & D87N	None	S80I & E62K	S458A	None	D283G & Y358N	None	137T>A & 142A>T & 914G>A & 1723G>A & 2203T>G & 2794C>T & 2796T>C & 2799A>G & 2802G>A	80A>C & 89T>G & 250A>T & 253A>T & 273T>A & 1002G>A & 1006G>C & 1010T>C & 1019delA & 1022A>T & 1023_1024insG & 1038C>T	79A>G & 90T>C & 93C>T & 226A>G & 250A>T & 253A>T & 273T>A & 1002G>A & 1006G>C & 1010T>C & 1019delA & 1022A>T & 1023_1024insG & 1038C>T	80A>C & 89T>G & 250A>T & 253A>T & 273T>A & 1120T>C	None	E626K
XJ39	S83L & D87N & D678E	None	S80I & E84G & E62K & D475E	None	G144S	D283G & Y358N	N49K	1745G>A & 2233A>G & 2816C>T & 2818T>C & 2821A>G & 2824G>A	80A>C & 89T>G & 93T>C	79A>G & 90T>C	80A>C & 89T>G & 93T>C & 1002A>G & 1006C>G & 1010C>T & 1018_1019insA & 1021T>A & 1023delG & 1038T>C & 1120T>C	None	None
XJ4	None	H652R	E62K	None	None	D283G & Y358N	None	137T>A & 142A>T & 1723G>A & 1865T>C & 2794C>T & 2796T>C & 2799A>G & 2802G>A	76G>A & 80A>C & 89T>G & 250A>T & 253A>T & 273T>A	76G>A & 79A>G & 90T>C & 93C>T & 226A>G & 250A>T & 253A>T & 273T>A	76G>A & 80A>C & 89T>G & 250A>T & 253A>T & 273T>A & 1120T>C	None	None
XJ40	S83L & D87N & D678E & A863V	S492N & A618T	S80I & E62K & D475E	S458A & T172A	None	H2R & D283G	None	264C>G & 356G>A & 541delA & 543G>T & 546_547insA & 548G>T & 550C>G & 552delT & 1723G>A & 1869_1870insG & 1870C>T & 1872_1873insC & 2794C>T	264C>A & 1002G>A & 1006G>C & 1010T>C & 1019delA & 1022A>T & 1023_1024insG & 1038C>T	79A>G & 80C>A & 89G>T & 90T>C & 93C>T & 226A>G & 264C>A & 1002G>A & 1006G>C & 1010T>C & 1019delA & 1022A>T & 1023_1024insG & 1038C>T	264C>A & 1120T>C	None	None
XJ48	S83L & D87N & A828T	None	S80I & E62K	None	None	D283G & Y358N	None	264C>G & 542_543insA & 544C>A & 545T>G & 546T>C & 548G>A & 549G>T & 550_551insT & 1211C>T & 1220G>A & 1229C>T & 2211A>G & 2794C>T & 2796T>C & 2799A>G & 2802G>A	250A>T & 253A>T & 273T>A	79A>G & 80C>A & 89G>T & 90T>C & 93C>T & 226A>G & 250A>T & 253A>T & 273T>A	250A>T & 253A>T & 273T>A & 1120T>C	None	None
XJ49	S83L & D87N	None	S80I & E62K	None	None	H2R	None	1211C>T & 1723G>A & 1730C>T & 1865T>C & 2132T>A & 2794C>T & 2796T>C & 2799A>G & 2802G>A	79G>A & 80A>C & 89T>G & 250A>T & 253A>T & 273T>A & 1002G>A & 1006G>C & 1010T>C & 1019delA & 1022A>T & 1023_1024insG & 1038C>T	90T>C & 93C>T & 226A>G & 250A>T & 253A>T & 273T>A & 1002G>A & 1006G>C & 1010T>C & 1019delA & 1022A>T & 1023_1024insG & 1038C>T	79G>A & 80A>C & 89T>G & 250A>T & 253A>T & 273T>A & 1120T>C	None	V857A
XJ5	N652H	None	E62K	None	None	None	None	547A>C & 1211C>T & 1723G>A & 1868_1869insC & 1872_1873insG	80A>C & 89T>G & 93T>C & 1002G>A & 1006G>C & 1010T>C & 1019delA & 1022A>T & 1023_1024insG & 1038C>T	79A>G & 90T>C & 226A>G & 1002G>A & 1006G>C & 1010T>C & 1019delA & 1022A>T & 1023_1024insG & 1038C>T	80A>C & 89T>G & 93T>C & 1120T>C	N17D	None
XJ50	S83L & D87N & D678E	None	S80I & E84G & E62K & D475E	None	G144S	D283G & Y358N	N49K	264C>G & 356G>A & 1723G>A & 2211A>G & 2794C>T & 2796T>C & 2799A>G & 2802G>A	80A>C & 89T>G & 93T>C	79A>G & 90T>C & 226A>G	80A>C & 89T>G & 93T>C & 1002A>G & 1006C>G & 1010C>T & 1018_1019insA & 1021T>A & 1023delG & 1038T>C & 1120T>C	None	None
XJ9	None	H652R	E62K	None	None	D283G & Y358N	None	137T>A & 142A>T & 316C>T & 1723G>A & 1865T>C & 2794C>T & 2796T>C & 2799A>G & 2802G>A	79G>A & 80A>C & 89T>G & 90C>T & 93T>C	226A>G	79G>A & 80A>C & 89T>G & 90C>T & 93T>C & 1120T>C	None	None
YN13	S83L & D87N	None	A56T & S80I & E62K & A620V	None	None	None	None	1174T>G & 2132T>A	226G>A	79A>G & 80C>A & 89G>T & 90T>C & 93C>T	226G>A & 1002A>G & 1006C>G & 1010C>T & 1018_1019insA & 1021T>A & 1023delG & 1038T>C & 1120T>C	None	None
YN17	None	None	E62K	None	None	Y358N	G231V	137T>A & 142A>T & 356G>A & 1350C>T & 1723G>A & 1865T>C & 2211A>G & 2794C>T & 2796T>C & 2799A>G & 2802G>A	79G>A & 80A>C & 89T>G & 90C>T & 93T>C & 1002G>A & 1006G>C & 1010T>C & 1019delA & 1022A>T & 1023_1024insG & 1038C>T	226A>G & 1002G>A & 1006G>C & 1010T>C & 1019delA & 1022A>T & 1023_1024insG & 1038C>T	79G>A & 80A>C & 89T>G & 90C>T & 93T>C & 1120T>C	None	None
YN19	None	None	E62K	None	None	Y358N	G231V	137T>A & 142A>T & 356G>A & 1350C>T & 1723G>A & 1865T>C & 2211A>G & 2794C>T & 2796T>C & 2799A>G & 2802G>A	79G>A & 80A>C & 89T>G & 90C>T & 93T>C & 1002G>A & 1006G>C & 1010T>C & 1019delA & 1022A>T & 1023_1024insG & 1038C>T	226A>G & 1002G>A & 1006G>C & 1010T>C & 1019delA & 1022A>T & 1023_1024insG & 1038C>T	79G>A & 80A>C & 89T>G & 90C>T & 93T>C & 1120T>C	None	None
YN20	None	None	E62K	None	None	Y358N	G231V	137T>A & 142A>T & 356G>A & 1350C>T & 1723G>A & 1865T>C & 2211A>G & 2794C>T & 2796T>C & 2799A>G & 2802G>A	79G>A & 80A>C & 89T>G & 90C>T & 93T>C & 1002G>A & 1006G>C & 1010T>C & 1019delA & 1022A>T & 1023_1024insG & 1038C>T	226A>G & 1002G>A & 1006G>C & 1010T>C & 1019delA & 1022A>T & 1023_1024insG & 1038C>T	79G>A & 80A>C & 89T>G & 90C>T & 93T>C & 1120T>C	None	None
YN22	None	None	E62K	None	None	Y358N	G231V	137T>A & 142A>T & 356G>A & 1350C>T & 1723G>A & 1865T>C & 2211A>G & 2794C>T & 2796T>C & 2799A>G & 2802G>A	79G>A & 80A>C & 89T>G & 90C>T & 93T>C & 1002G>A & 1006G>C & 1010T>C & 1019delA & 1022A>T & 1023_1024insG & 1038C>T	226A>G & 1002G>A & 1006G>C & 1010T>C & 1019delA & 1022A>T & 1023_1024insG & 1038C>T	79G>A & 80A>C & 89T>G & 90C>T & 93T>C & 1120T>C	None	None
YN33	S83L & D87N	None	S80I & E62K	None	None	D283G & Y358N	None	137T>A & 142A>T & 356G>A & 1723G>A & 2794C>T & 2796T>C & 2799A>G & 2802G>A	250A>T & 253A>T & 273T>A	79A>G & 80C>A & 89G>T & 90T>C & 93C>T & 226A>G & 250A>T & 253A>T & 273T>A	250A>T & 253A>T & 273T>A & 1002A>G & 1006C>G & 1010C>T & 1018_1019insA & 1021T>A & 1023delG & 1038T>C & 1120T>C	None	None
YN34	S83L & D87N	None	S80I & E62K	None	None	D283G & Y358N	None	137T>A & 142A>T & 1211C>T & 1220G>A & 1229C>T & 1723G>A & 2636C>T & 2794C>T & 2796T>C & 2799A>G & 2802G>A	None	79A>G & 80C>A & 89G>T & 90T>C & 93C>T & 226A>G	1120T>C	None	None
YN39	S83L & D87N	None	S80I & E62K	None	None	D283G & Y358N	None	137T>A & 142A>T & 1211C>T & 1220G>A & 1229C>T & 1723G>A & 2636C>T & 2794C>T & 2796T>C & 2799A>G & 2802G>A	None	79A>G & 80C>A & 89G>T & 90T>C & 93C>T & 226A>G	1120T>C	None	None
ZJ1	S83L	None	E62K	None	None	H2R & V74I	None	937C>T & 1211C>T & 1723G>A & 2132T>A & 2814C>T & 2816T>C & 2819A>G & 2822G>A	None	79A>G & 80C>A & 89G>T & 90T>C & 93C>T & 226A>G	1002A>G & 1006C>G & 1010C>T & 1018_1019insA & 1021T>A & 1023delG & 1038T>C & 1120T>C	None	None
ZJ20	T611S & D678E	None	E62K	None	None	None	None	947C>T & 956G>A & 965C>T & 1459G>A & 1461T>C & 1462C>G & 1463C>A & 1466C>T & 1469G>T & 1470G>C & 1471A>G & 2530C>T & 2532T>C & 2535A>G & 2538G>A	80A>C & 89T>G & 93T>C & 139A>G	79A>G & 90T>C & 139A>G & 226A>G	80A>C & 89T>G & 93T>C & 139A>G & 1002A>G & 1006C>G & 1010C>T & 1018_1019insA & 1021T>A & 1023delG & 1038T>C & 1120T>C	None	None
ZJ29	S83L	None	E62K	None	None	D283G & Y358N	None	1723G>A & 2794C>T & 2796T>C & 2799A>G & 2802G>A	80A>C & 89T>G & 93T>C	79A>G & 90T>C & 226A>G	80A>C & 89T>G & 93T>C & 1120T>C	None	None
